# Supplementary material for: Preparation of ethynylsulfonamides and study of their reactivity with nucleophilic amino acids
Source: Royal Society of Chemistry journal article supplement (doi:10.1039/d4ob01873g), 2025-01-01

# Preparation of Ethynylsulfonamides and Study of Their Reactivity with Nucleophilic Amino Acids

Tatsuhiro Kyoya,<sup>a</sup> Hiroaki Ishida,<sup>a</sup> Toshiaki Saitoh,<sup>b</sup> and  
Toshimasa Itoh<sup>\*a</sup>

<sup>a</sup>: Laboratory of Drug Design and Medicinal Chemistry, Showa Pharmaceutical University, 3-2-1  
Higashi-Tamagawagakuen, Machida, Tokyo 194-8543, Japan.

<sup>b</sup>: Division of Medicinal Informatics, Nihon Pharmaceutical University, 10281 Komuro, Ina-machi,  
kitaadachi-gun, Saitama 362-0806 Japan.

## Supporting Information

### Table of Contents

|                                                         |    |
|---------------------------------------------------------|----|
| General Methods .....                                   | 2  |
| General Procedure for the Syntheses of Substrates ..... | 3  |
| NMR Experiments.....                                    | 6  |
| Characterization Data .....                             | 22 |
| NMR spectra .....                                       | 70 |

## General Methods

Unless otherwise stated, reactions were performed under a nitrogen atmosphere using freshly dried solvents. Thin-layer chromatography (TLC) was performed using silica gel 70 F<sub>254</sub> TLC Plate-*Wako* and were visualized by UV, *p*-anisaldehyde, Sonnenschein's reagent, or I<sub>2</sub> (5% silica gel) staining. Flash chromatography was performed using silica gel (40 - 50  $\mu$ m particle size, spherical, neutral). Reverse-phase HPLC (RP-HPLC) was performed with a JASCO Gulliver system equipped with an Intelligent HPLC Pump PU-980 and an Intelligent UV/VIS Detector UV-970, and the eluent was detected by UV at 220 or 254 nm. For analytical RP-HPLC, a COSMOSIL 5C18-AR-II (4.6  $\times$  250 mm) packed column was employed with linear gradients of acetonitrile and H<sub>2</sub>O containing 0.1% (v/v) TFA with a flow rate of 1.0 mL min<sup>-1</sup>. For preparative RP-HPLC, a PEGASIL ODS (30  $\times$  250 mm) packed column was employed with linear gradients of acetonitrile and H<sub>2</sub>O containing 0.1% (v/v) TFA with a flow rate of 10 mL min<sup>-1</sup>. NMR spectra were recorded on a JEOL ECZ400S (at 400 MHz for <sup>1</sup>H NMR and 101 MHz for <sup>13</sup>C NMR), and are reported relative to internal TMS (<sup>1</sup>H,  $\delta$  = 0.00) or DMSO-*d*<sub>6</sub> (<sup>1</sup>H  $\delta$  = 2.54), and CDCl<sub>3</sub> (<sup>13</sup>C,  $\delta$  = 77.0) or DMSO-*d*<sub>6</sub> (<sup>13</sup>C = 39.5). Data for <sup>1</sup>H NMR spectra are reported as follows: chemical shift ( $\delta$  ppm) (multiplicity, coupling constant (Hz), integration). Multiplicity and qualifier abbreviations are as follows: s = singlet, d = doublet, t = triplet, q = quartet, quin = quintet, sext = sextet, sep = septet, oct = octet, m = multiplet, br = broad. IR spectra were recorded on Jasco FT/IR-420 spectrometer (KBr tablet, NaCl plate), and Jasco FT/IR-4100 spectrometer (ATR). Absorbance abbreviations are as follows: vs = very strong, s = strong, m = medium, w = weak, br = broad. High-resolution mass spectrometry (HRMS) spectra were obtained with a JEOL AccuTOF LC-plus JMS-T100LP spectrometer (ESI), and JEOL JMS-700MS station (EI, FAB). FAB matrix is  $\alpha$ -thioglycerol.

### Abbreviations used:

|                                          |                                 |
|------------------------------------------|---------------------------------|
| DBU – 1,8-Diazabicyclo[5.4.0]undec-7-ene | 2-ME – 2-Mercaptoethanol        |
| DCC – Dicyclohexylcarbodiimide           | PBS – Phosphate-buffered saline |
| DCM – Dichloromethane                    | TFA – Trifluoroacetic acid      |
| DIPA – Diisopropylamine                  | THF – Tetrahydrofuran           |
| DMAP – 4-Dimethylaminopyridine           |                                 |
| DMF – <i>N,N</i> -Dimethylformamide      |                                 |
| DMSO – Dimethylsulfoxide                 |                                 |
| HMDS – Hexamethyldisilazane              |                                 |
| LDA – Lithium diisopropylamide           |                                 |
| LHMDS – Lithium bis(trimethylsilyl)amide |                                 |
| MeI – Iodomethane                        |                                 |

## General Procedure for the Syntheses of Substrates

### General Procedure 1A

2-Chloroethanesulfonyl chloride (4.08 g, 2.63 mL, 25 mmol) in DCM (25 mL), a solution of amine (27.5 mmol, 1.1 equiv.) and triethylamine (14.0 g, 10.5 mL, 75 mmol, 3.0 equiv.) in DCM (25 mL) was added dropwise at 0 °C over a period of 30 minutes. After the reaction mixture was stirred for 3 hours at room temperature, the reaction mixture was washed sequentially with 1 M HCl aqueous solution, distilled water, and then brine, and the organic layer was dried over Na<sub>2</sub>SO<sub>4</sub>. After concentration, chromatography was performed on the residue on a silica gel column to give *N*-substituted vinylsulfonamide (**3**).

### General Procedure 1B

2-Chloroethanesulfonyl chloride (4.08 g, 2.63 mL, 25 mmol) and DMAP (28 mg, 0.25 mmol, 1.0 mol%) in DCM (25 mL), a solution of amine (27.5 mmol, 1.1 equiv.) and triethylamine (14.0 g, 10.5 mL, 75 mmol, 3.0 equiv.) in DCM (25 mL) was added dropwise at 0 °C over a period of 30 minutes. After the reaction mixture was stirred for 3 hours at 0 °C, the reaction mixture was washed sequentially with 1 M HCl aqueous solution, distilled water, and then brine, and the organic layer was dried over Na<sub>2</sub>SO<sub>4</sub>. After concentration, chromatography was performed on the residue on a silica gel column to give *N*-substituted vinylsulfonamide (**3**).

### General Procedure 1C

The amine (27.5 mmol, 1.1 equiv.), triethylamine (14.0 g, 10.5 mL, 75 mmol, 3.0 equiv.) and DMAP (28 mg, 0.25 mmol, 1.0 mol%) were dissolved in DCM (100 mL). 2-Chloroethanesulfonyl chloride (4.08 g, 2.63 mL, 25 mmol) was added at 0 °C. After the reaction mixture was stirred for 3 hours at 0 °C, the reaction mixture was washed sequentially with 1 M HCl aqueous solution, distilled water, and then brine, and the organic layer was dried over Na<sub>2</sub>SO<sub>4</sub>. After concentration, chromatography was performed on the residue on a silica gel column to give *N*-substituted vinylsulfonamide (**3**).

### General Procedure 2

To a solution of the **3** (5 mmol) in DCM (10 mL) was added a solution of bromine (0.26 mL, 5.0 mmol, 1.0 equiv.) at 0 °C. The mixture was stirred at 0 °C for 5 minutes and warm to room temperature for 18 hours. the reaction mixture was quenched with saturated Na<sub>2</sub>S<sub>2</sub>O<sub>3</sub> aqueous solution (10 mL). After the reaction mixture had been washed three times with saturated Na<sub>2</sub>S<sub>2</sub>O<sub>3</sub> aqueous solution. After separation, the organic layer was dried over Na<sub>2</sub>SO<sub>4</sub> and concentrated under reduced pressure. To a solution of the residue in DCM (20 mL) was added a solution of triethylamine (5.2 g, 0.71 mL, 5.5 mmol) in DCM (20 mL) over 30 min, and the reaction mixture was stirred at room temperature for 15

hours. The reaction mixture was washed three times with distilled water, once with brine, and the organic layer was dried over Na<sub>2</sub>SO<sub>4</sub>. After concentration, chromatography was performed on the residue on a silica gel column to give 1-bromo-*N*-substituted ethenylsulfonamide (**1**).

#### General Procedure 3A

To a stirred solution of the reactant (3 mmol) in dry THF (15 mL), LHMDS (10.5 mL, 1 M solution in THF, 3.5 equiv.) and dry THF (4.5 mL) were added at –78 °C over 10–15 minutes. After the reaction mixture was stirred for 30 minutes at 0 °C, the mixture was quenched with 5 M HCl aqueous solution (10 mL) at 0 °C. To the reaction mixture, EtOAc (30 mL) and distilled water (50 mL) were added. The reaction mixture was extracted three times with EtOAc, washed once with brine, and the organic layer was dried over Na<sub>2</sub>SO<sub>4</sub>. After concentration, chromatography was performed on the residue on a silica gel column to give product *N*-substituted ethynylsulfonamide (**2**).

#### General Procedure 3B

To a stirred solution of the reactant (3 mmol) in dry THF (15 mL), LHMDS (7.5 mL, 1 M solution in THF, 2.5 equiv.) and dry THF (2.5 mL) were added at –78 °C over 10–15 minutes. After the reaction mixture was stirred for 30 minutes at 0 °C, the mixture was quenched with 5 M HCl aqueous solution (10 mL) at 0 °C. To the reaction mixture, EtOAc (30 mL) and distilled water (50 mL) were added. The reaction mixture was extracted three times with EtOAc, washed once with brine, and the organic layer was dried over Na<sub>2</sub>SO<sub>4</sub>. After concentration, chromatography was performed on the residue on a silica gel column to give *N*-substituted ethynylsulfonamide (**2**).

#### General Procedure 3C

To a stirred solution of the reactant (3 mmol) in dry THF (15 mL), *t*-BuOK (10.5 mL, 1 M solution in THF, 3.5 equiv.) and dry THF (4.5 mL) were added at –78 °C over 10–15 minutes. After the reaction mixture was stirred for 30 minutes at 0 °C, the mixture was quenched with 5 M HCl aqueous solution (10 mL) at 0 °C. To the reaction mixture, EtOAc (30 mL) and distilled water (50 mL) were added. The reaction mixture was extracted three times with EtOAc, washed once with brine, and the organic layer was dried over Na<sub>2</sub>SO<sub>4</sub>. After concentration, chromatography was performed on the residue on a silica gel column to give *N*-substituted ethynylsulfonamide (**2**).

#### General Procedure 4

To a stirred solution of the reactant (3 mmol) in dry THF (15 mL), LHMDS (10.5 mL, 1 M solution in THF, 3.5 equiv.) and dry THF (4.5 mL) were added at –78 °C over 10–15 minutes. The reaction mixture was then stirred for 30 minutes at 0 °C. MeI (69 µL, 1.1 equiv.) was added to the reaction mixture and stirred for 1 hour at room temperature. The mixture was quenched with 1 M HCl aqueous

solution (10 mL) at 0 °C. EtOAc (30 mL) and distilled water (50 mL) were added to the reaction mixture. The organic layer was extracted three times with EtOAc, washed once with brine, and dried over Na<sub>2</sub>SO<sub>4</sub>. After concentration, chromatography was performed on the residue on a silica gel column to give product.

#### General Procedure 5

To a solution of the reactant (0.50 mmol) in dry MeOH (3.0 mL) was added AcCl (11 µL) and stirred at room temperature for 30 min. The reaction mixture was diluted with 1,4-dioxane and concentrated in vacuo. After concentration, chromatography was performed on the residue on a silica gel column to give product.

#### General Procedure 6A

The amine (10 mmol), propiolic acid (**11**, 680 µL, 11 mmol) and DMAP (12.2 mg, 1.0 mol%) were added to DCM (20 mL) and the solution was cooled to 0 °C. To the reaction solution was then added dropwise a solution of DCC (2.27 g, 11 mmol, 1.1 equiv) in DCM (20 mL) and the reaction was allowed to warm to room temperature and stirred for 3 hours. After the reaction was completed, the reaction mixture was filtered through Celite pad and the solvent was removed in vacuo. After concentration, chromatography was performed on the residue on a silica gel column to give *N*-substituted ethynylamide (**13**).

#### General Procedure 7

A solution of reactant (0.50 mmol) in H<sub>2</sub>O (2.5 mL) was added protected amino acid (Ac-AA-OMe) (0.50 mmol, 1.0 equiv.) at room temperature. The reaction mixture was diluted with EtOH and concentrated in vacuo. After concentration, chromatography was performed on the residue on a silica gel column or preparative RP-HPLC to give product.

#### Water Solubility

A sufficient amount of the compound and 5.0% (v/v) MeCN in water was added, followed by vigorous stirring for 30 seconds. The mixture was then allowed to stand for 2 hours at 19°C to produce a saturated solution. The saturated solution was then diluted and its concentration was determined by UV absorption with reference to a previously prepared calibration curve.

## NMR Experiments

### CD<sub>3</sub>CN solution

The reactant (300  $\mu$ L, 40 mM solution in CD<sub>3</sub>CN) and protected amino acid (Ac-AA-OMe) (300  $\mu$ L, 60 mM solution in CD<sub>3</sub>CN) were added to the NMR tube and mixed by shaking up and down, then the foam was removed by ultrasound. The reaction was then followed over time by <sup>1</sup>H-NMR.

### H<sub>2</sub>O or PBS solution

The reactant (300  $\mu$ L, 40 mM solution in H<sub>2</sub>O) and protected amino acid (Ac-AA-OMe) (300  $\mu$ L, 60 mM solution in DMSO-*d*<sub>6</sub>:H<sub>2</sub>O = 19:1) were added to the NMR tube and mixed by shaking up and down, then the foam was removed by ultrasound. The reaction was then followed over time by NoD-NMR. (PBS solution instead of H<sub>2</sub>O)

The following (1) and (2) was used for a single integrable peak on the NMR spectrum.

$$S_r + S_p = 1 \quad (1)$$

$$\frac{1}{C} = \frac{1}{20 \times 10^{-3} \times S_r} - \frac{1}{20 \times 10^{-3}} \quad (2)$$

*C*: Reactants concentration

*S<sub>r</sub>*: Integral value for reactants

*S<sub>p</sub>*: Integral value for products

Plot a  $\frac{1}{C} - t$  of graph. Calculate reaction rate constant (*k*) from the gradient of the Approximate line of least squares method. To substitute *k* in (3).

$$t_{1/2} = \frac{1}{20 \times 10^{-3} \times k} \quad (3)$$

*t<sub>1/2</sub>*: Half – life of products

Conversion rate is calculated for (4).

$$\text{Conversion rate} = \frac{S_p}{S_r + S_p} \times 100 \quad (4)$$

**Table S1.** Results of reaction monitoring by NMR

| Ac-AA-OMe                                                                           | Cys                  |                            |                            | His                   |                       |                      | Ser                |                  |      | Tyr                |                  |      | Lys·HCl                         |                            |                            |
|-------------------------------------------------------------------------------------|----------------------|----------------------------|----------------------------|-----------------------|-----------------------|----------------------|--------------------|------------------|------|--------------------|------------------|------|---------------------------------|----------------------------|----------------------------|
| Solv.                                                                               | CD <sub>3</sub> CN   | H <sub>2</sub> O           | PBS                        | CD <sub>3</sub> CN    | H <sub>2</sub> O      | PBS                  | CD <sub>3</sub> CN | H <sub>2</sub> O | PBS  | CD <sub>3</sub> CN | H <sub>2</sub> O | PBS  | CD <sub>3</sub> CN <sup>a</sup> | H <sub>2</sub> O           | PBS                        |
| 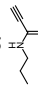 | n.r.                 |                            |                            | n.r.                  |                       |                      | n.r.               |                  |      | n.r.               |                  |      | n.r.                            |                            |                            |
| 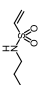 | n.r.                 |                            |                            | n.r.                  |                       |                      | n.r.               |                  |      | n.r.               |                  |      | n.r.                            |                            |                            |
| 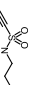 | 50 sec <sup>a</sup>  |                            |                            | 1300 min <sup>a</sup> |                       |                      | n.r.               |                  |      | n.r.               |                  |      | 10%<br>(48 h) <sup>b</sup>      |                            |                            |
| 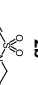   | n.r.                 |                            |                            | n.r.                  |                       |                      | n.r.               |                  |      | n.r.               |                  |      | n.r.                            |                            |                            |
| 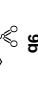   | n.r.                 |                            |                            | 190 min <sup>a</sup>  |                       |                      | n.r.               |                  |      | n.r.               |                  |      | 22%<br>(48 h) <sup>b</sup>      |                            |                            |
| 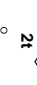   | n.r.                 | 42% <sup>b</sup><br>(52 h) | 11 min <sup>a</sup>        | n.r.                  | n.r.                  | n.r.                 | n.r.               | n.r.             | n.r. | n.r.               | n.r.             | n.r. | n.r.                            | n.r.                       | n.r.                       |
| 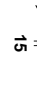   | n.r.                 | n.r.                       | 52% <sup>b</sup><br>(46 h) | n.r.                  | n.r.                  | n.r.                 | n.r.               | n.r.             | n.r. | n.r.               | n.r.             | n.r. | n.r.                            | n.r.                       | n.r.                       |
| 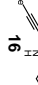   | n.r.                 | 63% <sup>b</sup><br>(48 h) | 63 min <sup>a</sup>        | n.r.                  | n.r.                  | n.r.                 | n.r.               | n.r.             | n.r. | n.r.               | n.r.             | n.r. | n.r.                            | n.r.                       | n.r.                       |
| 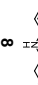   | 3.7 min <sup>a</sup> | 1.8 min <sup>a</sup>       | < 50 sec <sup>a</sup>      | 1600 min <sup>a</sup> | 3800 min <sup>a</sup> | 230 min <sup>a</sup> | n.r.               | n.r.             | n.r. | n.r.               | n.r.             | n.r. | 17%<br>(48 h) <sup>b</sup>      | 13%<br>(24 h) <sup>b</sup> |                            |
| 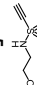   | n.r.                 | 24% <sup>b</sup><br>(50 h) | 64 min <sup>a</sup>        | n.r.                  | n.r.                  | n.r.                 | S                  | n.r.             | n.r. | n.r.               | n.r.             | n.r. | n.r.                            | n.r.                       | n.r.                       |
| 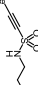   |                      | 61 min <sup>a</sup>        | 40 min <sup>a</sup>        |                       | 190 min <sup>a</sup>  | 360 min <sup>a</sup> |                    | n.r.             | n.r. |                    | n.r.             | n.r. |                                 | 22%<br>(24 h) <sup>b</sup> |                            |
| 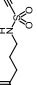   |                      | < 2.0 min <sup>a</sup>     | < 50 sec <sup>a</sup>      |                       | 190 min <sup>a</sup>  | 170 min <sup>a</sup> |                    | n.r.             | n.r. |                    | n.r.             | n.r. |                                 | 5%<br>(24 h) <sup>b</sup>  | 11%<br>(24 h) <sup>b</sup> |

Concentration: Amide or sulfonamide (20 mM) and protected amino acid (Ac-AA-OMe) (30 mM) were used. The analytical method involved CD<sub>3</sub>CN for <sup>1</sup>H-NMR, and H<sub>2</sub>O and PBS for NoD NMR (2.5 v/v% DMSO-*d*<sub>6</sub> added to H<sub>2</sub>O and PBS). n.r.: no reaction. a: Half-life of amide or sulfonamide (*t*<sub>1/2</sub>), c: The conversion rate (%) of the amide or sulfonamide was recorded as NMR yields for reactions with a half-life of more than 24 hours or those that stopped halfway., c: Solvent is CD<sub>3</sub>CN:H<sub>2</sub>O = 19:1.

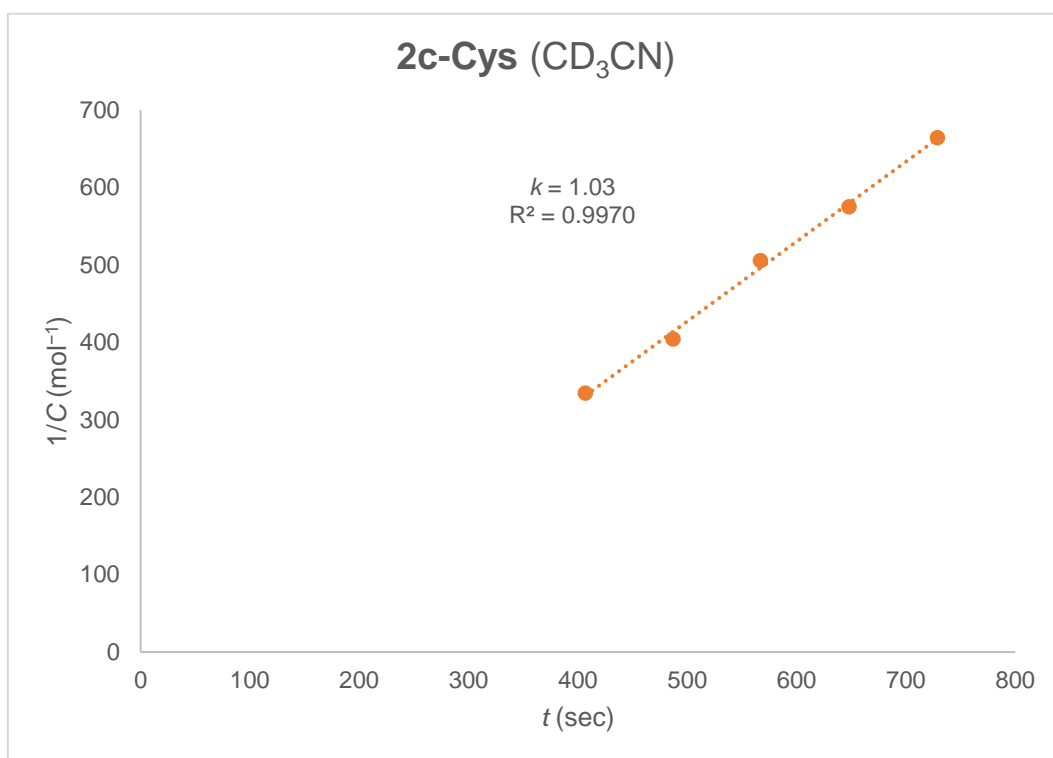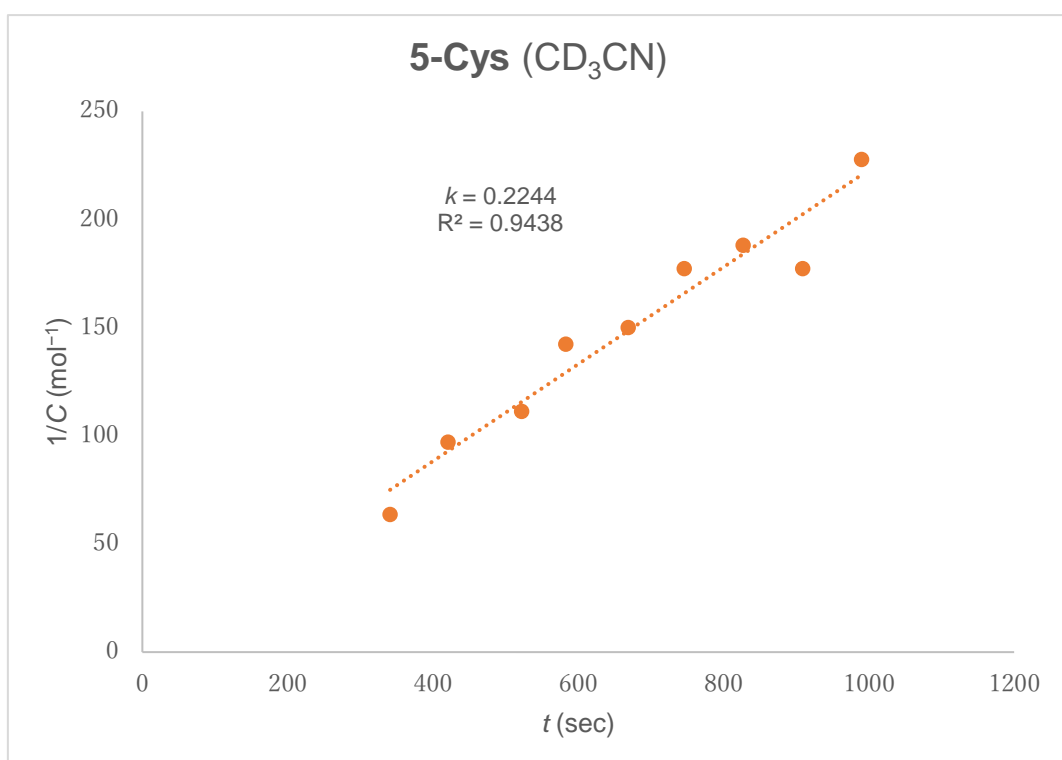

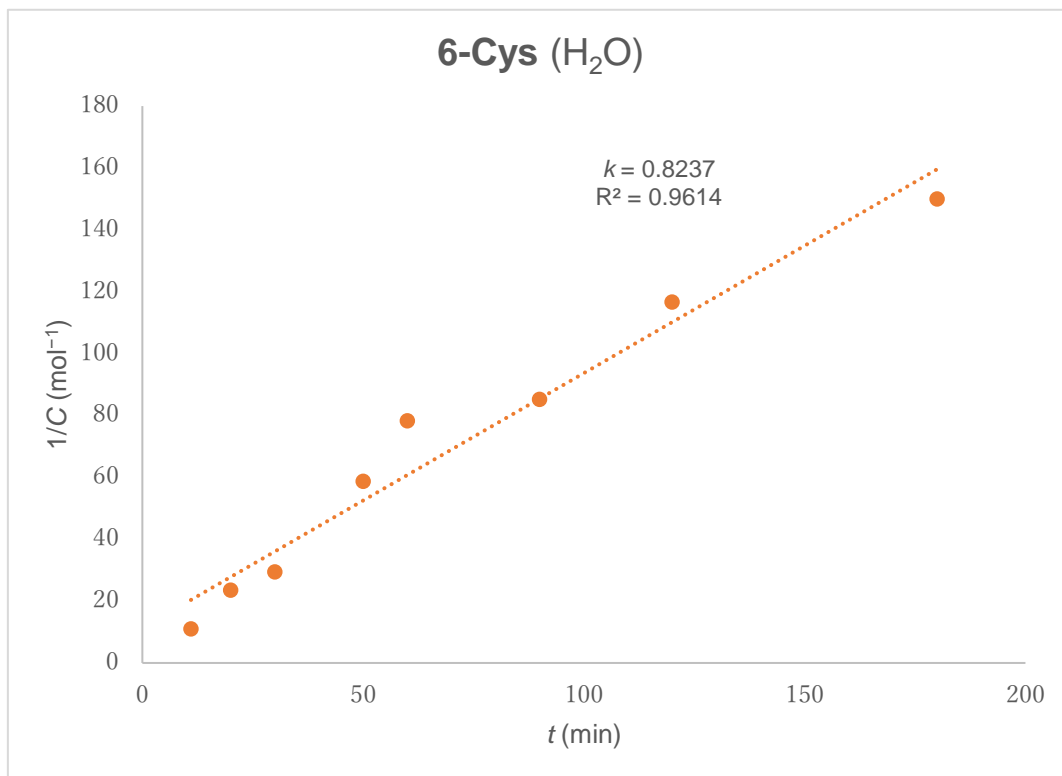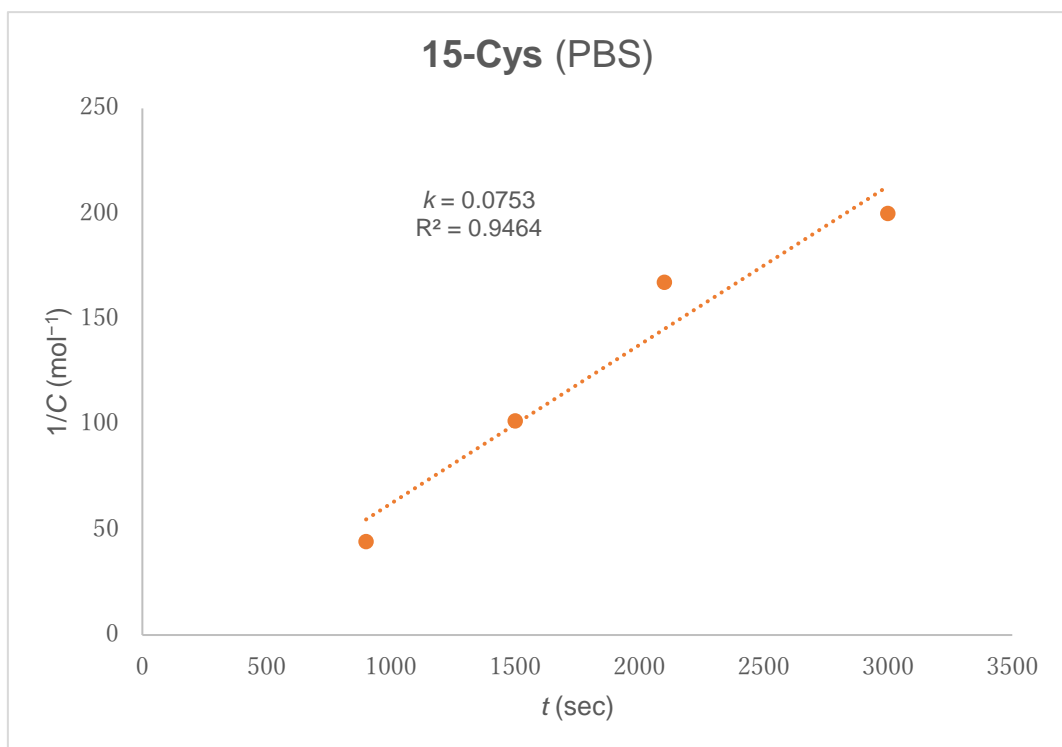

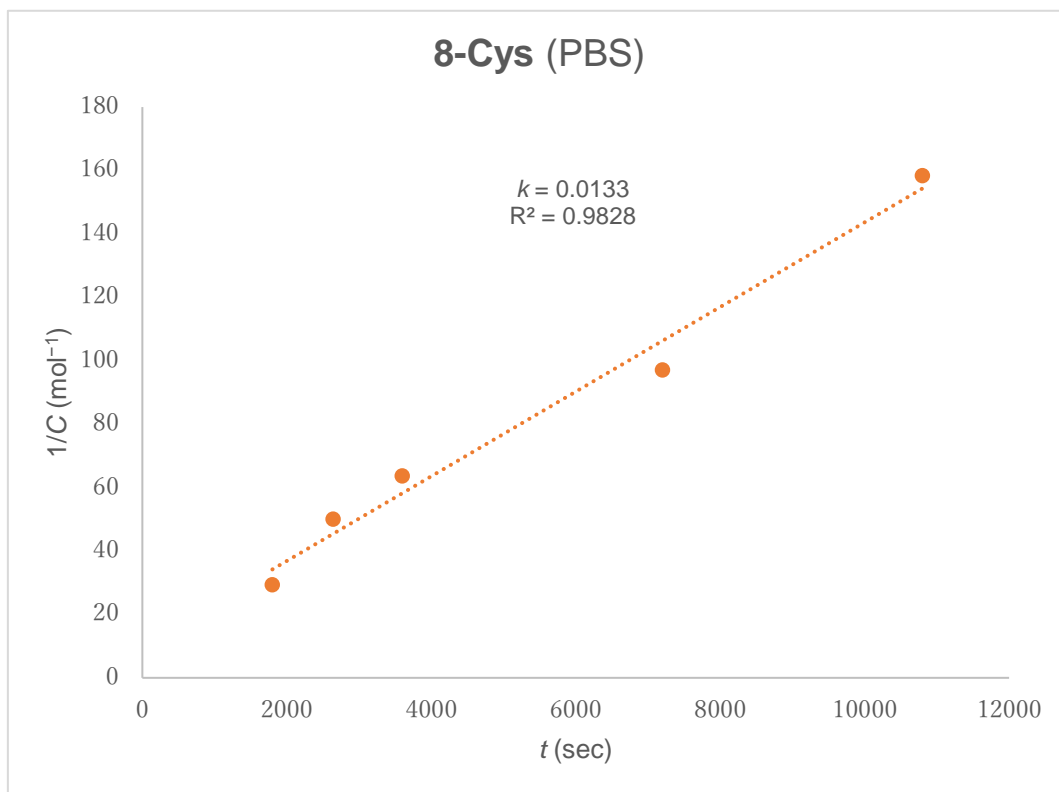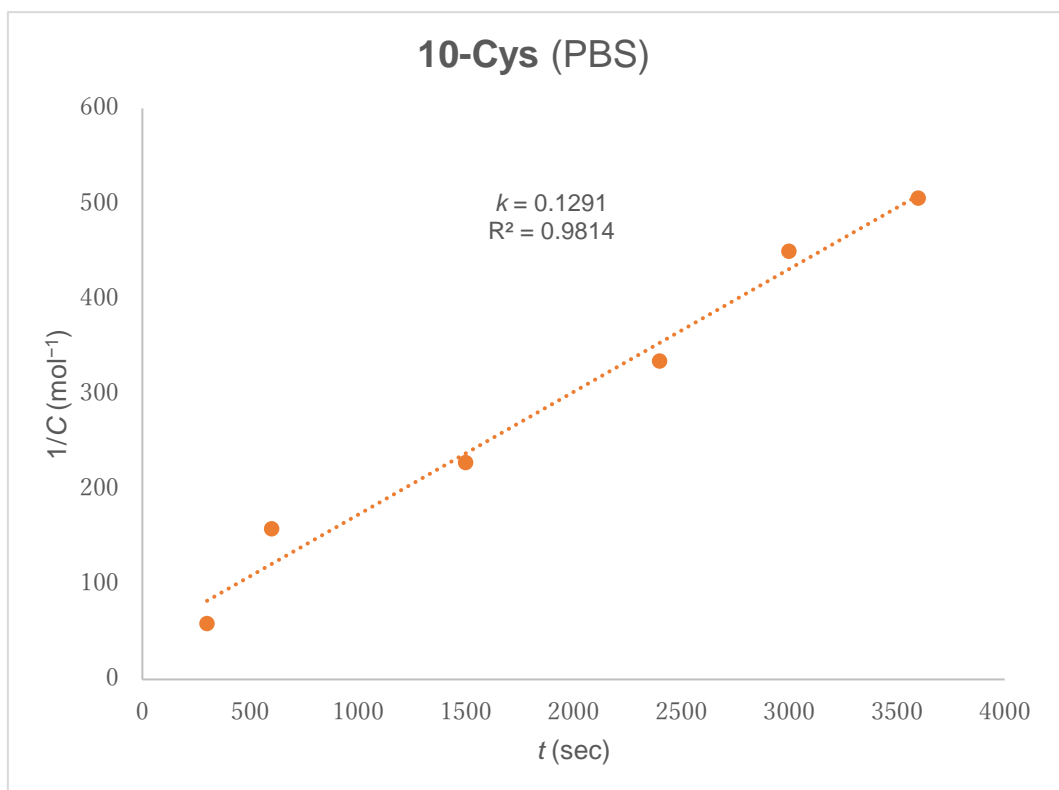

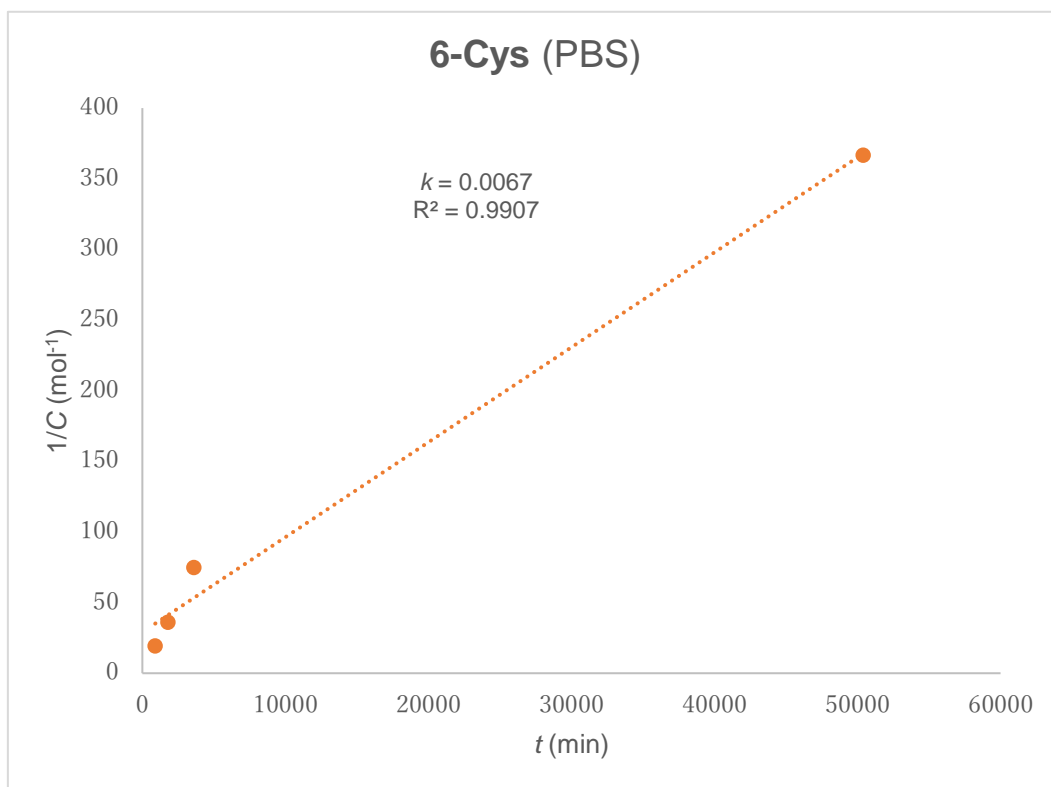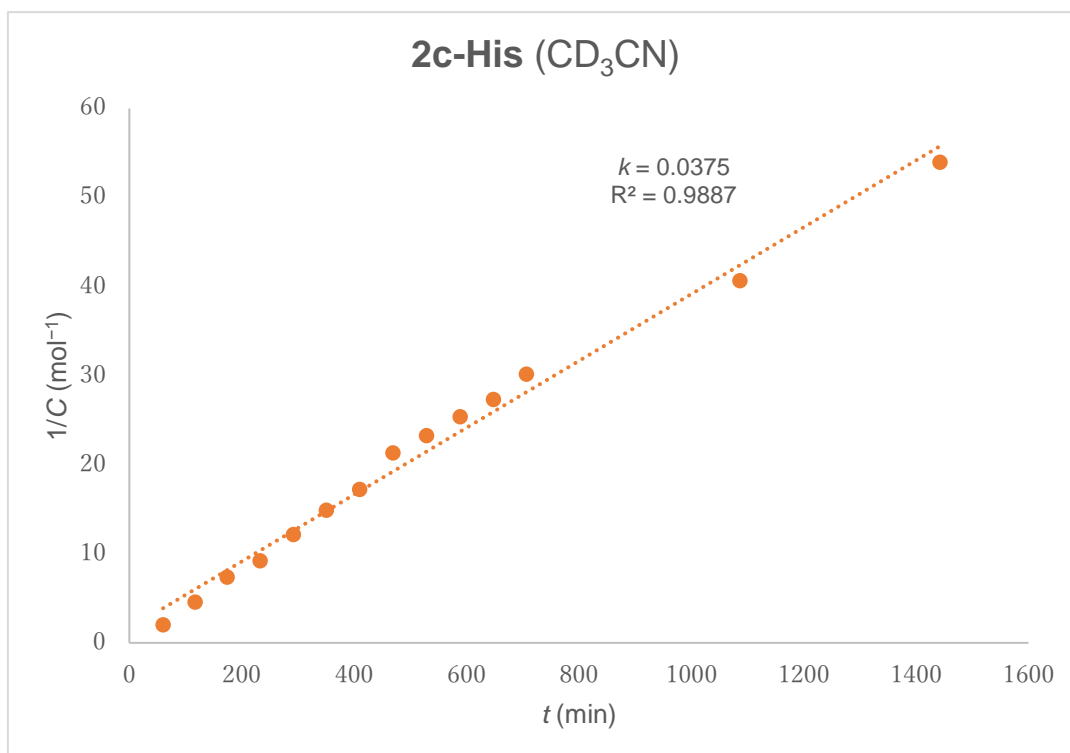

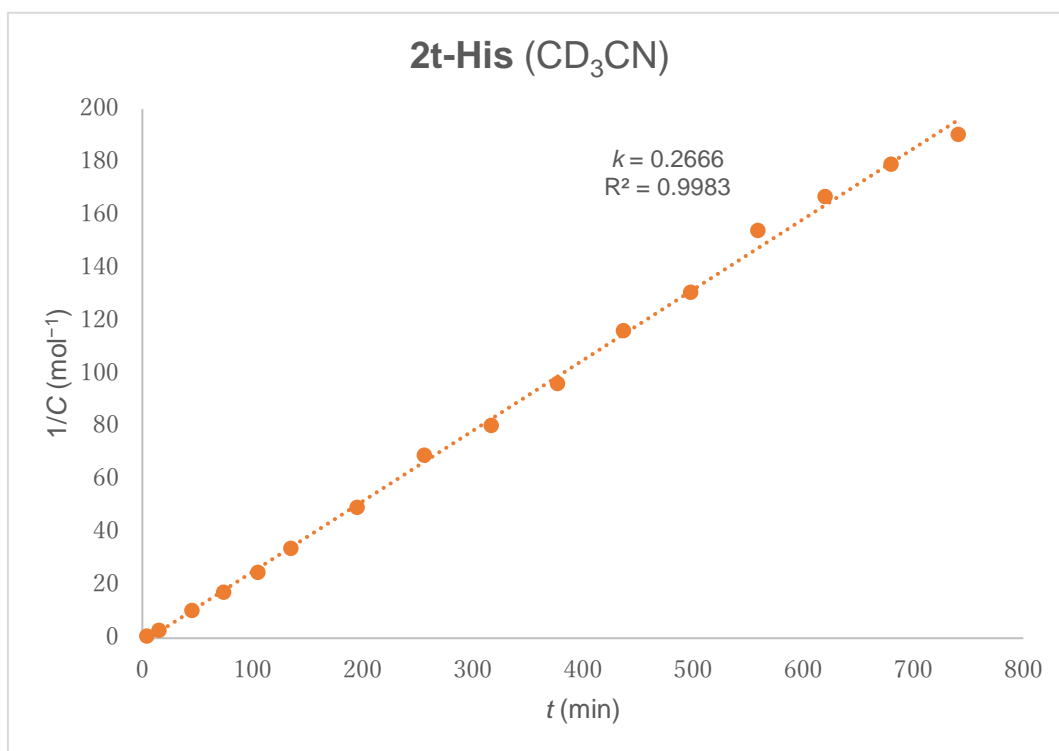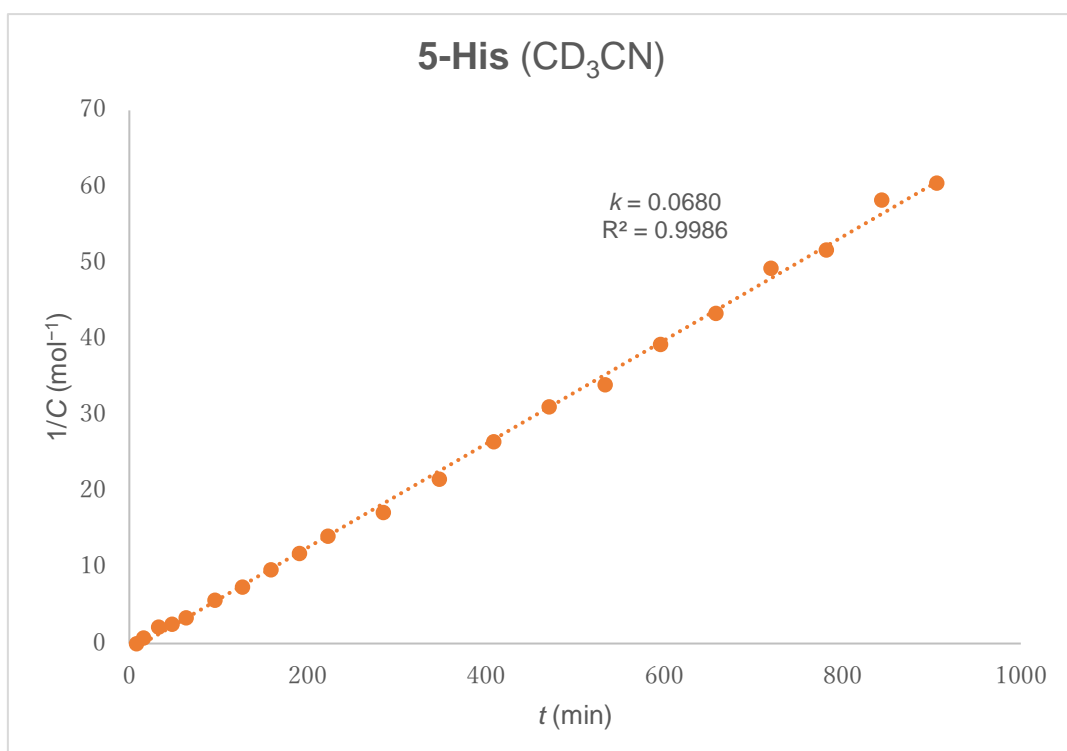

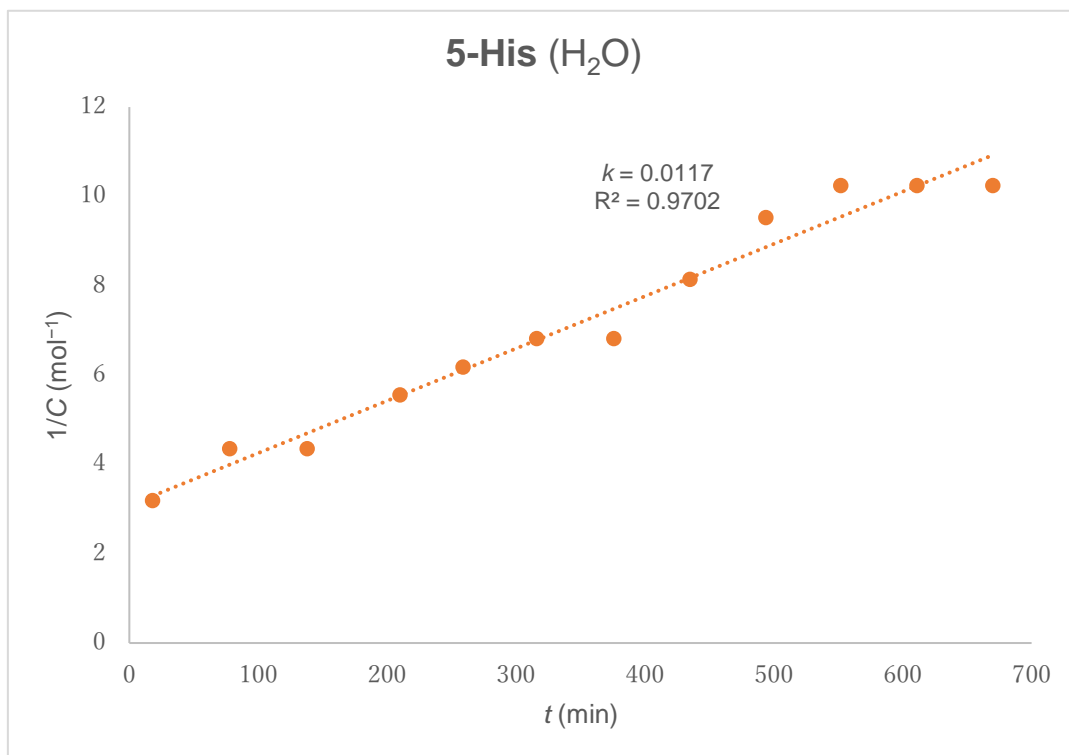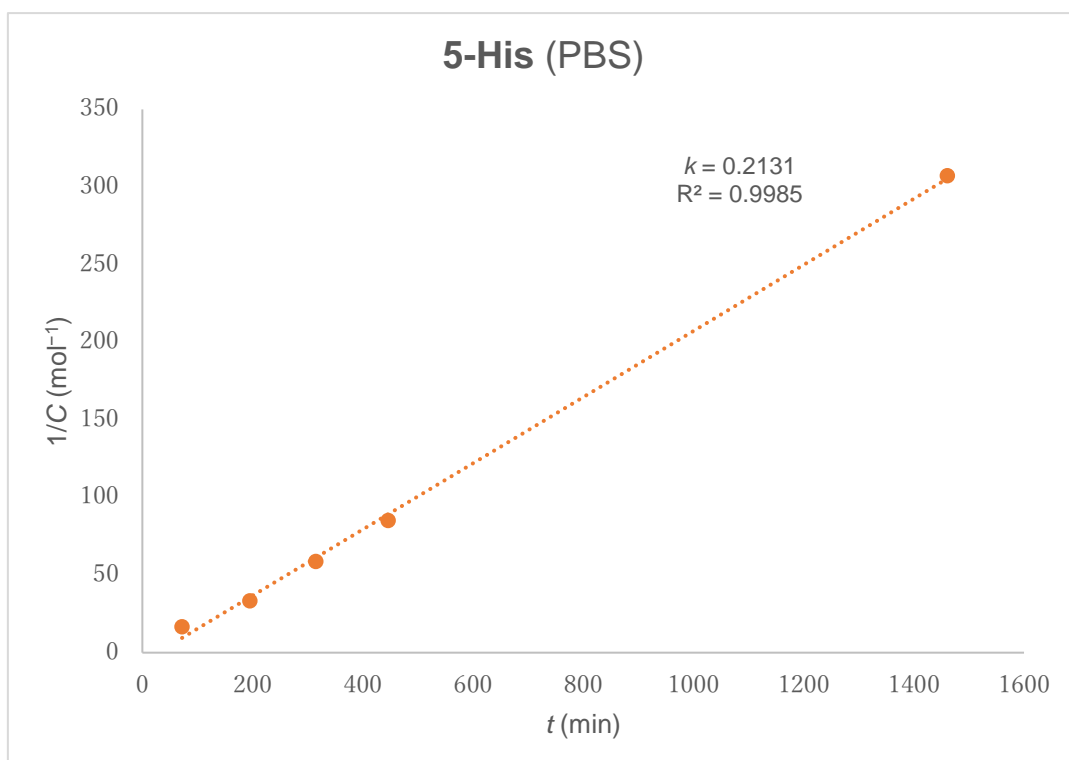

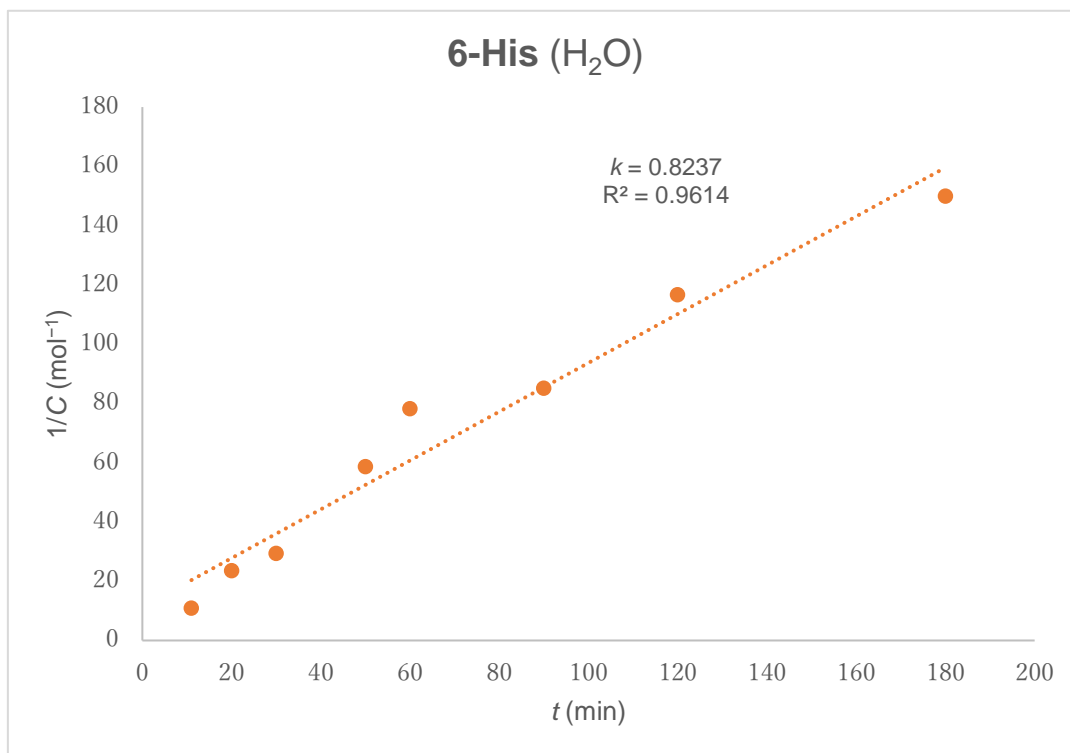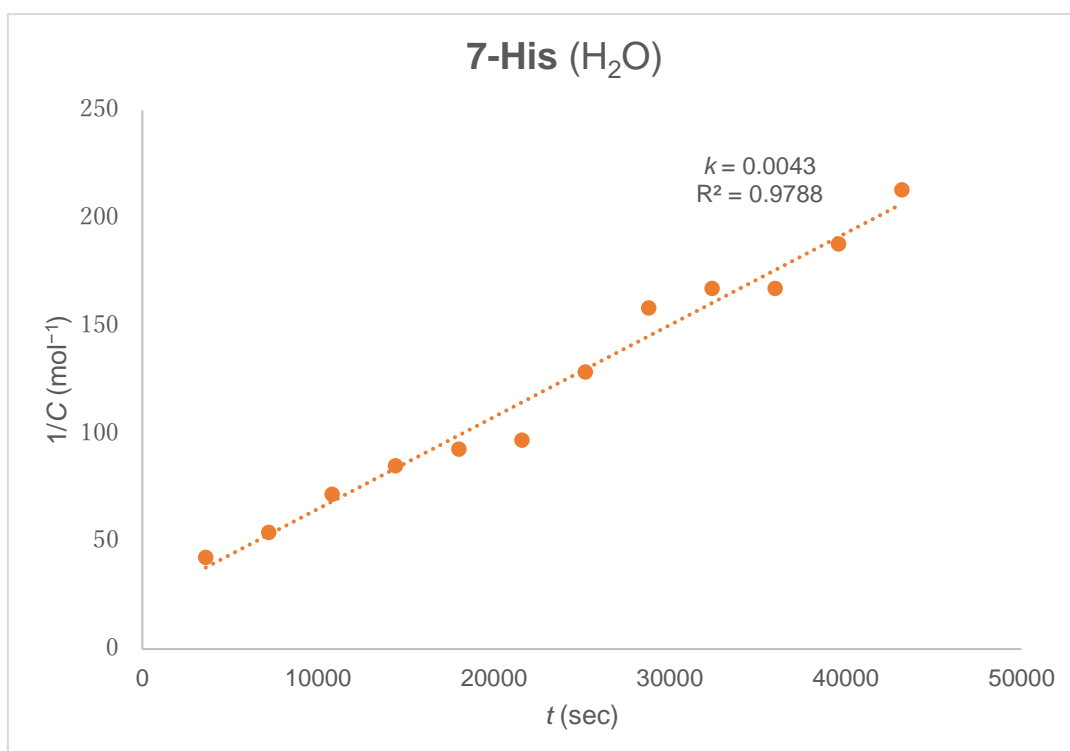

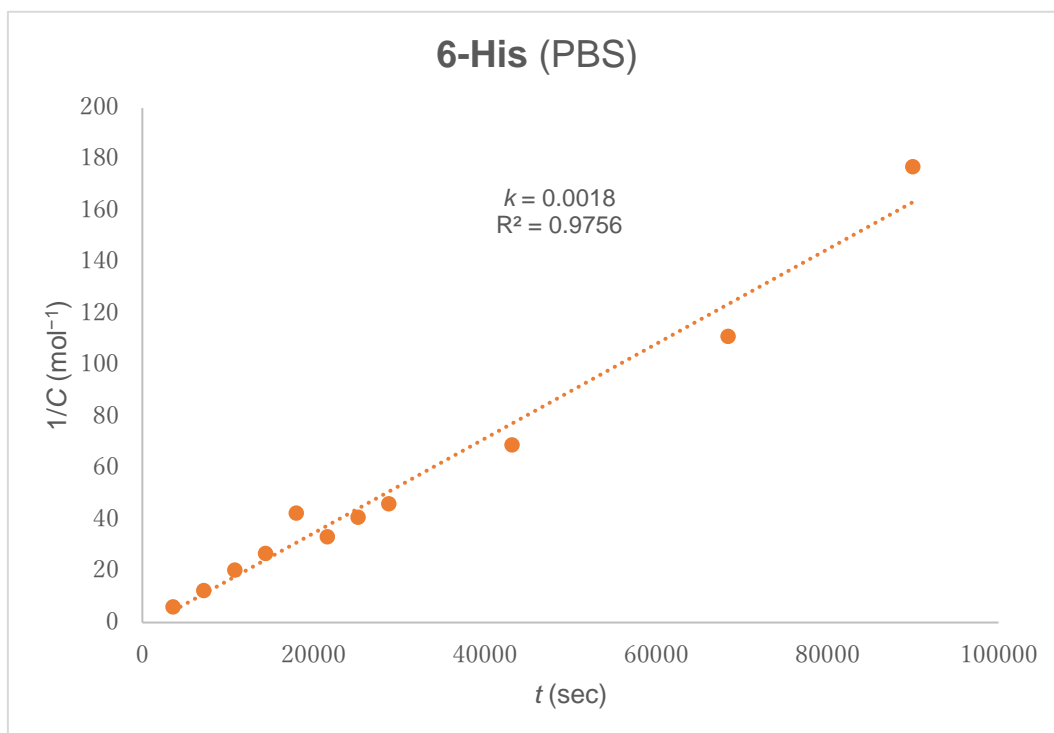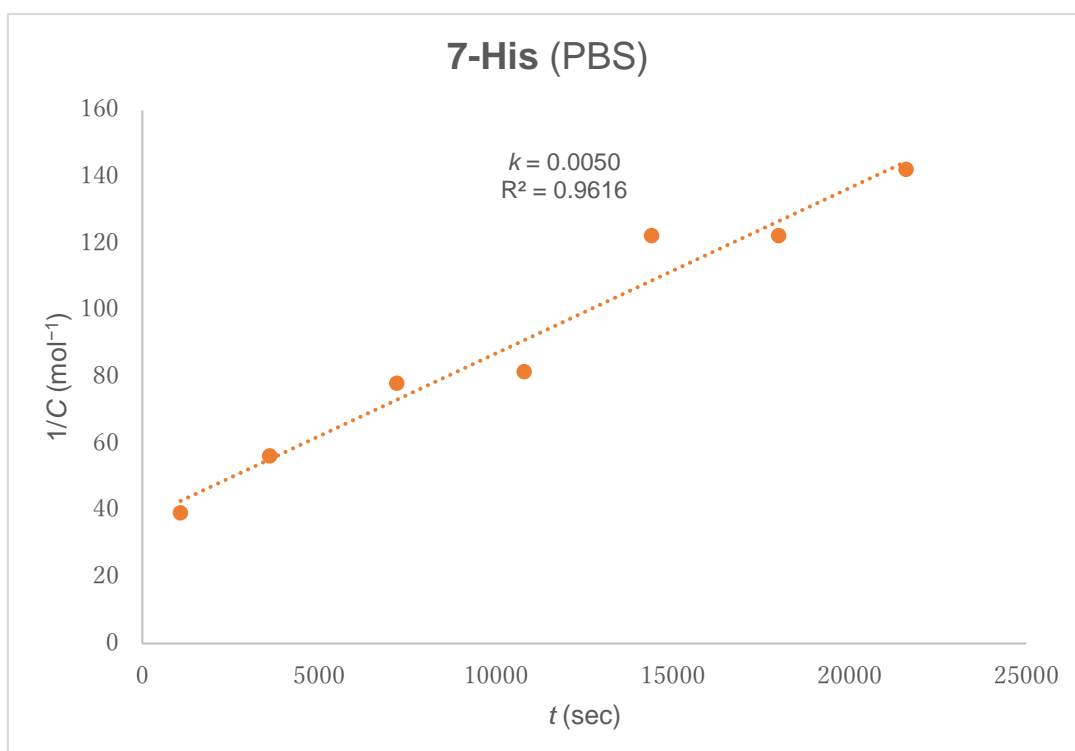

15-Cys (H<sub>2</sub>O, 52 h)

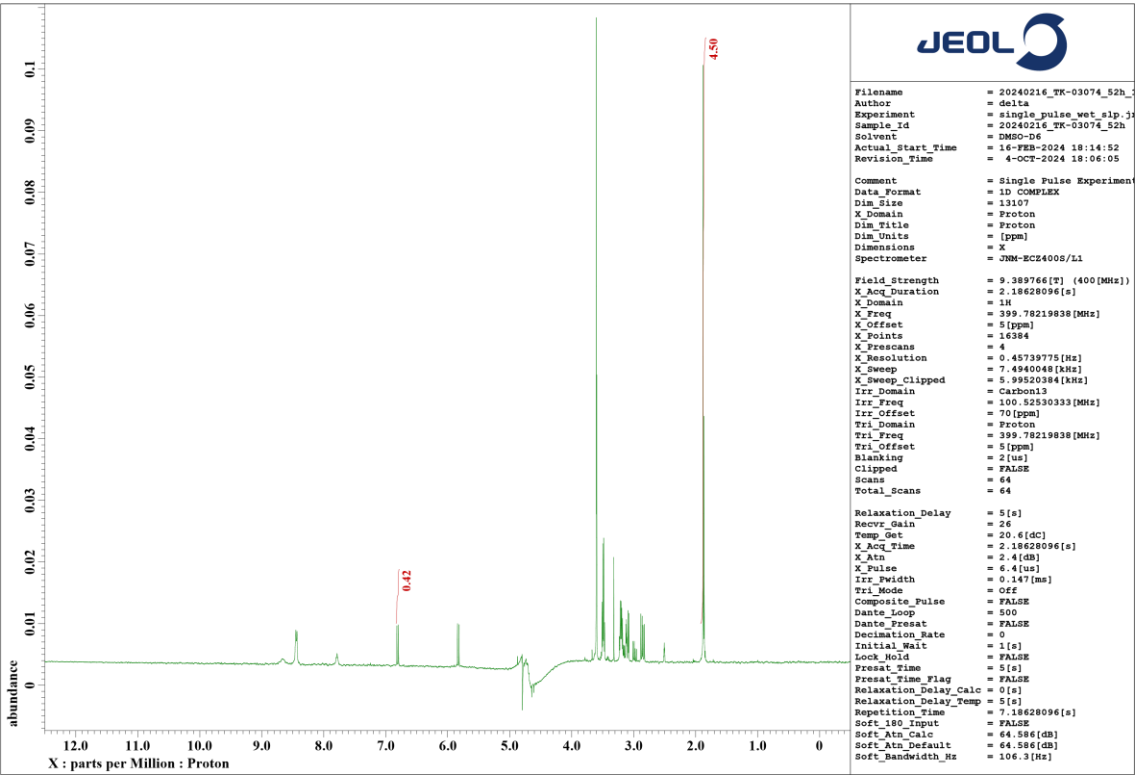

8-Cys (H<sub>2</sub>O, 48 h)

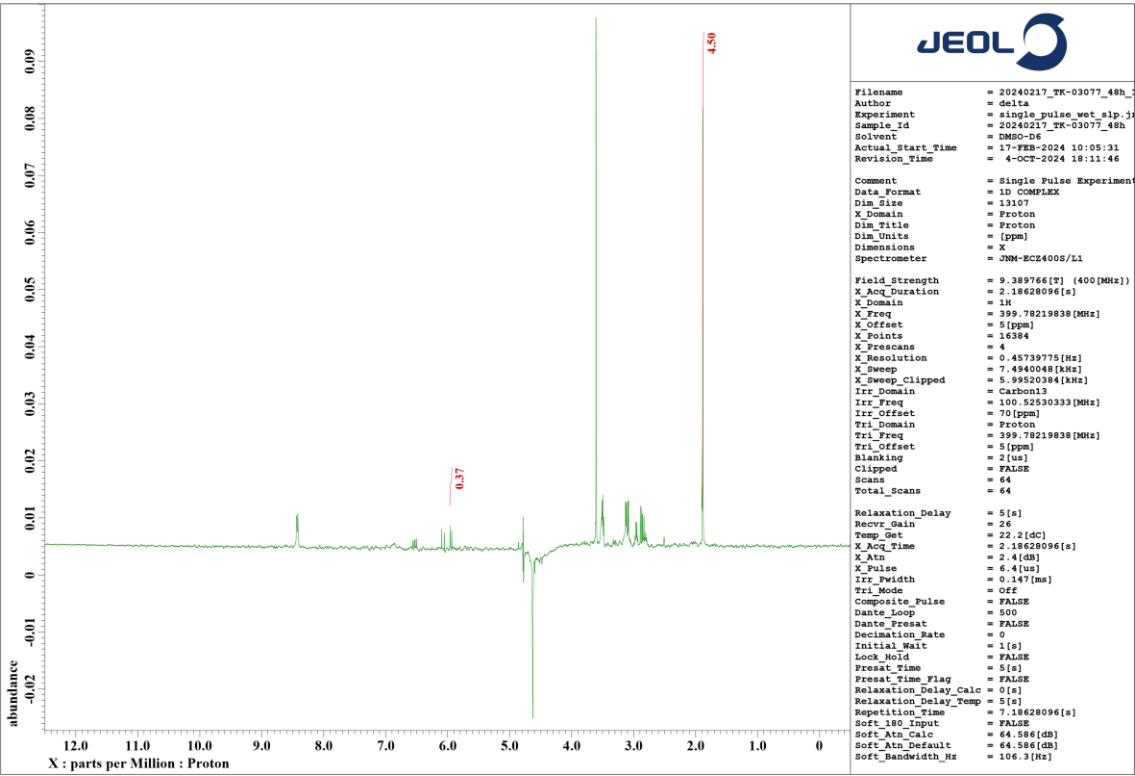

10-Cys (H<sub>2</sub>O, 24 h)

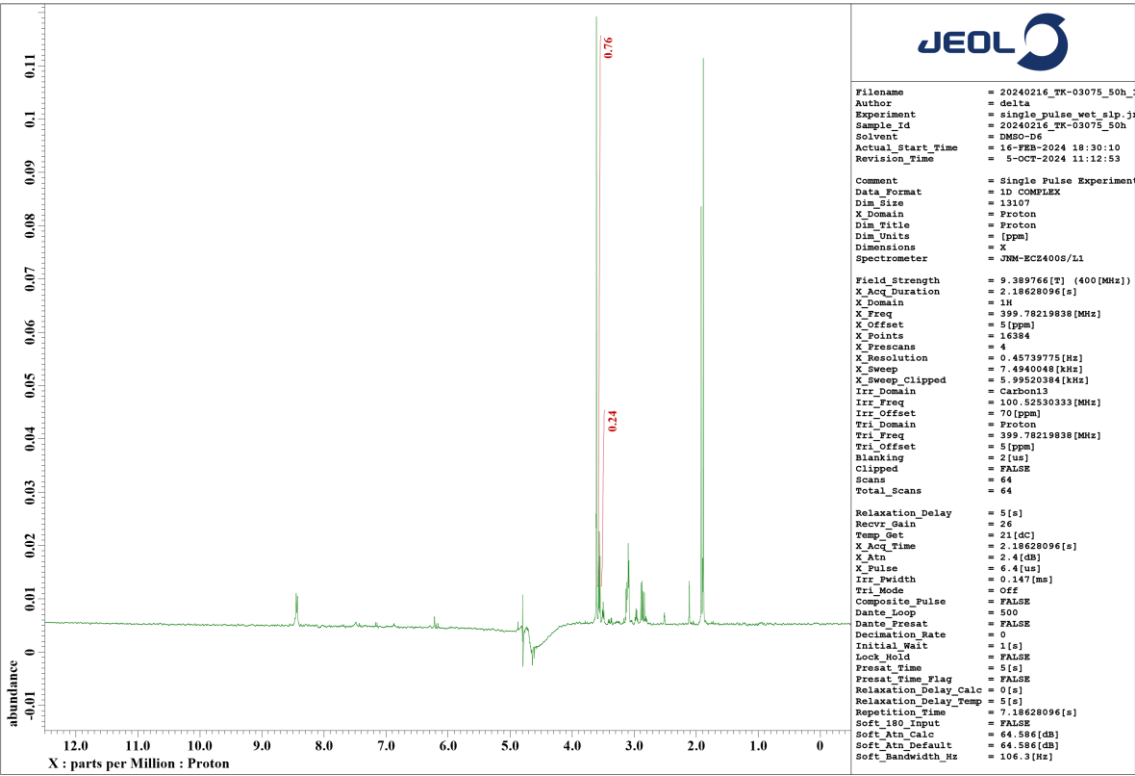

16-Cys (PBS, 46 h)

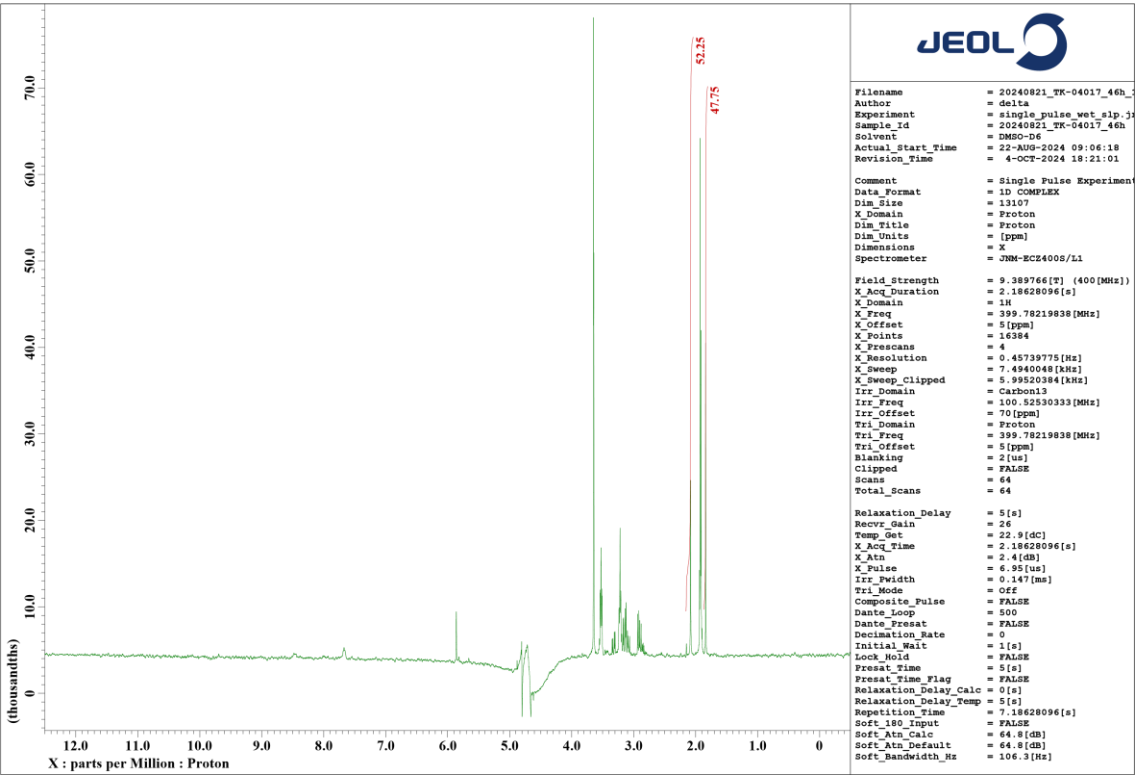

2c-Lys·HCl (CD<sub>3</sub>CN, 48 h)

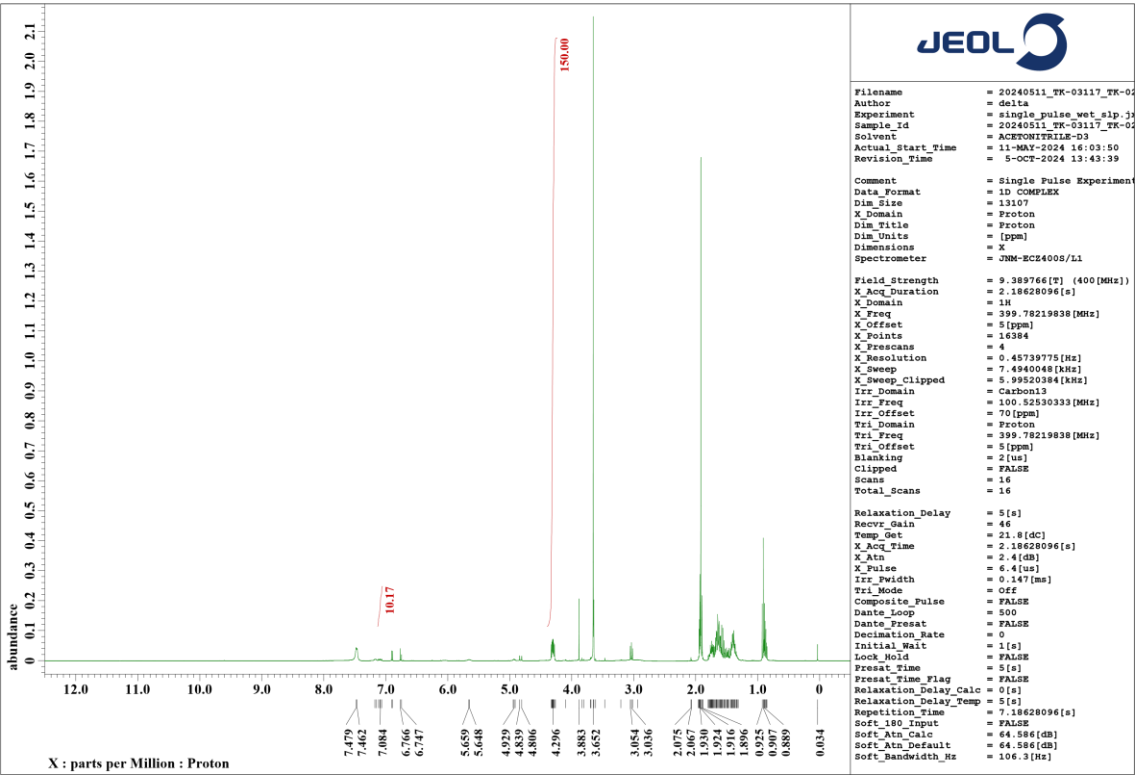

2t-Lys·HCl (CD<sub>3</sub>CN, 48 h)

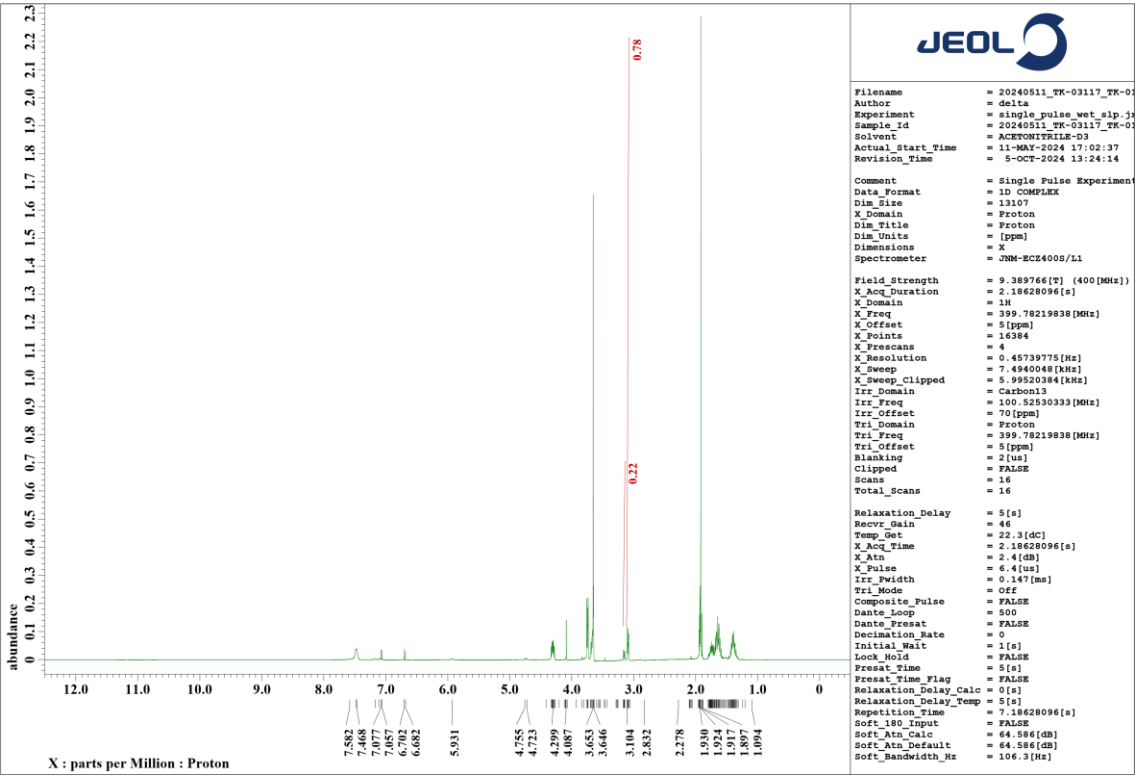

5-Lys·HCl (CD<sub>3</sub>CN, 48 h)

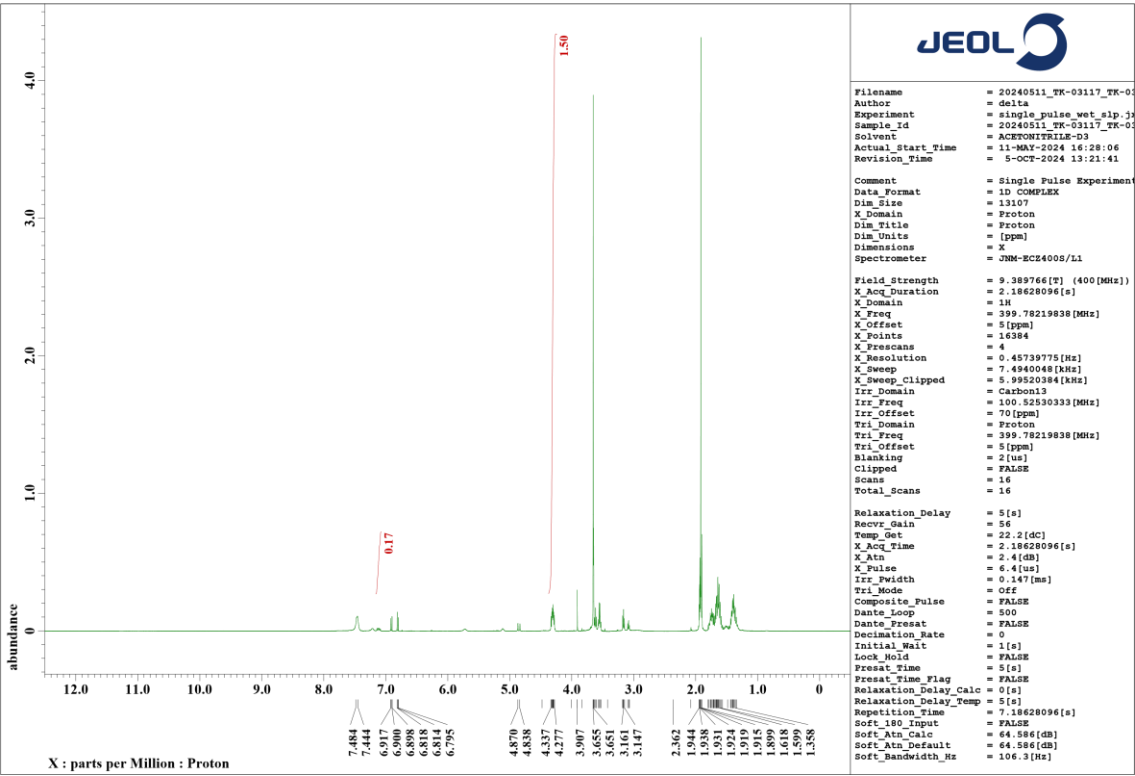

7-Lys·HCl (H<sub>2</sub>O, 48 h)

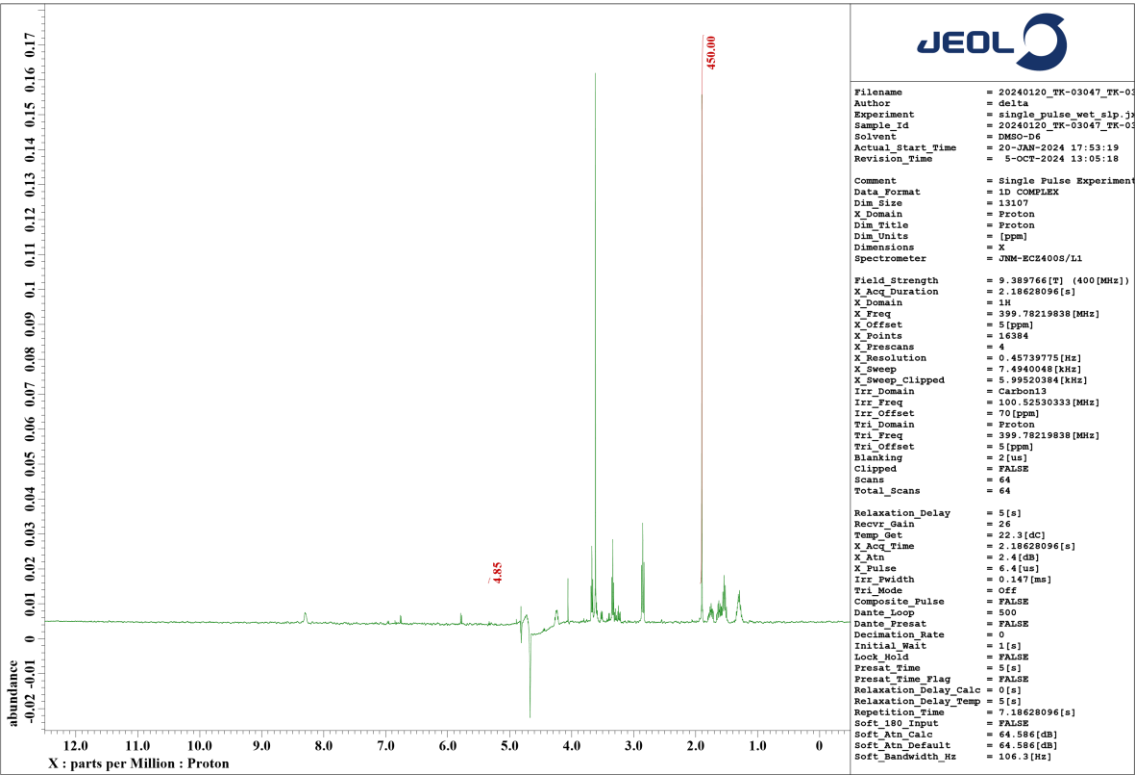

5-Lys·HCl (PBS, 48 h)

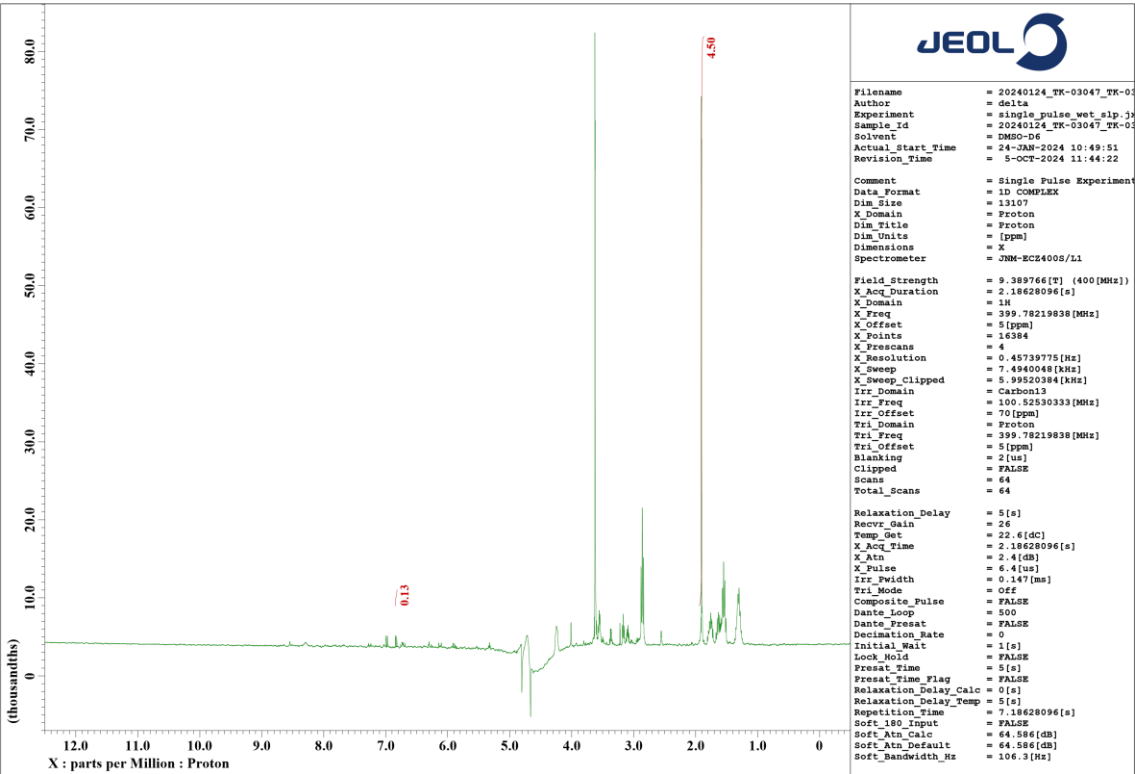

5-Lys·HCl (PBS, 48 h)

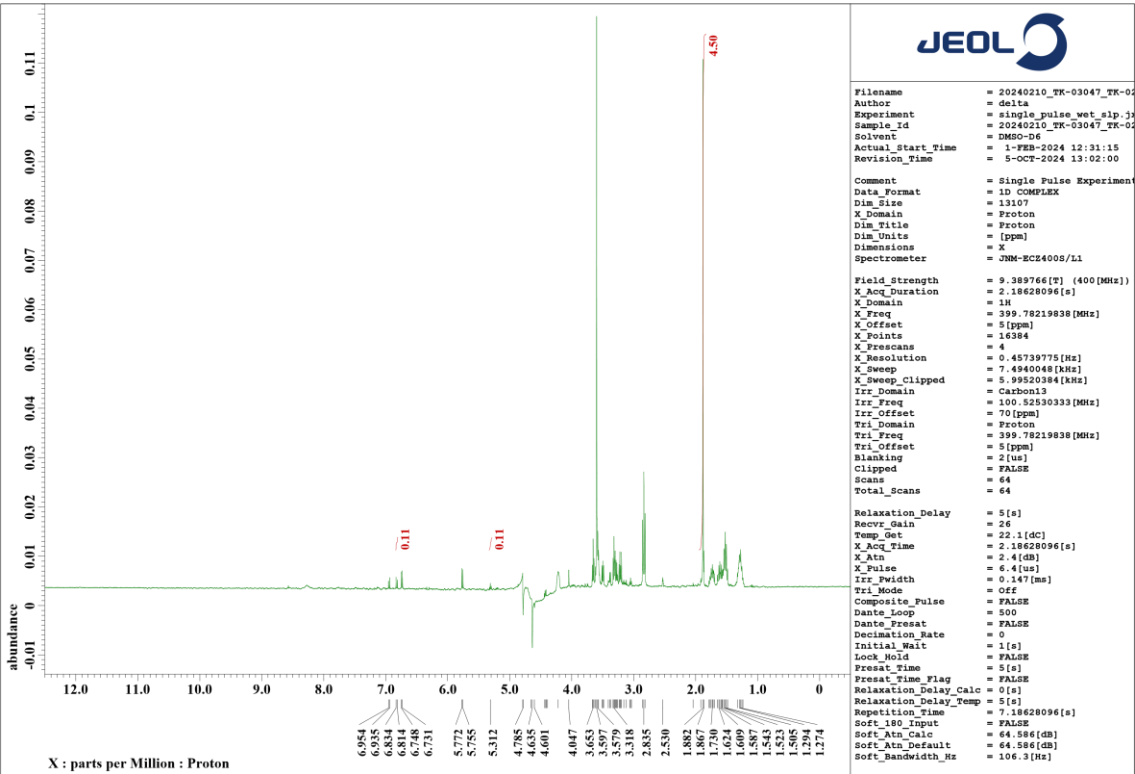

### The reversibility of the conjugate addition

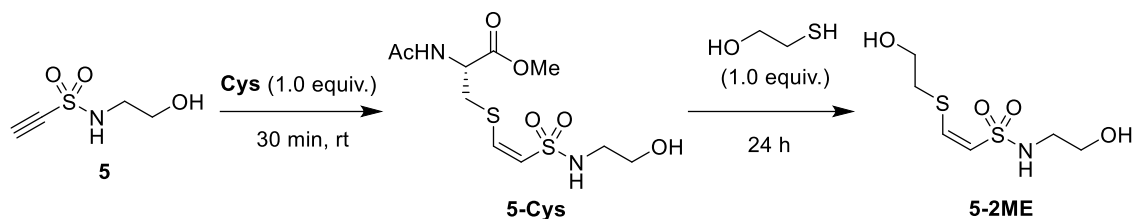

The **5** (300  $\mu$ L, 40 mM solution in PBS) and **Cys** (300  $\mu$ L, 40 mM solution in PBS) were added to the NMR tube and mixed by shaking up and down, then the foam was removed by ultrasound. The reaction mixture was allowed to stand at room temperature for 30 minutes. After, 2-mercaptoethanol (0.854  $\mu$ L, 1.0 equiv.) was added, and the mixture was shaken up and down again. Foam was removed by ultrasound. The reaction mixture was subsequently allowed to stand at room temperature or 37  $^{\circ}$ C for 24 hours. DMSO-*d*<sub>6</sub> (15  $\mu$ L) was added to the reaction mixture, and it was analyzed by NoD-NMR.

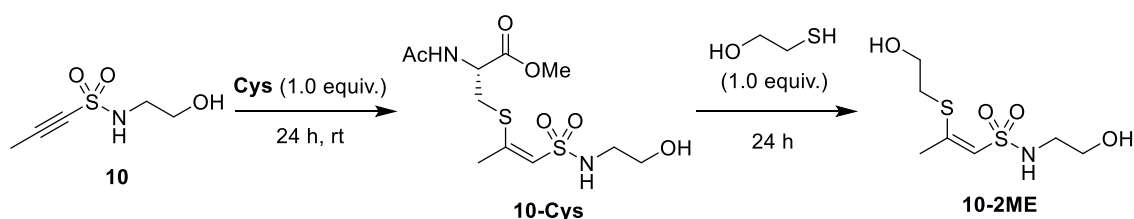

The **10** (300  $\mu$ L, 40 mM solution in PBS) and **Cys** (300  $\mu$ L, 40 mM solution in PBS) were added to the NMR tube and mixed by shaking up and down, then the foam was removed by ultrasound. The reaction mixture was allowed to stand at room temperature for 24 hours. After, 2-mercaptoethanol (0.854  $\mu$ L, 1.0 equiv.) was added, and the mixture was shaken up and down again. Foam was removed by ultrasound. The reaction mixture was subsequently allowed to stand at room temperature or 37  $^{\circ}$ C for 24 hours. DMSO-*d*<sub>6</sub> (15  $\mu$ L) was added to the reaction mixture, and it was analyzed by NoD-NMR.

**Table S2** The reversibility of the conjugate addition

| Entry | Sulfonamide | Temp. ( $^{\circ}$ C) | <b>Cys</b> adducts: <b>2-ME</b> adducts |
|-------|-------------|-----------------------|-----------------------------------------|
| 1     | 5           | rt                    | No reaction                             |
| 2     | 5           | 37                    | 72:28                                   |
| 3     | 10          | rt                    | No reaction                             |
| 4     | 10          | 37                    | 83:17                                   |

**Cys** adducts:**2-ME** adducts ratio by NMR

## Characterization Data

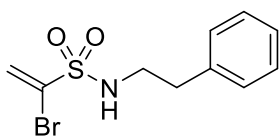

**1-Bromo-*N*-phenylethene-1-sulfonamide (1a):** Prepared as shown in general procedure 2; yellow oil; eluent (Hexane:EtOAc = 5:1, v/v); yield, 90%. FT-IR (ATR)  $\nu$  cm<sup>-1</sup>: 3303 (m), 3019 (w), 3028 (w), 2927 (w), 1604 (w), 1497 (w), 1455 (w), 1417 (w), 1337 (s), 1167 (s), 1095 (m), 1031 (w). <sup>1</sup>H-NMR (400 MHz, CDCl<sub>3</sub>)  $\delta$  7.35–7.20 (m, 5H), 6.83 (d,  $J$  = 2.8 Hz, 1H), 6.19 (d,  $J$  = 2.8 Hz, 1H), 4.59 (br, 1H), 3.33 (q,  $J$  = 6.8 Hz, 2H), 2.90 (t,  $J$  = 6.8 Hz, 2H). <sup>13</sup>C-NMR (101 MHz, CDCl<sub>3</sub>)  $\delta$  137.3, 128.9, 128.8, 128.4, 127.1, 127.0, 44.6, 35.8. LRMS (EI):  $m/z$  (%) 91 (81) [M – C<sub>3</sub>H<sub>5</sub>NO<sub>2</sub>SBr], 198 (base peak) [M – C<sub>7</sub>H<sub>7</sub>], 289 (3) [M]. HRMS (EI):  $m/z$  calculated for C<sub>10</sub>H<sub>12</sub>NO<sub>2</sub>SBr 288.97721; found 288.9782 [M]<sup>+</sup> (error +3.4 ppm).

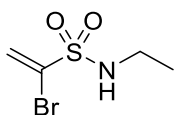

**1-Bromo-*N*-ethylethene-1-sulfonamide (1b):** Prepared as shown in general procedure 2; colorless oil; eluent (Hexane:EtOAc = 2:1, v/v); yield, 84%. FT-IR (NaCl)  $\nu$  cm<sup>-1</sup> : 3296 (s), 3113 (w), 2982 (m), 2939 (w), 2879 (w), 1604 (m), 1425 (s), 1333 (vs), 1165 (vs), 1093 (s), 949 (s), 860 (m), 783 (s), 600(s). <sup>1</sup>H-NMR (400 MHz, CDCl<sub>3</sub>)  $\delta$  6.86 (d,  $J$  = 2.9 Hz, 1H), 6.22 (d,  $J$  = 2.9 Hz, 1H), 4.58 (br, 1H), 3.13 (qd,  $J$  = 7.2, 5.6 Hz, 2H), 1.25 (t,  $J$  = 7.2 Hz, 3H). <sup>13</sup>C-NMR (101 MHz, CDCl<sub>3</sub>)  $\delta$  128.4, 127.3, 38.7, 15.1. LRMS (EI):  $m/z$  (%) 105 (21), [M – C<sub>2</sub>H<sub>6</sub>NO<sub>2</sub>S], 134 (5), [M – Br], 198 (95) [M – CH<sub>3</sub>], 213 (5) [M]. HRMS (EI):  $m/z$  calculated for C<sub>4</sub>H<sub>8</sub>NO<sub>2</sub>SBr 212.94529; found 212.9460 [M]<sup>+</sup> (error +0.5 ppm).

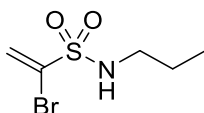

**1-Bromo-*N*-propylethene-1-sulfonamide (1c):** Prepared as shown in general procedure 2; colorless oil; eluent (Hexane:EtOAc = 4:1, v/v); yield, 89%. FT-IR (NaCl)  $\nu$  cm<sup>-1</sup>: 3300 (s), 3112 (w), 2968 (s), 2937 (m), 2877 (m), 1602 (m), 1423 (m), 1334 (s), 1245 (w), 1166 (s), 1092 (s), 1008 (m), 936 (m), 844 (w), 765 (m), 603 (m), 571 (w). <sup>1</sup>H-NMR (400 MHz, CDCl<sub>3</sub>)  $\delta$  6.85 (d,  $J$  = 2.9 Hz, 1H), 6.21 (d,  $J$  = 2.9 Hz, 1H), 4.71 (br, 1H), 3.03 (td,  $J$  = 7.2, 6.0 Hz, 2H), 1.62 (sext,  $J$  = 7.2 Hz, 2H), 0.97 (t,  $J$  = 7.2 Hz, 3H). <sup>13</sup>C-NMR (101 MHz, CDCl<sub>3</sub>)  $\delta$  128.3, 127.3, 45.3, 22.9, 11.1. LRMS (EI):  $m/z$  (%) 105

(12)  $[M - C_3H_8NO_2S]$ , 198 (98)  $[M - C_2H_5]$ , 227 (2)  $[M]$ . HRMS (EI):  $m/z$  calculated for  $C_5H_{10}NO_2SBr$  226.96156; found 226.9611  $[M]^+$  (error  $-2.1$  ppm).

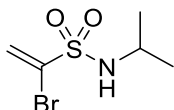

**1-Bromo-*N*-isopropylethene-1-sulfonamide (1d):** Prepared as shown in general procedure 2; off-white crystals; eluent (Hexane:EtOAc = 4:1, v/v); yield, 93%. FT-IR (KBr)  $\nu$   $cm^{-1}$ : 3312 (s), 3294 (s), 3107 (w), 3013 (w), 2980 (m), 2933 (w), 1600 (w), 1464 (w), 1431 (m), 1392 (w), 1362 (w), 1339 (m), 1311 (m), 1162 (m), 1127 (s), 1090 (m), 1019 (m), 953 (m), 902(m), 832 (w), 757 (w), 719 (w), 607 (s), 569 (m).  $^1H$ -NMR (400 MHz,  $CDCl_3$ )  $\delta$  6.86 (d,  $J = 2.9$  Hz, 1H), 6.18 (d,  $J = 2.9$  Hz, 1H), 4.59 (d,  $J = 6.0$  Hz, 1H), 3.54 (oct,  $J = 6.4$  Hz, 1H), 1.25 (d,  $J = 6.4$  Hz, 6H).  $^{13}C$ -NMR (101 MHz,  $CDCl_3$ )  $\delta$  128.3, 127.9, 47.0, 23.6. LRMS (EI):  $m/z$  (%) 105 (11)  $[M - C_3H_8NO_2S]$ , 212 (99)  $[M - CH_3]$ . HRMS (EI):  $m/z$  calculated for  $C_4H_7NO_2SBr$  211.93809; found 211.9379  $[M - CH_3]^+$  (error  $-0.7$  ppm).

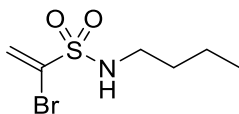

**1-Bromo-*N*-butylethene-1-sulfonamide (1e):** Prepared as shown in general procedure 2; yellow oil; eluent (Hexane:EtOAc = 4:1, v/v); yield, 90%. FT-IR (NaCl)  $\nu$   $cm^{-1}$ : 3298 (s), 3112 (w), 2960 (s), 2935 (s), 2873 (m), 1603 (m), 1465 (m), 1427 (m), 1334 (s), 1165 (s), 1093 (m), 1034 (w), 937 (w), 760 (w), 603 (m), 574 (w).  $^1H$ -NMR (400 MHz,  $CDCl_3$ )  $\delta$  6.85 (d,  $J = 2.9$  Hz, 1H), 6.21 (d,  $J = 2.9$  Hz, 1H), 4.69 (br, 1H), 3.05 (td,  $J = 6.7, 6.0$  Hz, 2H), 1.57 (quin,  $J = 7.6$  Hz, 2H), 1.39 (sext,  $J = 7.6$  Hz, 2H), 0.94 (t,  $J = 7.3$  Hz, 3H).  $^{13}C$ -NMR (101 MHz,  $CDCl_3$ )  $\delta$  128.4, 127.2, 43.3, 31.5, 19.7, 13.5. LRMS (FAB):  $m/z$  (%) 242 (base peak)  $[M + H]$ . HRMS (FAB):  $m/z$  calculated for  $C_6H_{13}NO_2SBr$  241.98449; found 241.9851  $[M + H]^+$  (error  $+0.2$  ppm).

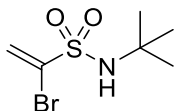

**1-Bromo-*N*-(tert-butyl)ethene-1-sulfonamide (1f):** Prepared as shown in general procedure 2; off-white crystals (cubic); eluent (Hexane:EtOAc = 4:1, v/v); yield, 92%. FT-IR (KBr)  $\nu$   $cm^{-1}$ : 3273 (s), 3116 (w), 3030 (w), 2974 (m), 2875 (w), 1879 (w), 1604 (m), 1473 (w), 1435 (m), 1395 (m), 1369 (m), 1354 (w), 1323 (s), 1234 (m), 1211 (w), 1154 (s), 1090 (m), 1045 (w), 1014 (s), 939 (s), 867 (m), 769 (m), 701 (w), 611 (s), 583 (s).  $^1H$ -NMR (400 MHz,  $CDCl_3$ )  $\delta$  6.85 (d,  $J = 2.9$  Hz, 1H), 6.12 (d,  $J$

= 2.9 Hz, 1H), 4.67 (br, 1H), 1.37 (s, 9H).  $^{13}\text{C}$ -NMR (101 MHz,  $\text{CDCl}_3$ )  $\delta$  131.2, 126.9, 55.4, 29.7. LRMS (EI):  $m/z$  (%) 226 (96)  $[\text{M} - \text{CH}_3]$ . HRMS (EI):  $m/z$  calculated for  $\text{C}_5\text{H}_9\text{NO}_2\text{SBr}$  225.95374; found 225.9542  $[\text{M} - \text{CH}_3]^+$  (error +2.0 ppm).

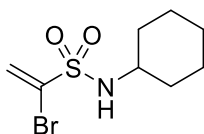

**1-Bromo-N-cyclohexylethene-1-sulfonamide (1g):** Prepared as shown in general procedure 2; off-white crystals; eluent (Hexane:EtOAc = 4:1, v/v); yield, 90%. FT-IR (KBr)  $\nu$   $\text{cm}^{-1}$ : 3245 (s), 3109 (m), 3012 (w), 2935 (s), 2853 (m), 1603 (w), 1442 (m), 1353 (w), 1334 (s), 1166 (s), 1145 (m), 1100 (m), 1080 (s), 999 (w), 941 (m), 191 (w), 890 (m), 844 (w), 768 (m), 728 (w), 612 (s), 558 (s).  $^1\text{H}$ -NMR (400 MHz,  $\text{CDCl}_3$ )  $\delta$  6.85 (d,  $J = 2.9$  Hz, 1H), 6.17 (d,  $J = 2.9$  Hz, 1H), 4.62 (d,  $J = 7.2$  Hz, 1H), 3.25–3.16 (m, 1H), 2.03–1.96 (m, 2H), 1.74–1.68 (m, 2H), 1.62–1.54 (m, 1H), 1.38–1.13 (m, 5H).  $^{13}\text{C}$ -NMR (101 MHz,  $\text{CDCl}_3$ )  $\delta$  128.6, 127.7, 53.4, 33.8, 25.1, 24.6. LRMS (EI):  $m/z$  (%) 98  $[\text{M} - \text{C}_2\text{H}_2\text{NO}_2\text{SBr}]$ , 224 (96)  $[\text{M} - \text{C}_3\text{H}_7]$ , 267 (21)  $[\text{M}]$ . HRMS (EI):  $m/z$  calculated for  $\text{C}_8\text{H}_{14}\text{NO}_2\text{SBr}$  266.99286; found 266.9936  $[\text{M}]^+$  (error +2.6 ppm).

Note. McLafferty rearrangement.

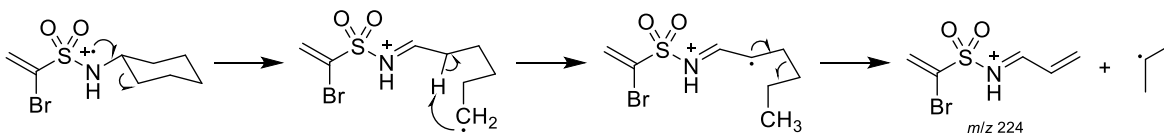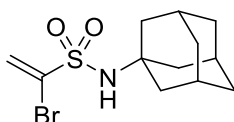

**N-((3s,5s,7s)-Adamantan-1-yl)-1-bromoethene-1-sulfonamide (1h):** Prepared as shown in general procedure 2; off-white crystals; recrystallization (1,4-dioxane); yield, 82%. FT-IR (NaCl)  $\nu$   $\text{cm}^{-1}$ : 3239 (s), 2955 (w), 2936 (m), 2903 (s), 2849 (w), 1604 (w), 1459 (m), 1450 (m), 1362 (m), 1346 (w), 1326 (s), 1254 (w), 1164 (s), 1120 (w), 1085 (m), 998 (m), 970 (w), 932 (m), 876 (w), 763 (m), 704 (w), 652 (w), 623 (m), 591 (m), 561 (m).  $^1\text{H}$ -NMR (400 MHz,  $\text{CDCl}_3$ )  $\delta$  6.85 (d,  $J = 2.9$  Hz, 1H), 6.10 (d,  $J = 2.9$  Hz, 1H), 4.54 (br, 1H), 2.09 (br, 3H), 1.95 (d,  $J = 3.0$  Hz, 6H), 1.65 (m, 6H).  $^{13}\text{C}$ -NMR (101 MHz,  $\text{CDCl}_3$ )  $\delta$  131.8, 126.6, 55.8, 42.6, 35.8, 29.5. LRMS (ESI):  $m/z$  (%) 342 (28)  $[\text{M} + \text{Na}]$ , 374 (96)  $[\text{M} + \text{MeOH} + \text{Na}]$ . HRMS (ESI):  $m/z$  calculated for  $\text{C}_{12}\text{H}_{18}\text{NO}_2\text{NaSBr}$  342.01393; found 342.01544  $[\text{M} + \text{Na}]^+$  (error +4.41 ppm).

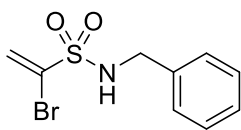

**N-Benzyl-1-bromoethene-1-sulfonamide (1i):** Prepared as shown in general procedure 2; white crystals; eluent (Hexane:EtOAc = 4:1, v/v); yield, 84%. FT-IR (KBr)  $\nu$  cm<sup>-1</sup>: 3275 (s), 3119 (w), 3031 (w), 2872 (w), 1605 (m), 1496 (m), 1456 (m), 1415 (s), 1355 (m), 1333 (s), 1180 (m), 1089 (m), 1042 (m), 940 (m), 901 (m), 823 (w), 812 (w), 764 (s), 702 (s), 609 (s). <sup>1</sup>H-NMR (400 MHz, CDCl<sub>3</sub>)  $\delta$  7.39–7.30 (m, 5H), 6.86 (d,  $J$  = 3.0 Hz, 1H), 6.21 (d,  $J$  = 3.0 Hz, 1H), 4.88 (br, 1H), 4.22 (d,  $J$  = 6.1 Hz, 2H). <sup>13</sup>C-NMR (101 MHz, CDCl<sub>3</sub>)  $\delta$  135.6, 128.8, 128.7, 128.3, 128.1, 127.1, 47.7. LRMS (EI):  $m/z$  (%) 91 (22) [M – C<sub>2</sub>H<sub>3</sub>NO<sub>2</sub>SBr], 106 (base peak) [M – C<sub>2</sub>H<sub>2</sub>O<sub>2</sub>SBr], 275 (1) [M]. HRMS (EI):  $m/z$  calculated for C<sub>9</sub>H<sub>10</sub>NO<sub>2</sub>SBr 274.96156; found 274.9611 [M]<sup>+</sup> (error –1.7 ppm).

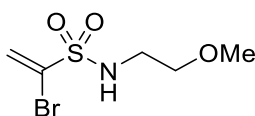

**1-Bromo-N-(2-methoxyethyl)ethene-1-sulfonamide (1j):** Prepared as shown in general procedure 2; colorless oil; eluent (Hexane:EtOAc = 2:1, v/v); yield, 81%. FT-IR (NaCl)  $\nu$  cm<sup>-1</sup>: 3605 (br), 3293 (br), 3112 (w), 2985 (w), 2932 (m), 2896 (m), 1603 (m), 1427 (m), 1390 (w), 1334 (s), 1197 (w), 1163 (s), 1124 (m), 1083 (s), 1025 (w), 945 (m), 867 (w), 801 (m), 759 (w), 600 (m). <sup>1</sup>H-NMR (400 MHz, CDCl<sub>3</sub>)  $\delta$  6.85 (d,  $J$  = 2.9 Hz, 1H), 6.21 (d,  $J$  = 2.9 Hz, 1H), 5.09 (br, 1H), 3.53 (dd,  $J$  = 11.0, 6.1 Hz, 2H), 3.38 (s, 3H), 3.23 (td,  $J$  = 5.6, 4.4 Hz, 2H). <sup>13</sup>C-NMR (101 MHz, CDCl<sub>3</sub>)  $\delta$  128.3, 127.3, 70.5, 58.9, 43.3. LRMS (FAB):  $m/z$  (%) 212 (93) [M – CH<sub>3</sub>O], 224 (base peak) [M + H]. HRMS (FAB):  $m/z$  calculated for C<sub>10</sub>H<sub>11</sub>NO<sub>3</sub>SBr 243.96375; found 243.9642 [M + H]<sup>+</sup> (error –0.5 ppm).

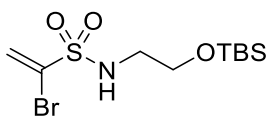

**1-Bromo-N-(2-((tert-butyldimethylsilyl)oxy)ethyl)ethene-1-sulfonamide (1k):** Prepared as shown in general procedure 2; colorless oil; eluent (Hexane:EtOAc = 9:1, v/v); yield, 77%. FT-IR (NaCl)  $\nu$  cm<sup>-1</sup>: 3304 (br), 3112 (w), 2953 (s), 2930 (s), 2884 (m), 2857 (s), 1604 (w), 1471 (m), 1407 (m), 1337 (s), 1256 (m), 1169 (s), 1093 (s), 1006 (w), 971 (m), 938 (m), 838 (s), 809 (m), 779 (m), 663 (w), 601 (m). <sup>1</sup>H-NMR (400 MHz, CDCl<sub>3</sub>)  $\delta$  6.85 (d,  $J$  = 2.9 Hz, 1H), 6.22 (d,  $J$  = 2.9 Hz, 1H), 5.00 (br, 1H), 3.76 (t,  $J$  = 5.3 Hz, 2H), 3.15 (q,  $J$  = 5.3 Hz, 2H), 0.90 (s, 9H), 0.08 (s, 6H). <sup>13</sup>C-NMR (101 MHz, CDCl<sub>3</sub>)  $\delta$  128.4, 127.1, 61.2, 45.7, 25.8, 18.2, –5.4. LRMS (ESI):  $m/z$  (%) 366 (95) [M + Na], 398 (34) [M + MeOH + Na], 709 (46) [2M + Na]. HRMS (ESI):  $m/z$  calculated for C<sub>10</sub>H<sub>22</sub>NO<sub>3</sub>NaSSiBr 366.01707; found 366.01732 [M + Na]<sup>+</sup> (error+0.67 ppm).

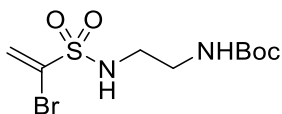

**tert-Butyl (2-((1-bromovinyl)sulfonamido)ethyl)carbamate (11):** Prepared as shown in general procedure 2; pale yellow oil; eluent (Hexane:EtOAc = 2:1, v/v); yield, 73%. FT-IR (NaCl)  $\nu$   $\text{cm}^{-1}$ : 3395 (m), 3310 (br), 3113 (w), 2979 (m), 2933 (w), 1691 (s), 1604 (w), 1519 (s), 1456 (w), 1394 (w), 1367 (m), 1336 (m), 1274 (w), 1254 (m), 1164 (s), 1099 (m), 939 (w), 915 (w), 733 (w).  $^1\text{H-NMR}$  (400 MHz,  $\text{CDCl}_3$ )  $\delta$  6.84 (d,  $J$  = 2.9 Hz, 1H), 6.21 (d,  $J$  = 2.9 Hz, 1H), 5.57 (br, 1H), 4.92 (br, 1H), 3.32 (ddd,  $J$  = 11.2, 5.7 Hz, 2H), 3.20–3.16 (m, 2H), 1.45 (s, 9H).  $^{13}\text{C-NMR}$  (101 MHz,  $\text{CDCl}_3$ )  $\delta$  156.8, 128.5, 127.1, 80.2, 44.4, 40.2, 28.4. LRMS (ESI):  $m/z$  (%) 295 (96) [ $\text{M} - \text{C}_4\text{H}_9 + \text{H}$ ], 327 (33) [ $\text{M} + \text{H}$ ], 351 (46) [ $\text{M} + \text{Na}$ ], 679 (16) [ $2\text{M} + \text{Na}$ ]. HRMS (ESI):  $m/z$  calculated for  $\text{C}_9\text{H}_{17}\text{NO}_4\text{NaSBr}$  350.99901; found 350.99946 [ $\text{M} + \text{Na}$ ] $^+$  (error +1.28 ppm).

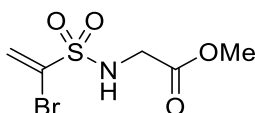

**Methyl ((1-bromovinyl)sulfonyl)glycinate (1m):** Prepared as shown in general procedure 2; colorless oil; eluent (Hexane:EtOAc = 3:1, v/v); yield, 21%. FT-IR (NaCl)  $\nu$   $\text{cm}^{-1}$ : 3624 (br), 3295 (br), 3114 (w), 3025 (w), 2956 (w), 1745 (s), 1603 (w), 1438 (m), 1339 (s), 1292 (w), 1221 (m), 1125 (m), 943 (w), 861 (m), 764 (w), 606 (m), 548 (w).  $^1\text{H-NMR}$  (400 MHz,  $\text{CDCl}_3$ )  $\delta$  6.86 (d,  $J$  = 3.0 Hz, 1H), 6.22 (d,  $J$  = 3.0 Hz, 1H), 5.29 (br, 1H), 3.91 (d,  $J$  = 5.2 Hz, 2H), 3.81 (s, 3H).  $^{13}\text{C-NMR}$  (101 MHz,  $\text{CDCl}_3$ )  $\delta$  168.9, 128.7, 126.8, 52.9, 44.5. LRMS (EI):  $m/z$  (%) 59 (10) [ $\text{M} - \text{C}_3\text{H}_5\text{NO}_2\text{SBr}$ ], 105 (64) [ $\text{M} - \text{C}_3\text{H}_6\text{NO}_4\text{S}$ ], 169 (8) [ $\text{M} - \text{C}_3\text{H}_6\text{NO}_2$ ], 178 (86) [ $\text{M} - \text{Br}$ ], 198 (base peak) [ $\text{M} - \text{C}_2\text{H}_3\text{O}_2$ ], 228 (28) [ $\text{M} - \text{CH}_2\text{O} + \text{H}$ ], 257 (1) [ $\text{M}$ ], 258 (2) [ $\text{M} + \text{H}$ ]. HRMS (EI):  $m/z$  calculated for  $\text{C}_5\text{H}_9\text{NO}_4\text{SBr}$  257.94302; found 257.9438 [ $\text{M} + \text{H}$ ] $^+$  (error +0.7 ppm).

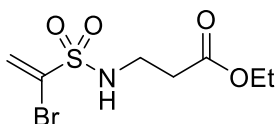

**Ethyl 3-((1-bromovinyl)sulfonamido)propanoate (1n):** Prepared as shown in general procedure 2; colorless oil; eluent (Hexane:EtOAc = 3:1, v/v); yield, 55%. FT-IR (NaCl)  $\nu$   $\text{cm}^{-1}$ : 3624 (br), 3292 (br), 3113 (w), 2984 (1604 (w), 1416 (m), 1378 (s), 1264 (m), 1193 (s), 1163 (s), 1096 (s), 1051 (m), 1026 (m), 943 (m), 819 (w), 787 (m), 600 (s), 569 (m).  $^1\text{H-NMR}$  (400 MHz,  $\text{CDCl}_3$ )  $\delta$  6.86 (d,  $J$  = 2.9 Hz, 1H), 6.21 (d,  $J$  = 2.9 Hz, 1H), 5.41 (br, 1H), 4.19 (q,  $J$  = 7.1 Hz, 2H), 3.34 (q,  $J$  = 6.1 Hz, 2H), 2.63 (t,  $J$  = 5.9 Hz, 2H), 1.29 (t,  $J$  = 7.1 Hz, 3H).  $^{13}\text{C-NMR}$  (101 MHz,  $\text{CDCl}_3$ )  $\delta$  172.0, 128.3, 127.5, 61.2,

39.2, 34.0, 14.2. LRMS (FAB):  $m/z$  (%) 198 (52) [ $M - C_4H_7O_2$ ], 242 (60) [ $M + H - C_2H_5O$ ], 286 [ $M + H$ ]. HRMS (FAB):  $m/z$  calculated for  $C_7H_{13}NO_4SBr$  285.97432; found 285.9736 [ $M + H$ ]<sup>+</sup> (error -4.4 ppm).

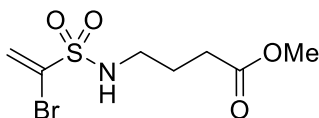

**Methyl 4-((1-bromovinyl)sulfonamido)butanoate (1o)**: Prepared as shown in general procedure 2; colorless oil; eluent (Hexane:EtOAc = 2:1, v/v); yield, 79%. FT-IR (ATR)  $\nu$  cm<sup>-1</sup>: 3300 (br), 3114 (w), 2954 (m), 1734 (s), 1603 (w), 1439 (m), 1337 (s), 1261 (w), 1206 (w), 1166 (s), 1096 (m). <sup>1</sup>H-NMR (400 MHz, CDCl<sub>3</sub>)  $\delta$  6.85 (d,  $J$  = 2.9 Hz, 1H), 6.21 (d,  $J$  = 2.9 Hz, 1H), 4.97 (t,  $J$  = 5.0 Hz, 1H), 3.70 (s, 3H), 3.13 (q,  $J$  = 6.5 Hz, 2H), 2.45 (t,  $J$  = 7.0 Hz, 2H), 1.92 (quin,  $J$  = 6.8 Hz, 2H). <sup>13</sup>C-NMR (101 MHz, CDCl<sub>3</sub>)  $\delta$  173.6, 128.5, 127.2, 51.9, 43.0, 30.9, 24.6. LRMS (ESI):  $m/z$  (%) 309 (95) [ $M + Na$ ]. HRMS (ESI):  $m/z$  calculated for  $C_7H_{12}NO_4NaSBr$  307.95681; found 307.95530 [ $M + Na$ ]<sup>+</sup> (error -4.92 ppm).

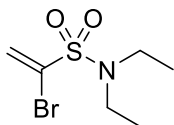

**1-Bromo-N,N-diethylethene-1-sulfonamide (1p)**: Prepared as shown in general procedure 2; colorless oil; eluent (Hexane:EtOAc = 4:1, v/v); yield, 96%. FT-IR (NaCl)  $\nu$  cm<sup>-1</sup>: 3111 (w), 2979 (m), 2938 (m), 2873 (w), 1601 (m), 1468 (m), 1385 (m), 1337 (s), 1298 (w), 1205 (s), 1181 (m), 1156 (s), 1090 (m), 1019 (s), 943 (m), 789 (m), 768 (m), 710 (w), 678 (m). <sup>1</sup>H-NMR (400 MHz, CDCl<sub>3</sub>)  $\delta$  6.80 (d,  $J$  = 2.7 Hz, 1H), 6.14 (d,  $J$  = 2.7 Hz, 1H), 3.37 (q,  $J$  = 7.2 Hz, 4H), 1.23 (t,  $J$  = 7.2 Hz, 6H). <sup>13</sup>C-NMR (101 MHz, CDCl<sub>3</sub>)  $\delta$  128.0, 127.6, 42.9, 14.3. LRMS (EI):  $m/z$  (%) 105 (11) [ $M - C_4H_{10}NO_2S$ ], 198 (8) [ $M - CH_3 - C_2H_4$ ], 226 (98) [ $M - CH_3$ ], 241 (8) [ $M$ ]. HRMS (EI):  $m/z$  calculated for  $C_6H_{12}NO_2SBr$  240.97721; found 240.9779 [ $M$ ]<sup>+</sup> (error +3.0 ppm).

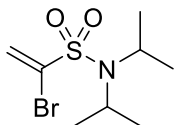

**1-Bromo-N,N-diisopropylethene-1-sulfonamide (1q)**: Prepared as shown in general procedure 2; off-white crystals; eluent (Hexane:EtOAc = 5:1, v/v); yield, 97%. FT-IR (KBr)  $\nu$  cm<sup>-1</sup>: 3106 (w), 2977 (m), 2937 (m), 2878 (w), 1598 (m), 1464 (m), 1409 (m), 1371 (m), 1331 (s), 1201 (s), 1169 (s), 1141 (s), 1122 (w), 983 (s), 942 (m), 887 (m), 760 (s), 708 (m), 657 (s), 587 (s), 568 (s), 529 (m). <sup>1</sup>H-NMR

(400 MHz, CDCl<sub>3</sub>)  $\delta$  6.83 (d,  $J$  = 2.6 Hz, 1H), 6.13 (d,  $J$  = 2.6 Hz, 1H), 3.79 (sep,  $J$  = 6.8 Hz, 2H), 1.35 (d,  $J$  = 6.8 Hz, 12H). <sup>13</sup>C-NMR (101 MHz, CDCl<sub>3</sub>)  $\delta$  129.7, 127.7, 49.6, 22.2.

LRMS (EI):  $m/z$  (%) 105 (7) [M – C<sub>6</sub>H<sub>14</sub>NO<sub>2</sub>S], 212 (base peak) [M – C<sub>4</sub>H<sub>9</sub>], 254 (46) [M – CH<sub>3</sub>], 269 (2) [M]. HRMS (EI):  $m/z$  calculated for C<sub>7</sub>H<sub>13</sub>NO<sub>2</sub>SBr 253.98504; found 253.9860 [M – CH<sub>3</sub>]<sup>+</sup> (error +3.6 ppm).

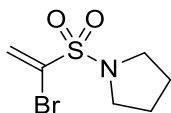

**1-((1-Bromovinyl)sulfonyl)pyrrolidine (1r):** Prepared as shown in general procedure 2; pale yellow crystals; eluent (Hexane:EtOAc = 4:1, v/v); yield, 92%. FT-IR (NaCl)  $\nu$  cm<sup>-1</sup>: 3110 (w), 2979 (m), 2888 (m), 1600 (m), 1459 (w), 1343 (s), 1241 (m), 1203 (s), 1160 (s), 1098 (s), 1065 (s), 1014 (s), 938 (m), 777 (s), 698 (w), 615 (s), 573 (s), 504 (m). <sup>1</sup>H-NMR (400 MHz, CDCl<sub>3</sub>)  $\delta$  6.80 (d,  $J$  = 2.7 Hz, 1H), 6.21 (d,  $J$  = 2.7 Hz, 1H), 3.49–3.43 (m, 4H), 2.02–1.94 (m, 4H). <sup>13</sup>C-NMR (101 MHz, CDCl<sub>3</sub>)  $\delta$  128.6, 125.5, 48.9, 25.9. LRMS (EI):  $m/z$  (%) 70 (base peak) [M – C<sub>2</sub>H<sub>2</sub>O<sub>2</sub>SBr], 105 (23) [M – C<sub>4</sub>H<sub>8</sub>NO<sub>2</sub>S], 328 (40) [M – H], 329 (33) [M]. HRMS (EI):  $m/z$  calculated for C<sub>6</sub>H<sub>10</sub>NO<sub>2</sub>S<sup>79</sup>Br 238.96156; found 238.9591 [M]<sup>+</sup> (error –10.1 ppm). HRMS (EI):  $m/z$  calculated for C<sub>6</sub>H<sub>10</sub>NO<sub>2</sub>S<sup>81</sup>Br 240.95952; found 240.9591 [M]<sup>+</sup> (error –1.6 ppm).

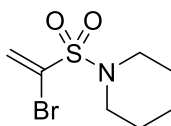

**1-((1-Bromovinyl)sulfonyl)piperidine (1s):** Prepared as shown in general procedure 2; pale yellow crystals; eluent (Hexane:EtOAc = 4:1, v/v); yield, 92%. FT-IR (NaCl)  $\nu$  cm<sup>-1</sup>: 3110 (w), 2941 (s), 2857 (s), 1600 (m), 1453 (m), 1362 (vs), 1340 (vs), 1279 (m), 1219 (m), 1170 (vs), 1092 (s), 1051 (s), 945 (vs), 855 (w), 836 (w), 770 (s), 712 (s), 596 (vs). <sup>1</sup>H-NMR (400 MHz, CDCl<sub>3</sub>)  $\delta$  6.77 (dd,  $J$  = 2.8, 0.4 Hz, 1H), 6.20 (d,  $J$  = 2.8 Hz, 1H), 3.31 (t,  $J$  = 5.3 Hz, 4H), 1.70–1.56 (m, 6H). <sup>13</sup>C-NMR (101 MHz, CDCl<sub>3</sub>)  $\delta$  131.7, 127.8, 47.8, 25.6. LRMS (EI):  $m/z$  (%) 83 (base peak) [M – C<sub>2</sub>H<sub>3</sub>O<sub>2</sub>SBr], 84 (35) [M – C<sub>2</sub>H<sub>2</sub>O<sub>2</sub>SBr], 105 (12) [M – C<sub>5</sub>H<sub>10</sub>NO<sub>2</sub>S], 212 (13) [M – C<sub>3</sub>H<sub>5</sub>], 252 (54) [M – H], 253 (59) [M]. HRMS (EI):  $m/z$  calculated for C<sub>7</sub>H<sub>12</sub>NO<sub>2</sub>S<sup>79</sup>Br 252.97721; found 252.9735 [M]<sup>+</sup> (error -14.8 ppm). HRMS (EI):  $m/z$  calculated for C<sub>7</sub>H<sub>12</sub>NO<sub>2</sub>S<sup>81</sup>Br 254.97517; found 254.9761 [M]<sup>+</sup> (error +3.7 ppm).

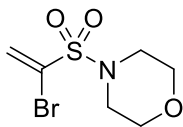

**4-((1-Bromovinyl)sulfonyl)morpholine (1t):** Prepared as shown in general procedure 2; colorless crystals; eluent (Hexane:EtOAc = 4:1, v/v); yield, 90%. FT-IR (NaCl)  $\nu$   $\text{cm}^{-1}$ : 3110 (w), 2971 (w), 2920 (w), 2861 (w), 1600 (w), 1451 (m), 1348 (s), 1300 (w), 1262 (m), 1168 (s), 1114 (s), 1169 (m), 1014 (w), 954 (s), 848 (w), 774 (m), 714 (m), 613 (s), 530 (s).  $^1\text{H}$ -NMR (400 MHz,  $\text{CDCl}_3$ )  $\delta$  6.82 (d,  $J$  = 2.9 Hz, 1H), 6.27 (d,  $J$  = 2.9 Hz, 1H), 3.78–3.75 (m, 4H), 3.38–3.35 (m, 4H).  $^{13}\text{C}$ -NMR (101 MHz,  $\text{CDCl}_3$ )  $\delta$  129.2, 125.2, 66.6, 46.5. LRMS (EI):  $m/z$  (%) 85 (base peak) [ $\text{M} - \text{C}_2\text{H}_2\text{O}_2\text{SBr}$ ], 105 (12) [ $\text{M} - \text{C}_4\text{H}_8\text{NO}_3\text{S}$ ], 212 (21) [ $\text{M} - \text{C}_2\text{H}_4\text{O} + \text{H}$ ], 255 (27) [ $\text{M}$ ]. HRMS (EI):  $m/z$  calculated for  $\text{C}_6\text{H}_{10}\text{NO}_3\text{SBr}$  254.95648; found 254.9572 [ $\text{M}$ ] $^+$  (error +2.7 ppm).

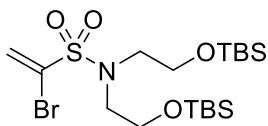

**1-Bromo-*N,N*-bis(2-((*tert*-butyldimethylsilyl)oxy)ethyl)ethene-1-sulfonamide (1u):** Prepared as shown in general procedure 2; colorless oil; eluent (Hexane:EtOAc = 19:1, v/v); yield, 77%. FT-IR (ATR)  $\nu$   $\text{cm}^{-1}$ : 3114 (m), 2958 (s), 2887 (s), 2860 (s), 1603 (w), 1472 (m), 1362 (m), 1258 (m), 1167 (m), 1111 (m), 1006 (m), 937 (m), 840 (m), 810 (m), 780 (m).  $^1\text{H}$ -NMR (400 MHz,  $\text{CDCl}_3$ )  $\delta$  6.82 (d,  $J$  = 2.8 Hz, 1H), 6.15 (d,  $J$  = 2.8 Hz, 1H), 3.79 (t,  $J$  = 6.3 Hz, 4H), 3.47 (t,  $J$  = 6.2 Hz, 4H), 0.89 (s, 18H), 0.07 (s, 12H).  $^{13}\text{C}$ -NMR (101 MHz,  $\text{CDCl}_3$ )  $\delta$  127.8, 127.5, 77.3, 77.2, 77.0, 76.7, 62.1, 52.1, 25.9, 18.5, 18.2, 17.9, -5.4. LRMS (EI):  $m/z$  (%) 444 (base peak) [ $\text{M} - \text{C}_4\text{H}_9$ ], 486 (13) [ $\text{M} - \text{CH}_3$ ]. HRMS (EI):  $m/z$  calculated for  $\text{C}_{17}\text{H}_{37}\text{NO}_4\text{SiSBr}$  486.11652; found 486.1178 [ $\text{M} - \text{CH}_3$ ] $^+$  (error +2.6 ppm).

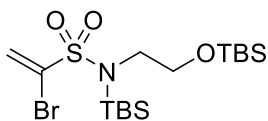

**1-Bromo-*N*-(*tert*-butyldimethylsilyl)-*N*-(2-((*tert*-butyldimethylsilyl)oxy)ethyl)ethene-1-sulfonamide (1v):** Prepared as shown in general procedure 2; colorless oil; eluent (Hexane:EtOAc = 19:1, v/v); yield, 47%. FT-IR (NaCl)  $\nu$   $\text{cm}^{-1}$ : 3112 (w), 2955 (s), 2931 (s), 2886 (s), 2859 (s), 2710 (w), 1602 (m), 1472 (s), 1407 (w), 1392 (m), 1338 (s), 1257 (s), 1162 (s), 1092 (s), 1038 (m), 1006 (m), 904 (s), 840 (s), 825 (s), 778 (s), 707 (w), 687 (m), 609 (s).  $^1\text{H}$ -NMR (400 MHz,  $\text{CDCl}_3$ )  $\delta$  6.90 (d,  $J$  = 2.7 Hz, 1H), 6.20 (d,  $J$  = 2.7 Hz, 1H), 3.72 (t,  $J$  = 7.6 Hz, 2H), 3.27 (t,  $J$  = 7.6 Hz, 2H), 1.01 (s, 9H), 0.88 (s, 9H), 0.39 (s, 6H), 0.05 (s, 6H).  $^{13}\text{C}$ -NMR (101 MHz,  $\text{CDCl}_3$ )  $\delta$  129.2, 128.9, 61.5, 49.0, 27.3,

25.9, 19.7, 18.3, -2.9, -5.3. LRMS (EI):  $m/z$  (%) 400 (32) [M - C<sub>4</sub>H<sub>9</sub>], 442 (2) [M - CH<sub>3</sub>]. HRMS (EI):  $m/z$  calculated for C<sub>15</sub>H<sub>33</sub>NO<sub>3</sub>Si<sub>2</sub>SBr 442.09031; found 442.0913 [M - CH<sub>3</sub>]<sup>+</sup> (error +2.3 ppm).

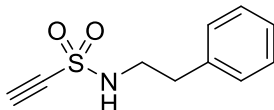

**N-Phenethylethynylsulfonamide (2a):** Prepared as shown in general procedure 3A; yellow oil; eluent (Hexane:EtOAc = 2:1, v/v); yield, 82%. UV (abs)  $\lambda_{\text{max}}$ : 206 nm (5%v/v MeCN in Water). FT-IR (ATR)  $\nu$  cm<sup>-1</sup>: 3636 (m), 3269 (br), 3030 (w), 2933 (w), 2072 (s), 1604 (w), 1497 (w), 1445 (m), 1423 (m), 1353 (s), 1172 (s), 1075 (m). <sup>1</sup>H-NMR (400 MHz, CDCl<sub>3</sub>)  $\delta$  7.36–7.20 (m, 5H), 4.74 (br, 1H), 3.49 (q,  $J$  = 6.8 Hz, 2H), 3.25 (s, 1H), 2.95 (t,  $J$  = 6.8 Hz, 2H). <sup>13</sup>C-NMR (101 MHz, CDCl<sub>3</sub>)  $\delta$  137.2, 128.9, 128.8, 127.1, 78.3, 76.8, 44.6, 35.3. LRMS (EI):  $m/z$  (%) 91 (66) [M - C<sub>3</sub>H<sub>4</sub>NO<sub>2</sub>S], 118 (base peak) [M - C<sub>7</sub>H<sub>7</sub>], 209 (6) [M]. HRMS (EI):  $m/z$  calculated for C<sub>10</sub>H<sub>11</sub>NO<sub>2</sub>S 209.05105; found 209.0512 [M]<sup>+</sup> (error +0.6 ppm).

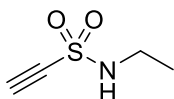

**N-Ethylethynylsulfonamide (2b):** Prepared as shown in general procedure 3A; yellow oil; eluent (Hexane:EtOAc = 2:1, v/v); yield, 91%. FT-IR (NaCl)  $\nu$  cm<sup>-1</sup>: 3627 (w), 3265 (br), 2986 (m), 2942 (w), 2882 (w), 2071 (s), 1427 (s), 1340 (s), 1169 (s), 1062 (m), 958 (m), 868 (m), 777 (m), 695 (s), 573 (s). <sup>1</sup>H-NMR (400 MHz, CDCl<sub>3</sub>)  $\delta$  4.71 (br, 1H), 3.30 (qd,  $J$  = 7.2, 6.0 Hz, 2H), 3.27 (s, 1H), 1.30 (t,  $J$  = 7.2 Hz, 3H). <sup>13</sup>C-NMR (101 MHz, CDCl<sub>3</sub>)  $\delta$  78.4, 76.6, 38.8, 14.7. LRMS (EI):  $m/z$  (%) 44 (2) [M - C<sub>2</sub>H<sub>2</sub>O<sub>2</sub>S], 89 (13) [M - C<sub>2</sub>H<sub>6</sub>N], 118 (base peak) [M - CH<sub>3</sub>], 133 (4) [M]. HRMS (EI):  $m/z$  calculated for C<sub>4</sub>H<sub>7</sub>NO<sub>2</sub>S 133.01975; found 133.0198 [M]<sup>+</sup> (error +0.4 ppm).

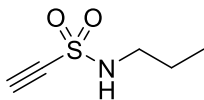

**N-Propylethynylsulfonamide (2c):** Prepared as shown in general procedure 3A; yellow oil; eluent (Hexane:EtOAc = 2:1, v/v); yield, 82%. FT-IR (NaCl)  $\nu$  cm<sup>-1</sup>: 3269 (br), 2972 (m), 2939 (m), 2880 (m), 2071 (s), 1426 (m), 1342 (s), 1169 (s), 1074 (m), 1008 (w), 913 (m), 843 (w), 696 (s). <sup>1</sup>H-NMR (400 MHz, CDCl<sub>3</sub>)  $\delta$  4.82 (br, 1H), 3.27 (s, 1H), 3.19 (ddd,  $J$  = 7.2, 6.4 Hz, 2H), 1.67 (sext,  $J$  = 7.2 Hz, 2H), 0.99 (t,  $J$  = 7.2 Hz, 3H). <sup>1</sup>H-NMR (400 MHz, DMSO-*d*<sub>6</sub>)  $\delta$  8.34 (t,  $J$  = 5.5 Hz, 1H), 5.74, 4.98 (s, 1H), 2.93 (td,  $J$  = 7.0, 5.7 Hz, 2H), 1.51 (sext,  $J$  = 7.3 Hz, 2H), 0.88 (t,  $J$  = 7.4 Hz, 3H). <sup>13</sup>C-NMR (101 MHz, CDCl<sub>3</sub>)  $\delta$  78.4, 76.6, 45.4, 22.5, 11.1. LRMS (EI):  $m/z$  (%) 89 (6) [M - C<sub>3</sub>H<sub>8</sub>N], 118

(base peak)  $[M - C_2H_5]$ , 147 (1)  $[M]$ . HRMS (EI):  $m/z$  calculated for  $C_5H_9NO_2S$  147.03540; found 147.0355  $[M]^+$  (error +0.7 ppm).

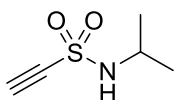

**N-Isopropylethynylsulfonamide (2d):** Prepared as shown in general procedure 3A; yellow oil; eluent (Hexane:EtOAc = 2:1, v/v); yield, 82%. UV (abs)  $\lambda_{max}$ : < 220 nm (5%v/v MeCN in Water). FT-IR (NaCl)  $\nu$   $cm^{-1}$ : 3260 (br), 3978 (m), 2936 (w), 2879 (w), 2071 (s), 1428 (m), 1396 (s), 1372 (m), 1335 (m), 1232 (w), 1206 (w), 1158 (s), 1043 (w), 1007 (m), 931 (w), 865 (w), 758 (w), 698 (s).  $^1H$ -NMR (400 MHz,  $CDCl_3$ )  $\delta$  4.71 (s, 1H), 3.76 (oct,  $J$  = 7.2, 6.8 Hz, 1H), 3.26 (s, 1H), 1.31 (d,  $J$  = 6.4 Hz, 6H).  $^{13}C$ -NMR (101 MHz,  $CDCl_3$ )  $\delta$  79.5, 76.1, 47.3, 23.3. LRMS (EI):  $m/z$  (%) 89 (6)  $[M - C_2HO_2S]$ , 132 (base peak)  $[M - CH_3]$ , 146 (0.6)  $[M - H]$ , 147(0.4)  $[M]$ . HRMS (EI):  $m/z$  calculated for  $C_5H_9NO_2S$  147.03540; found 147.0354  $[M]^+$  (error +0.3 ppm).

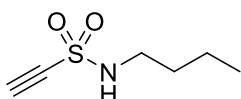

**N-Butylethynylsulfonamide (2e):** Prepared as shown in general procedure 3A; yellow oil; eluent (Hexane:EtOAc = 3:1, v/v); yield, 87%. FT-IR (ATR)  $\nu$   $cm^{-1}$ : 3260 (br), 2962 (w), 2936 (w), 2875 (w), 2070 (m), 1465 (w), 1425 (m), 1341 (s), 1165 (s), 1119 (w), 1078 (m).  $^1H$ -NMR (400 MHz,  $CDCl_3$ )  $\delta$  4.81 (br, 1H), 3.27 (s, 1H), 3.22 (ddd,  $J$  = 6.0, 7.2 Hz, 2H), 1.62 (quin,  $J$  = 7.6 Hz, 2H), 1.41 (sext,  $J$  = 7.2 Hz, 2H), 0.95 (t,  $J$  = 7.2 Hz, 3H).  $^{13}C$ -NMR (101 MHz,  $CDCl_3$ )  $\delta$  78.3, 76.7, 43.4, 31.1, 19.7, 13.5. LRMS (FAB):  $m/z$  (%) 74 (49)  $[M + H - C_2HO_2S]$ , 162 (40)  $[M + H]$ , 194 (36)  $[M + C_3H_8O_2S - C_3H_7O_2]$ , 270 (base peak)  $[M + C_3H_8O_2S + H]$ . HRMS (FAB):  $m/z$  calculated for  $C_6H_{12}NO_2S$  162.05833; found 162.0590  $[M + H]^+$  (error +0.7 ppm).

Note:

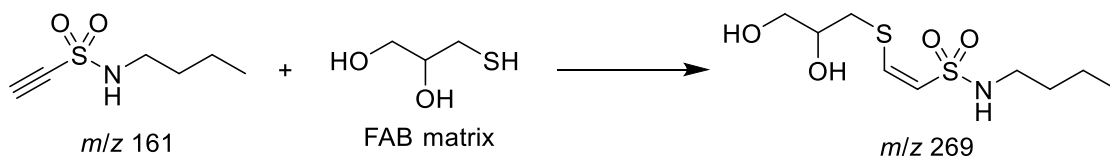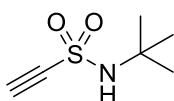

***N*-(*tert*-Butyl)ethynesulfonamide (2f):** Prepared as shown in general procedure 3A; off-white crystals; eluent (Hexane:EtOAc = 3:1, v/v); yield, 92%. FT-IR (NaCl)  $\nu$  cm<sup>-1</sup>: 3279 (br), 2979 (m), 2936 (w), 2874 (w), 2071 (s), 1428 (m), 1395 (s), 1372 (m), 1342 (s), 1232 (w), 1206 (w), 1158 (s), 1043 (w), 1007 (m), 931 (w), 865 (w), 758 (w), 698 (s), 595 (m). <sup>1</sup>H-NMR (400 MHz, CDCl<sub>3</sub>)  $\delta$  4.87 (br, 1H), 3.24 (s, 1H), 1.45 (s, 9H). <sup>13</sup>C-NMR (101 MHz, CDCl<sub>3</sub>)  $\delta$  81.3, 75.4, 56.1, 29.8. LRMS (EI):  $m/z$  (%) 146 (base peak) [M – CH<sub>3</sub>]. HRMS (EI):  $m/z$  calculated for C<sub>5</sub>H<sub>8</sub>NO<sub>2</sub>S 146.02757; found 146.0275 [M – CH<sub>3</sub>]<sup>+</sup> (error –0.9 ppm).

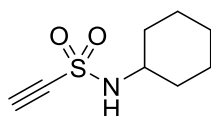

***N*-Cyclohexylethynesulfonamide (2g):** Prepared as shown in general procedure 3A; off-white crystals; eluent (Hexane:EtOAc = 3:1, v/v); yield, 93%. UV (abs)  $\lambda_{\text{max}}$ : < 220 nm (5%v/v MeCN in Water). <sup>1</sup>H-NMR (400 MHz, CDCl<sub>3</sub>)  $\delta$  4.76 (d,  $J$  = 6.2 Hz, 1H), 3.50–3.41 (m, 1H), 3.25 (s, 1H), 2.11–2.05 (m, 2H), 1.78–1.73 (m, 2H), 1.63–1.57 (m, 1H), 1.43–1.15 (m, 5H). <sup>13</sup>C-NMR (101 MHz, CDCl<sub>3</sub>)  $\delta$  79.7, 75.9, 53.7, 33.5, 25.1, 24.5. LRMS (EI):  $m/z$  (%) 98 (19) [M – C<sub>2</sub>HO<sub>2</sub>S], 144 (base peak) [M – C<sub>3</sub>H<sub>7</sub>], 187 (14) [M]. HRMS (EI):  $m/z$  calculated for C<sub>8</sub>H<sub>13</sub>NO<sub>2</sub>S 187.06670; found 187.0669 [M]<sup>+</sup> (error +1.0 ppm).

Note:

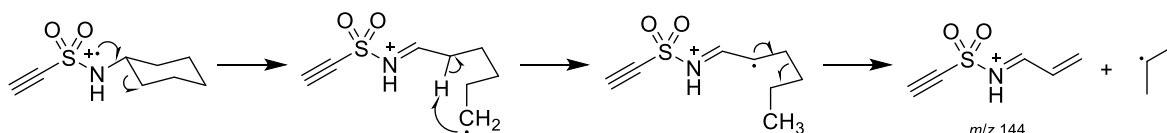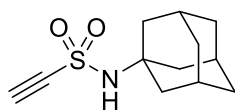

***N*-((3*s*,5*s*,7*s*)-Adamantan-1-yl)ethynesulfonamide (2h):** Prepared as shown in general procedure 3A; white crystals; eluent (Hexane:EtOAc = 4:1, v/v); yield, 65%. FT-IR (KBr)  $\nu$  cm<sup>-1</sup>: 3325 (s), 3229 (s), 2908 (s), 2888 (m), 2849 (m), 2067 (s), 1455 (w), 1424 (s), 1369 (s), 1353 (m), 1334 (s), 1321 (m), 1266 (w), 1155 (s), 1114 (w), 1006 (s), 972 (m), 886 (m), 746 (m), 723 (m), 694 (s), 561 (s). <sup>1</sup>H-NMR (400 MHz, CDCl<sub>3</sub>)  $\delta$  4.77 (br, 1H), 3.24 (s, 1H), 2.13 (br, 3H), 2.04 (d,  $J$  = 3.0 Hz, 6H), 1.71–1.64 (m, 6H). <sup>13</sup>C-NMR (101 MHz, CDCl<sub>3</sub>)  $\delta$  81.8, 75.3, 56.6, 42.7, 35.8, 29.5. LRMS (EI):  $m/z$  (%) 135 (83) [M – C<sub>2</sub>H<sub>2</sub>NO<sub>2</sub>S], 239 (37) [M]. HRMS (EI):  $m/z$  calculated for C<sub>12</sub>H<sub>17</sub>NO<sub>2</sub>S 239.09800; found 239.0976 [M]<sup>+</sup> (error –1.8 ppm).

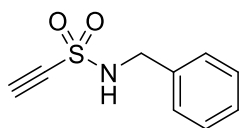

**N-Benzylethynylsulfonamide (2i):** Prepared as shown in general procedure 3A; colorless crystals; eluent (Hexane:EtOAc = 4:1, v/v); yield, 88%. FT-IR (NaCl)  $\nu$   $\text{cm}^{-1}$ : 3246 (w), 2946 (w), 2856 (w), 2063 (m), 1455 (w), 1366 (s), 1348 (s), 1318 (w), 1280 (w), 1214 (w), 1172 (s), 1149 (m), 1099 (w), 1055 (m), 1029 (w), 736 (s), 661 (s).  $^1\text{H}$ -NMR (400 MHz,  $\text{CDCl}_3$ )  $\delta$  7.41–7.32 (m, 5H), 5.01 (br, 1H), 4.38 (d,  $J$  = 6.1 Hz, 2H), 3.29 (s, 1H).  $^{13}\text{C}$ -NMR (101 MHz,  $\text{CDCl}_3$ )  $\delta$  135.1, 128.9, 128.4, 128.1, 78.2, 77.1, 47.8. LRMS (EI):  $m/z$  (%) 77 (55) [ $\text{M} - \text{C}_3\text{H}_4\text{NO}_2\text{S}$ ], 91 (50) [ $\text{M} - \text{C}_2\text{H}_2\text{NO}_2\text{S}$ ], 104 (base peak) [ $\text{M} - \text{C}_7\text{H}_7$ ], 195 (40) [ $\text{M}$ ]. HRMS (EI):  $m/z$  calculated for  $\text{C}_9\text{H}_9\text{NO}_2\text{S}$  195.03540; found 195.0349 [ $\text{M}$ ] $^+$  (error –2.7 ppm).

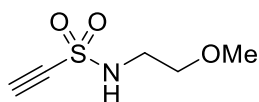

**N-(2-Methoxyethyl)ethynylsulfonamide (2j):** Prepared as shown in general procedure 3A (The solvent used is Et<sub>2</sub>O instead of THF); colorless oil; eluent (Hexane:EtOAc = 3:2, v/v); yield, 77%. FT-IR (NaCl)  $\nu$   $\text{cm}^{-1}$ : 3615 (br), 3255 (s), 2988 (w), 2935 (m), 2898 (m), 2839 (w), 2069 (s), 1628 (w), 1428 (s), 1391 (m), 1349 (s), 1241 (w), 1197 (m), 1169 (s), 1124 (s), 1081 (s), 1027 (m), 964 (m), 870 (w), 798 (w), 700 (s).  $^1\text{H}$ -NMR (400 MHz,  $\text{CDCl}_3$ )  $\delta$  5.30 (s, 1H), 3.59 (dd,  $J$  = 5.3, 4.7 Hz, 2H), 3.39 (s, 3H), 3.38 (td,  $J$  = 5.8, 4.9 Hz, 2H), 3.29 (s, 1H).  $^{13}\text{C}$ -NMR (101 MHz,  $\text{CDCl}_3$ )  $\delta$  78.2, 76.9, 69.8, 58.9, 43.4. LRMS (FAB):  $m/z$  (%) 164 (50) [ $\text{M} + \text{H}$ ], 196 (22) [ $\text{M} + \text{C}_3\text{H}_8\text{O}_2\text{S} - \text{C}_3\text{H}_7\text{O}_2$ ], 272 (base peak) [ $\text{M} + \text{C}_3\text{H}_8\text{O}_2\text{S} + \text{H}$ ]. HRMS (FAB):  $m/z$  calculated for  $\text{C}_5\text{H}_{11}\text{NO}_3\text{S}$  164.03759; found 164.0376 [ $\text{M} + \text{H}$ ] $^+$  (error –3.6 ppm).

Note.

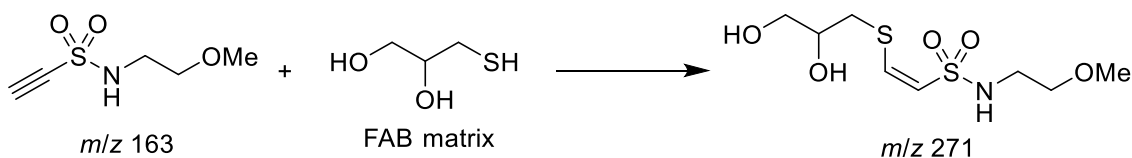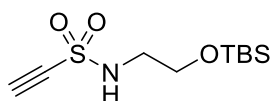

**N-(2-((*tert*-Butyldimethylsilyl)oxy)ethyl)ethynylsulfonamide (2k):** Prepared as shown in general procedure 3A (The solvent used is Et<sub>2</sub>O instead of THF, and saturated citric acid aqueous solution

instead of 5 M HCl aqueous solution.); colorless oil; eluent (Hexane:EtOAc = 5:1, v/v); yield, 71%. FT-IR (NaCl)  $\nu$  cm<sup>-1</sup>: 3157 (s), 2954 (s), 2930 (s), 2884 (m), 2858 (s), 2070 (s), 1471 (m), 1411 (m), 1355 (s), 1257 (s), 1173 (s), 1117 (s), 1087 (s), 978 (m), 939 (w), 838 (s), 810 (m), 780 (s), 700 (m), 582 (w). <sup>1</sup>H-NMR (400 MHz, CDCl<sub>3</sub>)  $\delta$  5.12 (br, 1H), 3.82–3.80 (m, 2H), 3.34–3.30 (m, 2H), 3.28 (s, 1H), 0.90 (s, 9H), 0.09 (s, 6H). <sup>13</sup>C-NMR (101 MHz, CDCl<sub>3</sub>)  $\delta$  78.3, 76.8, 60.8, 45.7, 25.8, 18.3, -5.4. LRMS (ESI):  $m/z$  (%) 286 (67) [M + Na], 318(44) [M + MeOH + Na], 336 (base peak) [M + H<sub>2</sub>O + MeOH + Na], 549 (24) [2M + Na]. HRMS (ESI):  $m/z$  calculated for C<sub>10</sub>H<sub>21</sub>NO<sub>3</sub>SSi 286.09091; found 286.08977 [M + Na]<sup>+</sup> (error -1.14 ppm).

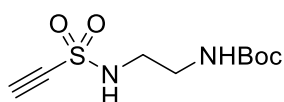

**tert-Butyl (2-(ethynylsulfonamido)ethyl)carbamate (2l):** Prepared as shown in general procedure 3A; yellow gam; eluent (Hexane:EtOAc = 1:1, v/v); yield, 72%. FT-IR (NaCl)  $\nu$  cm<sup>-1</sup>: 3410 (m), 3253 (br), 2980 (m) 2935 (m), 2255 (w), 1091 (s), 1691 (s), 1521 (s), 1454 (m), 1394 (w), 1367 (s), 1351 (s), 1169 (s), 1091 (m), 947 (w), 913 (w), 859 (w), 782 (w), 701 (s), 574 (m). <sup>1</sup>H-NMR (400 MHz, CDCl<sub>3</sub>)  $\delta$  5.97 (br, 1H), 4.94 (br, 1H), 3.38–3.31 (m, 4H), 3.27 (s, 1H), 1.45 (s, 9H). <sup>13</sup>C-NMR (101 MHz, CDCl<sub>3</sub>)  $\delta$  157.0, 80.4, 78.4, 76.6, 44.6, 39.9, 28.3. LRMS (ESI):  $m/z$  (%) 215 (base peak) [M + H<sub>2</sub>O - C<sub>4</sub>H<sub>10</sub>O + Na], 271 (19) [M + Na], 519 (12) [2M + Na]. HRMS (ESI):  $m/z$  calculated for C<sub>9</sub>H<sub>16</sub>N<sub>2</sub>O<sub>4</sub>NaS 271.07285; found 271.07281 [M + Na]<sup>+</sup> (error -0.13 ppm).

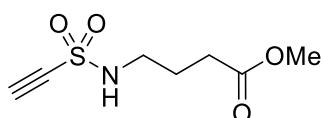

**Methyl 4-(ethynylsulfonamido)butanoate (2o):** Prepared as shown in general procedure 3C; colorless oil; eluent (Hexane:EtOAc = 2:1, v/v); yield, 20%. FT-IR (NaCl)  $\nu$  cm<sup>-1</sup>: 3255 (br), 2956 (w), 2069 (m), 1720 (m), 1439 (m), 1348 (s), 1261 (w), 1209 (w), 1164 (s), 1079 (m), 976 (w), 692 (s). <sup>1</sup>H-NMR (400 MHz, CDCl<sub>3</sub>)  $\delta$  5.26 (br, 1H), 3.70 (s, 3H), 3.29 (td,  $J$  = 6.7, 6.2 Hz, 2H), 3.28 (s, 1H), 2.47 (t,  $J$  = 6.9 Hz, 2H), 1.97 (quin,  $J$  = 6.8 Hz, 2H). <sup>13</sup>C-NMR (101 MHz, CDCl<sub>3</sub>)  $\delta$  173.7, 78.3, 76.8, 52.0, 43.1, 31.0, 24.2. LRMS (ESI):  $m/z$  (%) 228 (40) [M + Na]. HRMS (ESI):  $m/z$  calculated for C<sub>7</sub>H<sub>11</sub>NO<sub>4</sub>NaS 228.03065; found 228.03073 [M + Na]<sup>+</sup> (error +0.37 ppm).

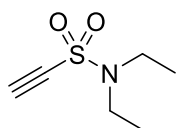

***N,N*-Diethylethynesulfonamide (2p):** Prepared as shown in general procedure 3B; pale yellow oil; eluent (Hexane:EtOAc = 4:1, v/v); yield, 91%. FT-IR (NaCl)  $\nu$  cm<sup>-1</sup>: 3251 (s), 2981 (s), 2941 (m), 2881 (m), 2066 (s), 1469 (m), 1363 (s), 1299 (m), 1205 (s), 1160 (s), 1098 (w), 1069 (w), 1019 (s), 945 (s), 787 (m), 727 (s), 659 (s), 529 (w). <sup>1</sup>H-NMR (400 MHz, CDCl<sub>3</sub>)  $\delta$  3.34 (q, *J* = 7.2 Hz, 4H), 3.21 (s, 1H), 1.27 (t, *J* = 7.2 Hz, 6H). <sup>13</sup>C-NMR (101 MHz, CDCl<sub>3</sub>)  $\delta$  78.7, 76.3, 42.9, 13.3. LRMS (EI): *m/z* (%) 89 (3) [M – C<sub>4</sub>H<sub>10</sub>N], 118 (48) [M – C<sub>2</sub>H<sub>5</sub> – CH<sub>3</sub> + H], 146 (base peak) [M – CH<sub>3</sub>], 161 (12) [M]. HRMS (EI): *m/z* calculated for C<sub>6</sub>H<sub>11</sub>NO<sub>2</sub>S 161.05105; found 161.0510 [M]<sup>+</sup> (error –0.3 ppm).

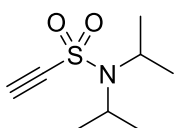

***N,N*-Diisopropylethynesulfonamide (2q):** Prepared as shown in general procedure 3B; colorless crystals; eluent (Hexane:EtOAc = 5:1, v/v); yield, 79%. UV (abs)  $\lambda_{\text{max}}$ : < 220 nm (5%v/v MeCN in Water). FT-IR (KBr)  $\nu$  cm<sup>-1</sup>: 3244 (s), 2981 (m), 2934 (w), 2880 (w), 2063 (s), 1469 (w), 1408 (m), 1373 (m), 1344 (s), 1203 (s), 1173 (s), 1139 (s), 1118 (s), 1018 (m), 989 (s), 887 (w), 714 (s), 641 (m), 565 (s), 535 (m), 480 (w), 455 (m). <sup>1</sup>H-NMR (400 MHz, CDCl<sub>3</sub>)  $\delta$  3.91 (sep, *J* = 6.8 Hz, 2H), 3.18 (s, 1H), 1.37 (d, *J* = 6.8 Hz, 12H). <sup>13</sup>C-NMR (101 MHz, CDCl<sub>3</sub>)  $\delta$  81.7, 74.9, 49.8, 21.3. LRMS (EI): *m/z* (%) 132 (base peak) [M – C<sub>3</sub>H<sub>7</sub> – CH<sub>3</sub>], 174 (31) [M – CH<sub>3</sub>], 189 (4) [M]. HRMS (EI): *m/z* calculated for C<sub>8</sub>H<sub>15</sub>NO<sub>2</sub>S 189.08235; found 189.0826 [M]<sup>+</sup> (error +1.5 ppm).

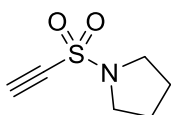

**1-(Ethynylsulfonyl)pyrrolidine (2r):** Prepared as shown in general procedure 3B; colorless oil; eluent (Hexane:EtOAc = 4:1, v/v); yield, 81%. UV (abs)  $\lambda_{\text{max}}$ : < 220 nm (5%v/v MeCN in Water). FT-IR (ATR)  $\nu$  cm<sup>-1</sup>: 3227 (br), 3107 (w), 3057 (w), 2978 (m), 2888 (m), 2063 (m), 1455 (w), 1337 (s), 1204 (m), 1150 (s), 1075 (s), 1010 (s), 735 (s), 668 (s). <sup>1</sup>H-NMR (400 MHz, CDCl<sub>3</sub>)  $\delta$  3.42–3.38 (m, 4H), 3.21 (s, 1H), 2.01–1.94 (m, 4H). <sup>13</sup>C-NMR (101 MHz, CDCl<sub>3</sub>)  $\delta$  76.9, 75.9, 48.7, 25.3. LRMS (EI): *m/z* (%) 42 (58) [M – C<sub>3</sub>H<sub>3</sub>NO<sub>2</sub>S], 89 (12) [M – C<sub>4</sub>H<sub>8</sub>N], 118 (4) [M – C<sub>3</sub>H<sub>6</sub> + H], 158 (base peak) [M – H], 159 (76) [M]. HRMS (EI): *m/z* calculated for C<sub>6</sub>H<sub>9</sub>NO<sub>2</sub>S 159.03540; found 159.0350 [M]<sup>+</sup> (error –2.7 ppm).

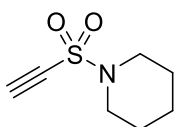

**1-(Ethynylsulfonyl)piperidine (2s):** Prepared as shown in general procedure 3B; colorless oil; eluent (Hexane:EtOAc = 4:1, v/v); yield, 89%. FT-IR (ATR)  $\nu$  cm<sup>-1</sup>: 3259 (br), 3065 (w), 2874 (w), 2069 (m), 1602 (m), 1425 (m), 1347 (s), 1164 (s), 1057 (m), 856 (w), 810 (m), 692 (s). <sup>1</sup>H-NMR (400 MHz, CDCl<sub>3</sub>)  $\delta$  3.27 (s, 1H), 3.18 (t,  $J$  = 5.6 Hz, 4H), 1.74 (quin,  $J$  = 5.6 Hz, 4H), 1.60–1.54 (m, 2H). <sup>13</sup>C-NMR (101 MHz, CDCl<sub>3</sub>)  $\delta$  78.1, 75.3, 47.1, 24.6, 23.3. LRMS (EI):  $m/z$  (%) 132 (40) [M – C<sub>3</sub>H<sub>6</sub> + H], 172 (base peak) [M – H], 173 (60) [M]. HRMS (EI):  $m/z$  calculated for C<sub>7</sub>H<sub>11</sub>NO<sub>2</sub>S 173.05105; found 173.0507 [M]<sup>+</sup> (error –1.8 ppm).

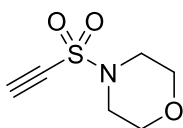

**4-(Ethynylsulfonyl)morpholine (2t):** Prepared as shown in general procedure 3B (The solvent used is Et<sub>2</sub>O instead of THF); off-white crystals; eluent (Hexane:EtOAc = 2:1, v/v); yield, 75%. UV (abs)  $\lambda_{\text{max}}$ : < 220 nm (5%v/v MeCN in Water). FT-IR (NaCl)  $\nu$  cm<sup>-1</sup>: 3249 (m), 2973 (w), 2923 (m), 2862 (m), 2064 (s), 1455 (m), 1368 (s), 1300 (m), 1263 (s), 1218 (w), 1175 (s), 1114 (s), 1076 (s), 1017 (w), 953 (s), 927 (w), 852 (w), 747 (s), 670 (m), 617 (m). <sup>1</sup>H-NMR (400 MHz, CDCl<sub>3</sub>)  $\delta$  3.85–3.82 (m, 4H), 3.35 (s, 1H), 3.21–3.19 (m, 4H). <sup>13</sup>C-NMR (101 MHz, CDCl<sub>3</sub>)  $\delta$  79.1, 74.4, 65.6, 46.1. LRMS (EI):  $m/z$  (%) 56 (91) [M – C<sub>2</sub>HO<sub>2</sub>S – CH<sub>2</sub>O], 86 (base peak) [M – C<sub>2</sub>HO<sub>2</sub>S], 89 (21) [M – C<sub>4</sub>H<sub>8</sub>NO], 175 (52) [M]. HRMS (EI):  $m/z$  calculated for C<sub>6</sub>H<sub>9</sub>NO<sub>3</sub>S 175.03031; found 175.0300 [M]<sup>+</sup> (error –1.9 ppm).

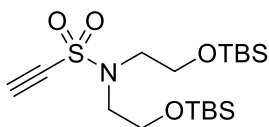

**N,N-Bis(2-((tert-butyldimethylsilyl)oxy)ethyl)ethynylsulfonamide (2u):** Prepared as shown in general procedure 3B (The solvent used is Et<sub>2</sub>O instead of THF, and saturated citric acid aqueous solution instead of 5 M HCl aqueous solution.); colorless oil; eluent (Hexane:EtOAc = 9:1, v/v); yield, 96%. FT-IR (ATR)  $\nu$  cm<sup>-1</sup>: 3252 (w), 2953 (m), 2930 (m), 2885 (m), 2858 (m), 2066 (m), 1472 (w), 1464 (w), 1364 (m), 1254 (m), 1169 (m), 1104 (s), 1003 (m), 936 (w), 916 (w), 835 (s), 775 (s), 723 (s). <sup>1</sup>H-NMR (400 MHz, CDCl<sub>3</sub>)  $\delta$  3.83 (t,  $J$  = 6.1 Hz, 4H), 3.46 (t,  $J$  = 6.0 Hz, 4H), 3.20 (s, 1H), 0.90 (s, 18H), 0.07 (s, 12H). <sup>13</sup>C-NMR (101 MHz, CDCl<sub>3</sub>)  $\delta$  78.5, 76.2, 61.7, 52.1, 25.8, 18.2, –5.4. LRMS (EI):  $m/z$  (%) 364 (base peak) [M – C<sub>4</sub>H<sub>9</sub>], 406 (5) [M – CH<sub>3</sub>]. HRMS (EI):  $m/z$  calculated for C<sub>14</sub>H<sub>30</sub>NO<sub>4</sub>Si<sub>2</sub>S 364.14341; found 364.1427 [M – C<sub>4</sub>H<sub>9</sub>]<sup>+</sup> (error –1.9 ppm).

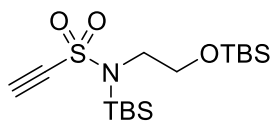

***N*-(*tert*-Butyldimethylsilyl)-*N*-(2-((*tert*-butyldimethylsilyl)oxy)ethyl)ethynesulfonamide (2v):**

Prepared as shown in general procedure 3B (The solvent used is Et<sub>2</sub>O instead of THF, and saturated citric acid aqueous solution instead of 5 M HCl aqueous solution.); colorless oil; eluent (Hexane:EtOAc = 19:1, v/v); yield, 53%. FT-IR (ATR)  $\nu$  cm<sup>-1</sup>: 3546 (br), 3261 (br), 2956 (s), 2933 (s), 2887 (m), 2860 (m), 2072 (m), 1472 (m), 1414 (m), 1360 (m), 1258 (m), 1175 (s), 1087 (m). <sup>1</sup>H-NMR (400 MHz, CDCl<sub>3</sub>)  $\delta$  3.83 (t, *J* = 7.2 Hz, 2H), 3.35 (t, *J* = 7.2 Hz, 2H), 3.19 (s, 1H), 0.99 (s, 9H), 0.90 (s, 9H), 0.39 (s, 6H), 0.07 (s, 6H). <sup>13</sup>C-NMR (101 MHz, CDCl<sub>3</sub>)  $\delta$  80.3, 75.3, 61.8, 49.1, 26.9, 25.9, 19.7, 18.3, -3.2, -5.3. LRMS (EI): *m/z* (%) 320 [M - C<sub>4</sub>H<sub>9</sub>] (base peak), 362 [M - CH<sub>3</sub>] (7). HRMS (EI): *m/z* calculated for C<sub>15</sub>H<sub>32</sub>NO<sub>3</sub>Si<sub>2</sub>S 3362.16414; found 362.1628 [M - CH<sub>3</sub>]<sup>+</sup> (error -3.9 ppm).

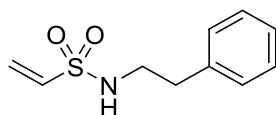

***N*-Phenethylvinylsulfonamide (3a):** Prepared as shown in general procedure 1C; pale yellow oil; eluent (Hexane:EtOAc = 2:1, v/v); yield, 91%. FT-IR (NaCl)  $\nu$  cm<sup>-1</sup>: 3290 (s), 3060 (m), 3028 (m), 2935 (m), 2871 (w), 1604 (w), 1496 (m), 1455 (m), 1327 (s), 1255 (w), 1149 (s), 1075 (m), 1030 (w), 970 (m), 901 (w), 818 (w), 751 (m), 701 (m), 660 (m), 546 (m). <sup>1</sup>H-NMR (400 MHz, CDCl<sub>3</sub>)  $\delta$  7.34–7.18 (m, 5H), 6.39 (dd, *J* = 16.6, 9.8 Hz, 1H), 6.21 (d, *J* = 16.6 Hz, 1H), 5.89 (d, *J* = 9.8 Hz, 1H), 4.35 (br, 1H), 3.29 (q, *J* = 6.8 Hz, 2H), 2.86 (t, *J* = 6.8 Hz, 2H). <sup>13</sup>C-NMR (101 MHz, CDCl<sub>3</sub>)  $\delta$  137.6, 135.7, 128.8, 126.9, 126.6, 44.1, 36.1. LRMS (EI): *m/z* (%) 91 (31) [M - C<sub>3</sub>H<sub>6</sub>NO<sub>2</sub>S], 120 (base peak) [M - C<sub>7</sub>H<sub>7</sub>], 211 (4) [M]. HRMS (EI): *m/z* calculated for C<sub>10</sub>H<sub>13</sub>NO<sub>2</sub>S 211.06670; found 211.0669 [M]<sup>+</sup> (error +1.1 ppm).

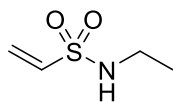

***N*-Ethylvinylsulfonamide (3b):** Prepared as shown in general procedure 1A; yellow oil; eluent (Hexane:EtOAc = 2:1, v/v); yield, 51%. FT-IR (NaCl)  $\nu$  cm<sup>-1</sup>: 3608 (w), 3266 (br), 3058 (w), 2982 (m), 2939 (w), 2880 (w), 1941 (w), 1426 (m), 1322 (s), 1151 (s), 1062 (m), 970 (s), 864 (w), 779 (m), 736 (m), 661 (w). <sup>1</sup>H-NMR (400 MHz, CDCl<sub>3</sub>)  $\delta$  6.52 (dd, *J* = 16.8, 10.0 Hz, 1H), 6.26 (d, *J* = 16.8 Hz, 1H), 5.95 (d, *J* = 10.0 Hz, 1H), 4.26 (br, 1H), 3.10 (qd, *J* = 7.2, 6.0 Hz, 2H), 1.21 (t, *J* = 7.2 Hz, 3H). <sup>13</sup>C-NMR (101 MHz, CDCl<sub>3</sub>)  $\delta$  135.9, 126.6, 38.0, 15.5. LRMS (EI): *m/z* (%) 27 (7) [M - C<sub>2</sub>H<sub>6</sub>NO<sub>2</sub>S], 44 (6) [M - C<sub>2</sub>H<sub>3</sub>O<sub>2</sub>S], 91 (32) [M - C<sub>2</sub>H<sub>6</sub>], 108 (1) [M - C<sub>2</sub>H<sub>3</sub>], 120 (base peak) [M -

CH<sub>3</sub>], 135 (5) [M]. HRMS (EI):  $m/z$  calculated for C<sub>4</sub>H<sub>9</sub>NO<sub>2</sub>S 135.03540; found 135.0352 [M]<sup>+</sup> (error -1.4 ppm).

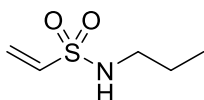

**N-Propylvinylsulfonamide (3c):** Prepared as shown in general procedure 1C; pale yellow oil; eluent (Hexane:EtOAc = 3:1, v/v); yield, 84%. FT-IR (NaCl)  $\nu$  cm<sup>-1</sup>: 3595 (br), 3292 (s), 3108 (w), 3059 (w), 2969 (s), 2938 (s), 2878 (m), 1458 (m), 1426 (s), 1387 (s), 1325 (vs), 1255 (m), 1152 (vs), 1076 (s), 1004 (m), 970 (s), 842 (m), 737 (s), 661 (m). <sup>1</sup>H-NMR (400 MHz, CDCl<sub>3</sub>)  $\delta$  6.52 (dd,  $J$  = 16.6, 10.0 Hz, 1H), 6.24 (d,  $J$  = 16.6 Hz, 1H), 5.94 (d,  $J$  = 10.0 Hz, 1H), 4.49 (br, 1H), 2.99 (q,  $J$  = 7.6 Hz, 2H), 1.58 (sext,  $J$  = 7.6 Hz, 2H), 0.95 (t,  $J$  = 7.6 Hz, 3H). <sup>13</sup>C-NMR (101 MHz, CDCl<sub>3</sub>)  $\delta$  135.9, 126.5, 44.7, 23.2, 11.1. LRMS (EI):  $m/z$  (%) 91 (23) [M - C<sub>3</sub>H<sub>8</sub>N], 120 (base peak) [M - C<sub>2</sub>H<sub>5</sub>], 149 (3) [M]. HRMS (EI):  $m/z$  calculated for C<sub>5</sub>H<sub>11</sub>NO<sub>2</sub>S 149.05105; found 149.0506 [M]<sup>+</sup> (error -3.3 ppm).

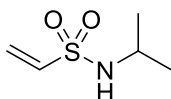

**N-Isopropylvinylsulfonamide (3d):** Prepared as shown in general procedure 1A; yellow oil; eluent (Hexane:EtOAc = 3:2, v/v); yield, 65%. FT-IR (NaCl)  $\nu$  cm<sup>-1</sup>: 3286 (vs), 3059 (w), 2976 (s), 2937 (m), 2878 (m), 1468 (m), 1427 (s), 1388 (m), 1329 (s), 1257 (m), 1136 (s), 1007 (s), 970 (s), 896 (s), 833 (w), 735 (s), 664 (s), 553 (m). <sup>1</sup>H-NMR (400 MHz, CDCl<sub>3</sub>)  $\delta$  6.54 (dd,  $J$  = 16.6, 9.9 Hz, 1H), 6.25 (d,  $J$  = 16.5 Hz, 1H), 5.91 (d,  $J$  = 9.9 Hz, 1H), 4.40 (d,  $J$  = 5.5 Hz, 1H), 3.52 (oct,  $J$  = 6.4 Hz, 1H), 1.22 (d,  $J$  = 6.6 Hz, 6H). <sup>13</sup>C-NMR (101 MHz, CDCl<sub>3</sub>)  $\delta$  137.0, 125.8, 46.1, 24.0. LRMS (EI):  $m/z$  (%) 90 (14) [M - C<sub>3</sub>H<sub>8</sub>N], 134 (base peak) [M - CH<sub>3</sub>]. HRMS (EI):  $m/z$  calculated for C<sub>4</sub>H<sub>8</sub>NO<sub>2</sub>S 134.02757; found 134.0276 [M - CH<sub>3</sub>]<sup>+</sup> (error -0.1 ppm).

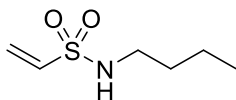

**N-Butylvinylsulfonamide (3e):** Prepared as shown in general procedure 1A; pale yellow oil; eluent (Hexane:EtOAc = 3:1, v/v); yield, 79%. FT-IR (NaCl)  $\nu$  cm<sup>-1</sup>: 3291 (s), 3107 (m), 3059 (w), 2961 (s), 2935 (s), 2874 (s), 1465 (m), 1426 (s), 1386 (s), 1327 (vs), 1256 (m), 1152 (vs), 1082 (s), 971 (s), 906 (m), 865 (m), 800 (m), 740 (s), 660 (s). <sup>1</sup>H-NMR (400 MHz, CDCl<sub>3</sub>)  $\delta$  6.51 (dd,  $J$  = 16.6, 9.9 Hz, 1H), 6.23 (d,  $J$  = 16.6 Hz, 1H), 5.93 (d,  $J$  = 9.9 Hz, 1H), 4.51 (br, 1H), 2.99 (td,  $J$  = 7.2, 6.0 Hz, 2H), 1.54 (quin,  $J$  = 7.2 Hz, 2H), 1.37 (sext,  $J$  = 7.2 Hz, 2H), 0.91 (t,  $J$  = 7.2 Hz, 3H). <sup>13</sup>C-NMR (101 MHz,

CDCl<sub>3</sub>)  $\delta$  135.8, 126.5, 42.7, 31.8, 19.7, 13.5. LRMS (FAB):  $m/z$  (%) 135 (10) [M + H – C<sub>2</sub>H<sub>5</sub>], 164 (base peak) [M + H], 327 (27) [2M + H]. HRMS (FAB):  $m/z$  calculated for C<sub>6</sub>H<sub>14</sub>NO<sub>2</sub>S 164.07398; found 164.0742 [M + H]<sup>+</sup> (error –2.1 ppm).

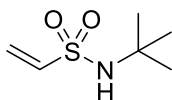

**N-(tert-Butyl)vinylsulfonamide (3f):** Prepared as shown in general procedure 1C; off-white crystals; eluent (Hexane:EtOAc = 3:1, v/v); yield, 79%. FT-IR (NaCl)  $\nu$  cm<sup>-1</sup>: 3297 (s), 3101 (m), 3054 (m), 2986 (s), 2938 (m), 2878 (m), 1965 (w), 1469 (m), 1423 (m), 1372 (s), 1310 (s), 1259 (s), 1231 (s), 1204 (m), 1127 (s), 1047 (m), 1007 (s), 985 (s), 873 (s), 762 (s), 732 (s), 676 (s). <sup>1</sup>H-NMR (400 MHz, CDCl<sub>3</sub>)  $\delta$  6.61 (dd,  $J$  = 16.5, 9.9 Hz, 1H), 6.23 (d,  $J$  = 16.5 Hz, 1H), 5.84 (d,  $J$  = 9.9 Hz, 1H), 4.47 (br, 1H), 1.35 (s, 9H). <sup>13</sup>C-NMR (101 MHz, CDCl<sub>3</sub>)  $\delta$  139.5, 129.0, 128.2, 124.5, 54.6, 30.3. LRMS (EI):  $m/z$  (%) 91 (6) [M – C<sub>4</sub>H<sub>10</sub>N], 148 (base peak) [M – CH<sub>3</sub>]. HRMS (EI):  $m/z$  calculated for C<sub>5</sub>H<sub>10</sub>NO<sub>2</sub>S 148.04322; found 148.0433 [M – CH<sub>3</sub>]<sup>+</sup> (error +0.4 ppm).

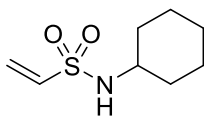

**N-Cyclohexylvinylsulfonamide (3g):** Prepared as shown in general procedure 1A; off-white crystals; eluent (Hexane:EtOAc = 3:1, v/v); yield, 84%. FT-IR (KBr)  $\nu$  cm<sup>-1</sup>: 3269 (s), 3099 (w), 3049 (w), 2940 (s), 2857 (s), 2670 (w), 1610 (w), 1449 (s), 1391 (s), 1317 (s), 1256 (s), 1132 (m), 1085 (s), 986 (s), 927 (m), 890 (s), 842 (w), 733 (s), 673 (s), 588 (m). <sup>1</sup>H-NMR (400 MHz, CDCl<sub>3</sub>)  $\delta$  6.54 (dd,  $J$  = 16.5, 9.9 Hz, 1H), 6.25 (d,  $J$  = 16.5 Hz, 1H), 5.89 (d,  $J$  = 9.9 Hz, 1H), 4.44 (d,  $J$  = 7.1 Hz, 1H), 3.22–3.13 (m, 1H), 1.96–1.93 (m, 2H), 1.75–1.67 (m, 2H), 1.60–1.54 (m, 1H), 1.37–1.11 (m, 5H). <sup>13</sup>C-NMR (101 MHz, CDCl<sub>3</sub>)  $\delta$  137.2, 125.6, 52.6, 34.3, 25.1, 24.7. LRMS (EI):  $m/z$  (%) 91 (8) [M – C<sub>6</sub>H<sub>12</sub>N], 98 (13) [M – C<sub>2</sub>H<sub>3</sub>O<sub>2</sub>S], 146 (base peak) [M – C<sub>3</sub>H<sub>7</sub>], 160 (4) [M – C<sub>2</sub>H<sub>5</sub>], 189 (14) [M]. HRMS (EI):  $m/z$  calculated for C<sub>8</sub>H<sub>15</sub>NO<sub>2</sub>S 189.08235; found 189.0822 [M]<sup>+</sup> (error –1.0 ppm).

Note: McLafferty rearrangement.

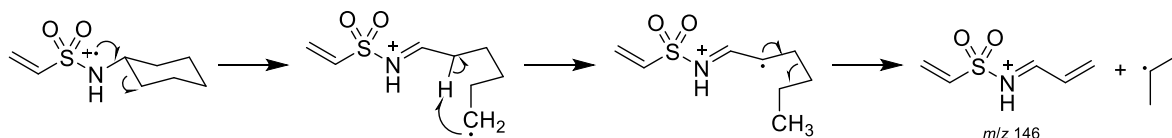

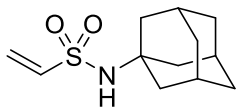

***N*-((3s,5s,7s)-Adamantan-1-yl)ethenesulfonamide (3h):** Prepared as shown in general procedure 1C; off-white crystals; eluent (Hexane:EtOAc = 3:1, v/v); yield, 81%. FT-IR (KBr)  $\nu$  cm<sup>-1</sup>: 3280 (s), 3099 (w), 3056 (w), 3982 (w), 3914 (s), 2869 (m), 2851 (m), 1455 (m), 1435 (s), 1387 (w), 1360 (m), 1344 (m), 1323 (s), 1288 (m), 1258 (m), 1152 (s), 1117 (m), 1088 (s), 993 (m), 976 (m), 964 (m), 872 (m), 815 (w), 776 (w), 740 (m), , 721 (w), 660 (m), 641 (w), 556 (m). <sup>1</sup>H-NMR (400 MHz, CDCl<sub>3</sub>)  $\delta$  6.62 (dd,  $J$  = 16.5, 9.9 Hz, 1H), 6.23 (d,  $J$  = 16.5 Hz, 1H), 5.82 (d,  $J$  = 9.8 Hz, 1H), 4.25 (br, 1H), 2.09 (br, 3H), 1.92 (d,  $J$  = 2.9 Hz, 6H), 1.68–1.60 (m, 6H). <sup>13</sup>C-NMR (101 MHz, CDCl<sub>3</sub>)  $\delta$  140.0, 124.3, 77.3, 77.0, 76.7, 55.1, 43.3, 35.9, 29.6. LRMS (ESI):  $m/z$  (%) 106 (base peak) [M – C<sub>10</sub>H<sub>15</sub>], 136 (53) [M – C<sub>2</sub>H<sub>4</sub>NO<sub>2</sub>S + H], 264 (50) [M + Na]. HRMS (ESI):  $m/z$  calculated for C<sub>12</sub>H<sub>23</sub>NO<sub>2</sub>NaS 264.10342; found 264.10442 [M + Na]<sup>+</sup> (error +3.79 ppm).

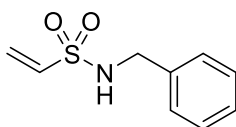

***N*-Benzylvinylsulfonamide (3i):** Prepared as shown in general procedure 1A; yellow crystals; eluent (Hexane:EtOAc = 2:1, v/v); yield, 70%. FT-IR (KBr)  $\nu$  cm<sup>-1</sup>: 3315 (br), 3101 (w), 3059 (w), 3033 (w), 1067 (w), 1497 (w), 1456 (m), 1426 (m), 1386 (m), 1323 (s), 1253 (w), 1147 (s), 1055 (m), 979 (m), 879 (w), 743 (m), 698 (m), 662 (m), 553 (m). <sup>1</sup>H-NMR (400 MHz, CDCl<sub>3</sub>)  $\delta$  7.37–7.27 (m, 5H), 6.47 (dd,  $J$  = 16.6, 9.9 Hz, 1H), 6.24 (d,  $J$  = 16.5 Hz, 1H), 5.91 (d,  $J$  = 9.9 Hz, 1H), 4.76 (br, 1H), 4.20 (d,  $J$  = 6.2 Hz, 2H). <sup>13</sup>C-NMR (101 MHz, CDCl<sub>3</sub>)  $\delta$  136.5, 136.0, 128.8, 128.1, 127.9, 126.8, 47.0. LRMS (EI):  $m/z$  (%) 77 (10) [M – C<sub>3</sub>H<sub>6</sub>NO<sub>2</sub>S], 91 (19) [M – C<sub>2</sub>H<sub>4</sub>NO<sub>2</sub>S], 106 (base peak) [M – C<sub>7</sub>H<sub>7</sub>], 197 (1) [M]. HRMS (EI):  $m/z$  calculated for C<sub>9</sub>H<sub>11</sub>NO<sub>2</sub>S 197.05105; found 197.0509 [M]<sup>+</sup> (error –0.7 ppm).

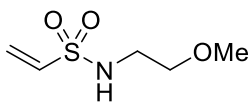

***N*-(2-Methoxyethyl)ethenesulfonamide (3j):** Prepared as shown in general procedure 1A; colorless oil; eluent (Hexane:EtOAc = 1:1, v/v); yield, 51%. FT-IR (NaCl)  $\nu$  cm<sup>-1</sup>: 3587 (br), 3284 (br), 3059 (w), 2934 (m), 2895 (m), 2934 (w), 1635 (w), 1426 (m), 1388 (m), 1327 (s), 1257 (w), 1197 (w), 1149 (s), 1126 (s), 1084 (s), 1027 (w), 967 (m), 869 (w), 797 (w), 735 (w), 660 (w). <sup>1</sup>H-NMR (400 MHz, CDCl<sub>3</sub>)  $\delta$  6.54 (dd,  $J$  = 16.6, 9.9 Hz, 1H), 6.26 (d,  $J$  = 16.6 Hz, 1H), 5.96 (d,  $J$  = 9.9 Hz, 1H), 4.78 (br, 1H), 3.51 (t,  $J$  = 5.2 Hz, 2H), 3.36 (s, 3H), 3.20 (ddd, 2H). <sup>13</sup>C-NMR (101 MHz, CDCl<sub>3</sub>)  $\delta$  135.9, 126.7, 70.8, 58.9, 42.7. LRMS (EI):  $m/z$  (%) 45 (base peak) [M – C<sub>3</sub>H<sub>6</sub>NO<sub>2</sub>S], 74 (18) [M – C<sub>2</sub>H<sub>3</sub>O<sub>2</sub>S],

91 (45) [M – C<sub>3</sub>H<sub>8</sub>N], 120 (17) [M – C<sub>2</sub>H<sub>5</sub>O], 134 (45) [M – CH<sub>3</sub>O]. HRMS (EI): *m/z* calculated for C<sub>3</sub>H<sub>5</sub>NO<sub>2</sub>S 120.01192; found 120.0117 [M – C<sub>2</sub>H<sub>5</sub>O]<sup>+</sup> (error –1.5 ppm).

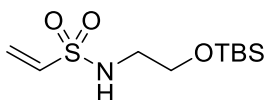

**N-(2-((*tert*-Butyldimethylsilyl)oxy)ethyl)ethenesulfonamide (3k):** 2-Aminoethanol (1.66 mL, 1.1 equiv.), DMAP (28 mg, 1.0 mol%), Et<sub>3</sub>N (18.8 mL, 5.0 equiv.), and *t*-butyldimethylsilyl (TBS) chloride (4.52 g, 1.2 equiv.) were added to DCM (100 mL) at 0 °C under N<sub>2</sub> and stirred for 1 hour. After **4** (2.62 mL, 1.0 equiv.) was added at 0 °C, and the reaction was stirred at 0 °C for 24 hours. After added PBS (100 mL, 1 M solution, pH 7.4), the reaction mixture was washed three times with distilled water, once with brine, and the organic layer was dried over Na<sub>2</sub>SO<sub>4</sub>. After concentration, chromatography was performed on the residue on a silica gel column (Hexane:EtOAc = 3:1, v/v) to give colorless oil **3k** (3.84g, 58%). FT-IR (NaCl)  $\nu$  cm<sup>-1</sup>: 3295 (br), 2954 (s), 2930 (s), 2884 (m), 2858 (s), 1472 (m), 1387 (m), 1331 (s), 1256 (s), 1155 (s), 1088 (s), 1006 (w), 970 (s), 837 (s), 779 (s), 734 (m), 662 (m). <sup>1</sup>H-NMR (400 MHz, CDCl<sub>3</sub>)  $\delta$  6.54 (dd, *J* = 16.5, 9.9 Hz, 1H), 6.26 (d, *J* = 16.6 Hz, 1H), 5.95 (d, *J* = 9.9 Hz, 1H), 4.63 (s, 1H), 3.74–3.72 (m, 2H), 3.15–3.11 (m, 2H), 0.89 (s, 9H), 0.07 (s, 6H). <sup>13</sup>C-NMR (101 MHz, CDCl<sub>3</sub>)  $\delta$  135.9, 126.6, 61.7, 45.1, 25.9, 18.3, –5.4. LRMS (EI): *m/z* (%) 208 (base peak) [M – C<sub>4</sub>H<sub>9</sub>], 250 (12) [M – CH<sub>3</sub>]. HRMS (EI): *m/z* calculated for C<sub>9</sub>H<sub>20</sub>NO<sub>3</sub>SiS 250.09332; found 250.0932 [M – CH<sub>3</sub>]<sup>+</sup> (error –0.6 ppm).

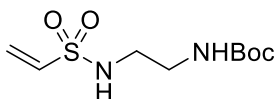

***tert*-Butyl (2-(vinylsulfonamido)ethyl)carbamate (3l):** Prepared as shown in general procedure 1A; colorless oil; eluent (Hexane:EtOAc = 1:1, v/v); yield, 61%. FT-IR (NaCl)  $\nu$  cm<sup>-1</sup>: 3384 (br), 3298 (br), 3059 (w), 2979 (m), 2934 (w), 1693 (s), 1521 (s), 1455 (m), 1392 (m), 1367 (m), 1329 (s), 1275 (s), 1254 (s), 1151 (s), 1090 (m), 970 (m), 916 (m), 861 (w), 734 (s), 660 (m). <sup>1</sup>H-NMR (400 MHz, CDCl<sub>3</sub>)  $\delta$  6.53 (dd, *J* = 16.5, 9.9 Hz, 1H), 6.25 (d, *J* = 16.5 Hz, 1H), 5.95 (d, *J* = 9.9 Hz, 1H), 5.09 (br, 1H), 4.94 (br, 1H), 3.29 (q, *J* = 5.8 Hz, 2H), 3.15 (q, *J* = 5.8 Hz, 2H), 1.45 (s, 9H). <sup>13</sup>C-NMR (101 MHz, CDCl<sub>3</sub>)  $\delta$  156.6, 135.7, 126.7, 80.0, 43.5, 40.5, 28.3. LRMS (EI): *m/z* (%) 172 (15) [M + Na – C<sub>5</sub>H<sub>10</sub>O<sub>2</sub>], 216 (base peak) [M + H – C<sub>4</sub>H<sub>9</sub>], 273 (47) [M + Na]. HRMS (ESI): *m/z* calculated for C<sub>9</sub>H<sub>18</sub>N<sub>2</sub>O<sub>4</sub>NaS 273.08850; found 273.08960 [M + Na]<sup>+</sup> (error +4.05 ppm).

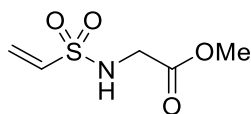

**Methyl (vinylsulfonyl)glycinate (3m):** Prepared as shown in general procedure 1C (Et<sub>3</sub>N (4.0 equiv.)); colorless oil; eluent (Hexane:EtOAc = 1:1, v/v); yield, 71%. FT-IR (NaCl)  $\nu$  cm<sup>-1</sup>: 3617 (br), 3294 (br), 3062 (w), 2958 (w), 1748 (s), 1438 (m), 1388 (w), 1331 (s), 1220 (m), 1149 (s), 1063 (w), 976 (m), 855 (m), 740 (m), 652 (w). <sup>1</sup>H-NMR (400 MHz, CDCl<sub>3</sub>)  $\delta$  6.56 (dd,  $J$  = 16.5, 9.9 Hz, 1H), 6.27 (d,  $J$  = 16.5 Hz, 1H), 5.96 (d,  $J$  = 9.9 Hz, 1H), 5.05 (br, 1H), 3.86 (d,  $J$  = 5.7 Hz, 2H), 3.78 (s, 3H). <sup>13</sup>C-NMR (101 MHz, CDCl<sub>3</sub>)  $\delta$  169.9, 135.6, 127.2, 52.7, 43.9. LRMS (EI):  $m/z$  (%) 91 (22) [M - C<sub>3</sub>H<sub>6</sub>NO<sub>2</sub>], 120 (base peak) [M - C<sub>2</sub>H<sub>3</sub>O<sub>2</sub>], 179 (2) [M]. HRMS (EI):  $m/z$  calculated for C<sub>5</sub>H<sub>9</sub>NO<sub>4</sub>S 179.02523; found 179.0249 [M]<sup>+</sup> (error -1.8 ppm).

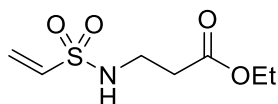

**Ethyl 3-(vinylsulfonamido)propanoate (3n):** Prepared as shown in general procedure 1C (Et<sub>3</sub>N (4.0 equiv.)); colorless oil; eluent (Hexane:EtOAc = 1:1, v/v); yield, 99%. FT-IR (NaCl)  $\nu$  cm<sup>-1</sup>: 3603 (br), 3292 (br), 3059 (w), 1728 (s), 1422 (m), 1381 (m), 1329 (s), 1259 (m), 1191 (m), 1150 (s), 1092 (m), 1052 (m), 971 (m), 817 (w), 734 (m), 661 (w). <sup>1</sup>H-NMR (400 MHz, CDCl<sub>3</sub>)  $\delta$  6.54 (dd,  $J$  = 16.6, 9.9 Hz, 1H), 6.27 (d,  $J$  = 16.6 Hz, 1H), 5.96 (d,  $J$  = 9.9 Hz, 1H), 5.01 (br, 1H), 4.17 (q,  $J$  = 7.1 Hz, 2H), 3.28 (q,  $J$  = 6.1 Hz, 2H), 2.62 (t,  $J$  = 5.9 Hz, 2H), 1.28 (t,  $J$  = 7.1 Hz, 3H). <sup>13</sup>C-NMR (101 MHz, CDCl<sub>3</sub>)  $\delta$  172.1, 136.0, 126.8, 61.1, 38.6, 34.4, 14.2. LRMS (FAB):  $m/z$  (%) 91 (9) [M - C<sub>5</sub>H<sub>10</sub>NO<sub>2</sub>], 120 (38) [M - C<sub>4</sub>H<sub>8</sub>O<sub>2</sub>], 162 (45) [M - C<sub>2</sub>H<sub>5</sub>O], 208 (base peak) [M + H]. HRMS (FAB):  $m/z$  calculated for C<sub>7</sub>H<sub>13</sub>NO<sub>4</sub>S 208.06381; found 208.0644 [M + H]<sup>+</sup> (error +2.8 ppm).

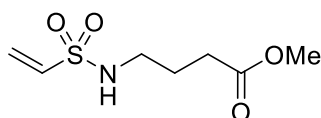

**Methyl 4-(vinylsulfonamido)butanoate (3o):** Prepared as shown in general procedure 1C (Et<sub>3</sub>N (4.0 equiv.)); colorless oil; eluent (Hexane:EtOAc = 1:1, v/v); yield, 90%. FT-IR (NaCl)  $\nu$  cm<sup>-1</sup>: 3291 (br), 2953 (w), 1731 (s), 1437 (m), 1386 (m), 1324 (s), 1257 (m), 1203 (m), 1145 (s), 1079 (m), 968 (m), 896 (w), 836 (w), 734 (m), 659 (m). <sup>1</sup>H-NMR (400 MHz, CDCl<sub>3</sub>)  $\delta$  6.52 (dd,  $J$  = 16.5, 9.9 Hz, 1H), 6.25 (d,  $J$  = 16.6 Hz, 1H), 5.96 (d,  $J$  = 9.9 Hz, 1H), 4.67 (br, 1H), 3.69 (s, 3H), 3.09 (q,  $J$  = 6.6 Hz, 2H), 2.43 (t,  $J$  = 7.1 Hz, 2H), 1.89 (quin,  $J$  = 6.9 Hz, 2H). <sup>13</sup>C-NMR (101 MHz, CDCl<sub>3</sub>)  $\delta$  173.6, 135.8, 126.8, 51.8, 42.3, 30.9, 25.0. LRMS (ESI):  $m/z$  (%) 230 (41) [M + Na]. HRMS (ESI):  $m/z$  calculated for C<sub>7</sub>H<sub>13</sub>NO<sub>4</sub>NaS 230.04630; found 230.04676 [M + Na]<sup>+</sup> (error +2.0 ppm).

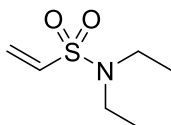

***N,N*-Diethylvinylsulfonamide (3p)**: Prepared as shown in general procedure 1A; yellow oil; eluent (Hexane:EtOAc = 2:1, v/v); yield, 82%. FT-IR (NaCl)  $\nu$  cm<sup>-1</sup>: 3057 (br), 2978 (s), 2939 (s), 2879 (m), 1468 (m), 1385 (s), 1334 (vs), 1201 (vs), 1145 (vs), 1093 (w), 1018 (s), 970 (m), 935 (s), 786 (s), 750 (vs), 689 (s), 632 (w). <sup>1</sup>H-NMR (400 MHz, CDCl<sub>3</sub>)  $\delta$  6.42 (dd,  $J$  = 16.5, 9.9 Hz, 1H), 6.20 (d,  $J$  = 16.5 Hz, 1H), 5.89 (d,  $J$  = 9.9 Hz, 1H), 3.23 (q,  $J$  = 7.1 Hz, 4H), 1.20 (t,  $J$  = 7.1 Hz, 6H). <sup>13</sup>C-NMR (101 MHz, CDCl<sub>3</sub>)  $\delta$  135.5, 125.8, 41.7, 14.3. LRMS (EI):  $m/z$  (%) 91 [M – C<sub>4</sub>H<sub>10</sub>N] (13), 120 [M – C<sub>2</sub>H<sub>4</sub> – CH<sub>3</sub>] (6), 148 [M – CH<sub>3</sub>] (base peak), 163 [M] (14). HRMS (EI):  $m/z$  calculated for C<sub>6</sub>H<sub>13</sub>NO<sub>2</sub>S 163.06670; found 163.0667 [M]<sup>+</sup> (error –0.1 ppm).

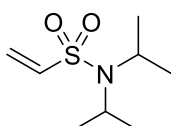

***N,N*-Diisopropylvinylsulfonamide (3q)**: Prepared as shown in general procedure 1A; yellow oil; eluent (Hexane:EtOAc = 5:1, v/v); yield, 70%. FT-IR (KBr)  $\nu$  cm<sup>-1</sup>: 3099 (w), 3060 (w), 3005 (w), 2949 (s), 2934 (m), 2878 (w), 1931 (w), 1462 (m), 1409 (m), 1384 (m), 1369 (m), 1323 (s), 1263 (w), 1202 (s), 1185 (s), 1165 (s), 1128 (s), 1027 (m), 1185 (m), 980 (s), 885 (m), 862 (w), 740 (s), 683 (s), 620 (w), 570 (s), 530 (s). <sup>1</sup>H-NMR (400 MHz, CDCl<sub>3</sub>)  $\delta$  6.45 (dd,  $J$  = 16.5, 9.8 Hz, 1H), 6.18 (d,  $J$  = 16.5 Hz, 1H), 5.79 (d,  $J$  = 9.8 Hz, 1H), 3.71 (sept,  $J$  = 6.8 Hz, 2H), 1.30 (d,  $J$  = 6.8 Hz, 12H). <sup>13</sup>C-NMR (101 MHz, CDCl<sub>3</sub>)  $\delta$  138.4, 124.1, 48.4, 22.1. LRMS (EI):  $m/z$  (%) 134 (base peak) [M – C<sub>3</sub>H<sub>6</sub> – CH<sub>3</sub>], 176 (45) [M – CH<sub>3</sub>], 191 (6) [M]. HRMS (EI):  $m/z$  calculated for C<sub>8</sub>H<sub>17</sub>NO<sub>2</sub>S 191.09800; found 191.0981 [M]<sup>+</sup> (error +0.8 ppm).

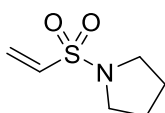

**1-(Vinylsulfonyl)pyrrolidine (3r)**: Prepared as shown in general procedure 1A; yellow oil; eluent (Hexane:EtOAc = 2:1, v/v); yield, 70%. FT-IR (NaCl)  $\nu$  cm<sup>-1</sup>: 3056 (w), 2978 (m), 2882 (m), 1461 (w), 1386 (m), 1341 (s), 1256 (m), 1200 (m), 1150 (s), 1065 (m), 1008 (m), 973 (m), 769 (s), 718 (m), 661 (s). <sup>1</sup>H-NMR (400 MHz, CDCl<sub>3</sub>)  $\delta$  6.48 (dd,  $J$  = 16.6, 9.9 Hz, 1H), 6.26 (d,  $J$  = 16.6 Hz, 1H), 6.01 (d,  $J$  = 9.9 Hz, 1H), 3.30–3.27 (m, 4H), 1.94–1.87 (m, 4H). <sup>13</sup>C-NMR (101 MHz, CDCl<sub>3</sub>)  $\delta$  132.7, 128.0, 46.5, 25.3, 23.6. LRMS (EI):  $m/z$  (%) 42 (40) [M – C<sub>3</sub>H<sub>5</sub>NO<sub>2</sub>S], 70 (base peak) [M – C<sub>2</sub>H<sub>3</sub>O<sub>2</sub>S],

90 (8) [M – C<sub>4</sub>H<sub>8</sub>N], 160 (87) [M – H], 161 (70) [M]. HRMS (EI): *m/z* calculated for C<sub>6</sub>H<sub>11</sub>NO<sub>2</sub>S 161.05105; found 161.0516 [M]<sup>+</sup> (error +3.3 ppm).

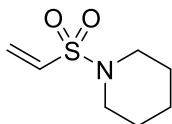

**1-(Vinylsulfonyl)piperidine (3s):** Prepared as shown in general procedure 1A; off-white crystals; eluent (Hexane:EtOAc = 4:1, v/v); yield, 63%. FT-IR (KBr)  $\nu$  cm<sup>-1</sup>: 2985 (w), 2942 (m), 2856 (m), 1469 (w), 1454 (w), 1385 (w), 1360 (m), 1339 (s), 1279 (w), 1261 (w), 1216 (w), 1163 (s), 1144 (m), 1106 (w), 1054 (m), 1028 (w), 971 (w), 931 (m), 859 (w), 839 (w), 757 (s), 693 (w), 657 (w). <sup>1</sup>H-NMR (400 MHz, CDCl<sub>3</sub>)  $\delta$  6.42 (dd, *J* = 16.6, 9.9 Hz, 1H), 6.21 (d, *J* = 16.6 Hz, 1H), 6.01 (d, *J* = 9.9 Hz, 1H), 3.13 (t, *J* = 5.5 Hz, 4H), 1.66 (quin, *J* = 5.6 Hz, 4H), 1.57–1.51 (m, 2H). <sup>13</sup>C-NMR (101 MHz, CDCl<sub>3</sub>)  $\delta$  131.7, 127.8, 47.8, 25.6. LRMS (EI): *m/z* (%) 83 (61) [M – C<sub>2</sub>H<sub>3</sub>O<sub>2</sub>S – H], 84 (32) [M – C<sub>2</sub>H<sub>3</sub>O<sub>2</sub>S], 91 (12) [M – C<sub>5</sub>H<sub>10</sub>N], 134 (19) [M – C<sub>3</sub>H<sub>6</sub> + H], 174 (base peak) [M – H], 175 (71) [M]. HRMS (EI): *m/z* calculated for C<sub>7</sub>H<sub>13</sub>NO<sub>2</sub>S 175.06670; found 175.0669 [M]<sup>+</sup> (error +1.1 ppm).

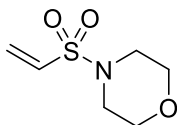

**4-(Vinylsulfonyl)morpholine (3t):** Prepared as shown in general procedure 1A; off-white crystals; eluent (Hexane:EtOAc = 1:1, v/v); yield, 58%. FT-IR (NaCl)  $\nu$  cm<sup>-1</sup>: 3103 (w), 3060 (w), 2977 (w), 2923 (w), 2909 (w), 2871 (m), 1455 (m), 1394 (m), 1344 (s), 1330 (s), 1297 (w), 1259 (s), 1216 (w), 1152 (s), 1112 (s), 1072 (s), 1029 (w), 896 (s), 939 (s), 851 (w), 768 (s), 700 (w), 666 (s), 573 (w), 549 (m), 487 (m), 472 (w). <sup>1</sup>H-NMR (400 MHz, CDCl<sub>3</sub>)  $\delta$  6.44 (dd, *J* = 16.6, 9.9 Hz, 1H), 6.27 (d, *J* = 16.6 Hz, 1H), 6.11 (d, *J* = 9.9 Hz, 1H), 3.78–3.76 (m, 4H), 3.16–3.13 (m, 4H). <sup>13</sup>C-NMR (101 MHz, CDCl<sub>3</sub>)  $\delta$  131.7, 129.6, 66.2, 45.6. LRMS (EI): *m/z* (%) 56 (74) [M – C<sub>2</sub>H<sub>3</sub>O<sub>2</sub>S – CH<sub>2</sub>O], 86 (base peak) [M – C<sub>2</sub>H<sub>3</sub>O<sub>2</sub>S], 91 (33) [M – C<sub>4</sub>H<sub>8</sub>NO], 120 (15) [M – C<sub>3</sub>H<sub>5</sub>O], 134 (35) [M – C<sub>2</sub>H<sub>3</sub>O], 177 (57) [M]. HRMS (EI): *m/z* calculated for C<sub>6</sub>H<sub>11</sub>NO<sub>3</sub>S 177.04596; found 177.0456 [M]<sup>+</sup> (error –2.2 ppm).

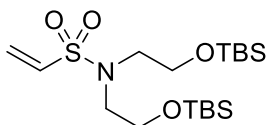

***N,N*-Bis(2-((*tert*-butyldimethylsilyl)oxy)ethyl)ethenesulfonamide (3u):** Prepared as shown in general procedure 1C (amine is **S2**); colorless oil; eluent (Hexane:EtOAc = 1:1, v/v); yield, 73%. FT-IR (NaCl)  $\nu$  cm<sup>-1</sup>: 2954 (m), 2929 (m), 2884 (m), 2858 (m), 1472 (w), 1464 (w), 1387 (w), 1343 (m),

1254 (m), 1149 (m), 1100 (s), 1101 (m), 964 (m), 936 (m), 915 (m), 835 (s), 810 (m), 774 (s), 747(m). <sup>1</sup>H-NMR (400 MHz, CDCl<sub>3</sub>)  $\delta$  6.53 (dd,  $J$  = 16.6, 9.9 Hz, 1H), 6.19 (d,  $J$  = 16.6 Hz, 1H), 5.86 (d,  $J$  = 9.9 Hz, 1H), 3.76 (t,  $J$  = 5.9 Hz, 4H), 3.35 (t,  $J$  = 5.9 Hz, 4H), 0.89 (s, 18H), 0.07 (s, 12H). <sup>13</sup>C-NMR (101 MHz, CDCl<sub>3</sub>)  $\delta$  135.5, 125.5, 62.1, 50.6, 25.9, 18.2, -5.4. LRMS (EI):  $m/z$  (%) 366 (base peak) [M – C<sub>4</sub>H<sub>9</sub>], 408 (8) [M – CH<sub>3</sub>]. HRMS (EI):  $m/z$  calculated for C<sub>17</sub>H<sub>38</sub>NO<sub>4</sub>Si<sub>2</sub>S 408.20601; found 408.2075 [M – CH<sub>3</sub>]<sup>+</sup> (error +3.5 ppm).

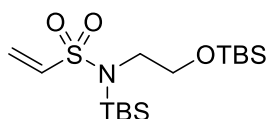

***N*-(*tert*-Butyldimethylsilyl)-*N*-(2-((*tert*-butyldimethylsilyl)oxy)ethyl)ethanesulfonamide (3v):** 2-Aminoethanol (1.66 mL, 1.1 equiv.), DMAP (28 mg, 1.0 mol%), Et<sub>3</sub>N (18.8 mL, 5.0 equiv.), and *t*-butyldimethylsilyl (TBS) chloride (7.91 g, 2.1 equiv.) were added to DCM (100 mL) at 0 °C under N<sub>2</sub> and stirred for 1 hour. After **4** (2.62 mL, 1.0 equiv.) was added at 0 °C, and the reaction was stirred at 0 °C for 24 hours. After added PBS (100 mL, 1 M solution, pH 7.4), the reaction mixture was washed three times with distilled water, once with brine, and the organic layer was dried over Na<sub>2</sub>SO<sub>4</sub>. After concentration, chromatography was performed on the residue on a silica gel column (Hexane:EtOAc = 19:1, v/v) to give colorless oil **3v** (4.73 g, 52%). FT-IR (NaCl)  $\nu$  cm<sup>-1</sup>: 2955 (s), 2930 (s), 2886 (m), 2858 (s), 1472 (m), 1386 (w), 1362 (w), 1336 (s), 1257 (s), 1149 (s), 1085 (s), 1040 (w), 1006 (w), 965 (m), 903 (s), 840 (s), 825 (s), 813 (m), 778 (m), 741 (m), 666 (m). <sup>1</sup>H-NMR (400 MHz, CDCl<sub>3</sub>)  $\delta$  6.49 (dd,  $J$  = 16.5, 9.9 Hz, 1H), 6.21 (d,  $J$  = 16.5 Hz, 1H), 5.86 (d,  $J$  = 9.8 Hz, 1H), 3.72 (t,  $J$  = 7.1 Hz, 2H), 3.20 (t,  $J$  = 7.2 Hz, 2H), 0.99 (s, 9H), 0.89 (s, 9H), 0.32 (s, 6H), 0.06 (s, 6H). <sup>13</sup>C-NMR (101 MHz, CDCl<sub>3</sub>)  $\delta$  137.7, 125.2, 62.2, 48.5, 27.2, 25.9, 25.7, 19.5, 18.3, -2.9, -5.3. LRMS (EI):  $m/z$  (%) 322 (base peak) [M – C<sub>4</sub>H<sub>9</sub>], 364 (11) [M – CH<sub>3</sub>]. HRMS (EI):  $m/z$  calculated for C<sub>15</sub>H<sub>34</sub>NO<sub>3</sub>Si<sub>2</sub>S 364.17979; found 364.1809 [M – CH<sub>3</sub>]<sup>+</sup> (error +3.0 ppm).

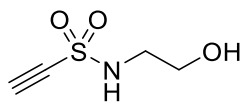

***N*-(2-Hydroxyethyl)ethynesulfonamide (5):** Prepared as shown in general procedure 5; colorless oil; eluent (EtOAc); yield, quant. FT-IR (NaCl)  $\nu$  cm<sup>-1</sup>: 3502 (m), 3234 (s), 3230 (br), 3151 (s), 3065 (w), 3029 (w), 2936 (m), 2886 (m), 2096 (s), 1604 (w), 1498 (m), 1455 (s), 1425 (m), 1331 (s), 1258 (w), 1221 (w), 1171 (s), 1112 (m), 1067 (m), 959 (m), 848 (w), 837 (w), 733 (m), 697 (s), 661 (w). <sup>1</sup>H-NMR (400 MHz, DMSO-*d*<sub>6</sub>)  $\delta$  8.40 (br, 1H), 4.99 (s, 1H), 4.83 (t,  $J$  = 5.6 Hz, 1H), 3.50 (dd,  $J$  = 11.9, 6.1 Hz, 2H), 3.03 (t,  $J$  = 6.2 Hz, 2H). <sup>13</sup>C-NMR (101 MHz, DMSO-*d*<sub>6</sub>)  $\delta$  79.8, 79.2, 59.4, 45.3. LRMS (FAB):  $m/z$  (%) 91 (base peak) [M + H – C<sub>2</sub>H<sub>6</sub>NO], 181 (21) [M + C<sub>3</sub>H<sub>8</sub>O<sub>2</sub>S – C<sub>3</sub>H<sub>7</sub>O<sub>2</sub>], 258 (16) [M

+ C<sub>3</sub>H<sub>8</sub>O<sub>2</sub>S + H]. HRMS (FAB):  $m/z$  calculated for C<sub>7</sub>H<sub>16</sub>NO<sub>5</sub>S<sub>2</sub> 258.04644; found 258.0461 [M + C<sub>3</sub>H<sub>8</sub>O<sub>2</sub>S]<sup>+</sup> (error –3.5 ppm).

Note: The exact mass of [M + H]<sup>+</sup> was measured at 5,000 resolution, including A+1 and A+2 peaks, with  $m/z$  and intensity nearly identical to theoretical values. HRMS (FAB):  $m/z$  calculated for C<sub>4</sub>H<sub>8</sub>NO<sub>3</sub>S 150.02194; found 150.0226 [M + H]<sup>+</sup> (error +0.7 ppm).

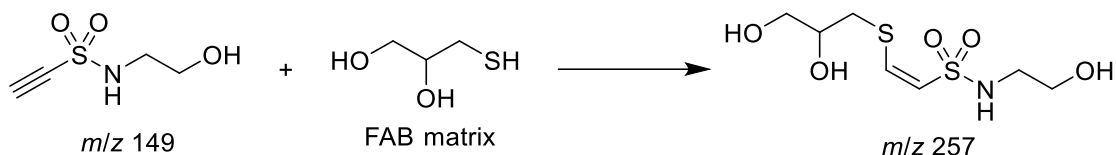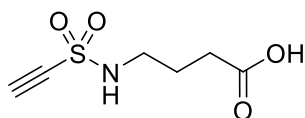

**4-(Ethynylsulfonamido)butanoic acid (6):** **2o** (410 mg, 2.0 mmol) were stirred for 24 h at room temperature in a 3:1 mixture of TFA/H<sub>2</sub>O (10 mL). After evaporation of the volatile components, the crude residue was purified by column chromatography (Hexane:Et<sub>2</sub>O:HCOOH = 1:2:0.015) to give colorless oil **6** (196 mg, 51%). FT-IR (KBr)  $\nu$  cm<sup>-1</sup>: 3280 (m), 3242 (s), 3048 (br), 2982 (w), 2945 (w), 2069 (m), 1693 (s), 1465 (w), 1441 (m), 1415 (w), 1383 (w), 1350 (m), 1280 (m), 1219 (m), 1162 (s), 1085 (m), 1035 (w), 917 (w), 889 (m), 831 (m). <sup>1</sup>H-NMR (400 MHz, DMSO-*d*<sub>6</sub>)  $\delta$  12.09 (br, 1H), 8.36 (t,  $J$  = 5.1 Hz, 1H), 4.97 (s, 1H), 2.98 (td,  $J$  = 6.9, 5.5 Hz, 2H), 2.25 (t,  $J$  = 7.3 Hz, 2H), 1.69 (quin,  $J$  = 7.2 Hz, 2H). <sup>13</sup>C-NMR (101 MHz, DMSO-*d*<sub>6</sub>)  $\delta$  173.9, 79.9, 79.1, 42.1, 30.5, 24.0. LRMS (ESI):  $m/z$  (%) 190 (74) [M – H]. HRMS (ESI):  $m/z$  calculated for C<sub>6</sub>H<sub>8</sub>NO<sub>4</sub>S 190.01740; found 190.01671 [M – H]<sup>–</sup> (error –3.66 ppm).

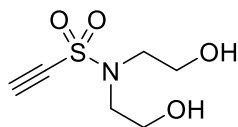

**N,N-Bis(2-((tert-butyldimethylsilyl)oxy)ethyl)ethynylsulfonamide (7):** Prepared as shown in general procedure 5; colorless oil; eluent (EtOAc); yield, quant. FT-IR (ATR)  $\nu$  cm<sup>-1</sup>: 3300 (br), 3256 (m), 2951 (w), 2066 (m), 1606 (w), 1454 (s), 1364 (s), 1285 (w), 1254 (w), 1170 (s), 1077 (m). <sup>1</sup>H-NMR (400 MHz, DMSO-*d*<sub>6</sub>)  $\delta$  5.11 (s, 1H), 4.92 (t,  $J$  = 5.5 Hz, 2H), 3.62–3.57 (dd,  $J$  = 6.3, 5.7 Hz, 4H), 3.28 (t,  $J$  = 6.2 Hz, 4H). <sup>13</sup>C-NMR (101 MHz, DMSO-*d*<sub>6</sub>)  $\delta$  81.1, 77.6, 59.1, 51.5. LRMS (EI):  $m/z$  (%) 131 [M – CH<sub>3</sub>O – CH<sub>3</sub>O] (22), 162 [M – CH<sub>3</sub>O] (base peak). HRMS (EI):  $m/z$  calculated for C<sub>5</sub>H<sub>8</sub>NO<sub>3</sub>S 162.2249; found 162.0232 [M – CH<sub>3</sub>O]<sup>+</sup> (error +4.3 ppm).

Note: Intramolecular reaction proceeds to produce **S1**.

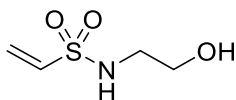

**N-(2-Hydroxyethyl)ethenesulfonamide (8)**: Prepared as shown in general procedure 5; colorless oil; eluent (Hexane:EtOAc = 1:3, v/v); yield, 92%. FT-IR (ATR)  $\nu$  cm<sup>-1</sup>: 3514 (br), 3300 (br), 3063 (w), 2936 (w), 2886 (w), 1424 (m), 1389 (m), 1328 (s), 1258 (w), 1154 (s), 1099 (m), 1060 (m), 972 (m). <sup>1</sup>H-NMR (400 MHz, DMSO-*d*<sub>6</sub>)  $\delta$  7.23 (t, *J* = 5.7 Hz, 1H), 6.70 (dd, *J* = 16.6, 10.0 Hz, 1H), 6.01 (d, *J* = 16.6 Hz, 1H), 5.95 (d, *J* = 10.0 Hz, 1H), 4.73 (t, *J* = 5.6 Hz, 1H), 3.43 (td, *J* = 6.3, 5.7 Hz, 2H), 2.87 (q, *J* = 6.2 Hz, 2H). <sup>13</sup>C-NMR (101 MHz, DMSO-*d*<sub>6</sub>)  $\delta$  137.0, 125.1, 60.1, 44.8. LRMS (EI): *m/z* (%) 60 [M – C<sub>2</sub>H<sub>3</sub>O<sub>2</sub>S] (4), 91 [M – C<sub>2</sub>H<sub>6</sub>NO] (13), 120 [M – CH<sub>3</sub>O] (46). HRMS (EI): *m/z* calculated for C<sub>3</sub>H<sub>6</sub>NO<sub>2</sub>S 120.01192; found 120.0120 [M – CH<sub>3</sub>O]<sup>+</sup> (error +0.9 ppm).

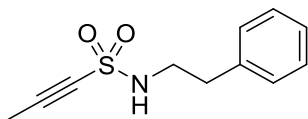

**N-Phenethylprop-1-yne-1-sulfonamide (9a)**: Prepared as shown in general procedure 4; colorless oil; eluent (Hexane:EtOAc = 2:1, v/v); yield, 51%. FT-IR (KBr)  $\nu$  cm<sup>-1</sup>: 3249 (s), 3033 (w), 2974 (w), 2937 (w), 2919 (w), 2211 (m), 1497 (w), 1468 (w), 1456 (w), 1431 (m), 1326 (s), 1163 (s), 1052 (s), 1031 (m), 942 (m), 910 (w), 771 (m), 753 (m), 705 (s), 558 (m), 497 (m). <sup>1</sup>H-NMR (400 MHz, CDCl<sub>3</sub>)  $\delta$  7.36–7.21 (m, 5H), 4.59 (t, *J* = 5.7 Hz, 1H), 3.45 (td, *J* = 6.9, 6.3 Hz, 2H), 2.94 (t, *J* = 6.9 Hz, 2H), 2.04 (s, 3H). <sup>13</sup>C-NMR (101 MHz, CDCl<sub>3</sub>)  $\delta$  137.5, 128.9, 128.8, 127.0, 88.5, 75.3, 44.6, 35.4, 3.9. LRMS (EI): *m/z* (%) 91 (78) [M – C<sub>4</sub>H<sub>6</sub>NO<sub>2</sub>S], 132 (base peak) [M – C<sub>7</sub>H<sub>7</sub>], 223 (2) [M]. HRMS (EI): *m/z* calculated for C<sub>11</sub>H<sub>13</sub>NO<sub>2</sub>S 223.06670; found 223.0665 [M]<sup>+</sup> (error – 0.8 ppm).

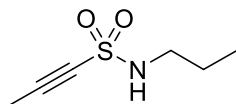

**N-Propylprop-1-yne-1-sulfonamide (9b)**: Prepared as shown in general procedure 4; colorless oil; eluent (Hexane:EtOAc = 2:1, v/v); yield, 62%. FT-IR (ATR)  $\nu$  cm<sup>-1</sup>: 3290 (br), 2970 (s), 2880 (m), 2219 (s), 1635 (w), 1460 (m), 1430 (m), 1170 (s). <sup>1</sup>H-NMR (400 MHz, CDCl<sub>3</sub>)  $\delta$  4.64 (br, 1H), 3.15 (td, *J* = 7.1, 6.2 Hz, 2H), 2.06 (s, 3H), 1.65 (sext, *J* = 7.3 Hz, 2H), 0.99 (t, *J* = 7.4 Hz, 3H). <sup>13</sup>C-NMR (101 MHz, CDCl<sub>3</sub>)  $\delta$  88.2, 75.4, 45.4, 22.6, 11.2, 3.9. LRMS (EI): *m/z* (%) 103 (32) [M – C<sub>3</sub>H<sub>8</sub>N], 132 (base peak) [M – C<sub>2</sub>H<sub>5</sub>], 146 (13) [M – CH<sub>3</sub>], 161 (11) [M]. HRMS (EI): *m/z* calculated for C<sub>6</sub>H<sub>11</sub>NO<sub>2</sub>S 161.05105; found 161.0512 [M]<sup>+</sup> (error +0.8 ppm).

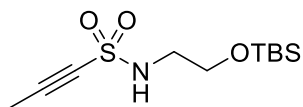

**N-(2-((*tert*-Butyldimethylsilyl)oxy)ethyl)prop-1-yne-1-sulfonamide (9c):** Prepared as shown in general procedure 4; colorless oil; eluent (Hexane:EtOAc = 4:1, v/v); yield, 37%. FT-IR (NaCl)  $\nu$  cm<sup>-1</sup>: 3627 (br), 3296 (br), 2954 (s), 2930 (s), 2884 (s), 2858 (s), 2217 (s), 1471 (m), 1464 (m), 1411 (m), 1344 (s), 1257 (s), 1169 (s), 1088 (s), 1048 (m), 1007 (w), 973 (m), 939 (m), 838 (s), 810 (m), 780 (s), 718 (w), 645 (s). <sup>1</sup>H-NMR (400 MHz, CDCl<sub>3</sub>)  $\delta$  4.96 (t,  $J$  = 5.0 Hz, 1H), 3.82–3.79 (m, 2H), 3.30–3.26 (m, 2H), 2.06 (s, 3H), 0.90 (s, 9H), 0.09 (s, 6H). <sup>13</sup>C-NMR (101 MHz, CDCl<sub>3</sub>)  $\delta$  88.4, 75.3, 60.9, 45.7, 25.8, 18.3, 3.9, -5.4. LRMS (EI):  $m/z$  (%) 206 [M – C<sub>4</sub>H<sub>9</sub> – CH<sub>3</sub>] (14), 220 [M – C<sub>4</sub>H<sub>9</sub>] (base peak), 262 [M – CH<sub>3</sub>] (6). HRMS (EI):  $m/z$  calculated for C<sub>10</sub>H<sub>20</sub>NO<sub>3</sub>SiS 262.09332; found 262.0940 [M – CH<sub>3</sub>]<sup>+</sup> (error – 2.6 ppm).

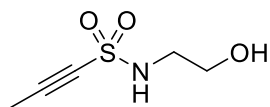

**N-(2-Hydroxyethyl)prop-1-yne-1-sulfonamide (10):** Prepared as shown in general procedure 5; colorless oil; eluent (Hexane:EtOAc = 1:3, v/v); yield, quant. FT-IR (ATR)  $\nu$  cm<sup>-1</sup>: 3532 (br), 3301 (br), 2219 (s), 1636 (w), 1434 (m), 1337 (s), 1165 (s), 1052 (m). <sup>1</sup>H-NMR (400 MHz, CDCl<sub>3</sub>)  $\delta$  5.45 (t,  $J$  = 5.4 Hz, 1H), 3.84 (dd,  $J$  = 4.7, 4.5 Hz, 2H), 3.36–3.32 (m, 2H), 2.32 (t,  $J$  = 4.4 Hz, 1H), 2.08 (s, 3H). <sup>13</sup>C-NMR (101 MHz, CDCl<sub>3</sub>)  $\delta$  89.0, 75.1, 60.9, 45.5, 3.9. LRMS (FAB):  $m/z$  (%) 146 [M + H – H<sub>2</sub>O] (30), 164 [M + H] (base peak). HRMS (FAB):  $m/z$  calculated for C<sub>5</sub>H<sub>10</sub>NO<sub>3</sub>S 164.03814; found 164.0377 [M + H]<sup>+</sup> (error – 2.9 ppm).

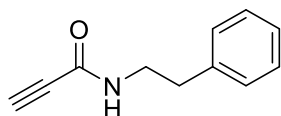

**N-Phenethylpropiolamide (13a):** Prepared as shown in general procedure 6A; pale yellow crystals; eluent (Hexane:EtOAc = 1:1, v/v); yield, 87%. FT-IR (NaCl)  $\nu$  cm<sup>-1</sup>: 3300 (m), 3274 (s), 3062 (w), 3029 (w), 2933 (w), 2109 (m), 1637 (vs), 1541 (s), 1497 (m), 1455 (m), 1362 (w), 1273 (m), 1199 (w), 747 (m), 699 (s). <sup>1</sup>H-NMR (400 MHz, CDCl<sub>3</sub>)  $\delta$  7.35–7.31 (m, 2H), 7.27–7.19 (m, 3H), 5.93 (br, 1H), 3.57 (q,  $J$  = 6.9 Hz, 2H), 2.85 (t,  $J$  = 7.0 Hz, 2H), 2.75 (s, 1H). <sup>13</sup>C-NMR (101 MHz, CDCl<sub>3</sub>)  $\delta$  152.1, 138.2, 128.8, 128.7, 126.9, 126.7, 79.2, 73.1, 44.6, 40.9, 36.9, 35.2, 34.0, 24.9. LRMS (EI):  $m/z$  (%) 53 (13) [M – C<sub>8</sub>H<sub>10</sub>N], 82 (19) [M – C<sub>7</sub>H<sub>7</sub>], 91 (22) [M – C<sub>4</sub>H<sub>4</sub>NO], 104 (base peak) [M – C<sub>3</sub>H<sub>3</sub>NO –

H], 173 (11) [M]. HRMS (EI):  $m/z$  calculated for  $C_{11}H_{11}NO$  173.08406; found 173.0841 [M]<sup>+</sup> (error +0.2 ppm).

Note: By <sup>1</sup>H NMR in CDCl<sub>3</sub>, the compound is a 91:9 mixture of amide rotamers.

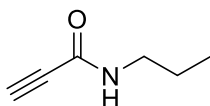

**N-Propylpropiolamide (13b):** Prepared as shown in general procedure 6A; colorless oil; vacuum distillation (105 – 107 °C/1.6 kPa); yield, 58%. FT-IR (NaCl)  $\nu$  cm<sup>-1</sup>: 3250 (br), 3064 (w), 2966 (w), 2876 (w), 2108 (m), 1630 (vs), 1537 (s), 1452 (m), 1273 (s), 1150 (w), 942 (w). <sup>1</sup>H-NMR (400 MHz, CDCl<sub>3</sub>, major rotamer)  $\delta$  6.01 (br, 1H), 3.28 (td,  $J$  = 7.1, 6.1 Hz, 2H), 2.78 (s, 1H), 1.57 (sext,  $J$  = 7.3 Hz, 2H), 0.96 (t,  $J$  = 7.4 Hz, 3H). <sup>13</sup>C-NMR (101 MHz, CDCl<sub>3</sub>, major rotamer)  $\delta$  152.2, 79.2, 72.9, 41.6, 22.5, 11.3. LRMS (EI):  $m/z$  (%) 82 (14) [M – C<sub>2</sub>H<sub>5</sub>], 96 (34) [M – CH<sub>3</sub>], 111 (17) [M]. HRMS (EI):  $m/z$  calculated for  $C_6H_9NO$  111.06841; found 111.0688 [M]<sup>+</sup> (error +3.6 ppm).

Note: By <sup>1</sup>H NMR in CDCl<sub>3</sub>, the compound is a 90:10 mixture of amide rotamers. By <sup>1</sup>H NMR in DMSO-*d*<sub>6</sub>, the compound is a 94:6 mixture of amide rotamers.

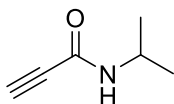

**N-Isopropylpropiolamide (13c):** Prepared as shown in general procedure 6A; off-white crystals; eluent (Hexane:EtOAc = 2:1, v/v); yield, 43%. UV (abs)  $\lambda_{max}$ : 220 nm (5%v/v MeCN in Water). FT-IR (KBr)  $\nu$  cm<sup>-1</sup>: 3205 (s), 3061 (m), 2980 (m), 2938 (w), 2826 (w), 2102 (s), 1643 (s), 1558 (s), 1468 (w), 1288 (m), 1156 (w), 979 (w), 921 (w), 762 (w), 719 (m), 608 (w). <sup>1</sup>H-NMR (400 MHz, CDCl<sub>3</sub>, major rotamer)  $\delta$  5.78 (br, 1H), 4.18–4.07 (m, 1H), 2.75 (s, 1H), 1.19 (d,  $J$  = 6.6 Hz, 6H). <sup>13</sup>C-NMR (101 MHz, CDCl<sub>3</sub>, major rotamer)  $\delta$  151.3, 77.5, 72.6, 42.1, 22.4. LRMS (EI):  $m/z$  (%) 82 (base peak) [M – C<sub>2</sub>H<sub>5</sub>], 95 (2) [M – CH<sub>3</sub>]. HRMS (EI):  $m/z$  calculated for  $C_4H_4NO$  82.0; found 82.0295 [M – C<sub>3</sub>H<sub>5</sub>]<sup>+</sup> (error +2.3 ppm).

Note: <sup>1</sup>H NMR in CDCl<sub>3</sub>, the compound is a 91:9 mixture of amide rotamers.

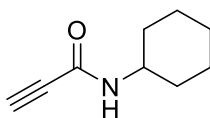

**N-Cyclohexylpropiolamide (13d):** Prepared as shown in general procedure 6A; pale yellow crystals; eluent (Hexane:EtOAc = 3:1, v/v); yield, 43%. UV (abs)  $\lambda_{\text{max}}$ : 220 nm (5%v/v MeCN in Water). FT-IR (NaCl)  $\nu$   $\text{cm}^{-1}$ : 3301 (m), 3225 (m), 2933 (s), 2855 (m), 2104 (m), 1698 (s), 1631 (s), 1526 (s), 1452 (m), 1347 (m), 1236 (m), 1081 (w), 893 (w), 724 (m).  $^1\text{H}$ -NMR (400 MHz,  $\text{CDCl}_3$ , major rotamer)  $\delta$  5.83 (br, 1H), 3.87–3.67 (m, 1H), 2.76 (s, 1H), 1.99–1.92 (m, 2H), 1.78–1.70 (m, 2H), 1.66–1.59 (m, 1H), 1.42–1.28 (m, 2H), 1.26–1.12 (m, 3H).  $^{13}\text{C}$ -NMR (101 MHz,  $\text{CDCl}_3$ , major rotamer)  $\delta$  151.2, 77.6, 72.7, 48.9, 32.7, 25.4, 24.7. LRMS (EI):  $m/z$  (%) 53 (21) [ $\text{M} - \text{C}_6\text{H}_{12}\text{N}$ ], 70 (base peak) [ $\text{M} - \text{C}_3\text{HO} - \text{C}_2\text{H}_4$ ], 108 (79) [ $\text{M} - \text{C}_3\text{H}_7$ ], 151 (14) [ $\text{M}$ ]. HRMS (EI):  $m/z$  calculated for  $\text{C}_9\text{H}_{13}\text{NO}$  151.09971; found 151.0997 [ $\text{M}$ ]<sup>+</sup> (error +0.0 ppm).

Note:  $^1\text{H}$  NMR in  $\text{CDCl}_3$ , the compound is a 89:11 mixture of amide rotamers. McLafferty rearrangement.

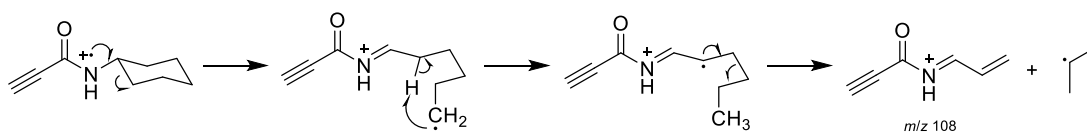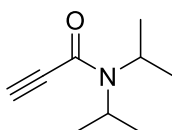

**N,N-Diisopropylpropiolamide (13e):** Prepared as shown in general procedure 3B; colorless needles; eluent (Hexane:EtOAc = 3:1, v/v); yield, 77%. UV (abs)  $\lambda_{\text{max}}$ : 234 nm (5%v/v MeCN in Water). FT-IR (KBr)  $\nu$   $\text{cm}^{-1}$ : 3186 (s), 3003 (m), 2979 (s), 2936 (m), 2873 (w), 2091 (s), 1616 (s), 1446 (m), 1379 (m), 1370 (s), 1330 (s), 1208 (s), 1155 (m), 946 (w), 886 (w), 8957 (w), 774 (m), 741 (m), 588 (m).  $^1\text{H}$ -NMR (400 MHz,  $\text{CDCl}_3$ )  $\delta$  4.60 (sep,  $J$  = 6.8 Hz, 1H), 3.60 (sep,  $J$  = 6.8 Hz, 1H), 3.03 (s, 1H), 1.39 (d,  $J$  = 6.8 Hz, 6H), 1.25 (d,  $J$  = 6.8 Hz, 6H).  $^{13}\text{C}$ -NMR (101 MHz,  $\text{CDCl}_3$ )  $\delta$  152.3, 77.2, 77.1, 50.6, 45.8, 20.8, 19.9. LRMS (EI):  $m/z$  (%) 53 (20) [ $\text{M} - \text{C}_6\text{H}_{14}\text{N}$ ], 96 (base peak) [ $\text{M} - \text{C}_3\text{H}_7 - \text{CH}_3 + \text{H}$ ], 110 (37) [ $\text{M} - \text{C}_3\text{H}_7$ ], 138 (49) [ $\text{M} - \text{CH}_3$ ], 153 (36) [ $\text{M}$ ]. HRMS (EI):  $m/z$  calculated for  $\text{C}_9\text{H}_{15}\text{NO}$  153.11536; found 153.1149 [ $\text{M}$ ]<sup>+</sup> (error –3.0 ppm).

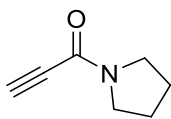

**1-(Pyrrolidin-1-yl)prop-2-yn-1-one (13f):** Prepared as shown in general procedure 6A; white crystals; eluent (Hexane:EtOAc = 1:1, v/v); yield, 85%. FT-IR (NaCl)  $\nu$   $\text{cm}^{-1}$ : 3180 (s), 2978 (w), 2884 (w), 2099 (s), 1640 (s), 1618 (vs), 1460 (w), 1431 (s), 1338 (w), 1192 (w), 780 (m), 727 (m), 641 (w).  $^1\text{H}$ -NMR (400 MHz,  $\text{CDCl}_3$ )  $\delta$  3.68–3.65 (m, 2H), 3.51–3.47 (m, 2H), 3.05 (s, 1H), 2.00–1.89 (m, 4H).  $^{13}\text{C}$ -NMR (101 MHz,  $\text{CDCl}_3$ )  $\delta$  151.4, 77.1, 76.8, 48.1, 45.3, 25.3, 24.6. LRMS (EI):  $m/z$  (%) 53 (15)  $[\text{M} - \text{C}_4\text{H}_8\text{N}]$  70 (26)  $[\text{M} - \text{C}_3\text{HO}]$ , 95 (21)  $[\text{M} - \text{C}_2\text{H}_4]$ , 108 (11)  $[\text{M} - \text{CH}_3]$ , 122 (71)  $[\text{M} - \text{H}]$ , 123 (base peak)  $[\text{M}]$ . HRMS (EI):  $m/z$  calculated for  $\text{C}_7\text{H}_9\text{NO}$  123.06841; found 123.0688  $[\text{M}]^+$  (error +3.0 ppm).

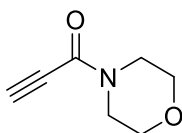

**1-Morpholinoprop-2-yn-1-one (13g):** Prepared as shown in general procedure 6A; white crystals; eluent (Hexane:EtOAc = 1:1, v/v); yield, 93%. UV (abs)  $\lambda_{\text{max}}$ : 236 nm (5%v/v MeCN in Water). FT-IR (KBr)  $\nu$   $\text{cm}^{-1}$ : 3181 (m), 2979 (w), 2926 (w), 2867 (w), 2103 (m), 1360 (s), 1442 (m), 1360 (w), 1331 (w), 1273 (m), 1240 (m), 1114 (m), 1039 (m), 959 (w), 844 (w), 774 (w), 745 (w), 557 (m).  $^1\text{H}$ -NMR (400 MHz,  $\text{CDCl}_3$ )  $\delta$  3.80–3.77 (m, 2H), 3.74–3.64 (m, 6H), 3.17 (s, 1H).  $^{13}\text{C}$ -NMR (101 MHz,  $\text{CDCl}_3$ )  $\delta$  151.9, 79.7, 75.0, 66.8, 66.3, 47.2, 41.9. LRMS (EI):  $m/z$  (%) 53 (80)  $[\text{M} - \text{C}_4\text{H}_8\text{NO}]$ , 86 (76)  $[\text{M} - \text{C}_3\text{HO}]$ , 124 (26)  $[\text{M} - \text{CH}_3]$ , 139 (base peak)  $[\text{M}]$ . HRMS (EI):  $m/z$  calculated for  $\text{C}_7\text{H}_9\text{NO}$  139.06333; found 139.0633  $[\text{M}]^+$  (error –0.4 ppm).

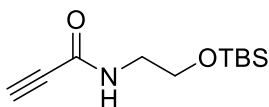

**N-(2-((*tert*-Butyldimethylsilyl)oxy)ethyl)propiolamide (13h):** 2-Aminoethanol (605  $\mu\text{L}$ , 10 mmol), DMAP (12 mg, 1.0 mol%),  $\text{Et}_3\text{N}$  (1.1 mL, 1.5 equiv.), and *t*-butyldimethylsilyl (TBS) chloride (1.8 g, 1.2 equiv.) were added to DCM (40 mL) at 0  $^\circ\text{C}$  under  $\text{N}_2$  and stirred for 1 hour. After added saturated  $\text{NaHCO}_3$  aqueous solution (100 mL). The reaction mixture was washed three times with distilled water, and the organic layer was dried over  $\text{Na}_2\text{SO}_4$ . After concentration. The reaction mixture, propiolic acid (**11**, 680  $\mu\text{L}$ , 11 mmol) and DMAP (12.2 mg, 1.0 mol%) were added to DCM (20 mL) followed by and the solution was cooled to 0  $^\circ\text{C}$ . To this, a solution of DCC (2.27 g, 11 mmol, 1.1 equiv.) in DCM (20 mL) was added dropwise and the reaction was then allowed to warm to room temperature and stirred for 3 hour. Once complete, the reaction mixture was filtered through Celite, and the solvent

was then removed in vacuo. After concentration, chromatography was performed on the residue on a silica gel column eluent (Hexane:EtOAc = 3:1, v/v) to give yellow oil **13h** (820 mg, 36%). <sup>1</sup>H-NMR (400 MHz, DMSO-*d*<sub>6</sub>)  $\delta$  8.35 (br, 1H), 3.89 (s, 1H), 3.60 (t, *J* = 6.2 Hz, 2H), 3.18 (q, *J* = 6.1 Hz, 2H), 0.87 (s, 9H), 0.04 (s, 5H). <sup>13</sup>C-NMR (101 MHz, DMSO-*d*<sub>6</sub>)  $\delta$  151.4, 78.0, 74.7, 60.5, 41.1, 25.4, 17.5, -5.8. LRMS (ESI): *m/z* (%) 250 (base peak) [M + Na], 282 (16) [M + MeOH + Na]. HRMS (ESI): *m/z* calculated for C<sub>11</sub>H<sub>21</sub>NO<sub>2</sub>NaSi 250.12392; found 250.12356 [M + Na]<sup>+</sup> (error -1.47 ppm).

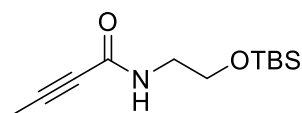

**N-(2-((*tert*-Butyldimethylsilyl)oxy)ethyl)but-2-ynamide (14):** **12** instead of **11** in method **13h**; colorless oil; eluent (Hexane:EtOAc = 3:1, v/v); yield, 45%. FT-IR (NaCl)  $\nu$  cm<sup>-1</sup>: 3276 (br), 3066 (w), 2953 (m), 2929 (m), 2883 (m), 2857 (m), 2257 (w), 2233 (w), 1631 (s), 1541 (m), 1471 (w), 1292 (m), 1253 (m), 1098 (s), 1007 (w), 939 (w), 877 (w), 834 (s), 775 (s). <sup>1</sup>H-NMR (400 MHz, DMSO-*d*<sub>6</sub>, 393 K)  $\delta$  7.78 (br, 1H), 3.60 (t, *J* = 6.2 Hz, 2H), 3.18 (br, 2H), 2.85 (m, 2H), 1.91 (s, 3H), 0.87 (s, 9H), 0.04 (s, 6H). <sup>13</sup>C-NMR (101 MHz, DMSO-*d*<sub>6</sub>, 393 K)  $\delta$  152.5, 82.1, 75.5, 60.9, 41.2, 25.7, 17.9, 2.9, -5.4. LRMS (EI): *m/z* (%) 67 (29) [M - C<sub>8</sub>H<sub>20</sub>NOSi], 184 (base peak) [M - C<sub>4</sub>H<sub>9</sub>], 226 (8) [M - CH<sub>3</sub>]. HRMS (EI): *m/z* calculated for C<sub>11</sub>H<sub>20</sub>NO<sub>2</sub>Si 226.12633; found 226.1264 [M - CH<sub>3</sub>]<sup>+</sup> (error +0.3 ppm).

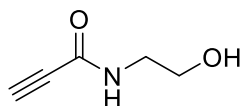

**N-(2-Hydroxyethyl)propiolamide (15):** Prepared as shown in general procedure 5; white solids; eluent (EtOAc); yield, quant. FT-IR (NaCl)  $\nu$  cm<sup>-1</sup>: 3255 (br), 3248 (s), 3059 (s), 2991 (w), 2963 (w), 2925 (w), 2878 (w), 2015 (m), 1634 (s), 1576 (m), 1463 (w), 1434 (m), 1353 (w), 1302 (m), 1260 (w), 1223 (w), 1107 (m), 1083 (w), 1055 (m), 913 (w), 848 (w), 810 (w), 726 (m), 694 (w). <sup>1</sup>H-NMR (400 MHz, DMSO-*d*<sub>6</sub>, major rotamer)  $\delta$  8.67 (br, 1H), 4.70 (t, *J* = 5.5 Hz, 1H), 4.09 (s, 1H), 3.39 (q, *J* = 6.0 Hz, 2H), 3.13 (q, *J* = 6.0 Hz, 2H). <sup>13</sup>C-NMR (101 MHz, DMSO-*d*<sub>6</sub>, major rotamer)  $\delta$  151.4, 78.1, 74.7, 59.0, 41.5. LRMS (ESI): *m/z* (%) 136 (22) [M + Na], 249 (12) [2M + Na] HRMS (ESI): *m/z* calculated for C<sub>5</sub>H<sub>7</sub>NO<sub>2</sub>Na 136.03745; found 136.03691 [M + Na]<sup>+</sup> (error -3.96 ppm).

Note: By <sup>1</sup>H NMR in DMSO-*d*<sub>6</sub>, the compound is a 95:5 mixture of amide rotamers.

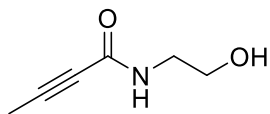

**N-(2-Hydroxyethyl)but-2-ynamide (16):** Prepared as shown in general procedure 5; white solids; eluent (EtOAc); yield, quant. FT-IR (ATR)  $\nu$   $\text{cm}^{-1}$ : 3278 (br), 3070 (w), 2931 (w), 2879 (w), 2260 (m), 2233 (m), 1635 (s), 1556 (m), 1439 (w), 1300 (m), 1069 (m).  $^1\text{H-NMR}$  (400 MHz,  $\text{DMSO-}d_6$ , 373 K)  $\delta$  7.89 (br, 1H), 4.27 (br, 1H), 3.42 (q,  $J = 5.8$  Hz, 2H), 3.14 (q,  $J = 5.7$  Hz, 2H), 2.96 (s, 2H), 1.92 (s, 3H).  $^{13}\text{C-NMR}$  (101 MHz,  $\text{DMSO-}d_6$ , 393 K)  $\delta$  152.2, 81.4, 75.2, 59.1, 41.4, 2.1. LRMS (EI):  $m/z$  (%) 67 (base peak)  $[\text{M} - \text{C}_2\text{H}_6\text{NO}]$ , 96 (47)  $[\text{M} - \text{CH}_3\text{O}]$ , 109 (6)  $[\text{M} - \text{H}_2\text{O}]$ . HRMS (EI):  $m/z$  calculated for  $\text{C}_6\text{H}_7\text{NO}$  109.05276; found 109.0532  $[\text{M} - \text{H}_2\text{O}]^+$  (error +4.1 ppm).

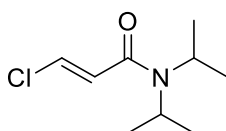

**(E)-3-Chloro-N,N-diisopropylacrylamide (17 (E)):** To a stirred solution of **11** (5.0 mmol) and dry DMF (0.97 mL, 1.5 equiv.) in dry DCM (15 mL),  $(\text{COCl})_2$  (2.45 mL, 2 M solution in DCM, 0.98 equiv.) was added at 0 °C. The reaction mixture was then stirred for 3 hours at room temperature. To a stirred solution of DIPA (2.1 mL, 3.0 equiv.) in DCM (5.0 mL), the reaction mixture was added dropwise over 10 minutes at 0 °C, was then stirred for 3 hours. The mixture was quenched with distilled water. The reaction mixture was washed with 5% NaOH aqueous solution, 1 M HCl aqueous solution, and brine. The organic layer was dried over  $\text{Na}_2\text{SO}_4$ . After concentration, chromatography was performed on the residue on a silica gel column (Hexane:EtOAc = 3:1, v/v) to give colorless oil **17 (E)** (545 mg, 57%). FT-IR (NaCl)  $\nu$   $\text{cm}^{-1}$ : 2970 (m), 2934 (w), 1637 (vs), 1584 (s), 1442 (s), 1372 (m), 1332 (s), 1206 (w), 1134 (w), 1045 (w), 930 (w), 859 (w), 740 (m), 607 (w).  $^1\text{H-NMR}$  (400 MHz,  $\text{CDCl}_3$ )  $\delta$  7.17 (d,  $J = 12.8$  Hz, 1H), 6.65 (d,  $J = 12.8$  Hz, 1H), 3.95 (br, 1H), 3.77 (br, 1H), 1.35 (br, 6H), 1.27 (br, 6H).  $^{13}\text{C-NMR}$  (101 MHz,  $\text{CDCl}_3$ )  $\delta$  163.4, 133.1, 126.7, 48.3, 45.9, 21.4, 20.5. LRMS (EI):  $m/z$  (%) 61 (3)  $[\text{M} - \text{C}_7\text{H}_{14}\text{NO}]$ , 86 (base peak)  $[\text{M} - \text{C}_2\text{H}_2\text{Cl} - \text{C}_3\text{H}_7 + \text{H}]$ , 89 (32)  $[\text{M} - \text{C}_6\text{H}_{14}\text{N}]$ , 132 (11)  $[\text{M} - \text{C}_3\text{H}_7 - \text{CH}_3]$ , 146 (14)  $[\text{M} - \text{C}_3\text{H}_7]$ , 154 (51)  $[\text{M} - \text{Cl}]$ , 174 (11)  $[\text{M} - \text{CH}_3]$ , 189 (3)  $[\text{M}]$ . HRMS (EI):  $m/z$  calculated for  $\text{C}_9\text{H}_{16}\text{NOCl}$  189.09204; found 189.0927  $[\text{M}]^+$  (error +3.6 ppm).

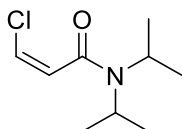

**(Z)-3-Chloro-N,N-diisopropylacrylamide (17 (Z)):** Prepared as shown in **17 (Z)**; colorless crystals; eluent (Hexane:EtOAc = 1:1, v/v); yield, 20%. FT-IR (NaCl)  $\nu$   $\text{cm}^{-1}$ : 2972 (m), 2935 (w), 1634 (vs), 1473 (w), 1443 (s), 1371 (m), 1348 (s), 1297 (m), 1214 (w), 1156 (w), 1135 (m), 1045 (w), 830 (w),

715 (w).  $^1\text{H-NMR}$  (400 MHz,  $\text{CDCl}_3$ )  $\delta$  6.33 (d,  $J = 7.9$  Hz, 1H), 6.28 (d,  $J = 7.9$  Hz, 1H), 4.04 (sep,  $J = 6.8$  Hz, 1H), 3.52 (sep,  $J = 6.8$  Hz, 1H), 1.46 (d,  $J = 6.8$  Hz, 6H), 1.21 (d,  $J = 6.8$  Hz, 6H).  $^{13}\text{C-NMR}$  (101 MHz,  $\text{CDCl}_3$ )  $\delta$  164.0, 127.2, 121.5, 50.3, 45.8, 21.1, 20.4. LRMS (EI):  $m/z$  (%) 61 (3) [ $\text{M} - \text{C}_7\text{H}_{14}\text{NO}$ ], 86 (base peak) [ $\text{M} - \text{C}_2\text{H}_2\text{Cl} - \text{C}_3\text{H}_7 + \text{H}$ ], 89 (31) [ $\text{M} - \text{C}_6\text{H}_{14}\text{N}$ ], 132 (14) [ $\text{M} - \text{C}_3\text{H}_7 - \text{CH}_3$ ], 146 (18) [ $\text{M} - \text{C}_3\text{H}_7$ ], 154 (53) [ $\text{M} - \text{Cl}$ ], 174 (8) [ $\text{M} - \text{CH}_3$ ], 189 (3) [ $\text{M}$ ]. HRMS (EI):  $m/z$  calculated for  $\text{C}_9\text{H}_{16}\text{NOCl}$  189.09204; found 189.0927 [ $\text{M}$ ] $^+$  (error +0.5 ppm).

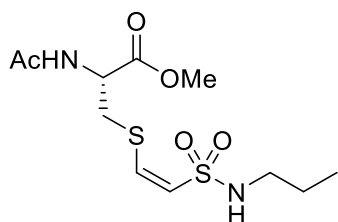

**Methyl (Z)-N-acetyl-S-(2-(N-propylsulfamoyl)vinyl)-L-cysteinate (2c-Cys):** Prepared as shown in general procedure 7; colorless crystals; silica gel column eluent (Hexane:EtOAc = 1:3, v/v); yield, 20% (isolated). FT-IR (NaCl)  $\nu$   $\text{cm}^{-1}$ : 3567 (br), 3287 (br), 3147 (w), 2965 (m), 2936 (w), 2877 (w), 2253 (w), 1742 (s), 1662 (s), 1553 (s), 1437 (m), 1374 (m), 1317 (s), 1220 (m), 1136 (s), 1076 (w), 1005 (w), 916 (w), 840 (w), 732 (m), 697 (m), 631 (w).  $^1\text{H-NMR}$  (400 MHz,  $\text{CDCl}_3$ )  $\delta$  6.93 (d,  $J = 10.2$  Hz, 1H), 6.43 (d,  $J = 6.8$  Hz, 1H), 6.18 (d,  $J = 10.2$  Hz, 1H), 4.86 (dt,  $J = 7.0, 4.6$  Hz, 1H), 4.60 (t,  $J = 6.2$  Hz, 1H), 3.80 (s, 3H), 3.32 (dd,  $J = 14.4, 4.8$  Hz, 1H), 3.27 (dd,  $J = 14.4, 4.3$  Hz, 1H), 3.03 (dt,  $J = 7.1, 6.3$  Hz, 2H), 2.06 (s, 3H), 1.60 (sext,  $J = 7.1$  Hz, 2H), 0.96 (t,  $J = 7.4$  Hz, 3H).  $^{13}\text{C-NMR}$  (101 MHz,  $\text{CDCl}_3$ )  $\delta$  170.2, 170.1, 143.2, 122.4, 53.1, 52.7, 44.7, 37.9, 23.3, 23.1, 11.2. LRMS (EI):  $m/z$  (%) 43 (54) [ $\text{M} - \text{C}_8\text{H}_{13}\text{N}_2\text{O}_5\text{S}_2$ ], 58 (22) [ $\text{M} - \text{C}_8\text{H}_{12}\text{NO}_5\text{S}_2$ ], 143 (55) [ $\text{M} - \text{C}_2\text{H}_3\text{O}_2 - \text{C}_3\text{H}_8\text{NO}_2\text{S}$ ], 207 (base peak) [ $\text{M} - \text{C}_2\text{H}_3\text{O}_2 - \text{C}_3\text{H}_8\text{N}$ ], 236 (76) [ $\text{M} - \text{C}_2\text{H}_3\text{O}_2 - \text{C}_2\text{H}_5$ ], 265 (44) [ $\text{M} - \text{C}_2\text{H}_3\text{O}_2$ ], 295 (3) [ $\text{M} - \text{C}_2\text{H}_5$ ], 324 (6) [ $\text{M}$ ]. HRMS (EI):  $m/z$  calculated for  $\text{C}_{11}\text{H}_{20}\text{N}_2\text{O}_5\text{S}_2$  324.08135; found 324.0810 [ $\text{M}$ ] $^+$  (error -1.1 ppm).

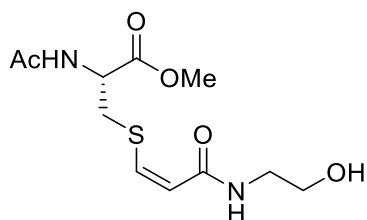

**Methyl (Z)-N-acetyl-S-(3-((2-hydroxyethyl)amino)-3-oxoprop-1-en-1-yl)-L-cysteinate (15-Cys):** Prepared as shown in general procedure 7; colorless crystals; silica gel column eluent ( $\text{CHCl}_3$ /Acetone = 1:1, v/v); yield, 13% (isolated). FT-IR (ATR)  $\nu$   $\text{cm}^{-1}$ : 3303 (br), 3075 (w), 3931 (w), 1744 (s), 1645 (s), 1578 (s), 1540 (s), 1437 (m), 1375 (m), 1263 (m), 1221 (m), 1064 (m).  $^1\text{H-NMR}$  (400 MHz,  $\text{CDCl}_3$ )  $\delta$  6.82 (d,  $J = 7.5$  Hz, 1H), 6.76 (d,  $J = 9.9$  Hz, 1H), 6.45 (t,  $J = 5.6$  Hz, 1H), 5.84 (d,  $J = 9.9$

Hz, 1H), 4.87 (dt,  $J = 7.5, 4.8$  Hz, 1H), 3.77 (s, 3H), 3.73 (d,  $J = 4.1$  Hz, 2H), 3.45 (td,  $J = 5.5, 4.7$  Hz, 2H), 3.33 (br, 1H), 3.27–3.18 (m, 2H), 2.04 (s, 3H).  $^{13}\text{C}$ -NMR (101 MHz,  $\text{CDCl}_3$ )  $\delta$  170.8, 170.4, 167.1, 144.7, 116.3, 61.9, 52.9, 52.5, 42.2, 38.3, 23.0. LRMS (EI):  $m/z$  (%) 313 (base peak)  $[\text{M} + \text{Na}]$ . HRMS (ESI):  $m/z$  calculated for  $\text{C}_{11}\text{H}_{18}\text{N}_2\text{O}_5\text{NaS}$  313.08341; found 313.08239  $[\text{M} + \text{Na}]^+$  (error  $-3.26$  ppm).

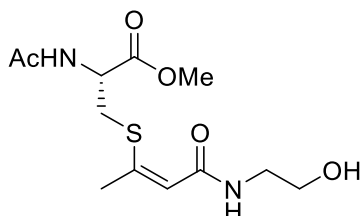

**Methyl (Z)-N-acetyl-S-(4-((2-hydroxyethyl)amino)-4-oxobut-2-en-2-yl)-L-cysteinate (16-Cys (Z))**: Prepared as shown in general procedure 7; colorless crystals; silica gel column eluent ( $\text{CHCl}_3/\text{MeOH} = 100:5$ , v/v); yield, 72% (isolated). FT-IR (KBr)  $\nu$   $\text{cm}^{-1}$ : 3523 (m), 1401 (m), 3285 (br), 3077 (m), 2956 (m), 2886 (w), 1761 (m), 1737 (s), 1646 (s), 1631 (s), 1581 (s), 1552 (s), 1454 (m), 1438 (m), 1416 (m), 1372 (m), 1359 (m), 1372 (m), 1358 (m), 1300 (m), 1238 (s), 1198 (m), 1182 (m).  $^1\text{H}$ -NMR (400 MHz,  $\text{DMSO}-d_6$ )  $\delta$  8.49 (d,  $J = 7.7$  Hz, 1H), 7.73 (t,  $J = 5.7$  Hz, 1H), 5.85 (s, 1H), 4.65 (t,  $J = 5.4$  Hz, 1H), 4.38–4.33 (m, 1H), 3.65 (s, 3H), 3.37 (q,  $J = 5.9$  Hz, 2H), 3.21 (dd,  $J = 13.3, 5.0$  Hz, 1H), 3.10 (q,  $J = 6.0$  Hz, 2H), 2.98 (dd,  $J = 13.3, 8.9$  Hz, 1H), 2.12 (s, 3H), 1.86 (s, 3H).  $^{13}\text{C}$ -NMR (101 MHz,  $\text{DMSO}-d_6$ )  $\delta$  171.0, 169.5, 165.3, 148.3, 116.2, 60.0, 52.4, 52.2, 41.2, 30.5, 23.2, 22.3. LRMS (ESI):  $m/z$  (%) 160 (18)  $[\text{M} - \text{C}_6\text{H}_{10}\text{NO}_3]$ , 327 (base peak)  $[\text{M} + \text{Na}]$ , 631 (6)  $[2\text{M} + \text{Na}]$ . HRMS (ESI):  $m/z$  calculated for  $\text{C}_{12}\text{H}_{20}\text{N}_2\text{O}_5\text{NaS}$  327.09906; found 327.09864  $[\text{M} + \text{Na}]^+$  (error  $-1.27$  ppm).

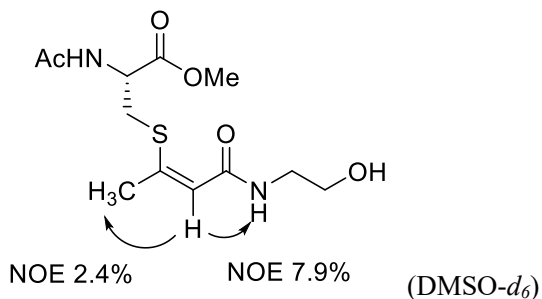

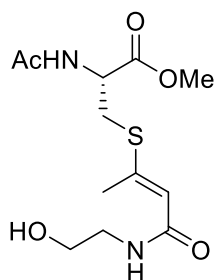

**Methyl (E)-N-acetyl-S-(4-((2-hydroxyethyl)amino)-4-oxobut-2-en-2-yl)-L-cysteinate (16-Cys (E)):** Prepared as shown in general procedure 7; colorless crystals; silica gel column eluent (CHCl<sub>3</sub>/MeOH = 95:5, v/v); yield, 5% (isolated). FT-IR (ATR)  $\nu$  cm<sup>-1</sup>: 3291 (br), 3072 (w), 2930 (m), 1746 (s), 1645 (s), 1601 (s), 1540 (s), 1437 (m), 1377 (m), 1247 (m). <sup>1</sup>H-NMR (400 MHz, CDCl<sub>3</sub>)  $\delta$  6.63 (d,  $J$  = 7.4 Hz, 1H), 6.57 (t,  $J$  = 5.4 Hz, 1H), 5.78 (s, 1H), 4.86–4.81 (m, 1H), 3.80 (s, 3H), 3.73 (t,  $J$  = 4.9 Hz, 2H), 3.44 (td,  $J$  = 5.7, 3.9 Hz, 2H), 3.21 (dd,  $J$  = 14.1, 6.5 Hz, 1H), 3.16 (dd,  $J$  = 14.2, 4.9 Hz, 1H), 2.40 (s, 3H), 2.17 (s, 1H), 2.04 (s, 3H). <sup>13</sup>C-NMR (101 MHz, CDCl<sub>3</sub>)  $\delta$  170.9, 170.6, 166.4, 151.0, 112.9, 62.5, 53.0, 51.3, 42.3, 32.8, 23.1, 20.0. LRMS (ESI):  $m/z$  (%) 160 (16) [M – C<sub>6</sub>H<sub>10</sub>NO<sub>3</sub>], 327 (base peak) [M + Na], 631 (6) [2M + Na]. HRMS (ESI):  $m/z$  calculated for C<sub>12</sub>H<sub>20</sub>N<sub>2</sub>O<sub>5</sub>NaS 327.09906; found 327.09772 [M + Na]<sup>+</sup> (error –4.10 ppm).

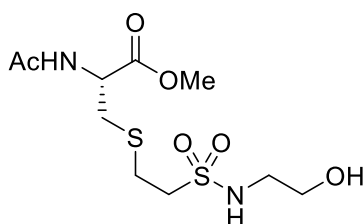

**Methyl N-acetyl-S-(2-(N-(2-hydroxyethyl)sulfamoyl)ethyl)-L-cysteinate (8-Cys):** Prepared as shown in general procedure 7; colorless crystals; silica gel column eluent (CHCl<sub>3</sub>/MeOH = 95:5, v/v); yield, 61% (isolated). FT-IR (ATR)  $\nu$  cm<sup>-1</sup>: 3342 (br), 2955 (m), 1746 (s), 1660 (s), 1542 (m), 1438 (m), 1376 (m), 1325 (s), 1220 (m), 1147 (s). <sup>1</sup>H-NMR (400 MHz, CDCl<sub>3</sub>)  $\delta$  6.46 (d,  $J$  = 7.5 Hz, 1H), 5.04 (t,  $J$  = 5.9 Hz, 1H), 4.85–4.80 (m, 1H), 3.81 (s, 3H), 3.77 (dd,  $J$  = 9.9, 5.1 Hz, 2H), 3.34–3.29 (m, 4H), 3.12 (t,  $J$  = 5.3 Hz, 1H), 3.09–2.89 (m, 4H), 2.08 (s, 3H). <sup>13</sup>C-NMR (101 MHz, DMSO-*d*<sub>6</sub>)  $\delta$  171.2, 169.5, 79.2, 60.5, 52.1, 51.9, 51.5, 44.9, 32.6, 25.0, 22.3. LRMS (EI):  $m/z$  (%) 144 (base peak) [M – C<sub>4</sub>H<sub>10</sub>NO<sub>3</sub>S<sub>2</sub>], 204 (41) [M – C<sub>2</sub>H<sub>6</sub>NO<sub>6</sub>S], 238 (3) [M – C<sub>2</sub>H<sub>3</sub>O<sub>2</sub> – CH<sub>3</sub>O], 269 (8) [M – C<sub>2</sub>H<sub>3</sub>O<sub>2</sub>], 283 (3) [M – C<sub>2</sub>H<sub>6</sub>O], 297 (5) [M – CH<sub>3</sub>O]. HRMS (EI):  $m/z$  calculated for C<sub>9</sub>H<sub>17</sub>N<sub>2</sub>O<sub>5</sub>S<sub>2</sub> 297.05789; found 297.0576 [M – CH<sub>3</sub>O]<sup>+</sup> (error –1.1 ppm).

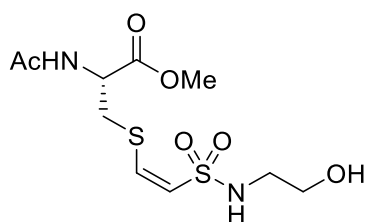

**Methyl (Z)-N-acetyl-S-(2-(N-(2-hydroxyethyl)sulfamoyl)vinyl)-L-cysteinate (5-Cys):** Prepared as shown in general procedure 7; colorless crystals; silica gel column eluent ( $\text{CHCl}_3/\text{MeOH} = 95:5$ , v/v); yield, 39% (isolated). FT-IR (ATR)  $\nu \text{ cm}^{-1}$ : 3505 (br), 3298 (br), 2963 (m), 1742 (s), 1660 (s), 1556 (s), 1437 (m), 1375 (m), 1318 (s), 1263 (m), 1221 (m), 1143 (s), 1098 (m), 1054 (m).  $^1\text{H-NMR}$  (400 MHz,  $\text{DMSO-}d_6$ )  $\delta$  8.47 (d,  $J = 7.9$  Hz, 1H), 7.22 (d,  $J = 10.3$  Hz, 1H), 7.16 (t,  $J = 5.9$  Hz, 1H), 6.22 (d,  $J = 10.3$  Hz, 1H), 4.71 (t,  $J = 5.5$  Hz, 1H), 4.48 (td,  $J = 8.3, 5.1$  Hz, 1H), 3.65 (s, 3H), 3.42 (dd,  $J = 11.6, 6.1$  Hz, 2H), 3.20 (dd,  $J = 14.0, 5.1$  Hz, 1H), 3.04 (dd,  $J = 14.0, 8.7$  Hz, 1H), 2.88 (q,  $J = 6.2$  Hz, 2H), 1.86 (s, 3H).  $^{13}\text{C-NMR}$  (101 MHz,  $\text{DMSO-}d_6$ )  $\delta$  170.8, 169.6, 142.6, 121.6, 79.2, 60.1, 52.5, 52.3, 44.6, 35.8, 22.3. LRMS (ESI):  $m/z$  (%) 349 (base peak)  $[\text{M} + \text{Na}]$ , 675 (10)  $[2\text{M} + \text{Na}]$ . HRMS (ESI):  $m/z$  calculated for  $\text{C}_{10}\text{H}_{18}\text{N}_2\text{O}_6\text{NaS}$  349.05040; found 349.04954  $[\text{M} + \text{Na}]^+$  (error  $-2.46$  ppm).

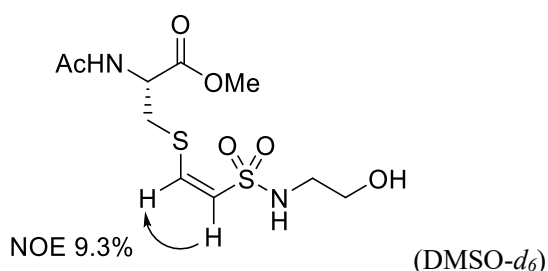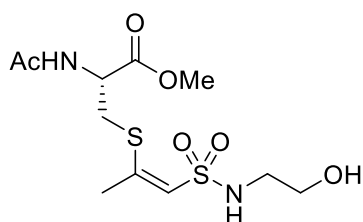

**Methyl (Z)-N-acetyl-S-(1-(N-(2-hydroxyethyl)sulfamoyl)prop-1-en-2-yl)-L-cysteinate (10-Cys):** Prepared as shown in general procedure 7; colorless crystals; preparative RP-HPLC eluent ( $\text{MeOH}/\text{H}_2\text{O} = 3:7$ , v/v); yield, 8% (isolated). FT-IR (KBr)  $\nu \text{ cm}^{-1}$ : 3360 (br), 3062 (w), 3955 (w), 2883 (w), 1741 (s), 1659 (s), 1558 (m), 1438 (m), 1375 (w), 1319 (s), 1282 (w), 1222 (w), 1142 (s), 1104 (w), 1058 (w), 1006 (w), 953 (w), 853 (w), 598 (m).  $^1\text{H-NMR}$  (400 MHz,  $\text{DMSO-}d_6$ )  $\delta$  8.50 (d,  $J = 7.8$  Hz, 1H), 7.00 (t,  $J = 6.0$  Hz, 1H), 6.26 (d,  $J = 1.3$  Hz, 1H), 4.70 (t,  $J = 5.6$  Hz, 1H), 4.43–4.38 (td,  $J = 8.6, 5.0$  Hz, 1H), 3.64 (s, 3H), 3.41 (dd,  $J = 12.0, 6.3$  Hz, 2H), 3.29 (dd,  $J = 13.6, 5.1$  Hz, 1H), 3.08 (dd,  $J = 13.6, 8.7$  Hz, 1H), 2.89 (q,  $J = 6.3$  Hz, 2H), 2.19 (d,  $J = 1.1$  Hz, 3H), 1.86 (s, 3H).  $^{13}\text{C-NMR}$  (101 MHz,  $\text{DMSO-}d_6$ )  $\delta$  170.7, 169.6, 148.8, 121.8, 60.1, 52.3, 52.1, 44.7, 30.9, 22.7, 22.3.

LRMS (ESI):  $m/z$  (%) 341 (10) [M + H], 363 (base peak) [M + Na], 703 (14) [2M + Na]. HRMS (ESI):  $m/z$  calculated for  $C_{11}H_{20}N_2O_6NaS_2$  363.06605; found 363.06578 [M + Na]<sup>+</sup> (error −0.74 ppm).

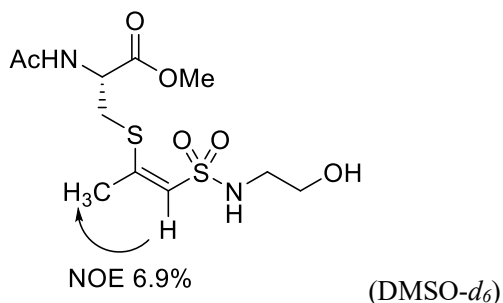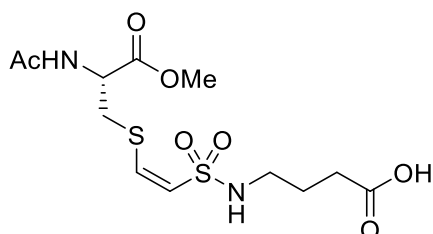

**(*R,Z*)-4-((2-((2-Acetamido-3-methoxy-3-oxopropyl)thio)vinyl)sulfonamido)butanoic acid (6-Cys):** Prepared as shown in general procedure 7; colorless gam; preparative RP-HPLC eluent (MeOH/H<sub>2</sub>O = 3:7, v/v); yield, 44% (isolated). FT-IR (ATR)  $\nu$  cm<sup>−1</sup>: 3534 (br), 3298 (br), 2960 (m), 1739 (s), 1661 (m), 1555 (s), 1436 (m), 1376 (m), 1319 (s), 1221 (m), 1142 (s), 705 (m). <sup>1</sup>H-NMR (400 MHz, DMSO-*d*<sub>6</sub>)  $\delta$  12.06 (br, 1H), 8.45 (d,  $J$  = 7.9 Hz, 1H), 7.22 (d,  $J$  = 10.3 Hz, 1H), 7.24–7.22 (m, 1H), 6.18 (d,  $J$  = 10.3 Hz, 1H), 4.46 (td,  $J$  = 8.5, 5.1 Hz, 1H), 3.63 (s, 3H), 3.19 (dd,  $J$  = 14.0, 5.1 Hz, 1H), 3.02 (dd,  $J$  = 14.0, 8.7 Hz, 1H), 2.83 (td,  $J$  = 6.9, 5.8 Hz, 2H), 2.24 (t,  $J$  = 7.4 Hz, 2H), 1.85 (s, 3H), 1.64 (quin,  $J$  = 7.1 Hz, 2H). <sup>13</sup>C-NMR (101 MHz, DMSO-*d*<sub>6</sub>)  $\delta$  174.1, 170.7, 169.5, 142.7, 121.4, 52.5, 52.2, 41.4, 35.8, 30.7, 24.7, 22.3. LRMS (ESI):  $m/z$  (%) 391 (base peak) [M + Na]. HRMS (ESI):  $m/z$  calculated for  $C_{12}H_{20}N_2O_7NaS_2$  391.06096; found 391.06069 [M + Na]<sup>+</sup> (error −0.68 ppm).

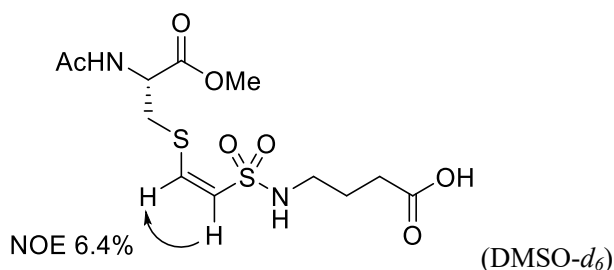

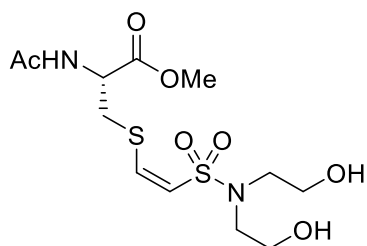

**Methyl (Z)-N-acetyl-S-(2-(N,N-bis(2-hydroxyethyl)sulfamoyl)vinyl)-L-cysteinate (7-Cys):**

Prepared as shown in general procedure 7; colorless gam; silica gel column eluent (CHCl<sub>3</sub>/MeOH = 19:1, v/v); yield, 77% (isolated). FT-IR (ATR)  $\nu$  cm<sup>-1</sup>: 3615 (br), 3050 (w), 2952 (w), 2885 (w), 2258 (w), 2129 (w), 1741 (m), 1658 (m), 1550 (m), 1437 (m), 1374 (w), 1321 (m), 1253 (w), 1219 (w), 1140 (s), 1074 (w), 1046 (m), 1024 (s), 992 (s), 915 (m), 826 (m). <sup>1</sup>H-NMR (400 MHz, DMSO-*d*<sub>6</sub>)  $\delta$  8.47 (d, *J* = 7.9 Hz, 1H), 7.29 (d, *J* = 10.3 Hz, 1H), 6.36 (d, *J* = 10.3 Hz, 1H), 4.82 (t, *J* = 5.4 Hz, 2H), 4.49 (td, *J* = 8.3, 5.1 Hz, 1H), 3.65 (s, 3H), 3.51 (td, *J* = 6.2, 5.7 Hz, 4H), (dd, *J* = 14.0, 5.1 Hz, 5H), 3.16 (t, *J* = 6.3 Hz, 4H), 3.04 (dd, *J* = 14.0, 8.8 Hz, 1H), 1.86 (s, 3H). <sup>13</sup>C-NMR (101 MHz, DMSO-*d*<sub>6</sub>)  $\delta$  170.8, 169.5, 143.5, 120.0, 59.7, 52.4, 52.2, 50.3, 35.7, 22.3. LRMS (EI): *m/z* (%) 371 (5) [M + H], 393 (base peak) [M + Na], 763 (15) [2M + Na]. HRMS (ESI): *m/z* calculated for C<sub>12</sub>H<sub>23</sub>N<sub>2</sub>O<sub>7</sub>S<sub>2</sub> 371.09467; found 371.09463 [M + H]<sup>+</sup> (error -0.09 ppm).

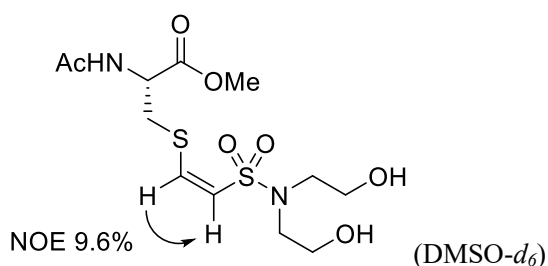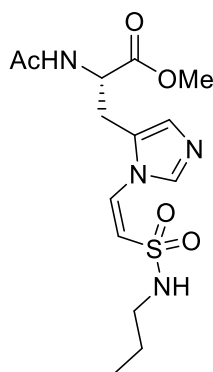

**Methyl (Z)-N<sup>α</sup>-acetyl-N<sup>π</sup>-(2-(N-propylsulfamoyl)vinyl)-L-histidinate (2b-His<sup>π</sup>):** Prepared as shown in general procedure 7; colorless oil; preparative RP-HPLC eluent (MeOH/H<sub>2</sub>O = 2:3, v/v); yield, 21% (isolated). FT-IR (KBr)  $\nu$  cm<sup>-1</sup>: 3367 (m), 3261 (br), 3061 (m), 2966 (m), 2877 (m), 1743 (s), 1661 (s), 1635 (s), 1540 (m), 1487 (m), 1439 (m), 1376 (m), 1324 (s), 1254 (m), 1221 (m), 1154 (m), 1103 (m),

1077 (m), 1010 (m).  $^1\text{H-NMR}$  (400 MHz,  $\text{CDCl}_3$ )  $\delta$  8.14 (s, 1H), 7.02 (d,  $J = 7.5$  Hz, 1H), 6.95 (d,  $J = 9.5$  Hz, 1H), 6.81 (d,  $J = 0.4$  Hz, 1H), 6.80 (br, 1H), 6.36 (d,  $J = 9.6$  Hz, 1H), 4.78 (dt,  $J = 7.5$ , 6.2 Hz, 1H), 3.76 (s, 3H), 3.22–3.12 (m, 2H), 3.04 (t,  $J = 6.2$  Hz, 2H), 1.99 (s, 3H), 1.55 (sext,  $J = 7.3$  Hz, 2H), 0.91 (t,  $J = 7.4$  Hz, 3H).  $^{13}\text{C-NMR}$  (101 MHz,  $\text{CDCl}_3$ )  $\delta$  171.2, 170.7, 139.5, 128.1, 126.9, 122.8, 52.8, 51.8, 44.8, 26.1, 23.2, 22.8, 11.1. LRMS (ESI):  $m/z$  (%) 257 (5)  $[\text{M} - \text{C}_2\text{H}_3\text{O}_2 - \text{C}_3\text{H}_7 + \text{H}]$ , 300 (10)  $[\text{M} - \text{C}_2\text{H}_3\text{O}_2 + \text{H}]$ , 317 (8)  $[\text{M} - \text{C}_3\text{H}_7 + 2\text{H}]$ , 359 (base peak)  $[\text{M} + \text{H}]$ , 381 (59)  $[\text{M} + \text{Na}]$ , 739 (4)  $[2\text{M} + \text{Na}]$ . HRMS (ESI):  $m/z$  calculated for  $\text{C}_{14}\text{H}_{22}\text{N}_4\text{O}_5\text{NaS}$  381.12086; found 381.12157  $[\text{M} + \text{Na}]^+$  (error 1.85 ppm).

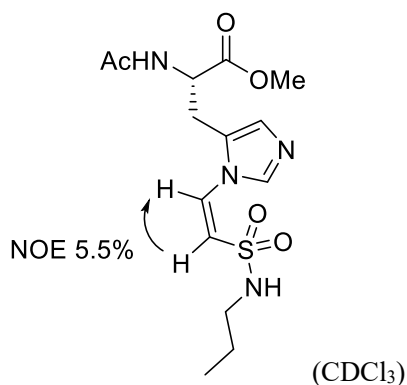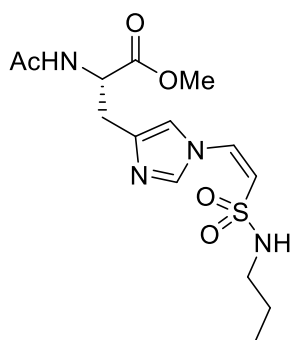

**Methyl (Z)- $N^\alpha$ -acetyl- $N^\tau$ -(2-(N-propylsulfamoyl)vinyl)-L-histidinate (2b- $\text{His}^\tau$ ):** Prepared as shown in general procedure 7; colorless oil; preparative RP-HPLC eluent ( $\text{MeOH}/\text{H}_2\text{O} = 2:3$ , v/v); yield, 45% (isolated). FT-IR (ATR)  $\nu$   $\text{cm}^{-1}$ : 3295 (br), 2968 (m), 2877 (m), 1741 (s), 1636 (s), 1539(m), 1498(s), 1437 (m), 1312 (s), 1243 (m), 1215 (m), 1155 (s), 1078 (m), 1026 (m).  $^1\text{H-NMR}$  (400 MHz,  $\text{CDCl}_3$ )  $\delta$  7.75 (d,  $J = 1.4$  Hz, 1H), 7.56 (d,  $J = 0.9$  Hz, 1H), 6.95 (d,  $J = 10.1$  Hz, 1H), 6.87 (d,  $J = 8.1$  Hz, 1H), 6.09 (d,  $J = 10.1$  Hz, 1H), 5.63 (t,  $J = 5.9$  Hz, 1H), 4.90 (ddd,  $J = 8.1$ , 6.1, 4.8 Hz, 1H), 3.75 (s, 3H), 3.13–2.99 (m, 4H), 2.02 (s, 3H), 1.54 (sext,  $J = 7.3$  Hz, 2H), 0.89 (t,  $J = 7.4$  Hz, 3H).  $^{13}\text{C-NMR}$  (101 MHz,  $\text{CDCl}_3$ )  $\delta$  172.2, 170.5, 139.2, 138.7, 128.4, 118.2, 117.9, 52.6, 51.9, 44.9, 30.2, 23.2, 23.1, 18.4, 11.1. LRMS (ESI):  $m/z$  (%) 257 (30)  $[\text{M} - \text{C}_2\text{H}_3\text{O}_2 - \text{C}_3\text{H}_7 + \text{H}]$ , 300 (13)  $[\text{M} - \text{C}_2\text{H}_3\text{O}_2 + \text{H}]$ , 317 (11)  $[\text{M} - \text{C}_3\text{H}_7 + 2\text{H}]$ , 359 (21)  $[\text{M} + \text{H}]$ , 381 (base peak)  $[\text{M} + \text{Na}]$ , 739 (4)  $[2\text{M} + \text{Na}]$ . HRMS (ESI):  $m/z$  calculated for  $\text{C}_{14}\text{H}_{23}\text{N}_4\text{O}_5\text{S}$  359.13891; found 359.13860  $[\text{M} + \text{H}]^+$  (error  $-0.89$  ppm).

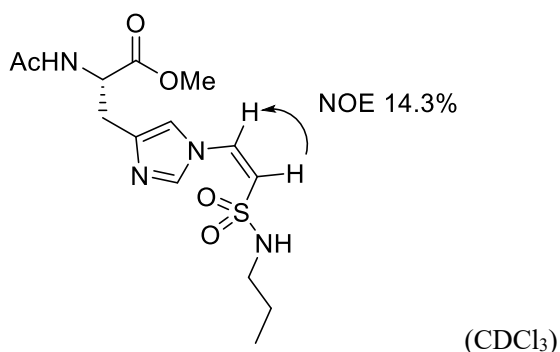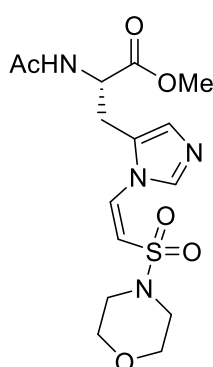

**Methyl (Z)-*N*<sup>α</sup>-acetyl-*N*<sup>π</sup>-(2-(morpholinosulfonyl)vinyl)-L-histidinate (2t-His<sup>π</sup>):** Prepared as shown in general procedure 7; colorless gam; preparative RP-HPLC eluent (MeOH/H<sub>2</sub>O = 2:3, v/v); yield, 45% (isolated). FT-IR (KBr)  $\nu$  cm<sup>-1</sup>: 3420 (br), 3144 (w), 3051 (w), 2925 (w), 3869 (w), 2600 (w), 1736 (m), 1675 (s), 1542 (m), 1438 (w), 1351 (m), 1303 (w), 1264 (m), 1203 (s), 1166 (s), 1137 (s), 1112 (m), 1076 (w), 956 (m), 835 (w), 800 (w), 739, (w), 722 (w). <sup>1</sup>H-NMR (400 MHz, DMSO-*d*<sub>6</sub>)  $\delta$  8.96 (s, 1H), 8.50 (d, *J* = 7.8 Hz, 1H), 7.61 (d, *J* = 9.0 Hz, 1H), 7.38 (s, 1H), 7.23 (d, *J* = 9.0 Hz, 1H), 4.56 (td, *J* = 8.3, 5.4 Hz, 1H), 3.67–3.64 (m, 4H), 3.64 (s, 3H), 3.16–3.11 (m, 5H), 3.01 (dd, *J* = 15.8, 8.9 Hz, 1H), 1.84 (s, 3H). <sup>13</sup>C-NMR (101 MHz, DMSO-*d*<sub>6</sub>)  $\delta$  171.0, 169.6, 137.3, 130.1, 125.4, 120.3, 65.5, 52.3, 50.6, 45.2, 25.1, 22.3. LRMS (ESI): *m/z* (%) 328 (6) [*M* – C<sub>2</sub>H<sub>3</sub>O<sub>2</sub> + H], 386 (base peak) [*M* + H], 409 (64) [*M* + Na]. HRMS (ESI): *m/z* calculated for C<sub>15</sub>H<sub>22</sub>N<sub>4</sub>O<sub>6</sub>NaS 409.11577; found 409.11376 [*M* + Na]<sup>+</sup> (error – 4.93 ppm).

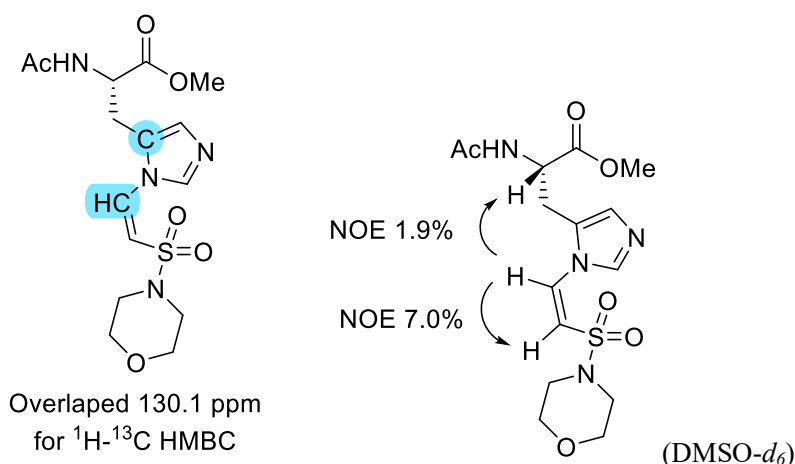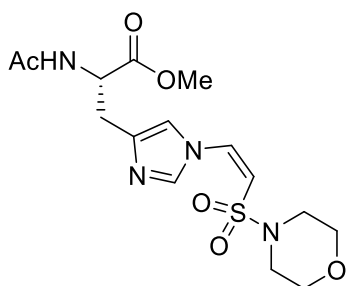

**Methyl (Z)- $N^\alpha$ -acetyl- $N^\epsilon$ -(2-(morpholinosulfonyl)vinyl)-L-histidinate (2t-His $^+$ ):** Prepared as shown in general procedure 7; colorless gam; preparative RP-HPLC eluent (MeOH/H<sub>2</sub>O = 5:95–20:80, v/v); yield, 45% (isolated). FT-IR (KBr)  $\nu$  cm $^{-1}$ : 3333 (m), 3175 (w), 3139 (m), 3060 (w), 2982 (w), 2931 (w), 2898 (w), 2931 (w), 2898 (w), 1741 (s), 1650 (s), 1540 (s), 1376 (w), 1352 (m), 1333 (m), 1317 (m), 1264 (m), 1237 (m), 1186 (s), 1149 (s), 1131 (s), 1114 (s), 1176 (s), 1176 (m), 957 (m).  $^1\text{H}$ -NMR (400 MHz, DMSO- $d_6$ )  $\delta$  8.63 (d,  $J$  = 3.5 Hz, 1H), 8.34 (d,  $J$  = 7.8 Hz, 1H), 7.67 (s, 1H), 7.60 (d,  $J$  = 10.0 Hz, 1H), 6.71 (dd,  $J$  = 10.0, 2.7 Hz, 1H), 4.55 (td,  $J$  = 8.3, 5.5 Hz, 1H), 3.68–3.65 (m, 4H), 3.63 (s, 3H), 3.14–3.12 (m, 4H), 3.03 (dd,  $J$  = 14.8, 5.5 Hz, 1H), 2.92 (dd,  $J$  = 15.0, 8.8 Hz, 1H), 1.82 (s, 3H).  $^{13}\text{C}$ -NMR (101 MHz, DMSO- $d_6$ )  $\delta$  171.6, 169.5, 138.8, 134.9, 131.4, 118.5, 115.4, 65.4, 52.0, 51.4, 45.2, 28.1, 22.3. LRMS (ESI):  $m/z$  (%) 387 (13) [M + H], 409 (base peak) [M + Na], 795 (10) [2M + Na]. HRMS (ESI):  $m/z$  calculated for C<sub>15</sub>H<sub>22</sub>N<sub>4</sub>O<sub>6</sub>NaS 409.11577; found 409.11393 [M + Na] $^+$  (error – 4.51 ppm).

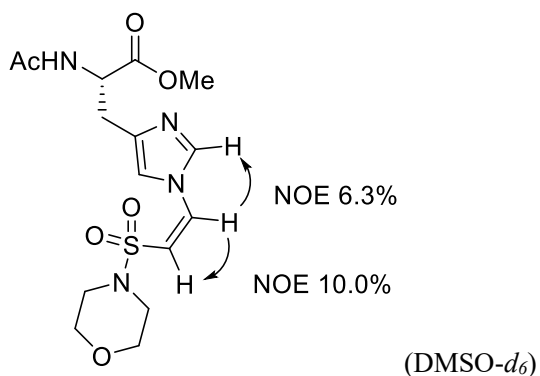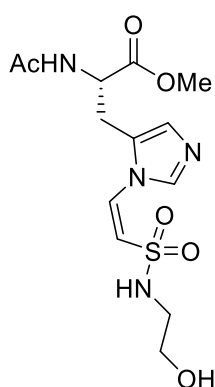

**Methyl (Z)-*N*<sup>α</sup>-acetyl-*N*<sup>π</sup>-(2-(*N*-(2-hydroxyethyl)sulfamoyl)vinyl)-L-histidinate (5-His<sup>T</sup>):** Prepared as shown in general procedure 7; colorless gam; preparative RP-HPLC eluent (MeOH/H<sub>2</sub>O = 5:95–15:85, v/v); yield, 13% (isolated). FT-IR (KBr)  $\nu$  cm<sup>-1</sup>: 3322 (s), 3196 (w), 3056 (w), 2959 (w), 2929 (w), 1753 (s), 1739 (s), 1655 (s), 1536 (s), 1435 (m), 1409 (w), 1371 (m), 1304 (m), 1269 (m), 1252 (m), 1233 (m), 1215 (m), 1165 (m), 1130 (w), 1044 (w), 1006 (m). <sup>1</sup>H-NMR (400 MHz, DMSO-*d*<sub>6</sub>)  $\delta$  8.91 (s, 1H), 8.48 (d, *J* = 7.8 Hz, 1H), 7.87 (t, *J* = 5.7 Hz, 1H), 7.37–7.31 (m, 2H), 7.08 (d, *J* = 9.0 Hz, 1H), 4.55 (td, *J* = 8.3, 5.3 Hz, 1H), 3.62 (s, 3H), 3.44 (t, *J* = 5.9 Hz, 2H), 3.11 (dd, *J* = 15.8, 5.1 Hz, 1H), 3.04–2.96 (m, 3H), 1.82 (s, 3H). <sup>13</sup>C-NMR (101 MHz, DMSO-*d*<sub>6</sub>)  $\delta$  171.1, 169.7, 137.3, 129.9, 129.8, 126.3, 120.1, 60.2, 52.3, 50.6, 45.0, 25.1, 22.3. LRMS (ESI): *m/z* (%) 361 (20) [M + H], 383 (base peak) [M + Na], 743 (13) [2M + Na]. HRMS (ESI): *m/z* calculated for C<sub>13</sub>H<sub>20</sub>N<sub>4</sub>O<sub>6</sub>NaS 383.10012; found 383.09829 [M + Na]<sup>+</sup> (error –4.80 ppm).

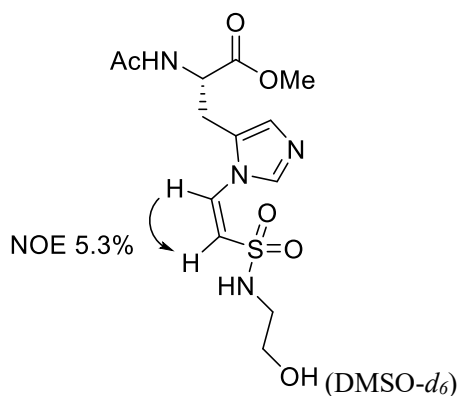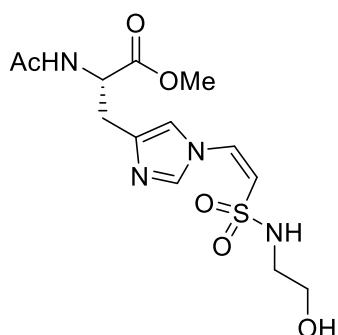

**Methyl (Z)- $N^{\alpha}$ -acetyl- $N^{\epsilon}$ -(2-( $N$ -(2-hydroxyethyl)sulfamoyl)vinyl)-L-histidinate (5-His $^{\epsilon}$ ):** Prepared as shown in general procedure 7; colorless oil; preparative RP-HPLC eluent (MeOH/H<sub>2</sub>O = 5:95–15:85, v/v); yield, 13% (isolated). FT-IR (KBr)  $\nu$  cm<sup>-1</sup>: 3398 (br), 2960 (w), 2877 (w), 1740 (m), 1675 (s), 1544 (m), 1502 (w), 1438 (m), 1377 (w), 1331 (m), 1203 (m), 1158 (m), 1052 (w), 1026 (w), 1002 (w), 832 (w), 801 (w), 764 (w), 721 (w), 687 (w), 623 (w). <sup>1</sup>H-NMR (400 MHz, DMSO- $d_6$ )  $\delta$  8.55 (s, 1H), 8.33 (d,  $J$  = 7.7 Hz, 1H), 7.79 (t,  $J$  = 5.8 Hz, 1H), 7.64 (s, 1H), 7.38 (d,  $J$  = 10.0 Hz, 1H), 6.58 (d,  $J$  = 9.9 Hz, 1H), 4.57–4.51 (m, 1H), 3.62 (s, 3H), 3.46 (t,  $J$  = 6.0 Hz, 2H), 3.04–2.98 (m, 3H), 2.91 (dd,  $J$  = 14.8, 8.7 Hz, 1H), 1.83 (s, 3H). <sup>13</sup>C-NMR (101 MHz, DMSO- $d_6$ )  $\delta$  171.7, 169.5, 138.6, 134.9, 128.1, 120.4, 118.7, 60.0, 52.0, 51.5, 45.0, 28.2, 22.3. LRMS (ESI):  $m/z$  (%) 361 (20) [M + H], 383 (base peak) [M + Na], 743 (13) [2M + Na]. HRMS (ESI):  $m/z$  calculated for C<sub>13</sub>H<sub>20</sub>N<sub>4</sub>O<sub>6</sub>NaS 383.10012; found 383.09927 [M + Na]<sup>+</sup> (error - 2.23 ppm).

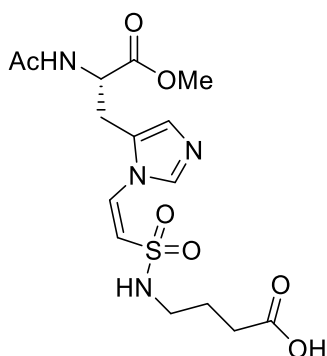

**(*S,Z*)-4-((2-(5-(2-Acetamido-3-methoxy-3-oxopropyl)-1*H*-imidazol-1-**

**yl)vinyl)sulfonamido)butanoic acid (6-*His*<sup>π</sup>):** Prepared as shown in general procedure 7; colorless oil; preparative RP-HPLC eluent (MeCN:H<sub>2</sub>O:TFA = 1:9:0.01, v/v); yield, 9% (isolated). FT-IR (ATR)  $\nu$  cm<sup>-1</sup>: 3131 (br), 1727 (m), 1668 (s), 1544 (w), 1435 (w), 1333 (m), 1188 (s), 1149 (s), 1016 (s), 996 (s), 825 (m), 767 (m), 714 (m). <sup>1</sup>H-NMR (400 MHz, DMSO-*d*<sub>6</sub>)  $\delta$  9.07 (s, 1H), 8.49 (d, *J* = 7.9 Hz, 1H), 7.91 (t, *J* = 5.7 Hz, 1H), 7.46 (s, 1H), 7.43 (d, *J* = 8.9 Hz, 1H), 7.17 (d, *J* = 8.9 Hz, 1H), 4.58 (td, *J* = 8.4, 5.2 Hz, 1H), 3.65 (s, 3H), 3.13 (dd, *J* = 15.8, 5.3 Hz, 1H), 3.04–2.95 (m, 3H), 2.27 (t, *J* = 7.3 Hz, 2H), 1.84 (s, 3H), 1.68 (quin, *J* = 7.2 Hz, 2H). <sup>13</sup>C-NMR (101 MHz, DMSO-*d*<sub>6</sub>)  $\delta$  174.0, 171.0, 169.7, 137.1, 131.1, 130.3, 126.7, 118.9, 52.3, 50.5, 41.7, 30.5, 25.1, 24.9, 22.3. LRMS (ESI): *m/z* (%) 403 (68) [M + H], 425 (base peak) [M + Na]. HRMS (ESI): *m/z* calculated for C<sub>15</sub>H<sub>22</sub>N<sub>4</sub>O<sub>7</sub>NaS 425.11069; found 425.10857 [M + Na]<sup>+</sup> (error -4.98 ppm).

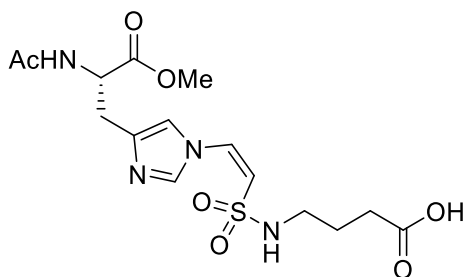

**(*S,Z*)-4-((2-(4-(2-Acetamido-3-methoxy-3-oxopropyl)-1*H*-imidazol-1-**

**yl)vinyl)sulfonamido)butanoic acid (6-*His*<sup>τ</sup>):** Prepared as shown in general procedure 7; colorless oil; preparative RP-HPLC eluent (MeCN:H<sub>2</sub>O:TFA = 1:9:0.01, v/v); yield, 10% (isolated). FT-IR (KBr)  $\nu$  cm<sup>-1</sup>: 3415 (br), 3273 (br), 3141 (w), 2874 (w), 2628 (w), 1734 (m), 1673 (s), 1544 (w), 1437 (w), 1376 (w), 1334 (m), 1202 (s), 1158 (s), 1084 (w), 1026 (w), 999 (w), 833 (m), 801 (m), 765 (m), 721 (m), 686 (m), 624 (m), 570 (m). <sup>1</sup>H-NMR (400 MHz, DMSO-*d*<sub>6</sub>)  $\delta$  8.74 (s, 1H), 8.35 (d, *J* = 7.7 Hz, 1H), 7.83 (t, *J* = 5.7 Hz, 1H), 7.66 (s, 1H), 7.42 (d, *J* = 9.9 Hz, 1H), 6.65 (d, *J* = 9.8 Hz, 1H), 4.56 (td, *J* = 8.2, 5.7 Hz, 1H), 3.63 (s, 3H), 3.05 (dd, *J* = 14.9, 5.5 Hz, 1H), 3.00–2.89 (m, 3H), 2.26 (t, *J* = 7.3 Hz, 2H), 1.83 (s, 3H), 1.68 (quin, *J* = 7.1 Hz, 2H). <sup>13</sup>C-NMR (101 MHz, DMSO-*d*<sub>6</sub>)  $\delta$  174.0, 171.5, 169.5, 138.3, 133.7, 128.3, 121.9, 119.1, 52.1, 51.4, 41.7, 30.6, 27.7, 24.8, 22.3. LRMS (ESI): *m/z* (%)

403 (16) [M + H], 425 (base peak) [M + Na], 827 (8) [2M + Na]. HRMS (ESI):  $m/z$  calculated for  $C_{15}H_{22}N_4O_7NaS$  425.11069; found 425.10910 [M + Na]<sup>+</sup> (error -3.74 ppm).

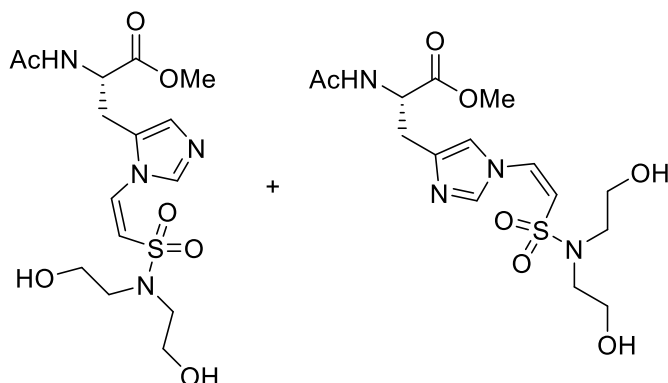

**Methyl (Z)-N<sup>α</sup>-acetyl-N<sup>πτ</sup>-(2-(N,N-bis(2-hydroxyethyl)sulfamoyl)vinyl)-L-histidinate (7-His<sup>π,τ</sup>):**

Prepared as shown in general procedure 7; colorless oil; preparative RP-HPLC eluent (MeCN/H<sub>2</sub>O/TFA = 12.5:87.5:0.01, v/v); yield, 40% ( $\pi$ : $\tau$  = 1:4). FT-IR (KBr)  $\nu$  cm<sup>-1</sup>: 3388 (br), 3060 (w), 2958 (w), 2882 (w), 1740 (m), 1675 (s), 1544 (m), 1503 (w), 1438 (w), 1375 (w), 1336 (m), 1203 (s), 1157 (s), 1074 (w), 1047 (w), 1001 (w), 924 (w), 836 (w), 801 (w), 761 (w), 723 (m). <sup>1</sup>H-NMR (400 MHz, DMSO-*d*<sub>6</sub>,  $\pi$ -form)  $\delta$  8.53 (s, 1H), 8.25 (d,  $J$  = 7.8 Hz, 1H), 7.61 (s, 1H), 7.48 (d,  $J$  = 10.0 Hz, 1H), 6.70 (d,  $J$  = 10.0 Hz, 1H), 4.58–4.52 (m, 1H), 3.62 (s, 3H), 3.57 (t,  $J$  = 6.3 Hz, 2H), 3.32 (t,  $J$  = 6.0 Hz, 2H), 3.01–2.88 (m, 2H), 1.82 (s, 3H). <sup>1</sup>H-NMR (400 MHz, DMSO-*d*<sub>6</sub>,  $\tau$ -form)  $\delta$  8.61 (s, 1H), 8.34 (d,  $J$  = 7.8 Hz, 1H), 7.63 (s, 1H), 7.45 (d,  $J$  = 10.0 Hz, 1H), 6.75 (d,  $J$  = 10.0 Hz, 1H), 4.58–4.52 (m, 1H), 3.62 (s, 3H), 3.55 (t,  $J$  = 6.3 Hz, 2H), 3.28 (t,  $J$  = 6.0 Hz, 2H), 3.02 (dd,  $J$  = 14.9, 5.8 Hz, 1H), 2.93 (dd,  $J$  = 14.6, 8.7 Hz, 1H), 1.82 (s, 1H). <sup>13</sup>C-NMR (101 MHz, DMSO-*d*<sub>6</sub>,  $\pi$ -form)  $\delta$  171.6, 169.5, 138.4, 134.1, 128.8, 120.4, 118.8, 59.3, 52.1, 51.4, 50.2, 40.1, 39.9, 39.7, 39.5, 39.3, 39.1, 38.9, 27.9, 22.3. <sup>13</sup>C-NMR (101 MHz, DMSO-*d*<sub>6</sub>,  $\tau$ -form)  $\delta$  171.6, 169.5, 138.4, 134.1, 128.8, 120.4, 118.8, 59.3, 52.1, 51.4, 50.2, 40.1, 39.9, 39.7, 39.5, 39.3, 39.1, 38.9, 27.9, 22.3. LRMS (ESI):  $m/z$  (%) 405 (11) [M + H], 427 (base peak) [M + Na], 831 (6) [2M + Na]. HRMS (ESI):  $m/z$  calculated for  $C_{15}H_{24}N_4O_7NaS$  427.12634; found 427.12623 [M + Na]<sup>+</sup> (error -0.26 ppm).

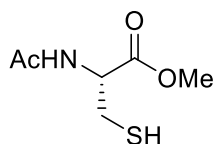

**Methyl acetyl-L-cysteinate (Ac-Cys-OMe) (Cys):** *N*-Acetyl-L-cysteine (10.0 mmol, 1.63 g) was dissolved distilled methanol (20 mL) in sealed tube. Acetyl chloride (0.2 mL) was added, and reaction was stirred 3 hours at 55°C. After evaporation of the solvent, and was added saturated NaHCO<sub>3</sub>

aqueous solution (75 mL). The aqueous layer was extracted three times with EtOAc (150 mL), and dried over Na<sub>2</sub>SO<sub>4</sub>. After concentration, chromatography was performed on the residue on a silica gel column (Hexane:EtOAc = 1:1) to give light white solids **Cys** (1.18 g, yield 66%). FT-IR (NaCl)  $\nu$  cm<sup>-1</sup>: 3285 (br), 3060 (w), 2954 (w), 2849 (w), 2563 (w), 1742 (s), 1656 (s), 1541 (s), 1438 (m), 1374 (m), 1345 (m), 1312 (m), 1218 (s), 1179 (m), 1134 (m), 1039 (w), 714 (w). <sup>1</sup>H-NMR (400 MHz, CDCl<sub>3</sub>)  $\delta$  6.43 (d,  $J$  = 3.0 Hz, 1H), 4.90 (dt,  $J$  = 7.4, 4.1 Hz, 1H), 3.80 (s, 3H), 3.02 (ddd,  $J$  = 9.0, 7.4, 3.0 Hz, 2H), 2.08 (s, 3H), 1.35 (t,  $J$  = 9.0 Hz, 1H). <sup>13</sup>C-NMR (101 MHz, CDCl<sub>3</sub>)  $\delta$  170.6, 169.9, 53.5, 52.9, 26.9, 23.2. LRMS (EI):  $m/z$  (%) 60 [M – C<sub>4</sub>H<sub>8</sub>NOS + H] (base peak), 118 [M – C<sub>2</sub>H<sub>3</sub>O<sub>2</sub>] (25), 177 [M] (6). HRMS (EI):  $m/z$  calculated for C<sub>6</sub>H<sub>11</sub>NO<sub>3</sub>S 177.04596; found 177.0459 [M]<sup>+</sup> (error +0.34 ppm).

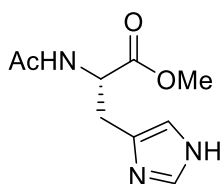

**Methyl acetyl-L-histidinate (Ac-His-OMe) (His):** A suspension of *N*-acetyl-L-histidine monohydrate (2.15 g, 10.0 mmol) in dry MeOH (20 mL) was treated with thionyl chloride (2.18 mL, 3.0 equiv.) at 0 °C under an N<sub>2</sub> atmosphere. The reaction mixture was stirred at room temperature for 15 hours. After evaporation of the solvent, the residue was taken up in 4% NH<sub>3</sub> in MeOH (20 mL). After evaporating the solvent, acetone was added, and the mixture was filtered. After evaporating the solvent from the filtrate, the oily residue was purified via column chromatography on silica gel (CHCl<sub>3</sub>/MeOH/NH<sub>3</sub> = 9:1:0.04) to give off-white solid **His** (1.88 g, 89%). FT-IR (KBr)  $\nu$  cm<sup>-1</sup>: 3338 (m), 3229 (m), 3192 (m), 3033 (m), 2960 (m), 2940 (m), 2863 (w), 1728 (s), 1658 (s), 1557 (s), 1493 (m), 1441 (m), 1376 (m), 1314 (m), 1267 (m), 1246 (s), 1143 (m), 1086 (w), 1064 (w), 1002 (m), 978 (m), 930 (w), 875 (w), 841 (w), 822 (w), 796 (w), 779 (w), 732 (w), 673 (w), 612 (m). <sup>1</sup>H-NMR (400 MHz, DMSO-*d*<sub>6</sub>)  $\delta$  11.82 (br, 1H), 8.23 (d,  $J$  = 6.0 Hz, 1H), 7.51 (s, 1H), 6.81 (br, 1H), 4.44 (dt,  $J$  = 7.9, 5.3 Hz, 1H), 3.57 (s, 3H), 2.83 (dd,  $J$  = 14.2, 5.3 Hz, 1H), 2.76 (dd,  $J$  = 14.2, 8.1 Hz, 1H), 1.80 (s, 3H). <sup>13</sup>C-NMR (101 MHz, DMSO-*d*<sub>6</sub>)  $\delta$  172.3, 169.3, 136.0, 134.9, 113.2, 52.5, 51.7, 29.8, 22.3. HRMS (ESI):  $m/z$  calculated for C<sub>9</sub>H<sub>13</sub>N<sub>3</sub>O<sub>3</sub>Na 234.08546; found 234.08561 [M + Na]<sup>+</sup> (error +0.64 ppm).

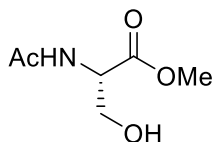

**Methyl acetyl-L-serinate (Ac-Ser-OMe) (Ser):** L-Serine methyl ester hydrochloride (1.556 g, 10.0 mmol) was dissolved in anhydrous DCM (50 mL). Et<sub>3</sub>N (3.48 mL, 2.5 equiv.) was added at 0 °C for 30 minutes. Acetyl chloride (785  $\mu$ L, 1.1 equiv.) was added at 0 °C, and the mixture was stirred at 0 °C

under an N<sub>2</sub> atmosphere for 2 h and filter the precipitated Et<sub>3</sub>N·HCl. Remove the solvent under reduce pressure and purify the residue by column chromatography on silica gel (EtOAc) to give colorless gam **Ser** (1.28 g, 79%). FT-IR (NaCl)  $\nu$  cm<sup>-1</sup>: 3311 (br), 3086 (m), 2956 (m), 2888 (w), 2249 (w), 1741 (s), 1655 (s), 1542 (s), 1438 (s), 1377 (s), 1348 (m), 1288 (m), 1226 (s), 1148 (m), 1080 (m), 982 (w), 917 (w), 856 (w), 732 (m). <sup>1</sup>H-NMR (400 MHz, CDCl<sub>3</sub>)  $\delta$  6.58 (d,  $J$  = 5.4 Hz, 1H), 4.68 (dt,  $J$  = 7.4, 3.6 Hz, 1H), 3.99 (ddd,  $J$  = 11.2, 5.6, 4.0, 1H), 3.92 (ddd,  $J$  = 11.2, 5.6, 3.4 Hz, 1H), 3.80 (s, 3H), 2.91 (t,  $J$  = 5.9 Hz, 1H), 2.08 (s, 3H). <sup>13</sup>C-NMR (101 MHz, CDCl<sub>3</sub>)  $\delta$  171.1, 170.8, 63.3, 54.7, 52.8, 23.1. LRMS (ESI):  $m/z$  (%) 184 (95) [M + Na], 345 (19) [2M + Na]. HRMS (ESI):  $m/z$  calculated for C<sub>6</sub>H<sub>11</sub>NO<sub>4</sub>Na 184.05858; found 184.05832 [M + Na]<sup>+</sup> (error -1.37 ppm).

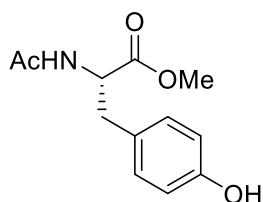

**Methyl acetyl-L-tyrosinate (Ac-Tyr-OMe) (Tyr):** *N*-Acetyl-L-tyrosine (1.12 g, 5.00 mmol) was dry MeOH (10 mL) in sealed tube. Acetyl chloride (33  $\mu$ L) was added, and reaction was stirred 2 hours at 55°C. Remove the solvent under reduce pressure and purify the residue by column chromatography on silica gel (Hexane:EtOAc = 1:3) to give off-white solids **Tyr** (1.14 g, yield 96%). FT-IR (KBr)  $\nu$  cm<sup>-1</sup>: 3549 (m), 3351 (m), 3323 (s), 3273 (m), 3157 (br), 2957 (m), 2822 (m), 2749 (w), 2963 (w), 2615 (w), 2504 (w), 1731 (s), 1661 (s), 1615 (m), 1595 (m), 1547 (s), 1517 (s), 1450 (m), 1301 (m), 1378 (m), 1282 (m), 1240 (s), 1182 (m), 1173 (m), 1134 (m), 1110 (w), 1149 (m), 1013 (m). <sup>1</sup>H-NMR (400 MHz, CDCl<sub>3</sub>)  $\delta$  6.99 (s, 1H), 6.95–6.92 (m, 2H), 6.75–6.72 (m, 2H), 6.10 (d,  $J$  = 8.1 Hz, 1H), 4.87 (td,  $J$  = 7.0, 5.2 Hz, 1H), 3.74 (s, 3H), 3.08 (dd,  $J$  = 14.0, 5.6 Hz, 1H), 2.97 (dd,  $J$  = 14.1, 6.3 Hz, 1H), 1.99 (s, 3H). <sup>13</sup>C-NMR (101 MHz, CDCl<sub>3</sub>)  $\delta$  172.3, 170.0, 155.2, 130.3, 127.4, 115.5, 53.3, 52.4, 37.2, 23.1. LRMS (EI):  $m/z$  (%) 107 (62) [M – C<sub>5</sub>H<sub>8</sub>NO<sub>3</sub>], 178 (base peak) [M – C<sub>2</sub>H<sub>3</sub>O<sub>2</sub>], 237 (6) [M]. HRMS (EI):  $m/z$  calculated for C<sub>12</sub>H<sub>15</sub>NO<sub>4</sub> 237.10011; found 237.1012 [M]<sup>+</sup> (error +4.8 ppm).

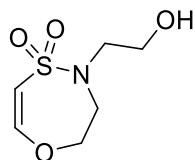

**5-(2-Hydroxyethyl)-6,7-dihydro-5H-1,4,5-oxathiazepine 4,4-dioxide (S1):** Prepared as shown in general procedure 7; colorless oil; silica gel column eluent (CHCl<sub>3</sub>/MeOH = 9:1, v/v); yield, 5%. FT-IR (ATR)  $\nu$  cm<sup>-1</sup>: 3513 (br), 3069 (w), 2945 (w), 1605 (m), 1450 (w), 1317 (s), 1284 (m), 1255 (m), 1137 (s), 1082 (s), 963 (w), 913 (w), 823 (m), 708 (s). <sup>1</sup>H-NMR (400 MHz, CDCl<sub>3</sub>)  $\delta$  6.69 (d,  $J$  = 6.9

Hz, 1H), 5.74 (d,  $J = 6.9$  Hz, 1H), 4.65–4.62 (m, 2H), 3.80 (q,  $J = 5.0$  Hz, 2H), 3.66–3.63 (m, 2H), 3.42 (t,  $J = 5.3$  Hz, 2H), 2.17 (t,  $J = 5.0$  Hz, 1H).  $^{13}\text{C}$ -NMR (101 MHz,  $\text{CDCl}_3$ )  $\delta$  153.2, 110.1, 72.5, 61.5, 53.8, 51.0. LRMS (ESI):  $m/z$  (%) 194 (58)  $[\text{M} + \text{H}]$ , 216 (34)  $[\text{M} + \text{Na}]$ . HRMS (ESI):  $m/z$  calculated for  $\text{C}_6\text{H}_{12}\text{NO}_4\text{S}$  194.04870; found 194.04876  $[\text{M} + \text{H}]^+$  (error +0.29 ppm).

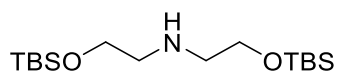

**Bis(2-((*tert*-butyldimethylsilyl)oxy)ethyl)amine (S2):** Diethanolamine (2.63 g, 25 mmol),  $\text{Et}_3\text{N}$  (8.7 mL, 2.5 equiv.), and *t*-butyldimethylsilyl (TBS) chloride (8.65 g, 2.3 equiv.) were added to DCM (100 mL) at 0 °C under  $\text{N}_2$  and stirred for 6 hours. The reaction mixture was washed three times with saturated  $\text{NaHCO}_3$ , and the organic layer was dried over  $\text{Na}_2\text{SO}_4$ . After concentration, chromatography was performed on the residue on a silica gel column (Hexane:EtOAc = 2:1, v/v) to give colorless oil **S2** (7.55 g, 90%). FT-IR (NaCl)  $\nu$   $\text{cm}^{-1}$ : 2954 (m), 2929 (m), 1885 (m), 1859 (m), 1471 (m), 1463 (m), 1254 (m), 1100 (s), 832 (s), 774 (s).  $^1\text{H}$ -NMR (400 MHz,  $\text{CDCl}_3$ )  $\delta$  3.73 (t,  $J = 5.3$  Hz, 4H), 2.73 (t,  $J = 5.3$  Hz, 4H), 1.69 (br, 1H), 0.90 (s, 18H), 0.06 (s, 12H).  $^{13}\text{C}$ -NMR (101 MHz,  $\text{CDCl}_3$ )  $\delta$  62.6, 51.8, 26.0, 18.3, −5.3. LRMS (EI):  $m/z$  (%) 334 (base peak)  $[\text{M} + \text{H}]$ , 356 (23)  $[\text{M} + \text{Na}]$ . HRMS (ESI):  $m/z$  calculated for  $\text{C}_{18}\text{H}_{40}\text{NO}_2\text{Si}_2$  334.25976; found 334.26090  $[\text{M} + \text{H}]^+$  (error +3.41 ppm).

NMR spectra

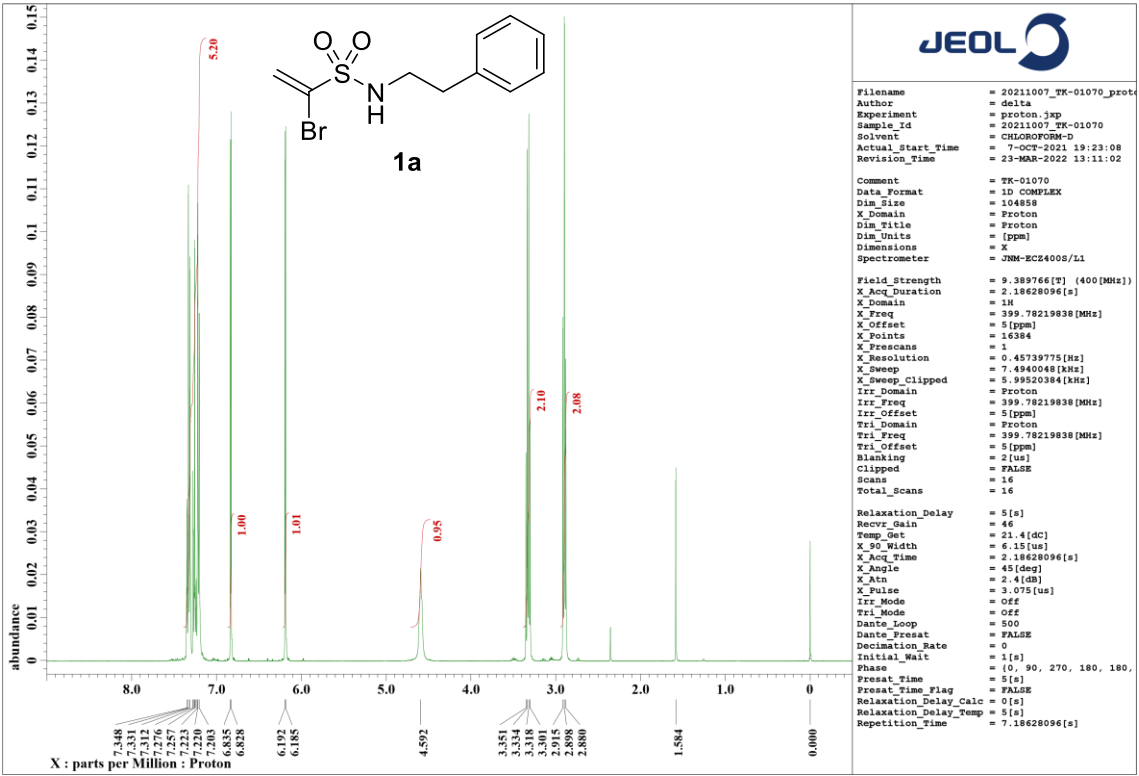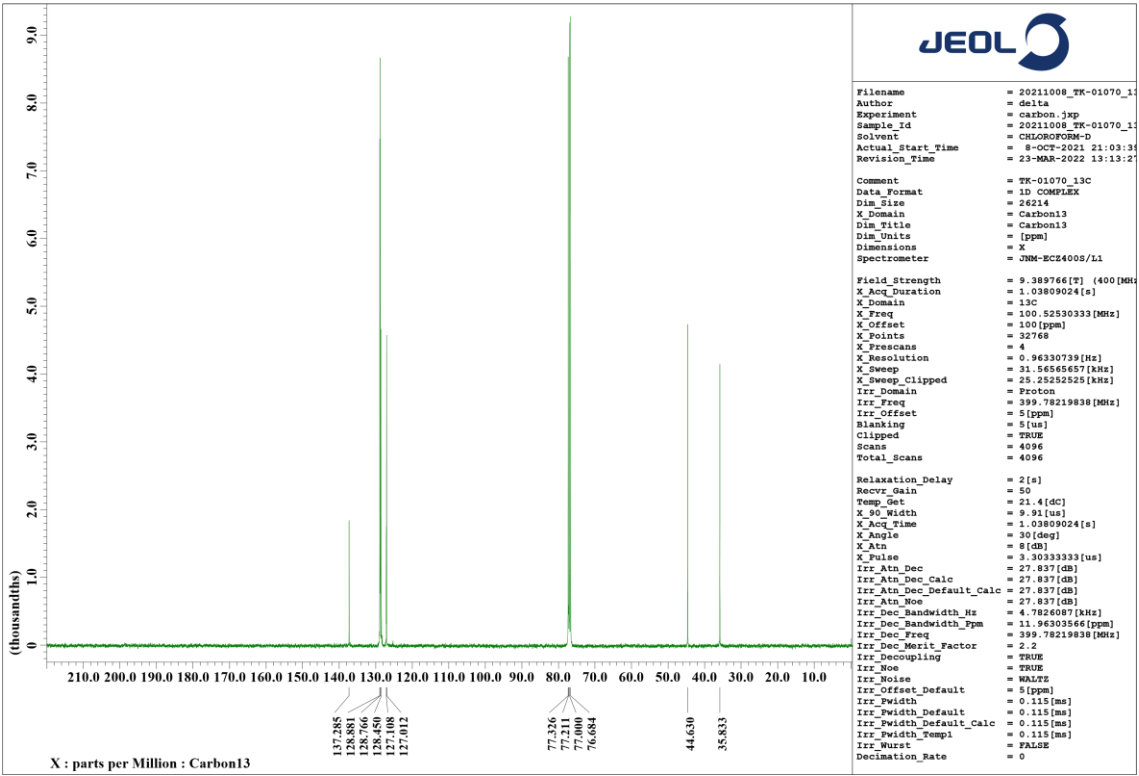

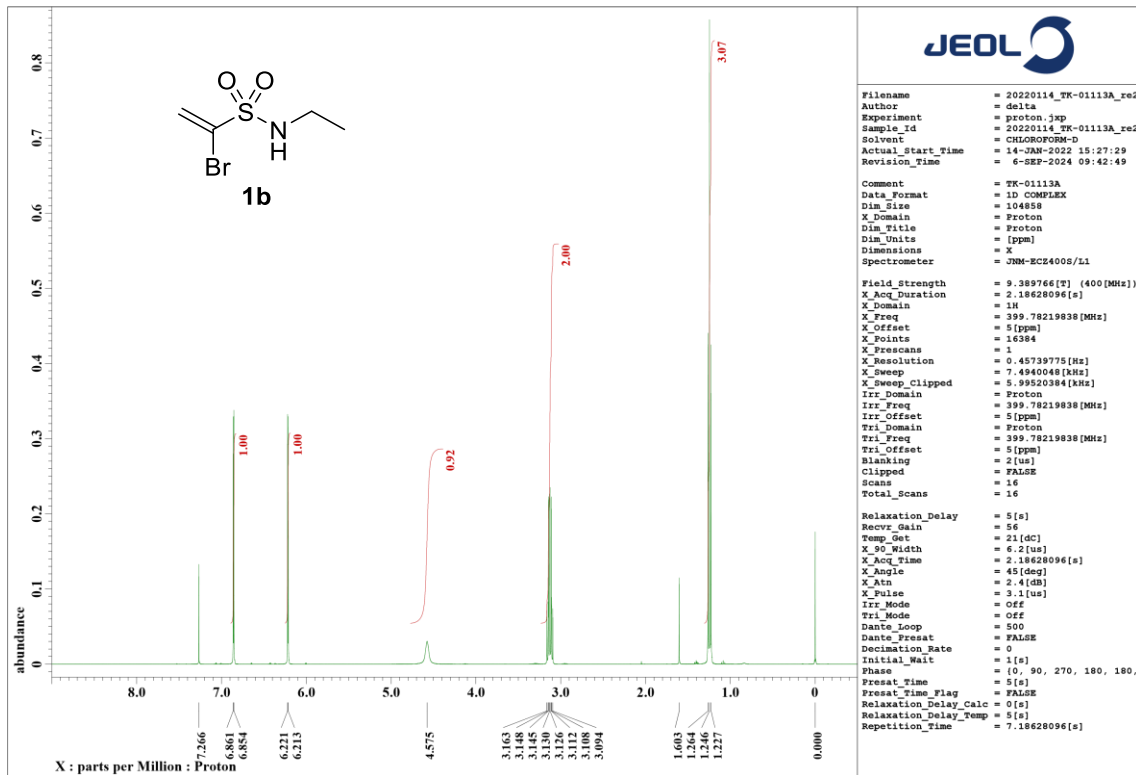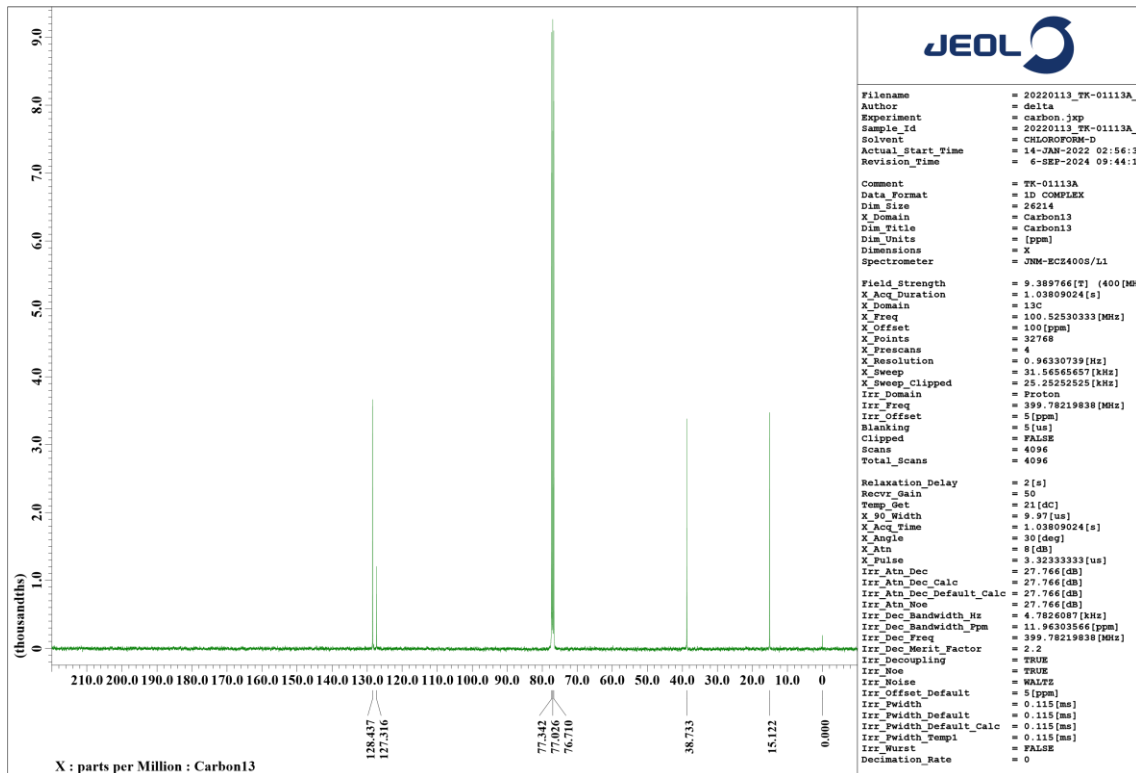

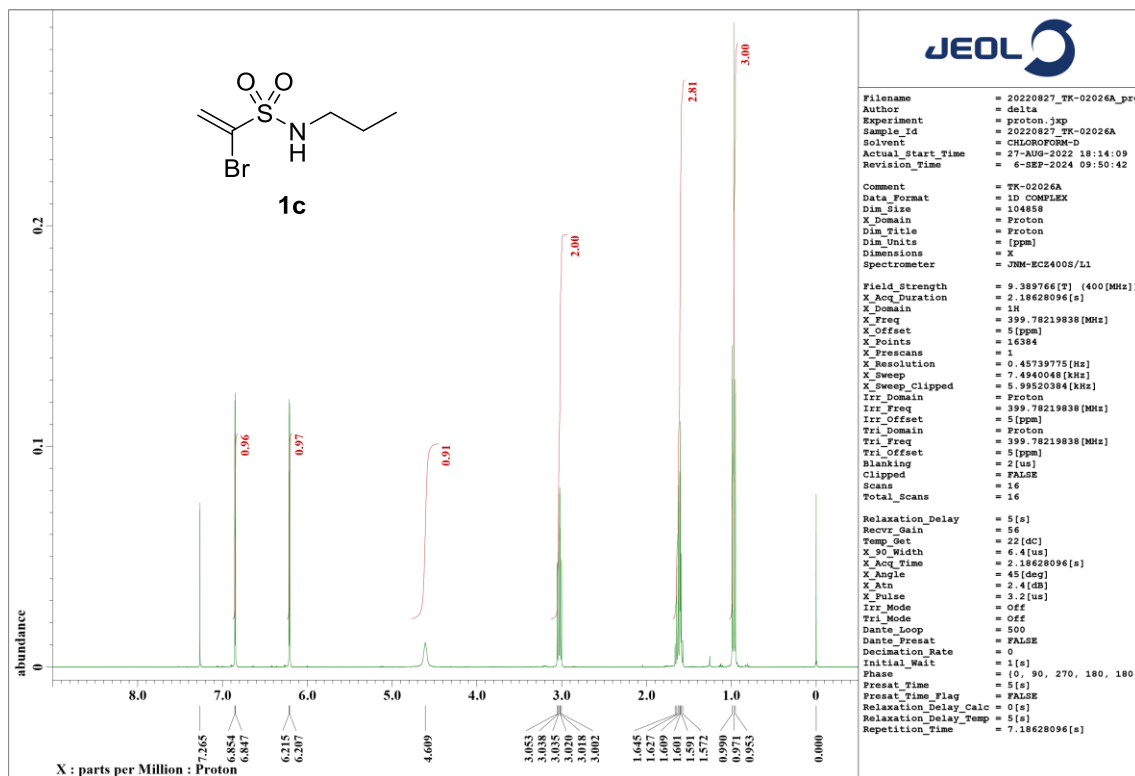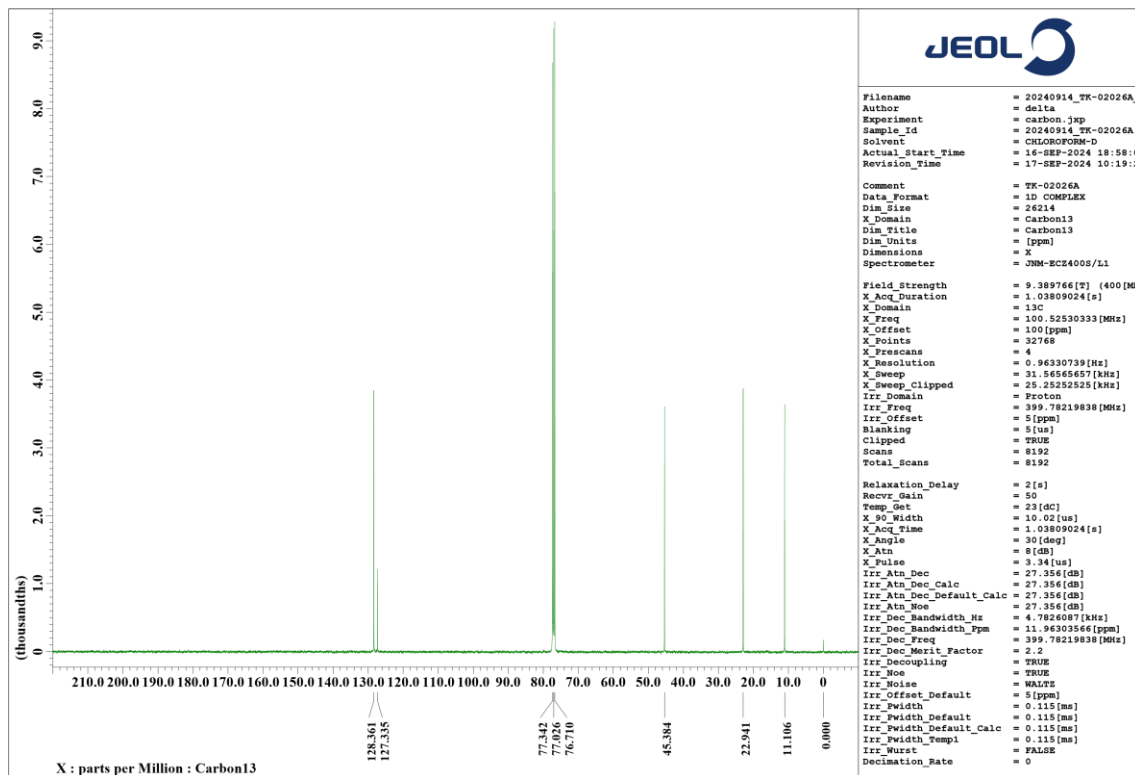

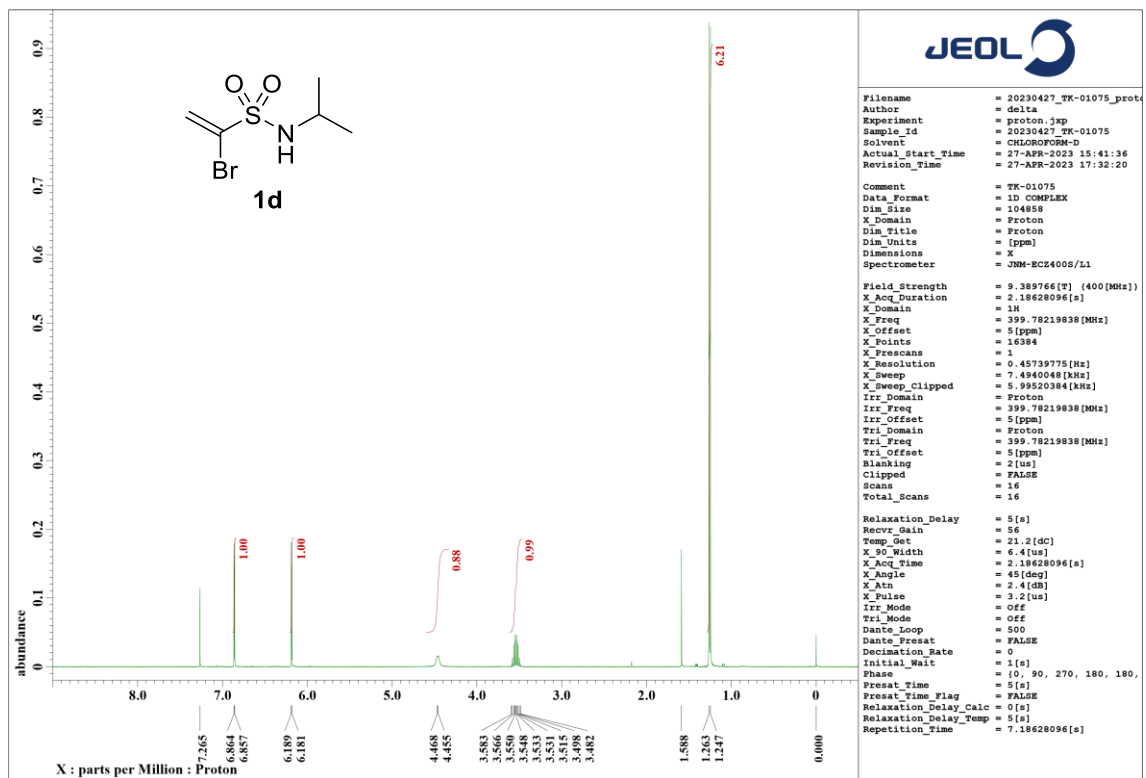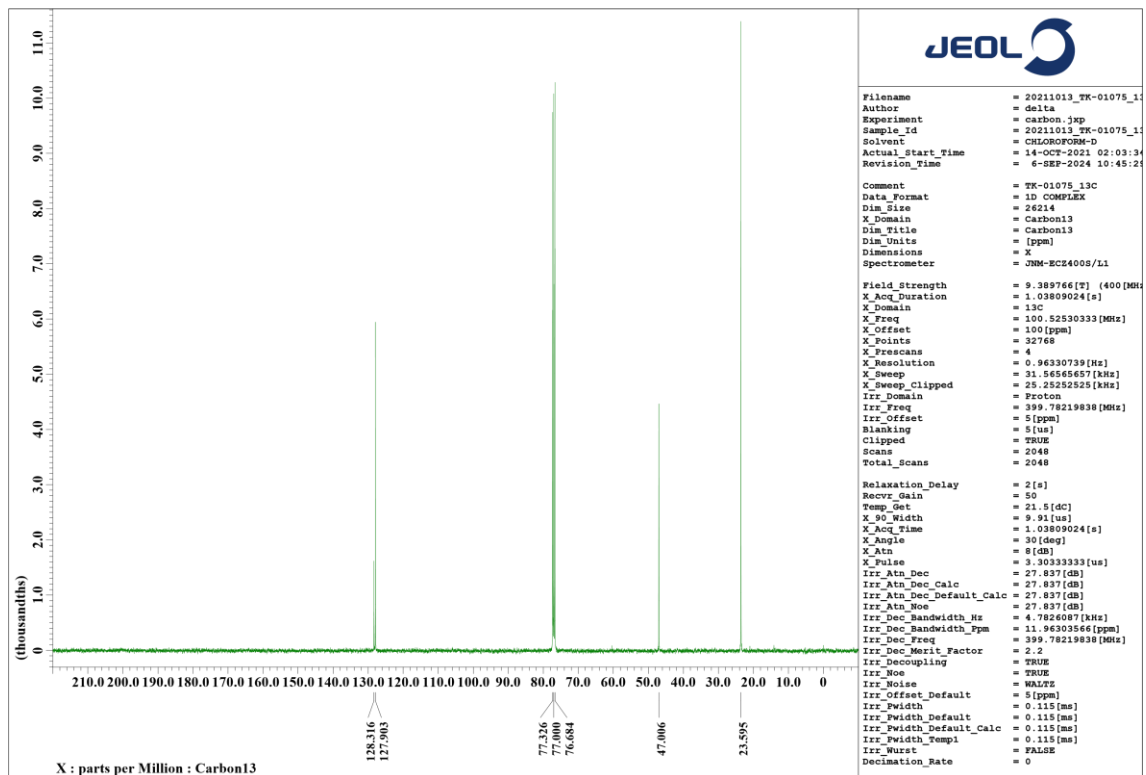

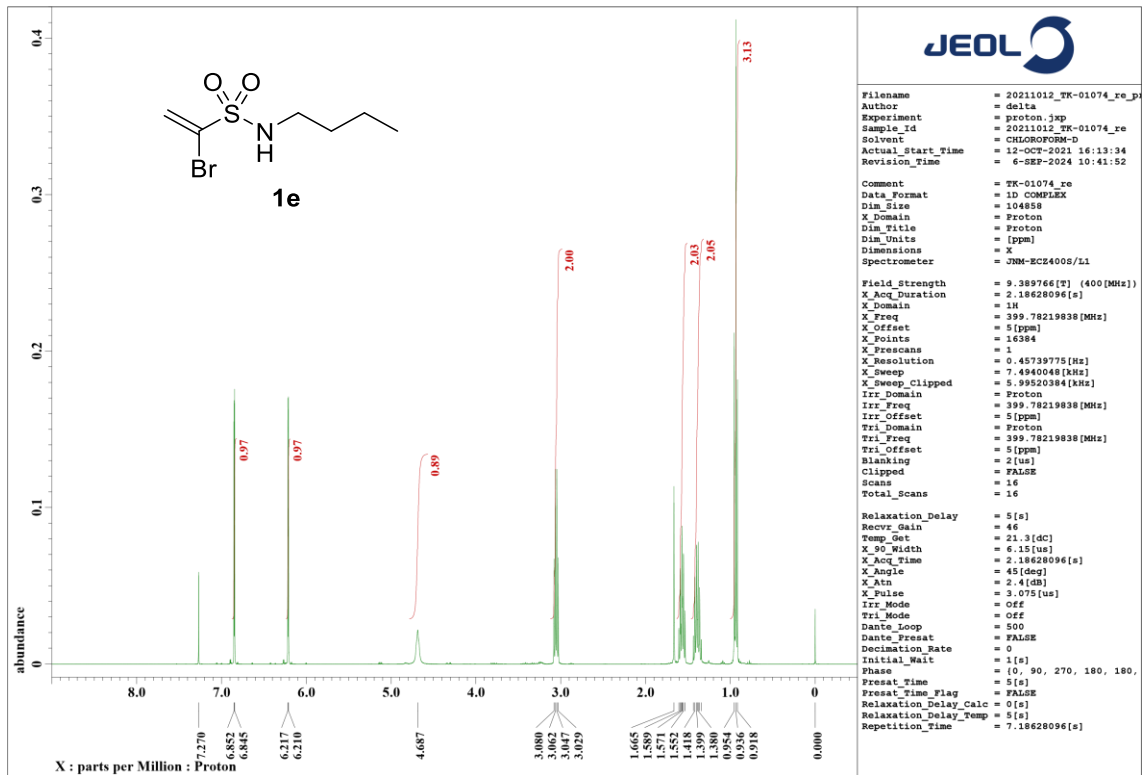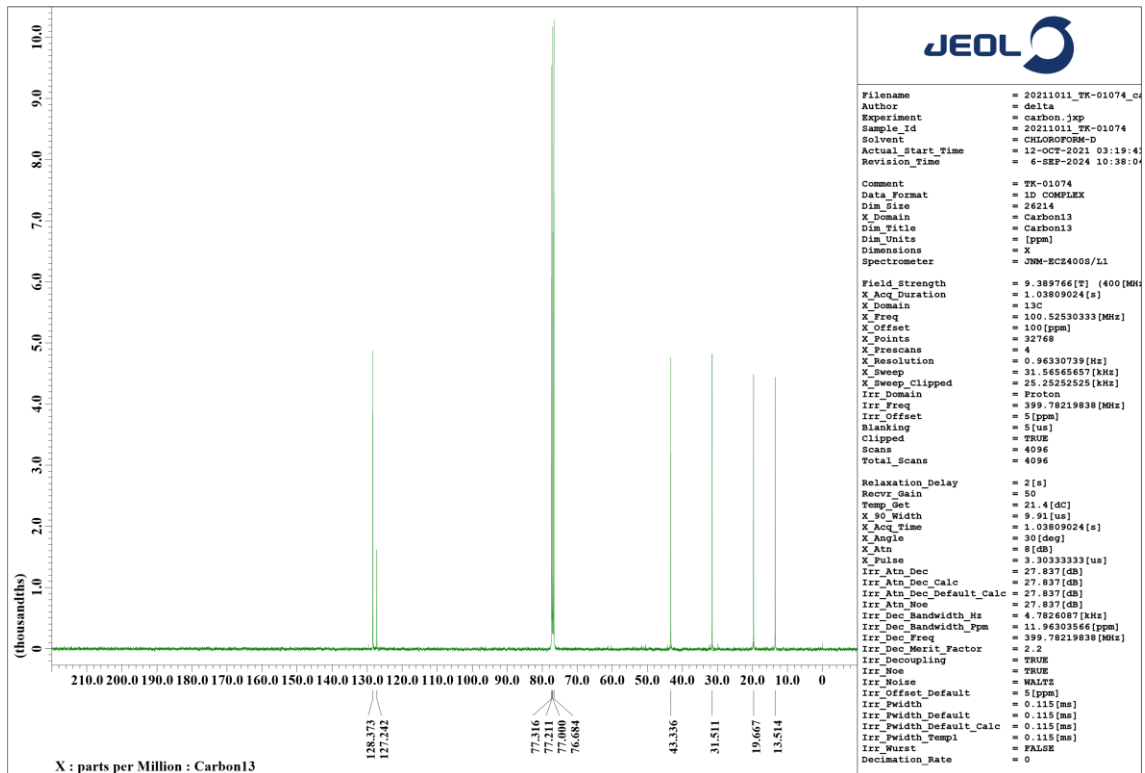

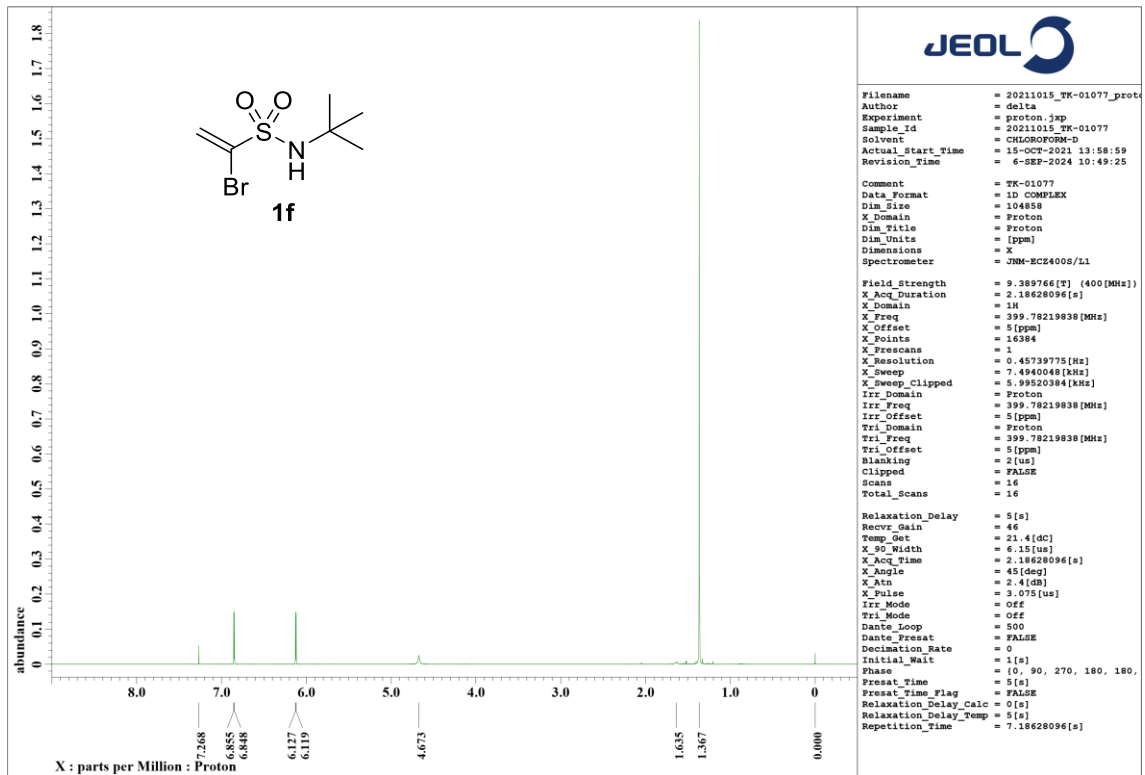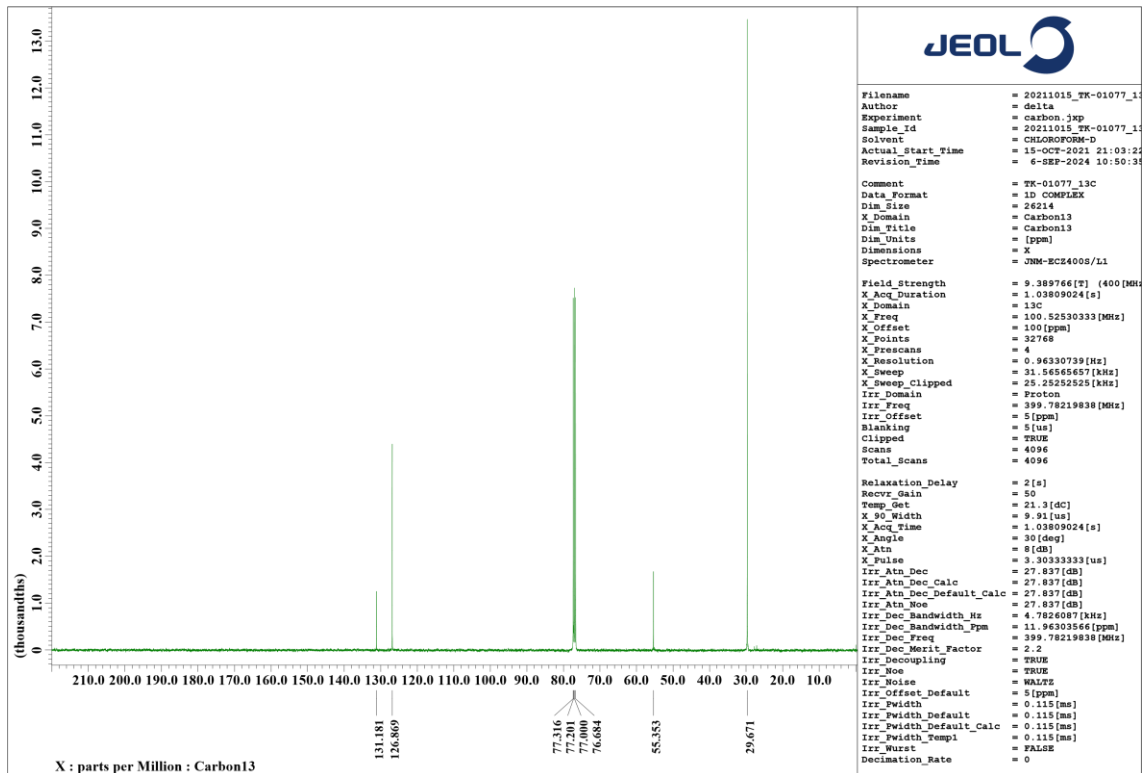

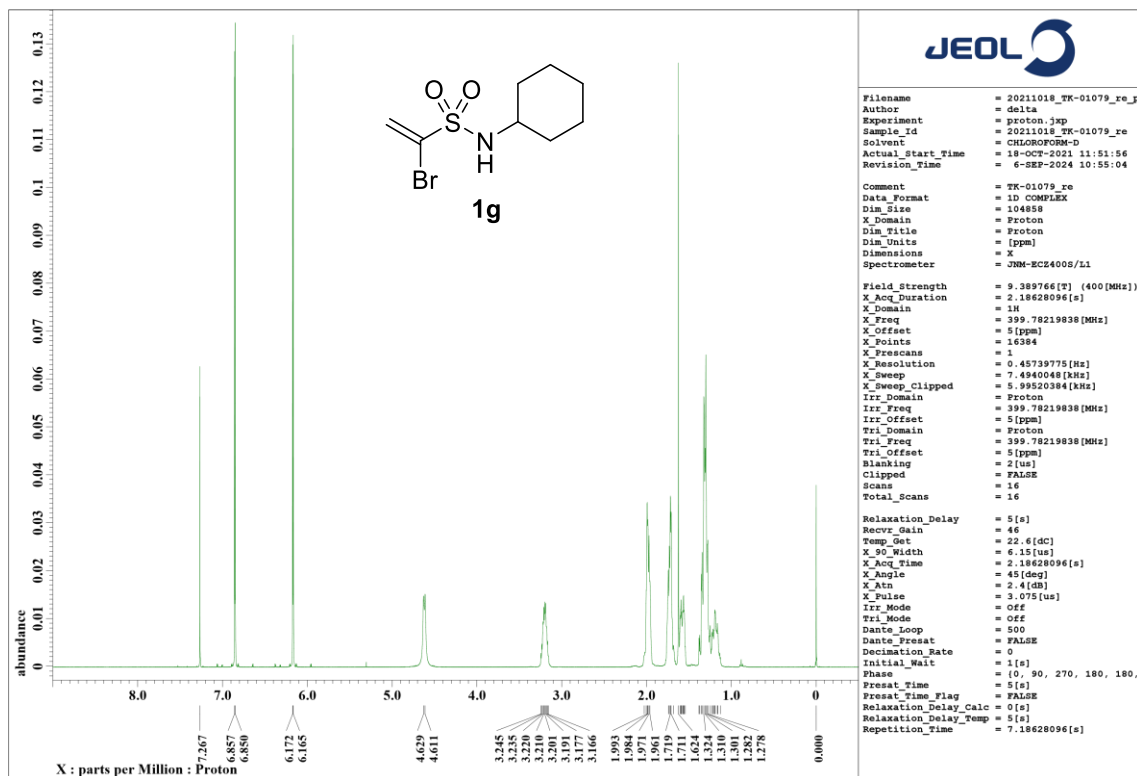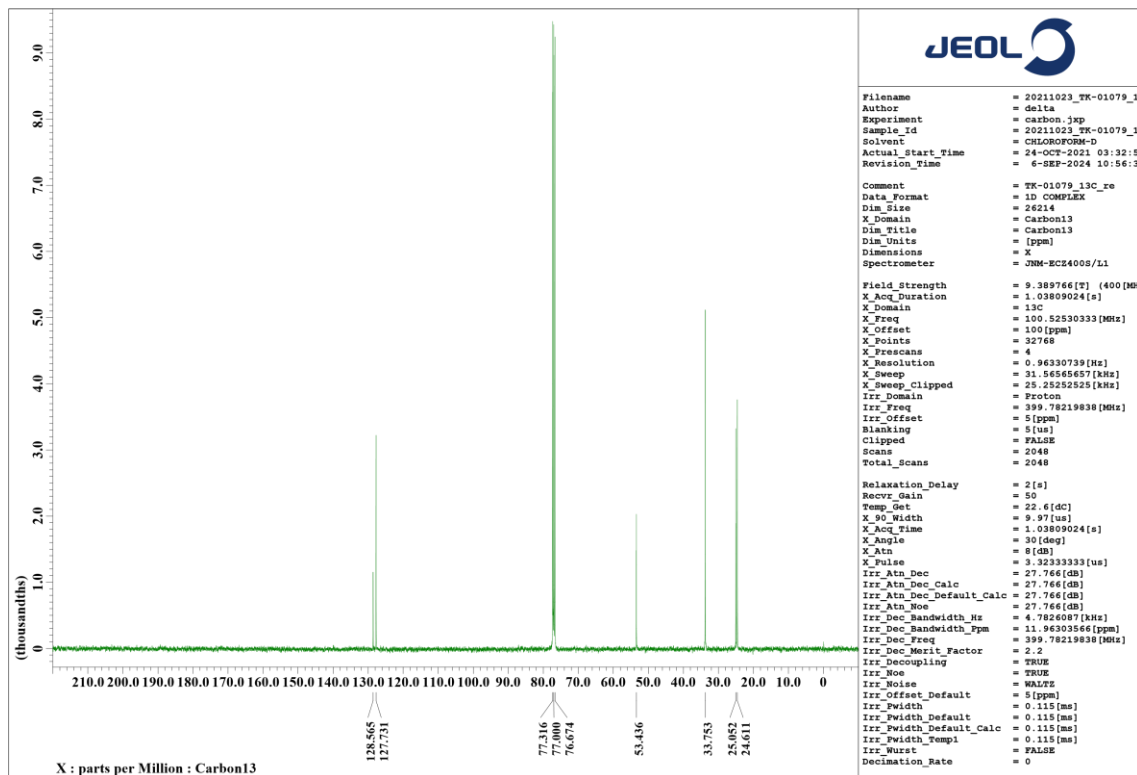

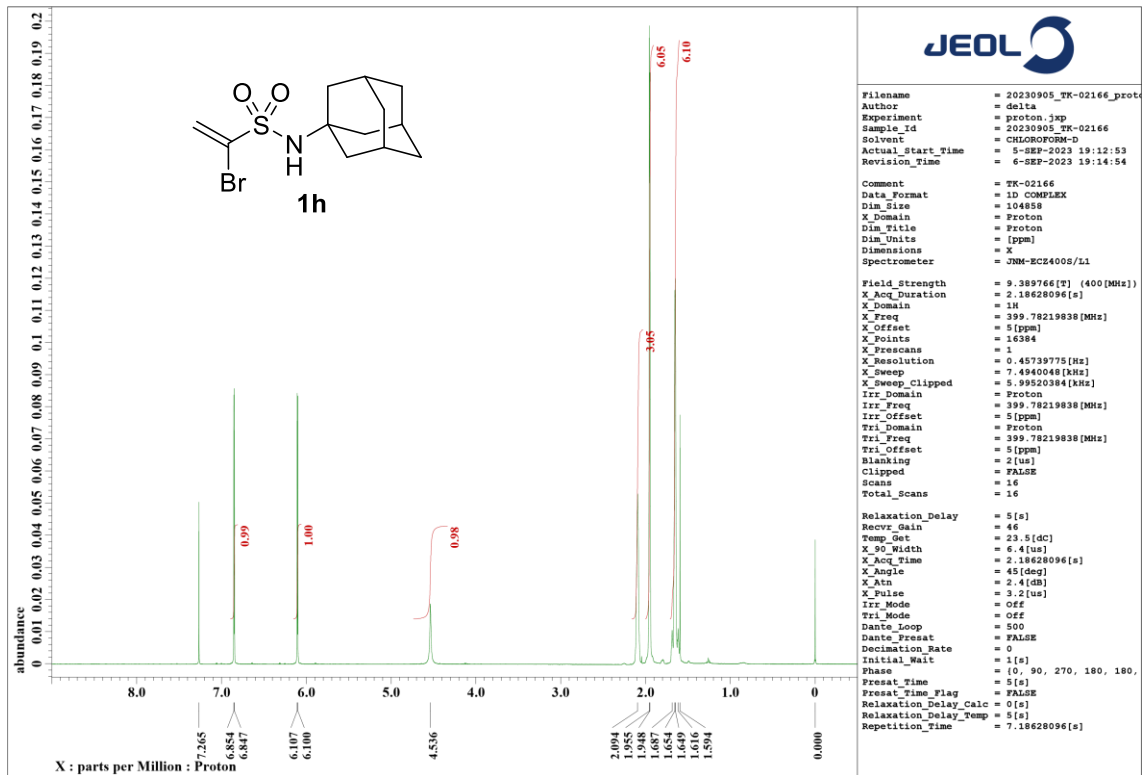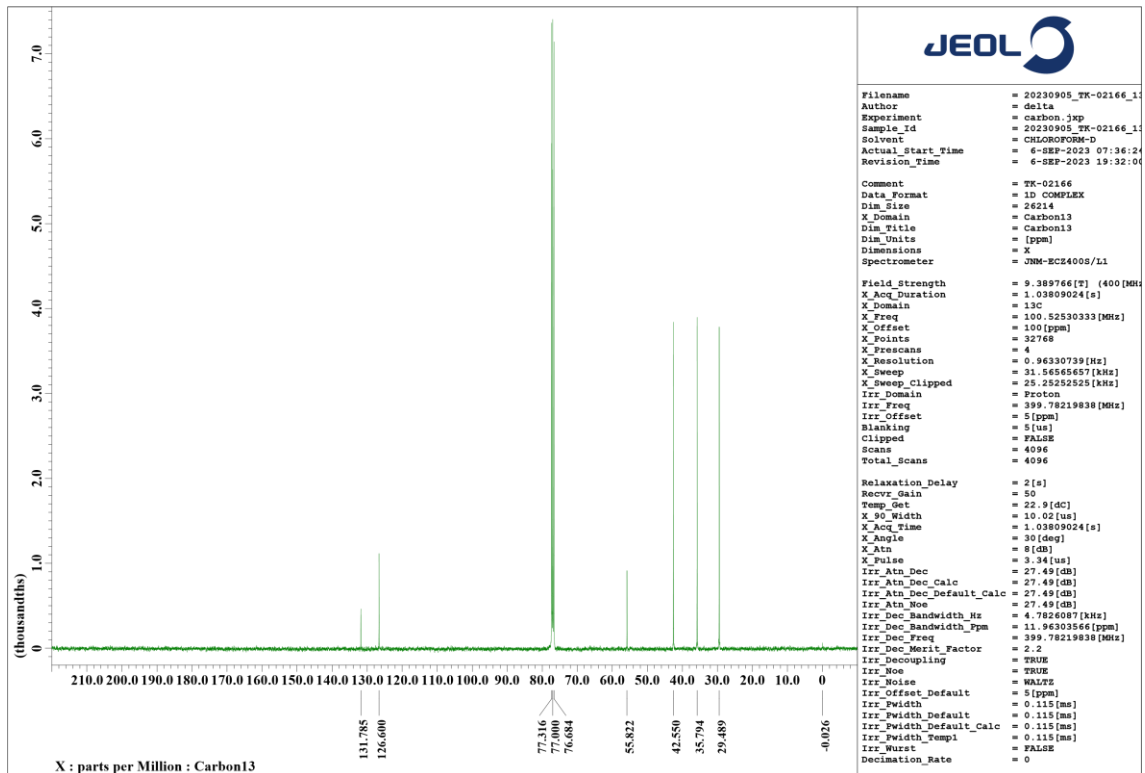

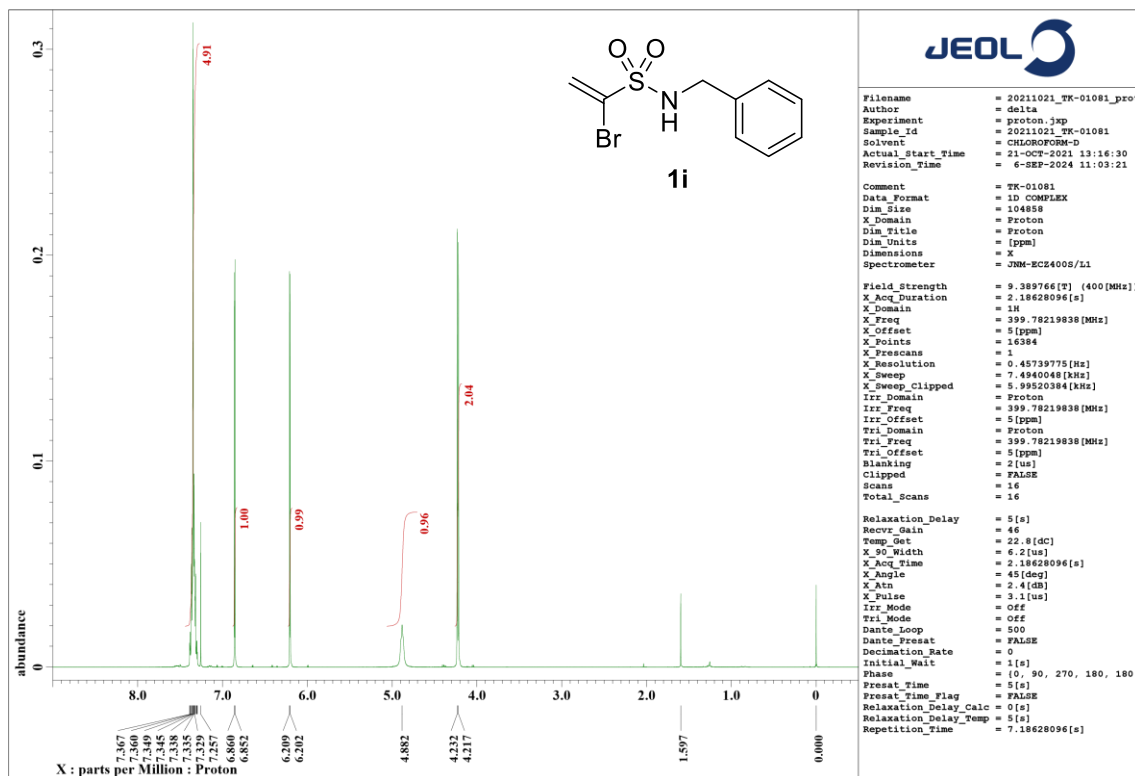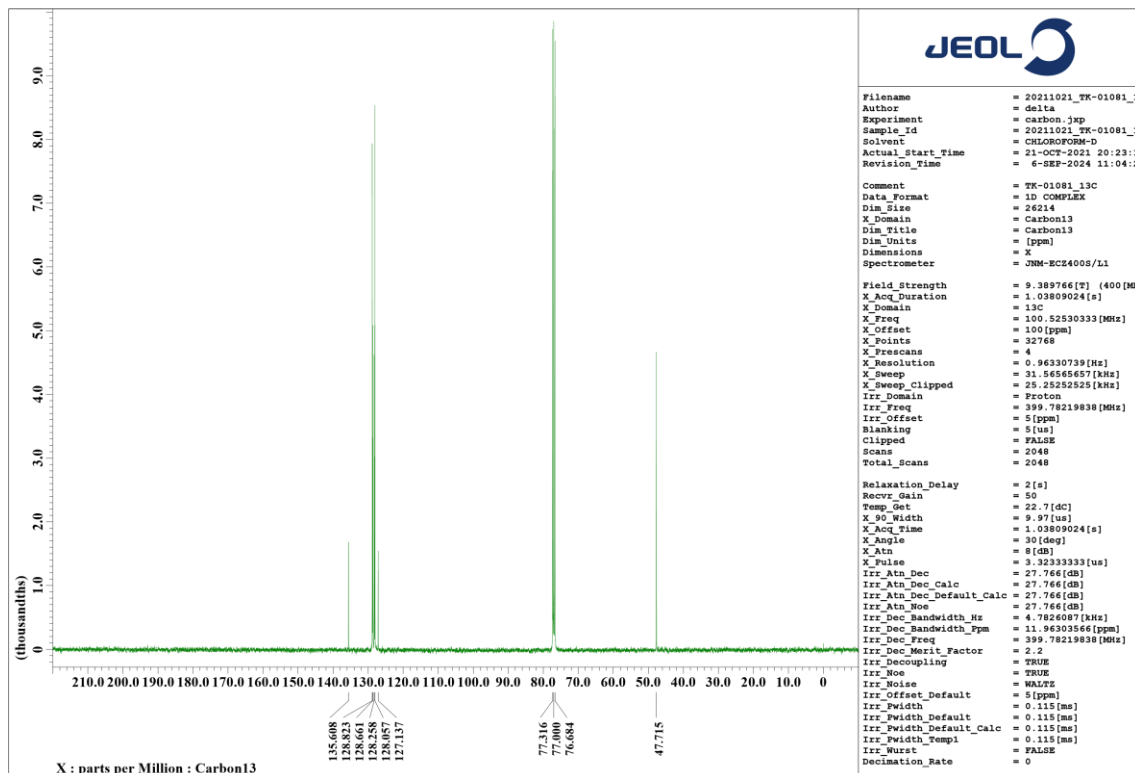

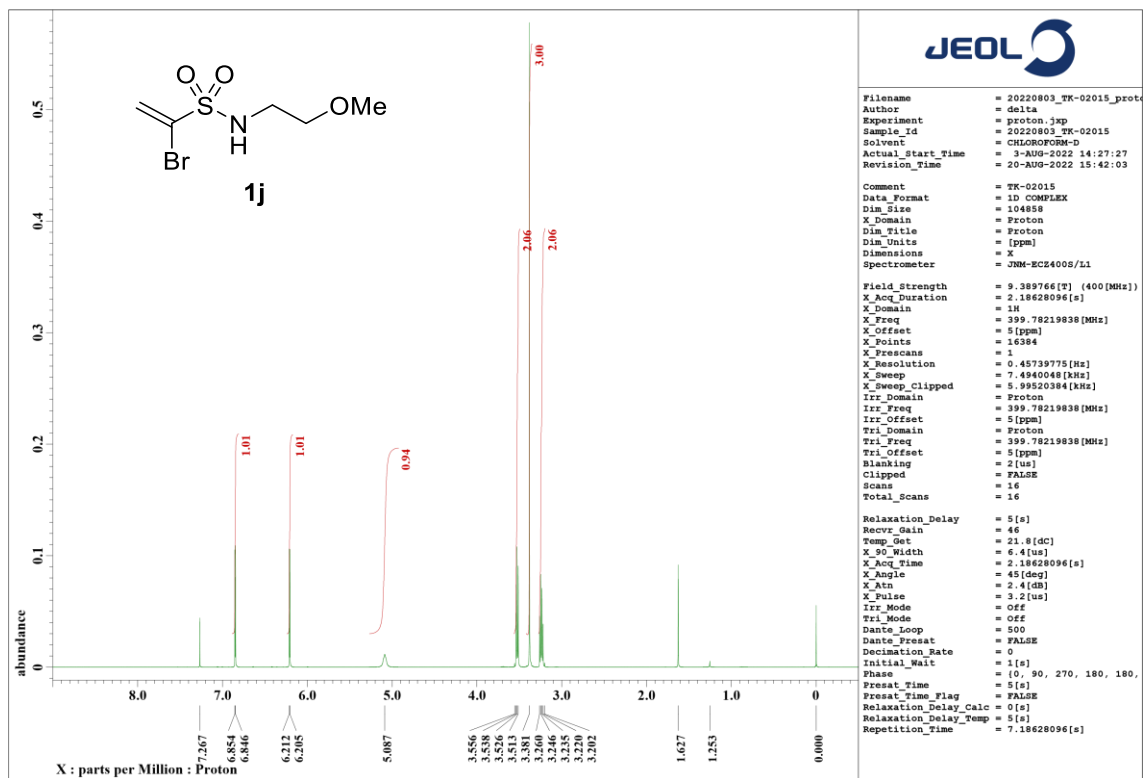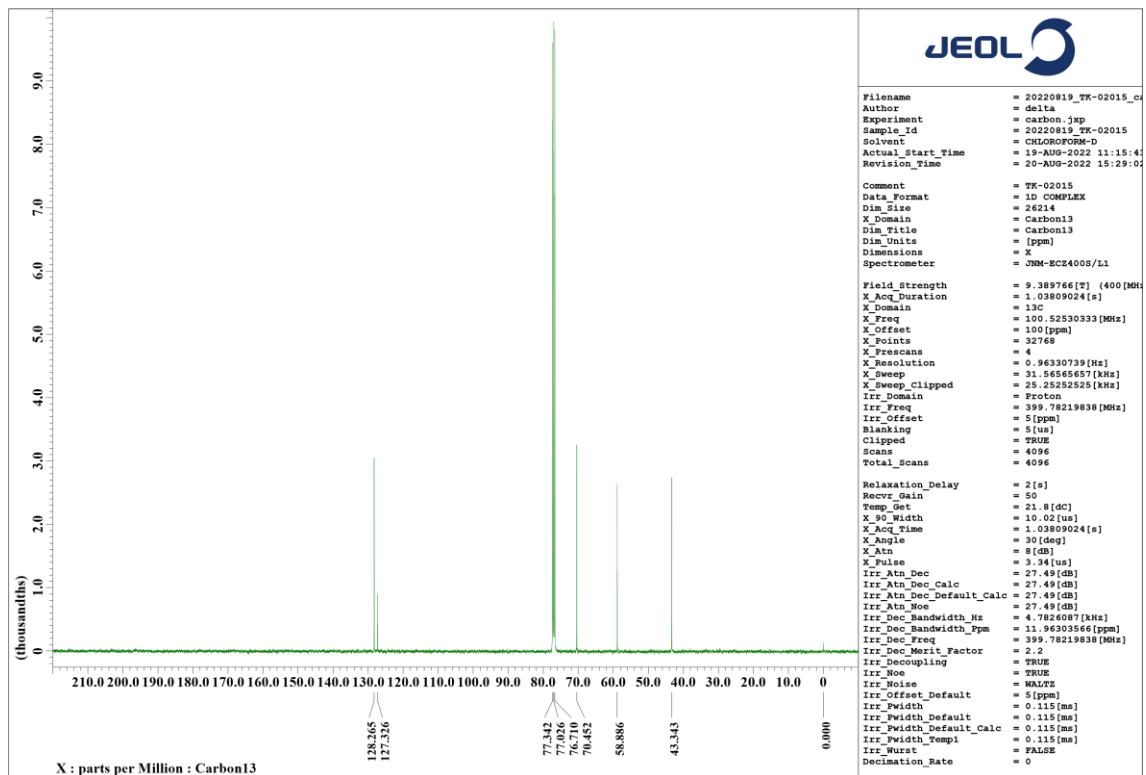

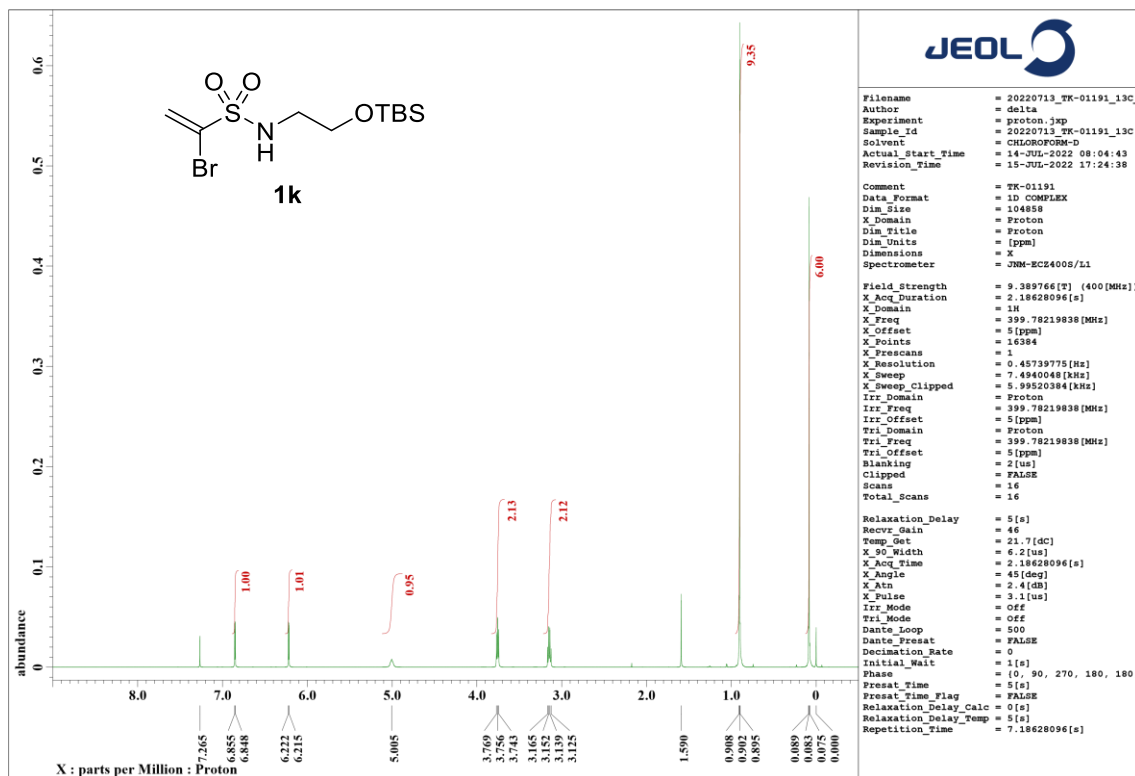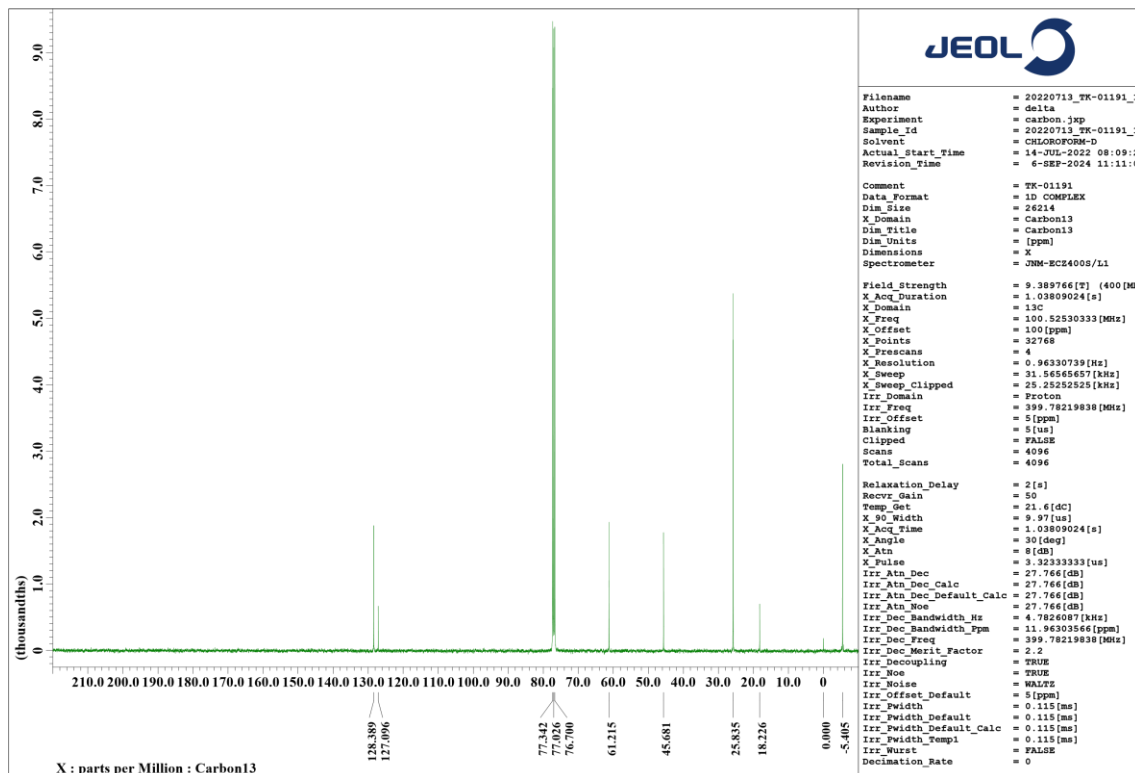

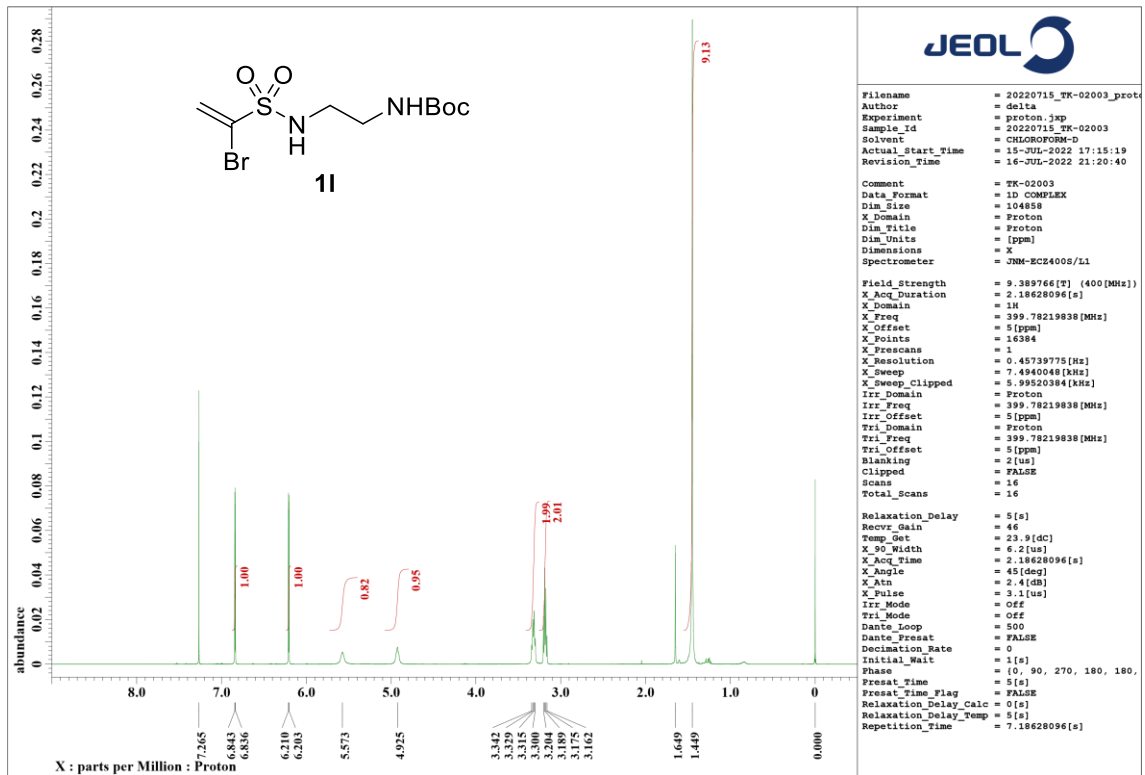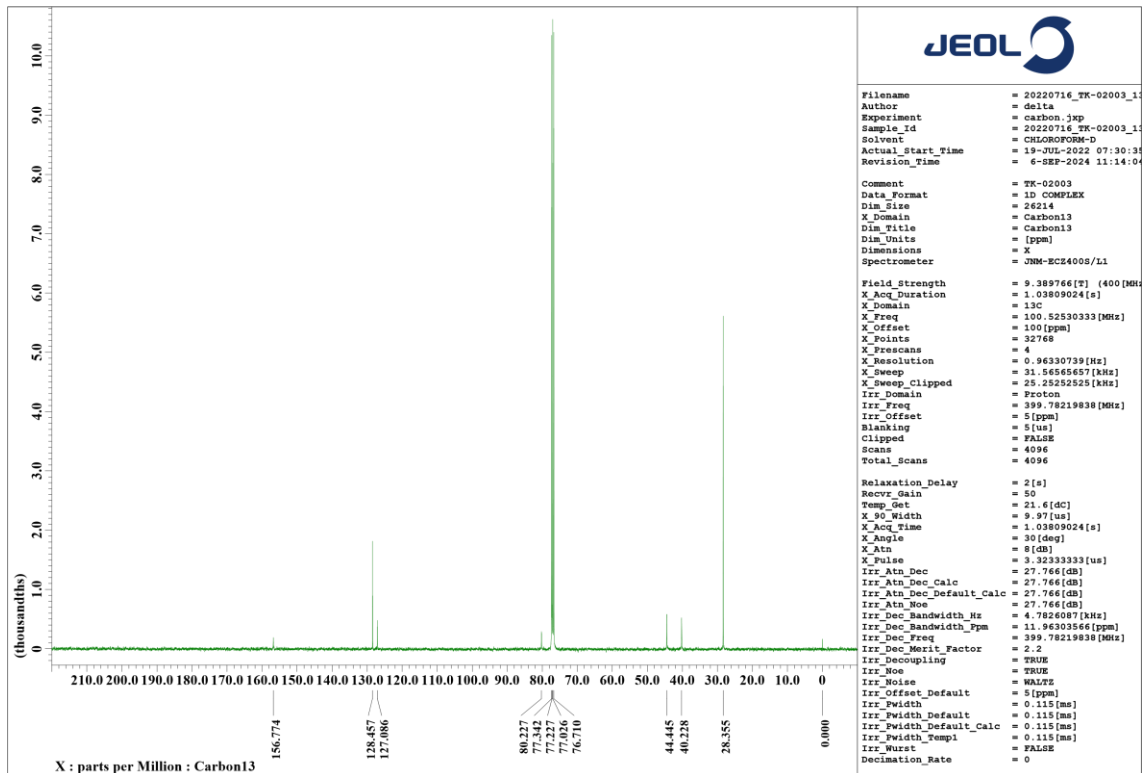

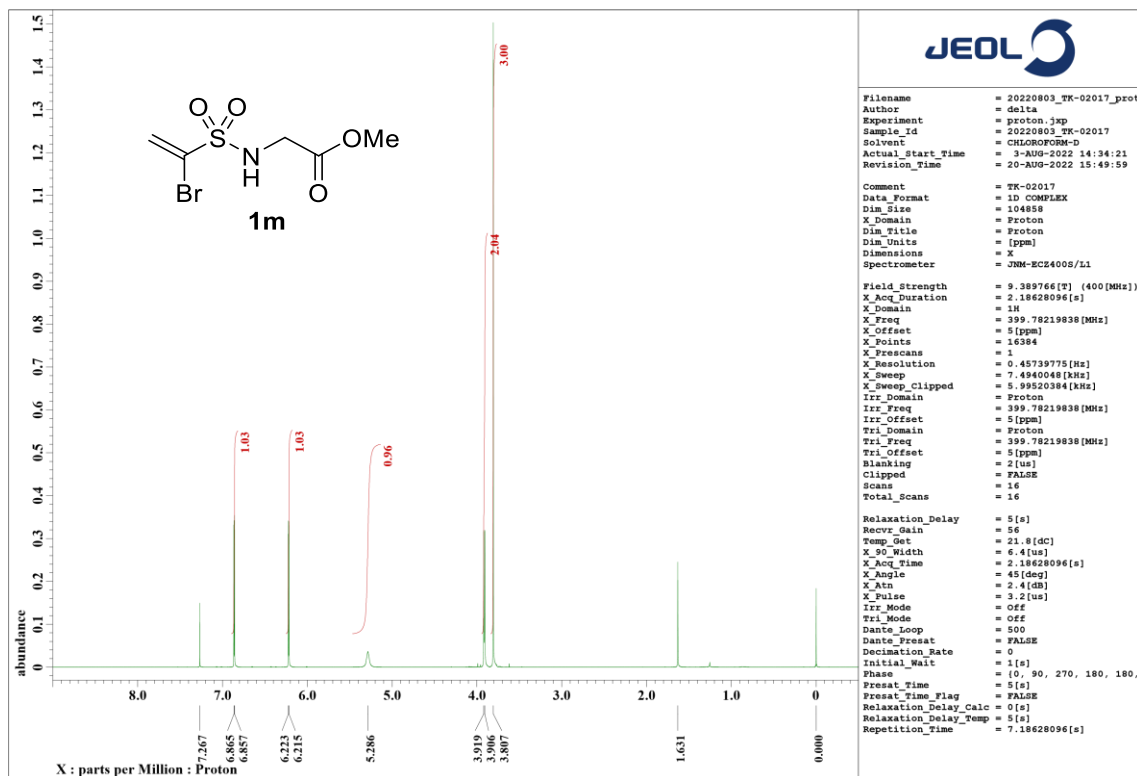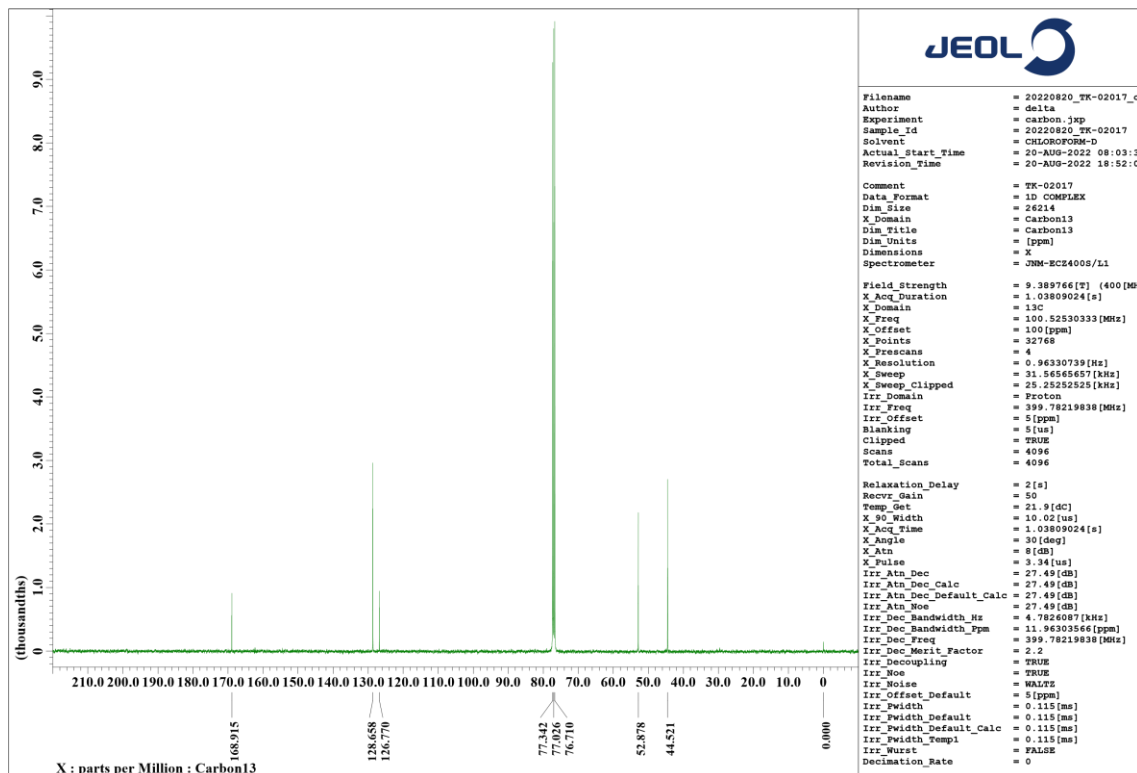

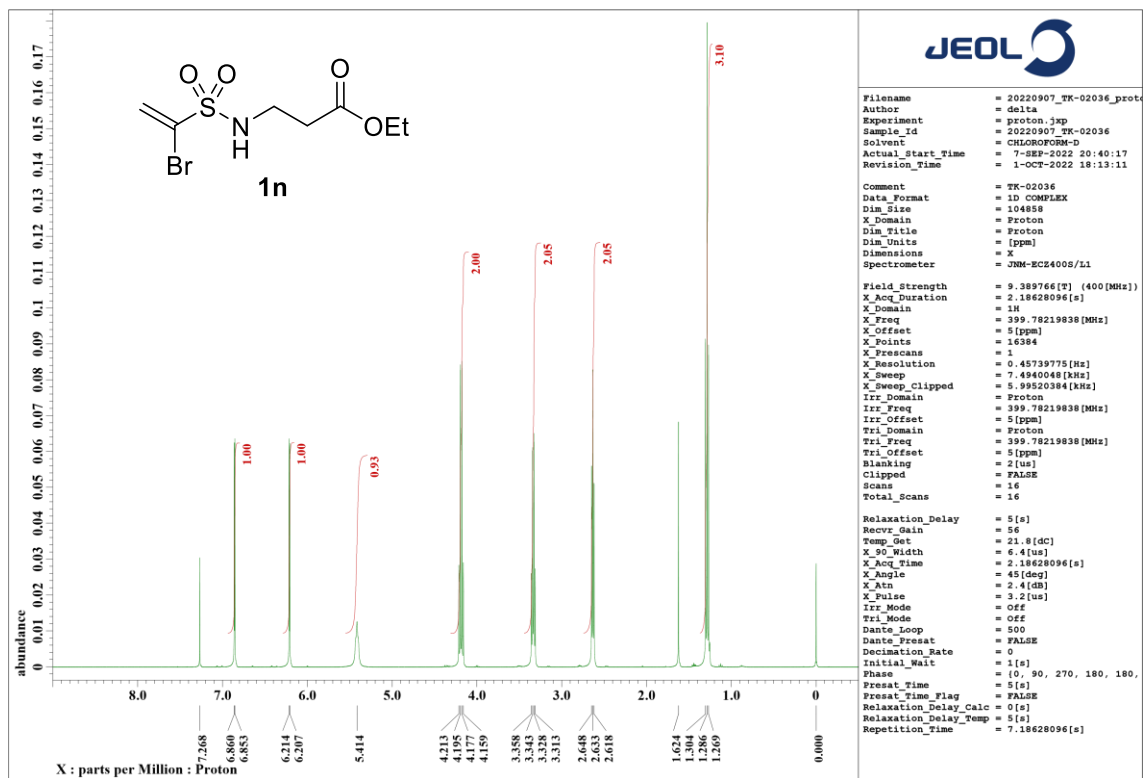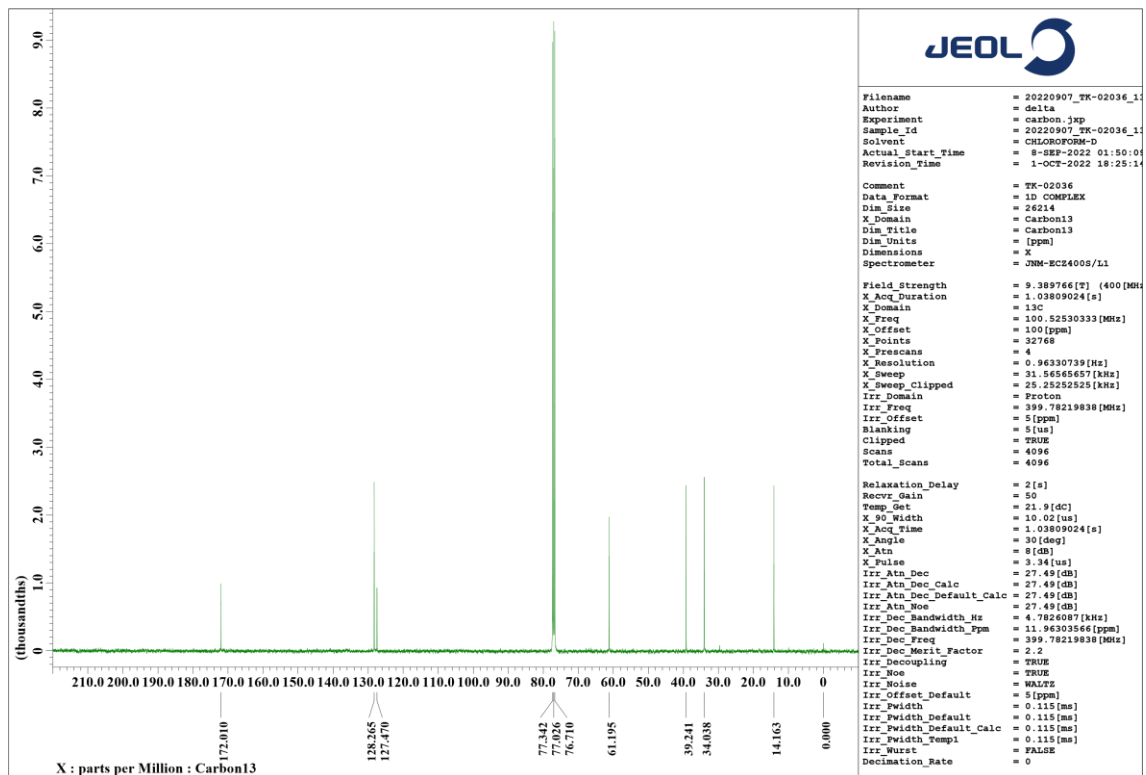

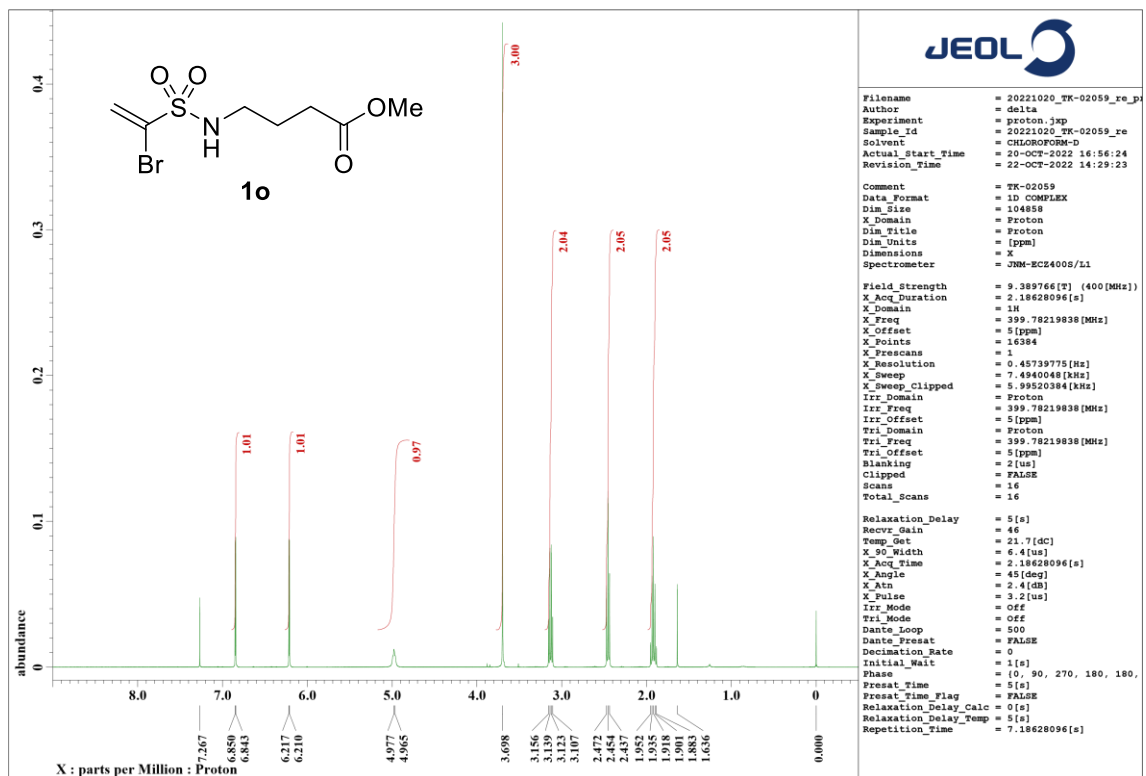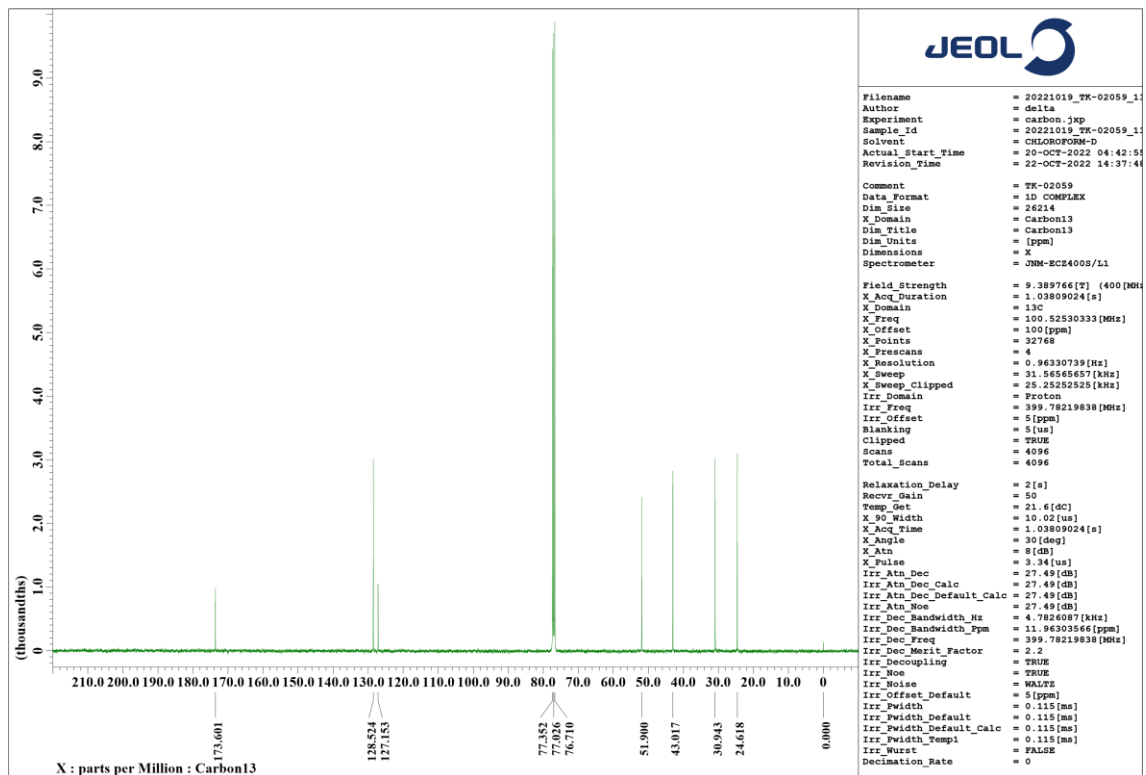

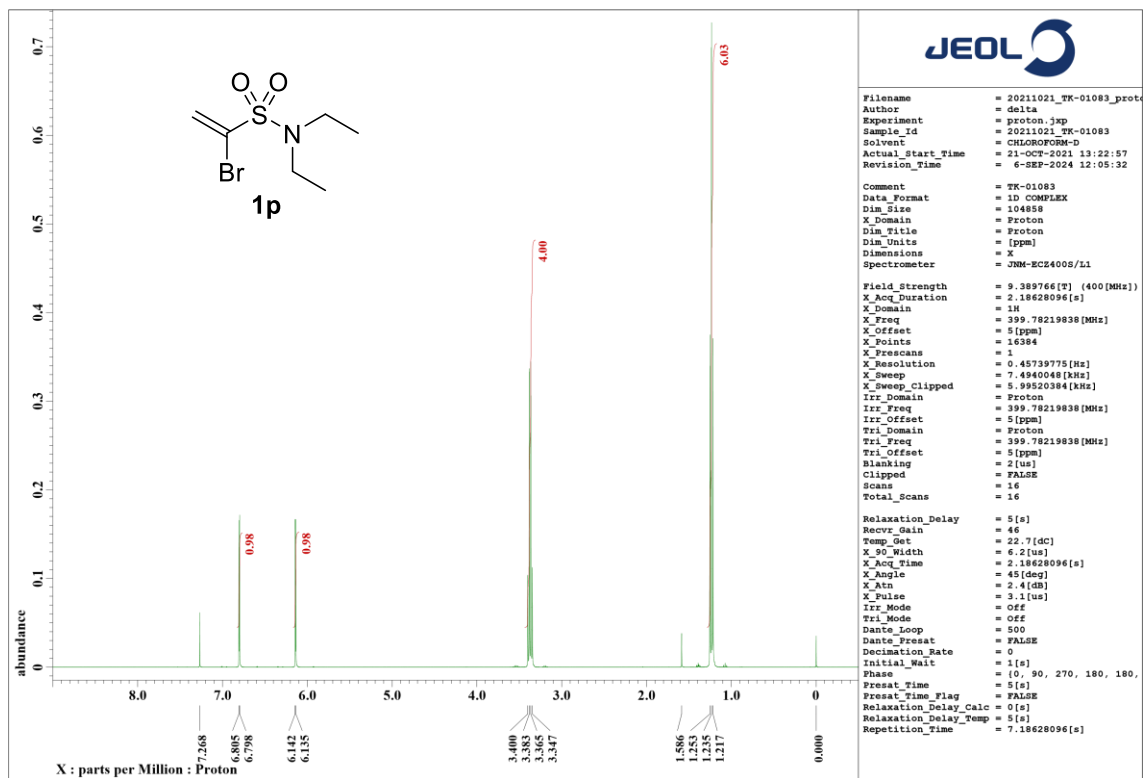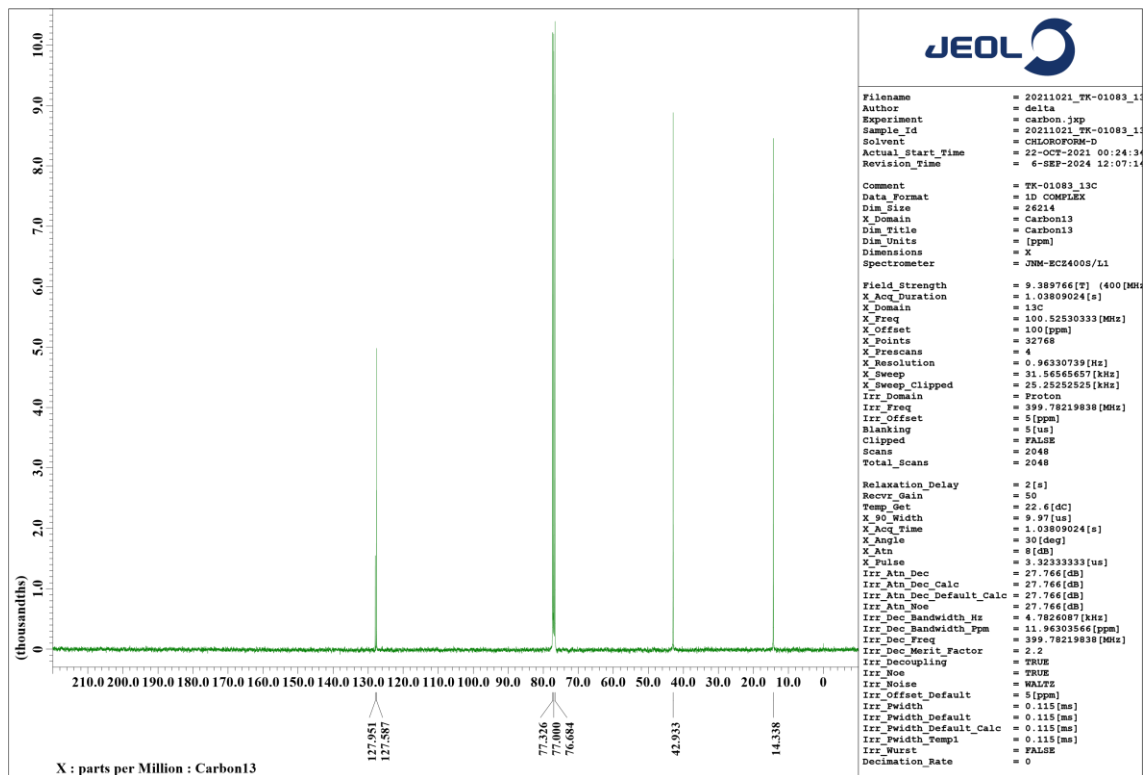

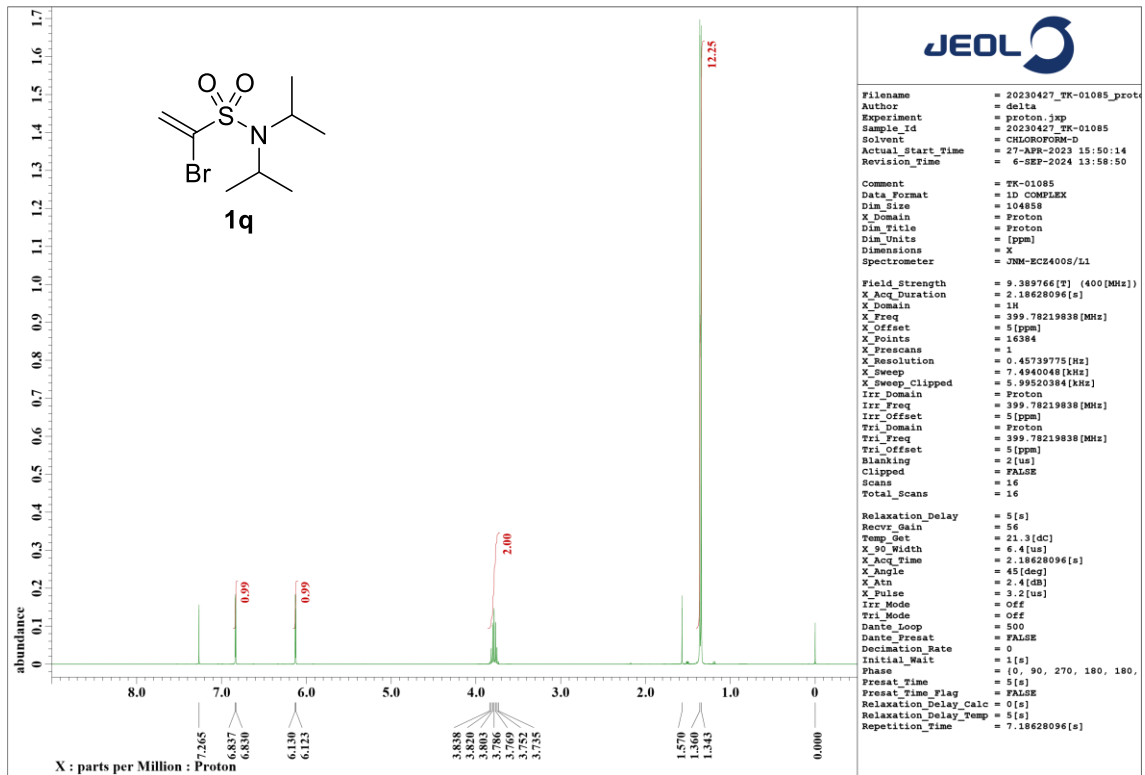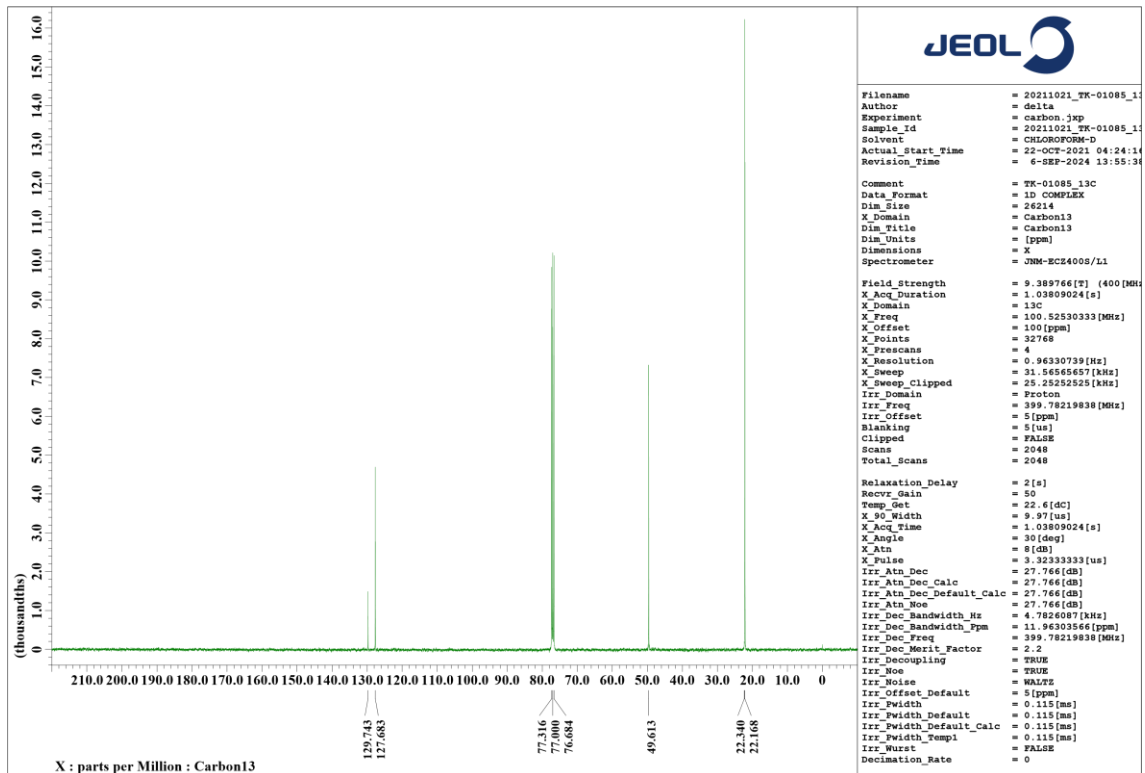

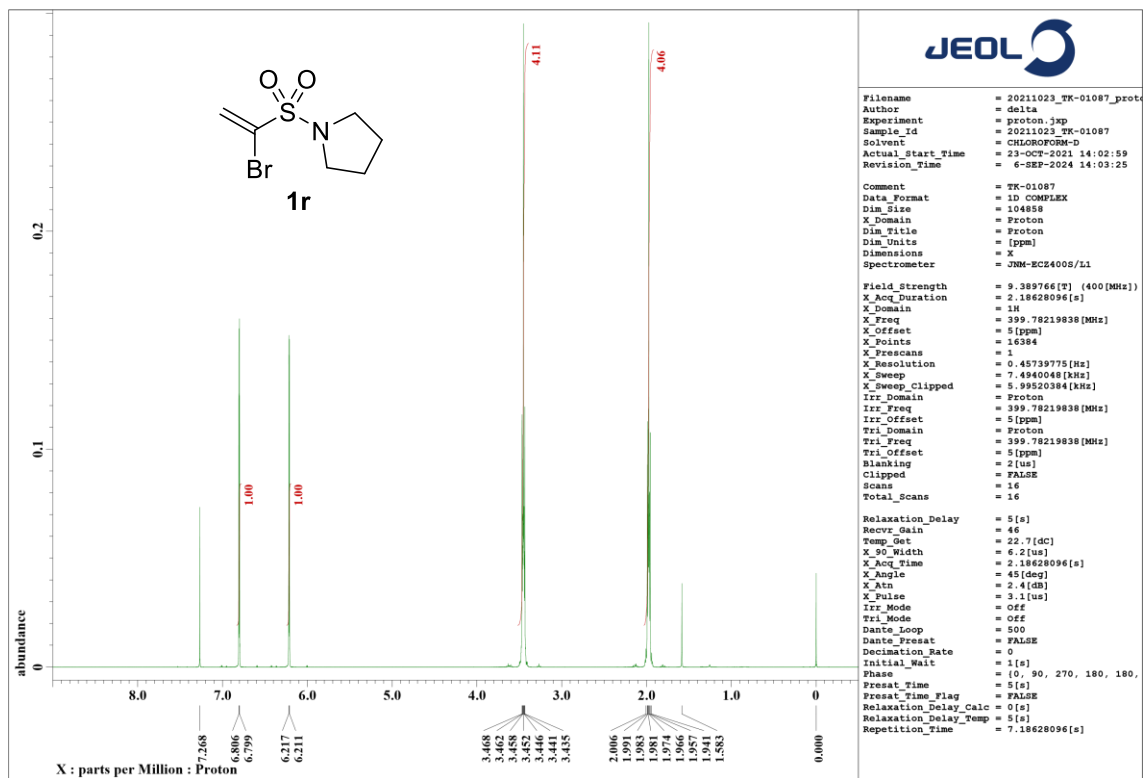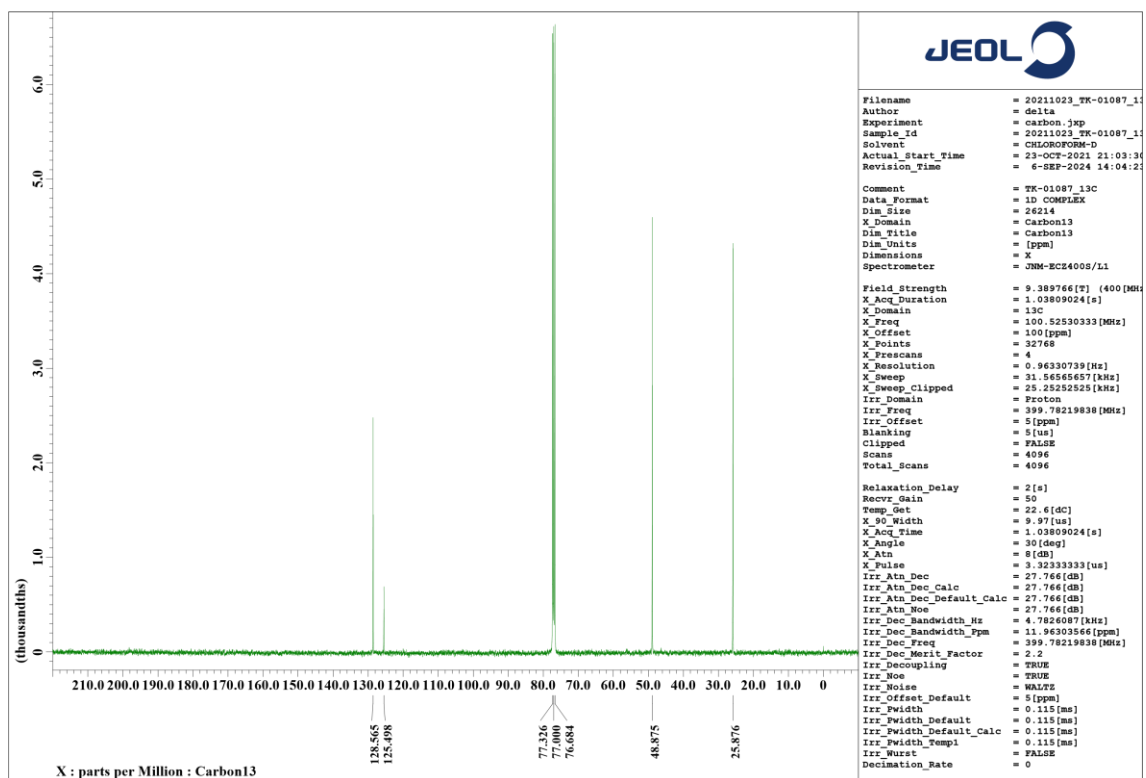

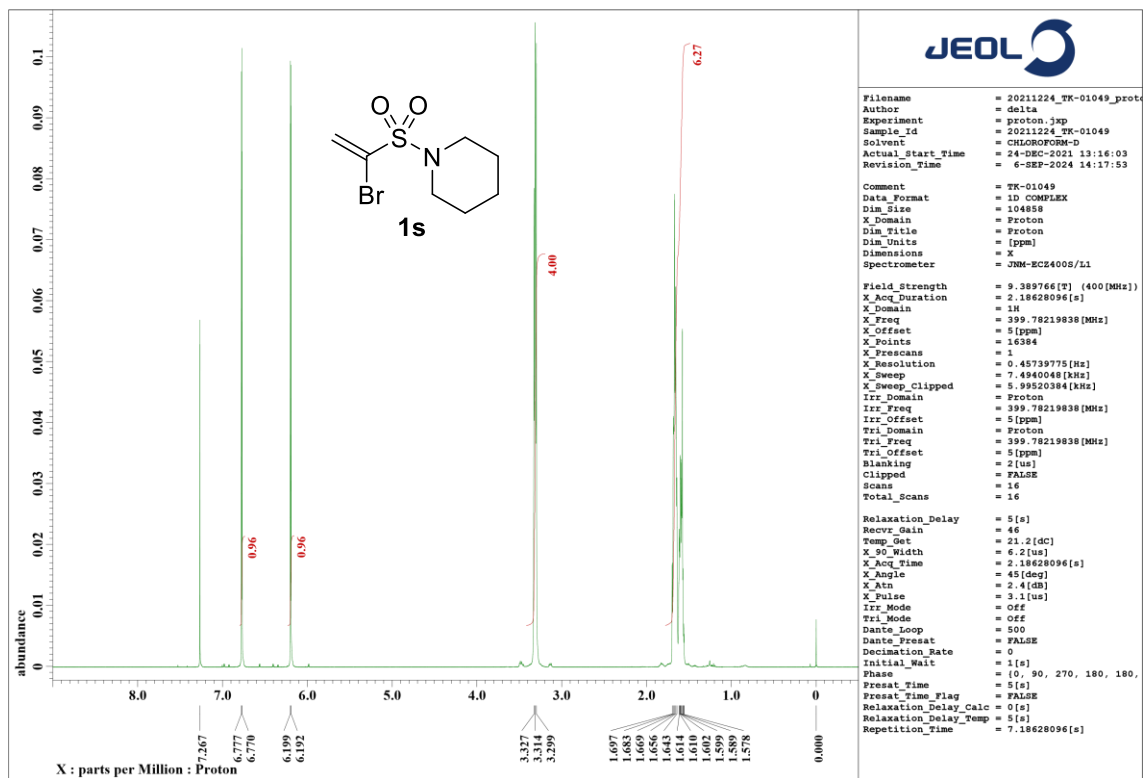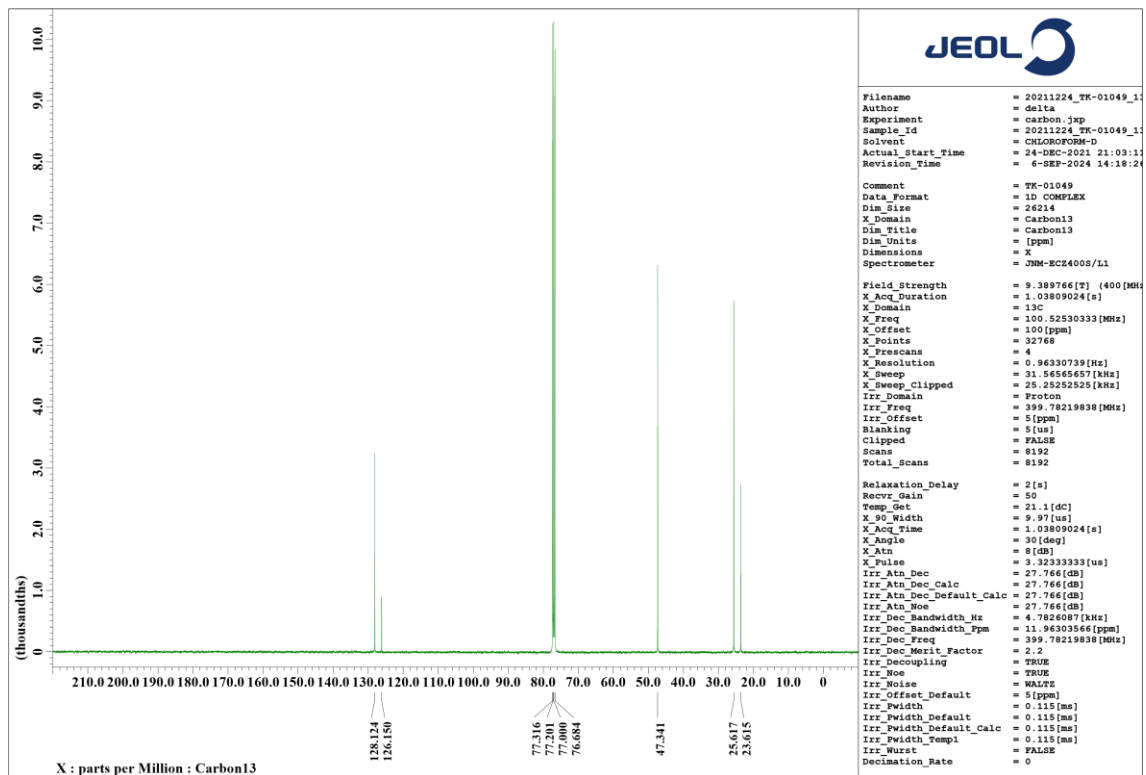

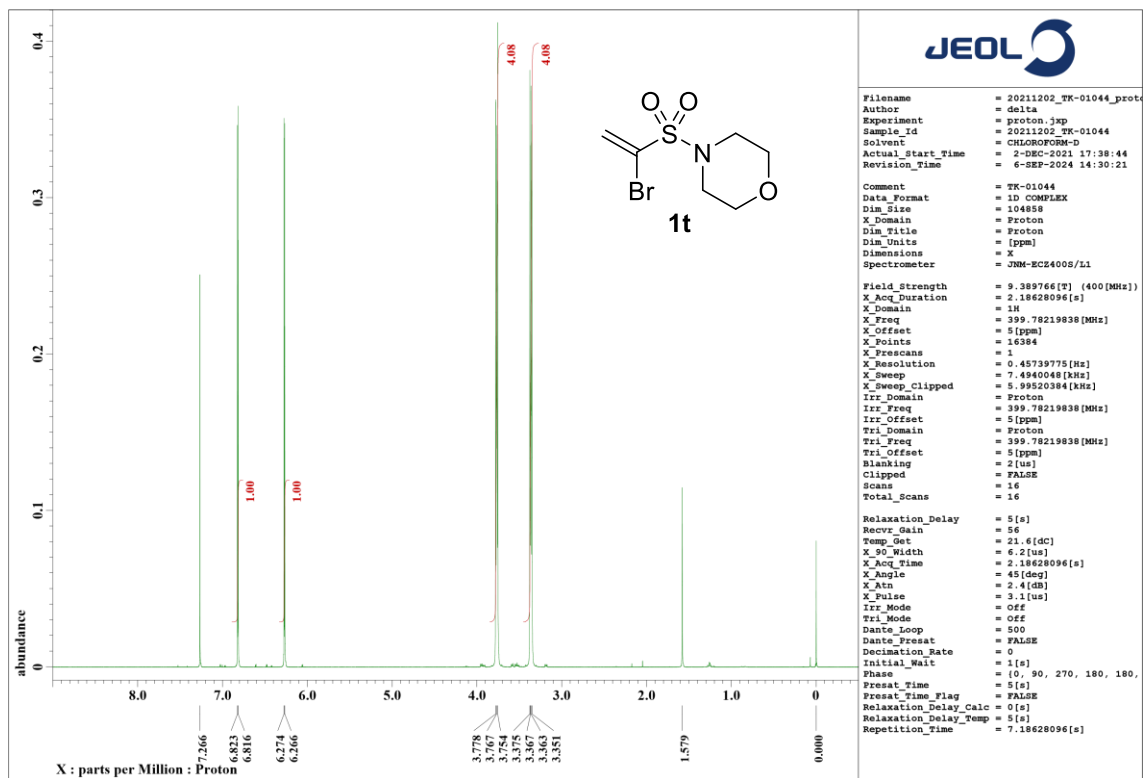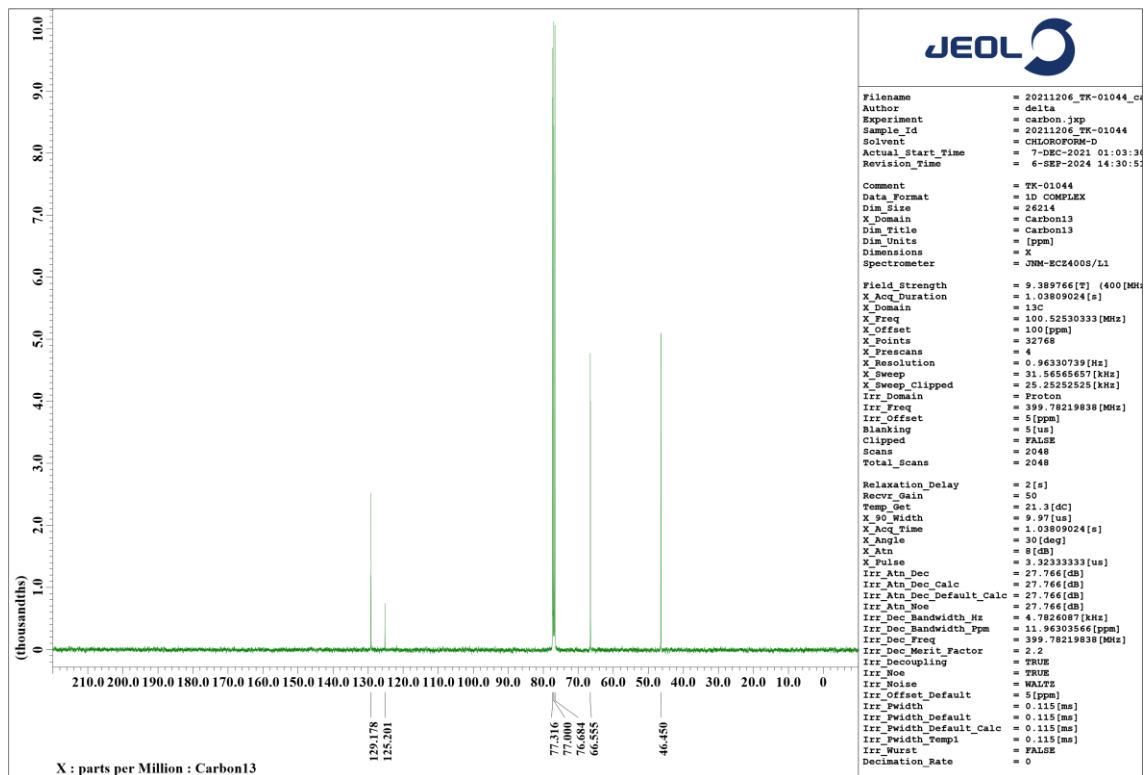

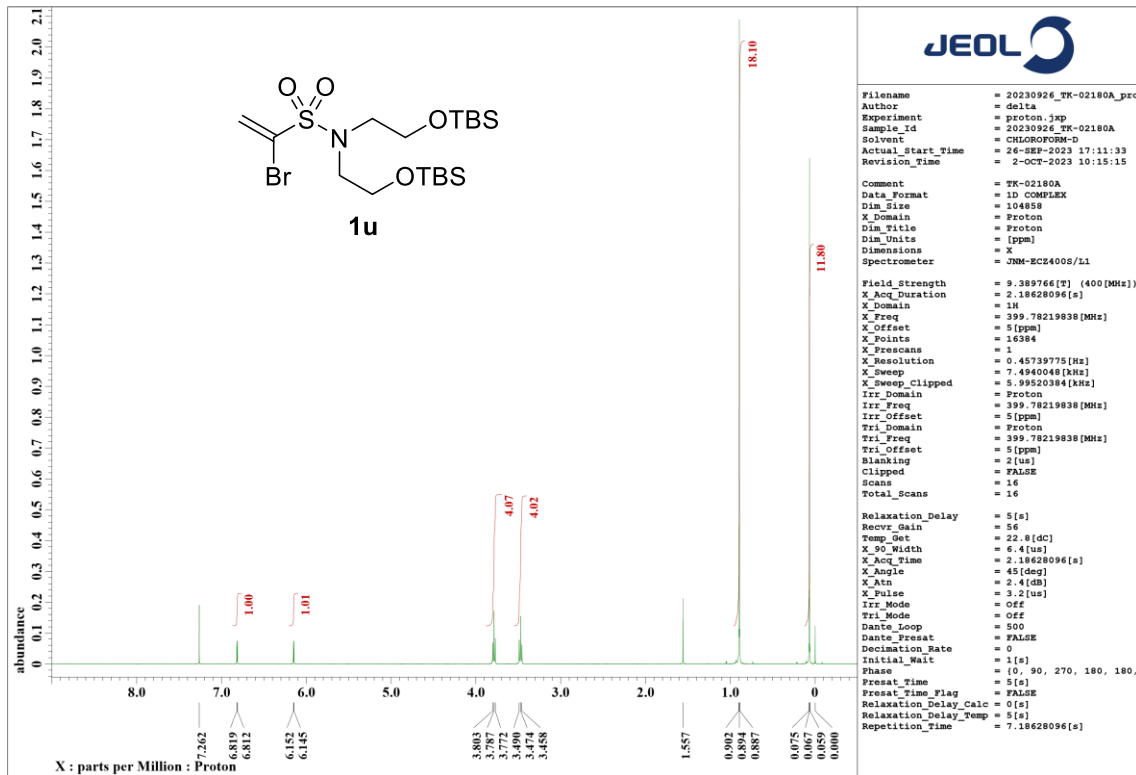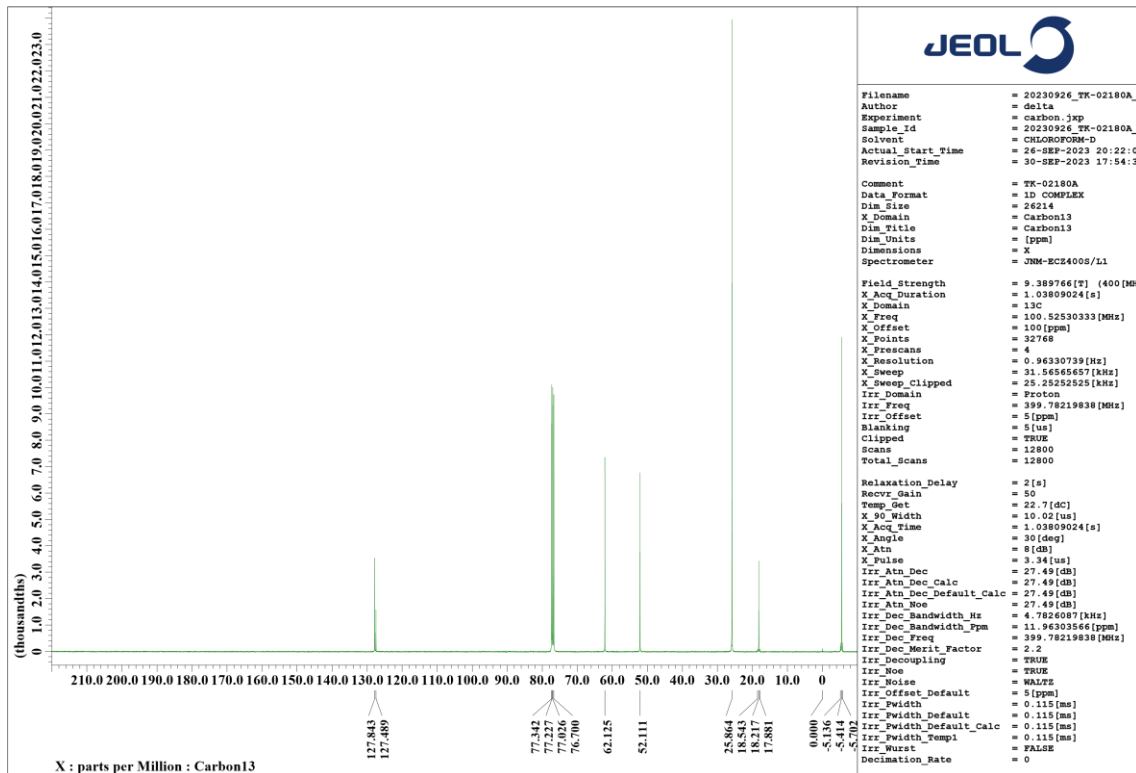

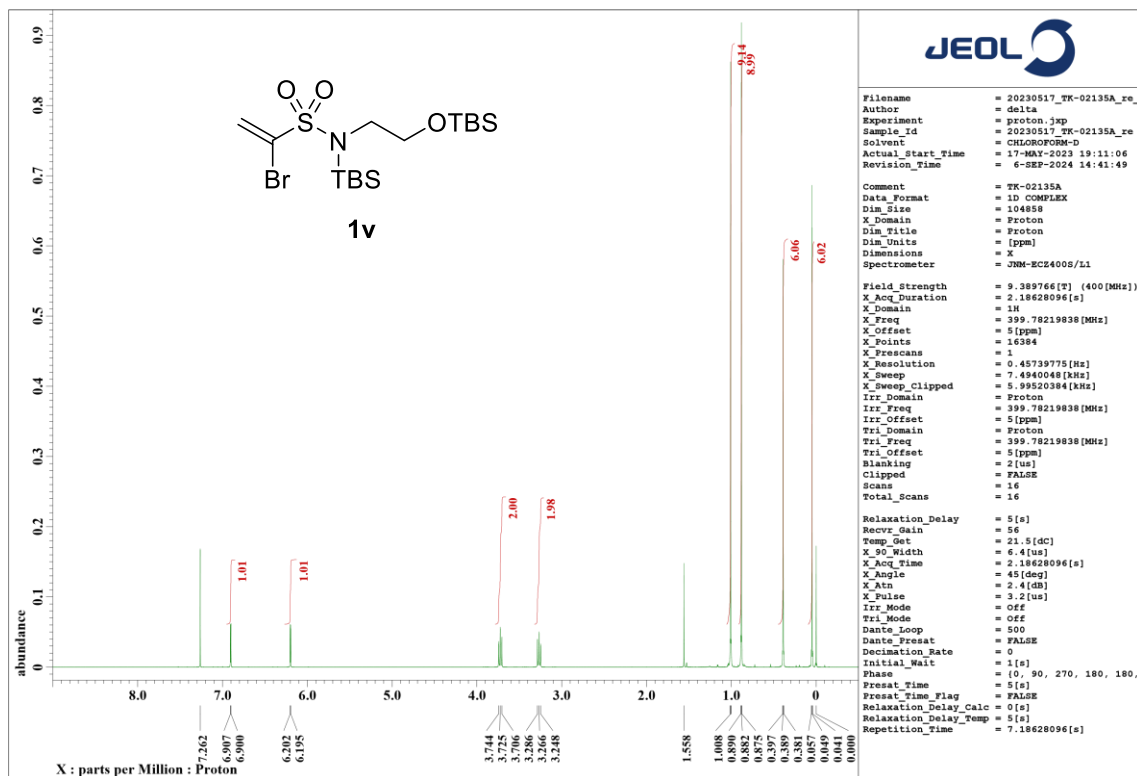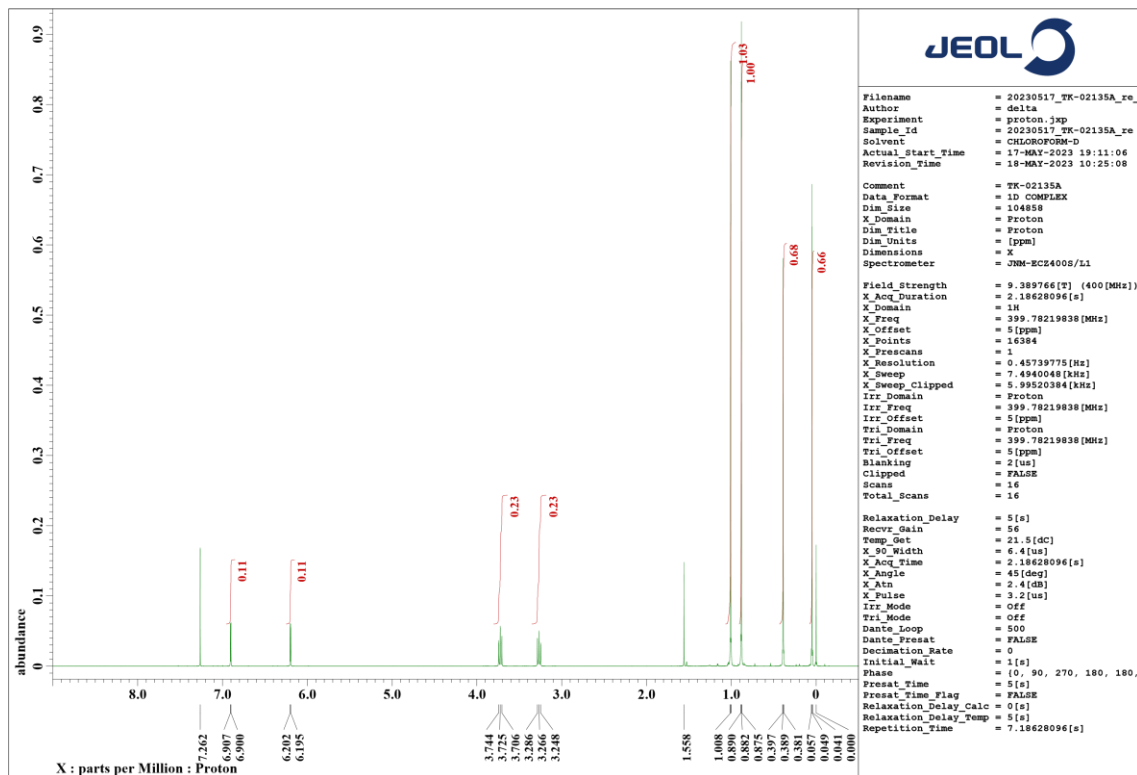

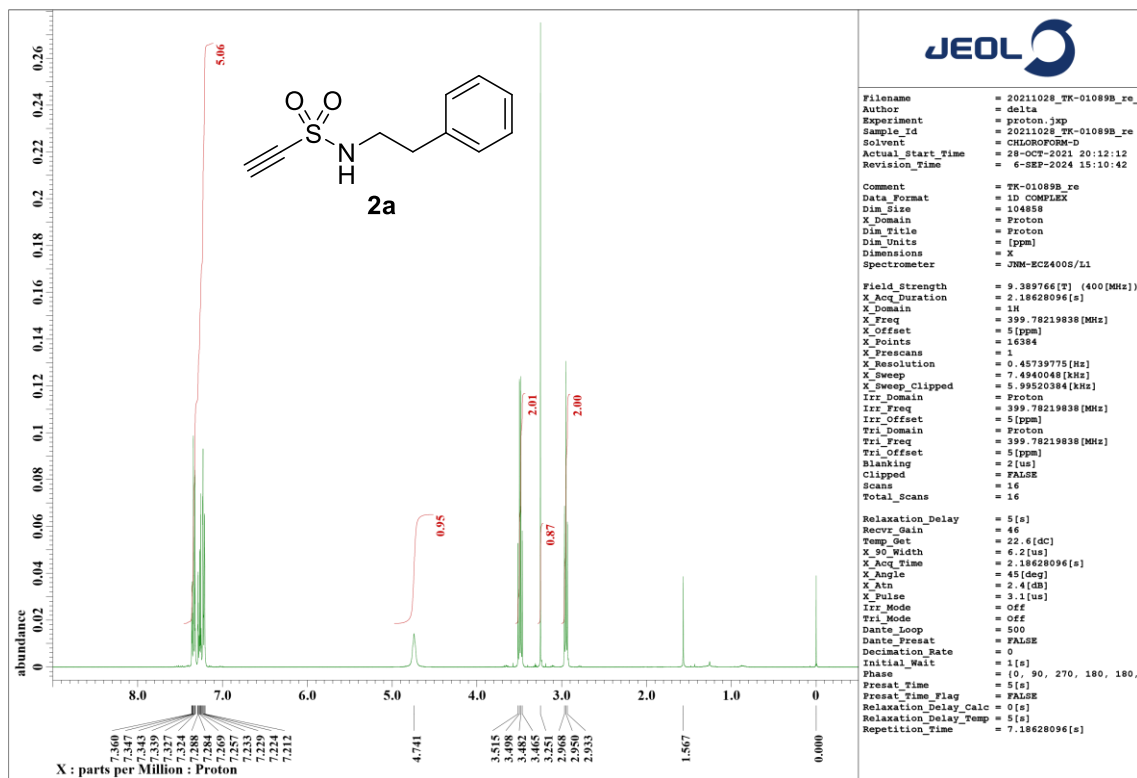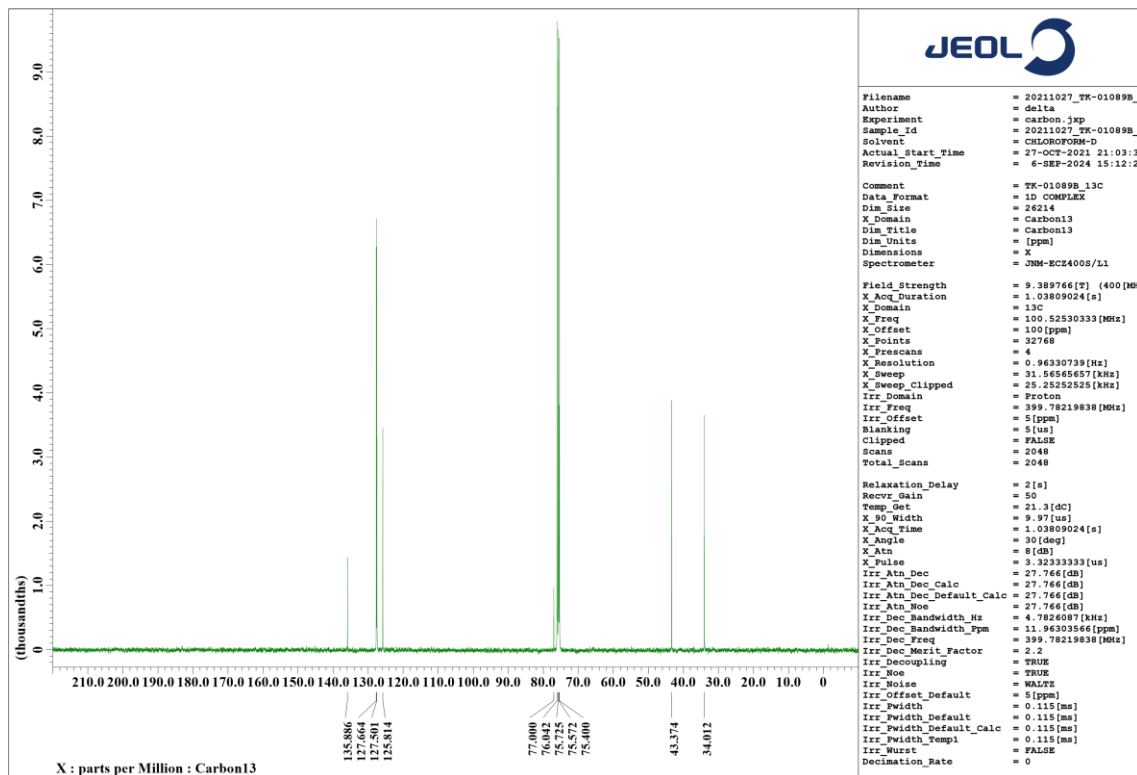

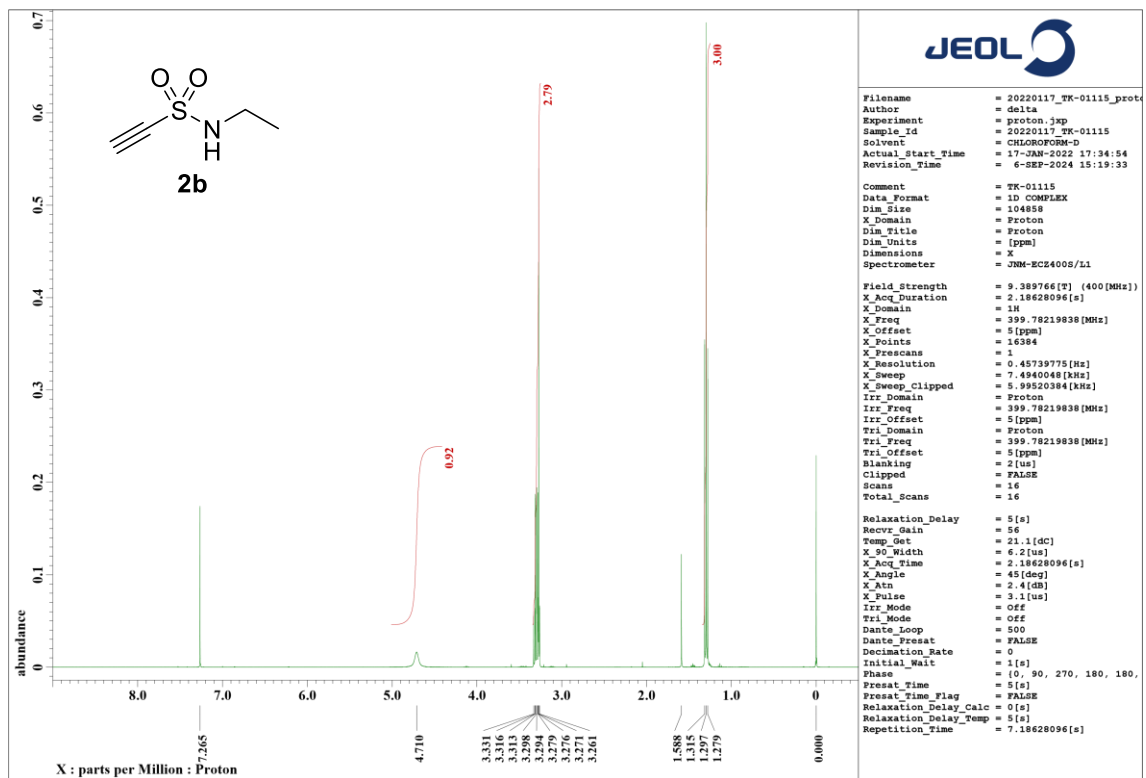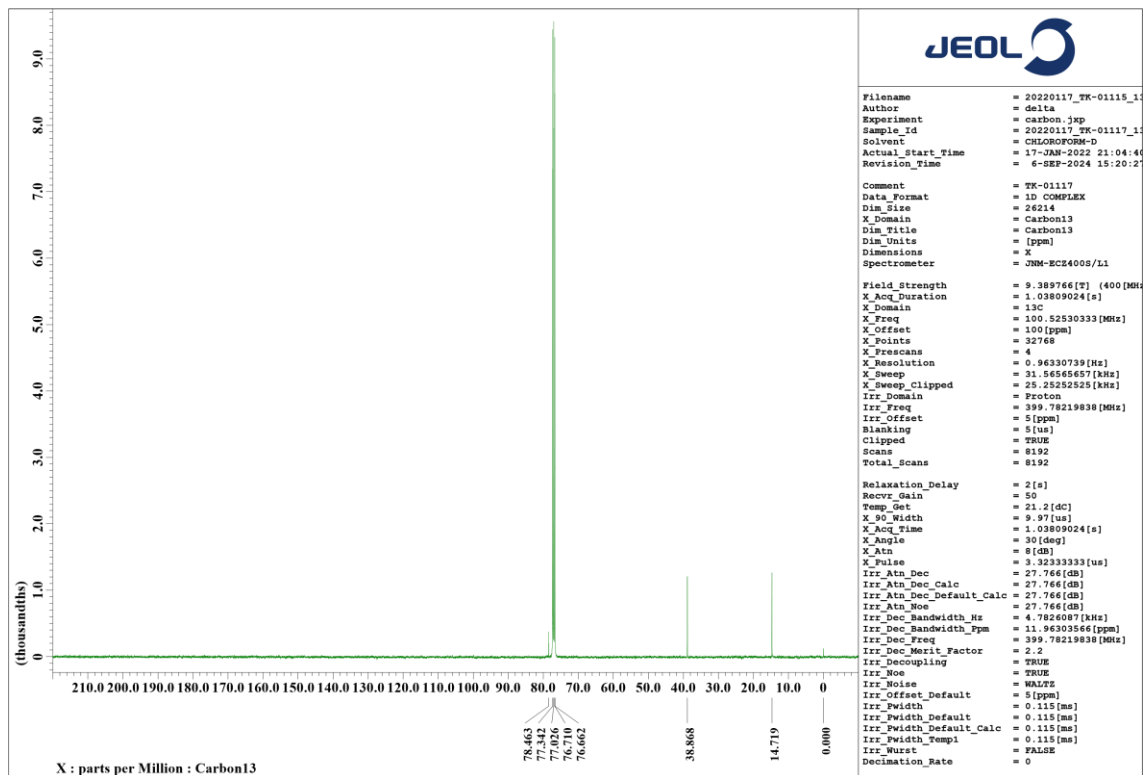

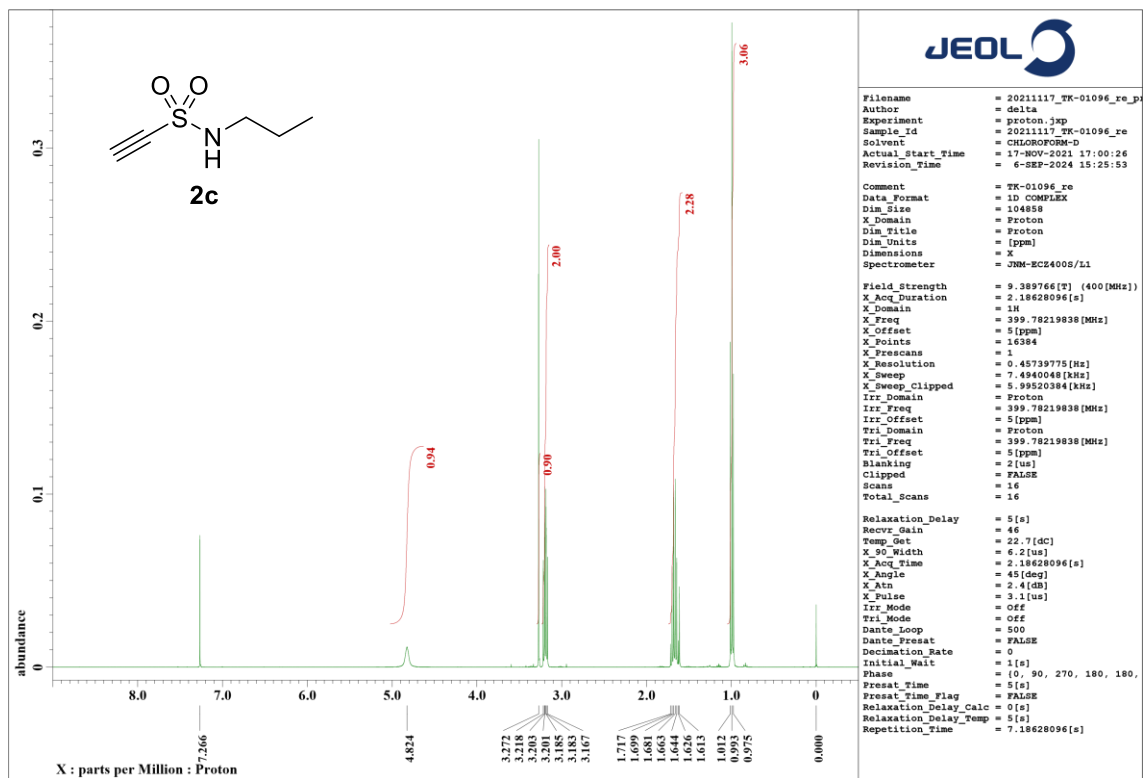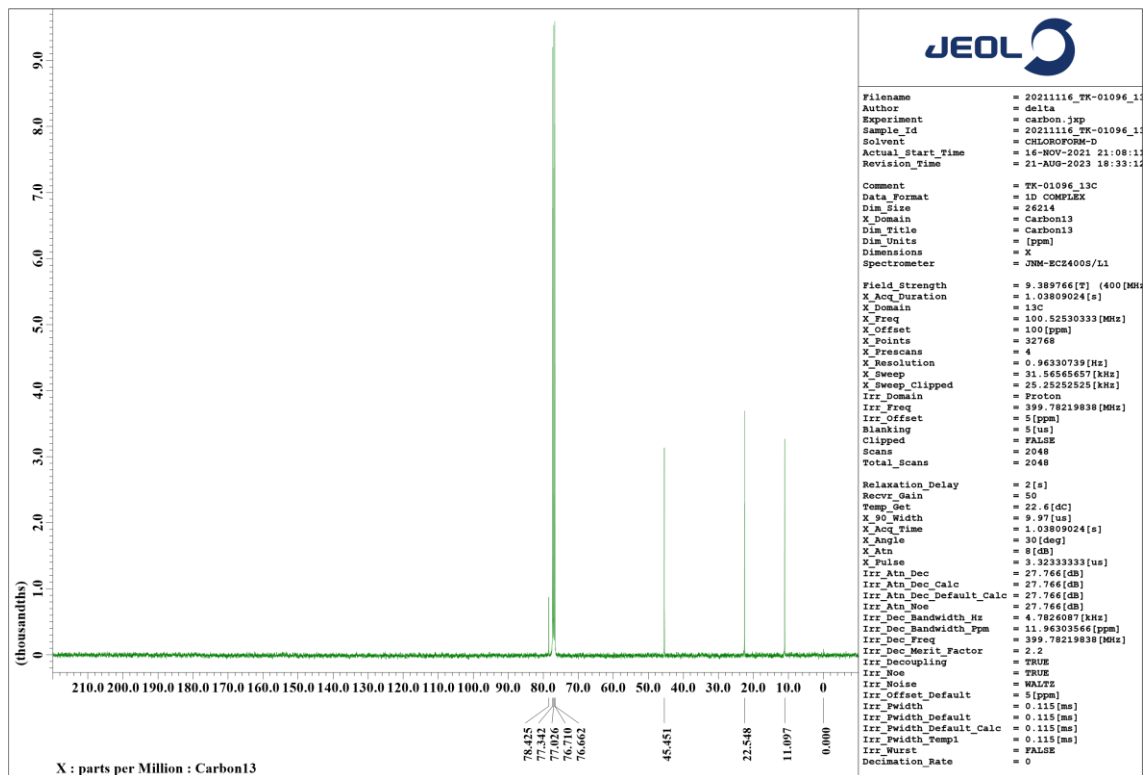

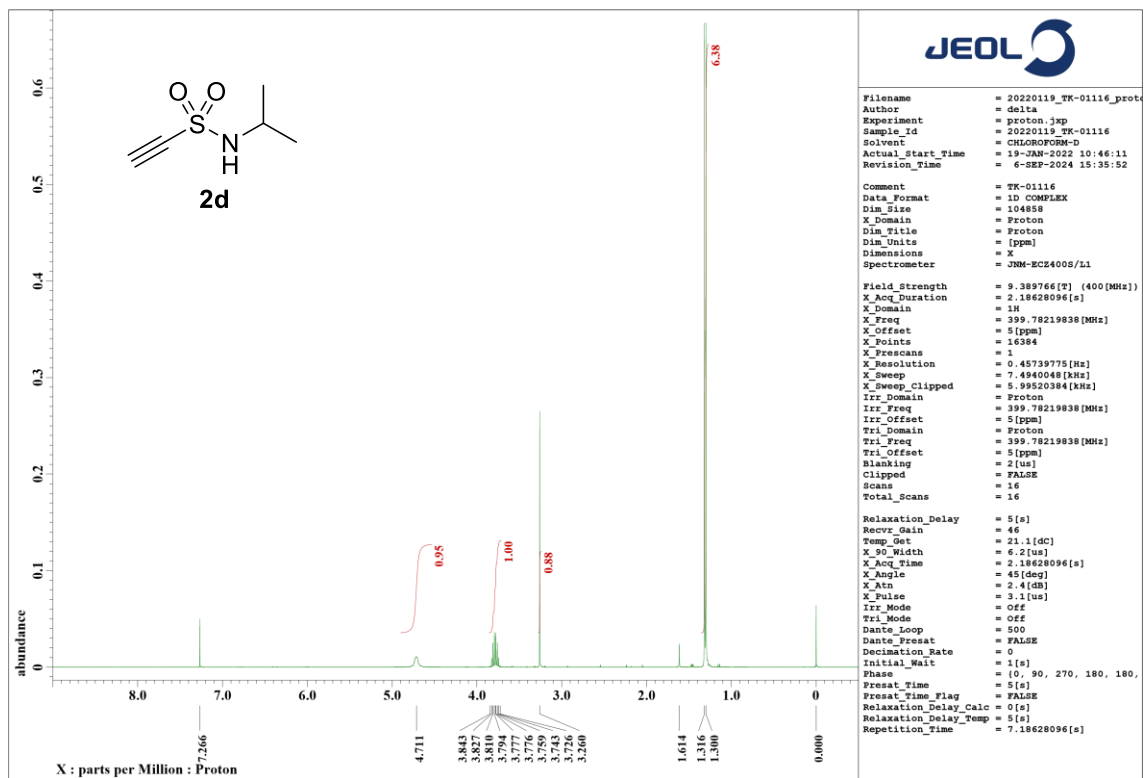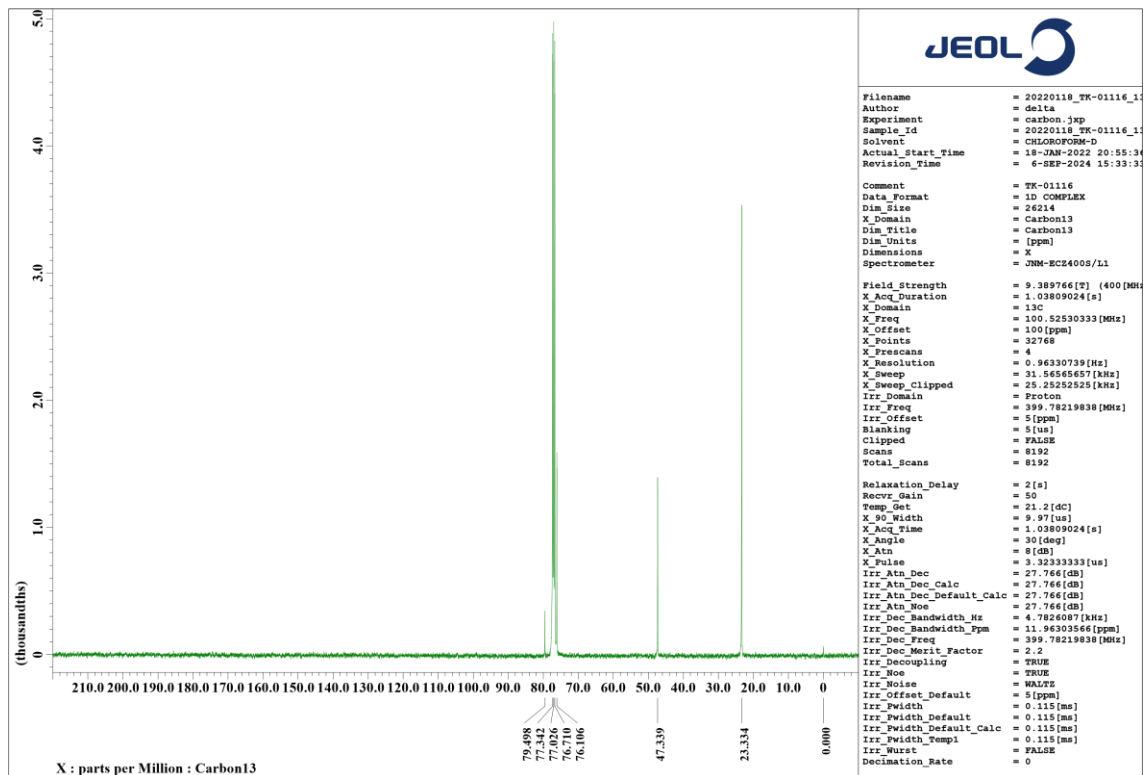

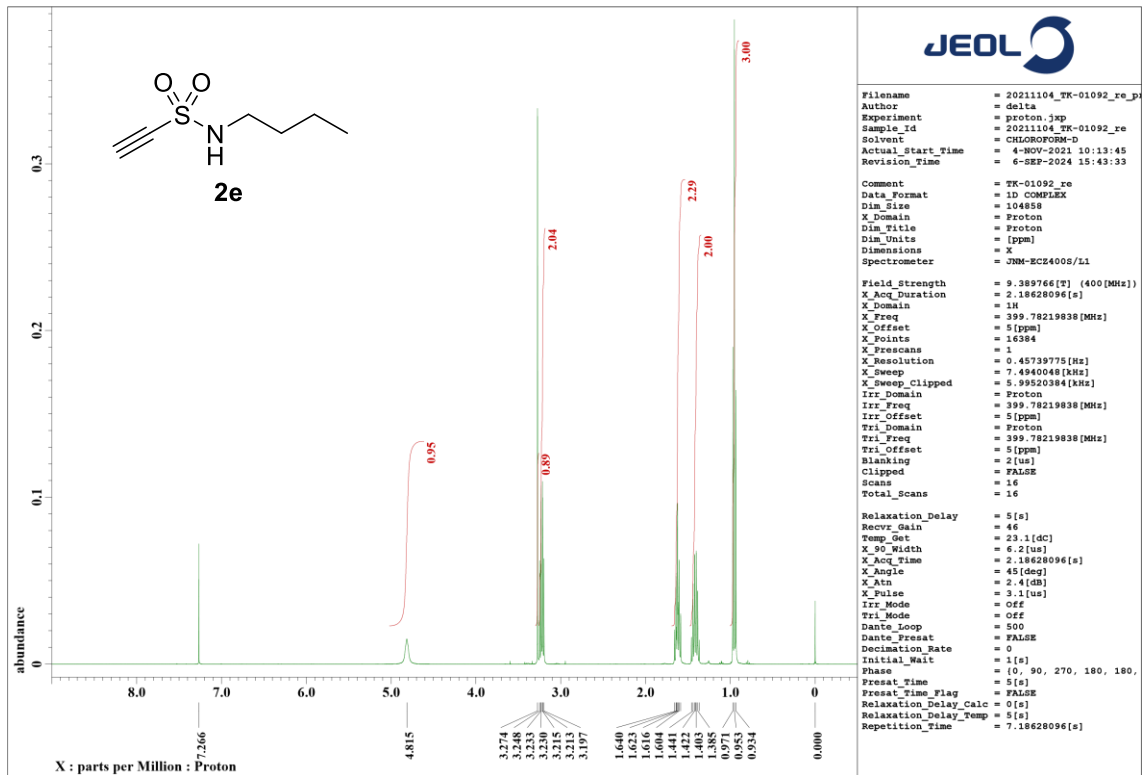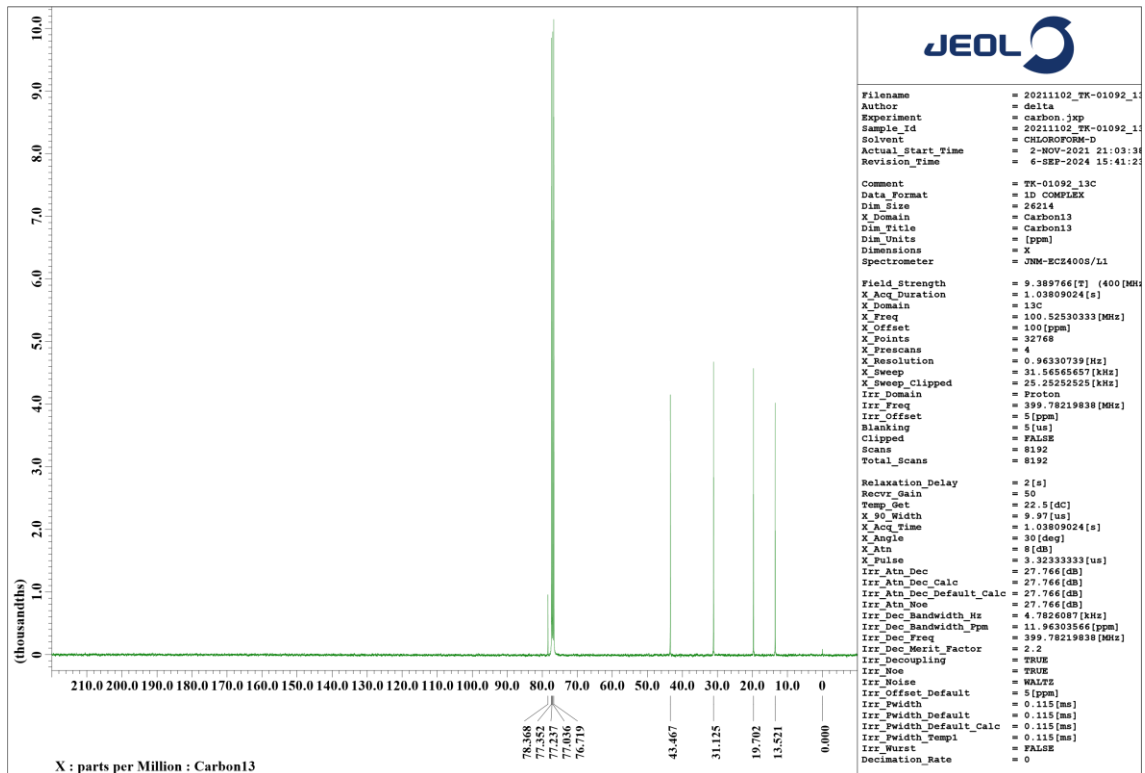

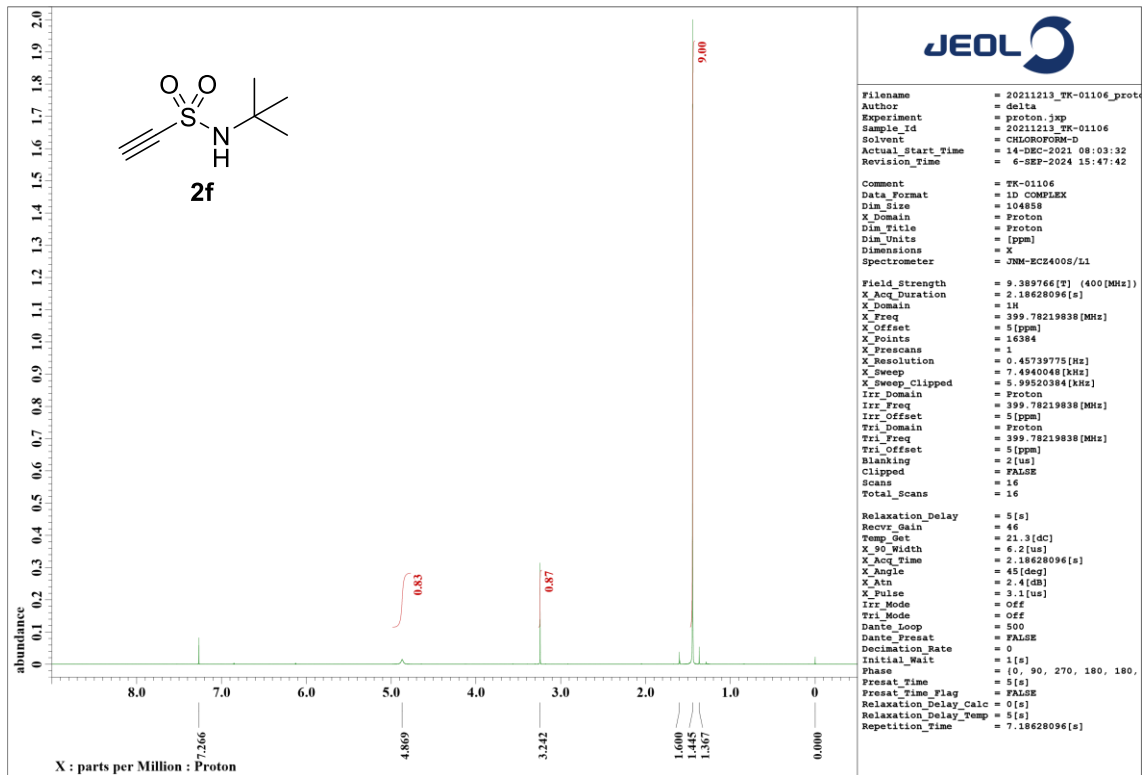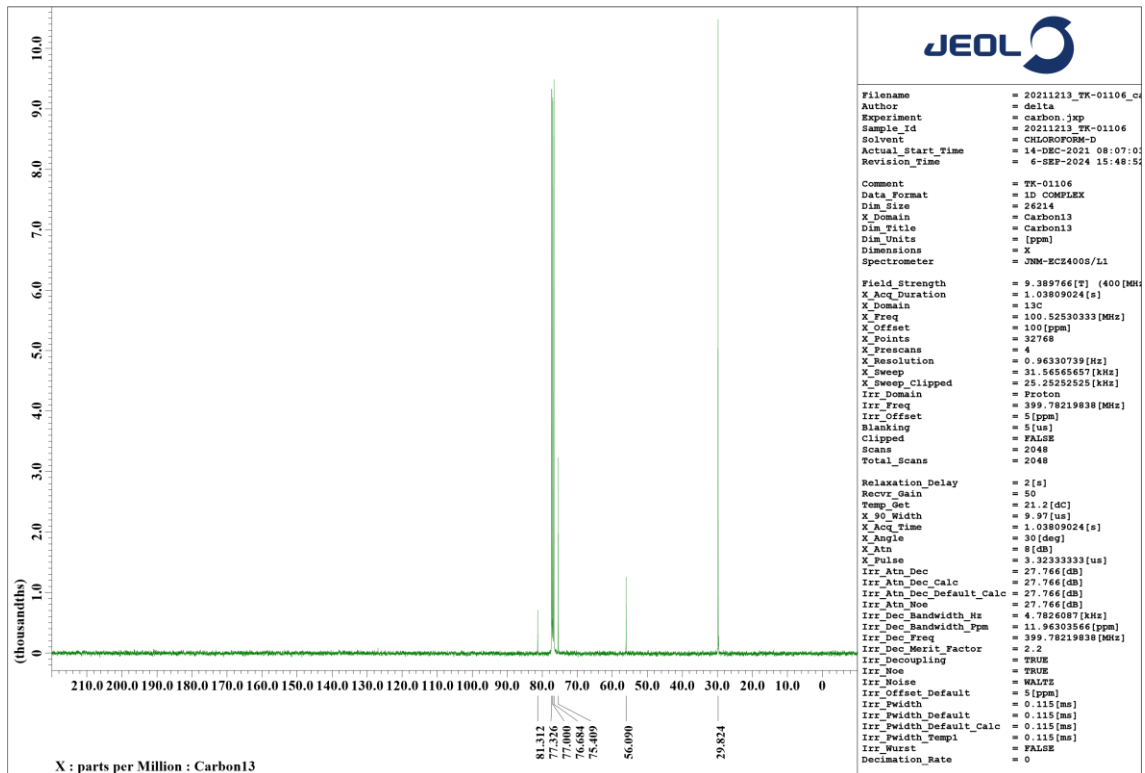

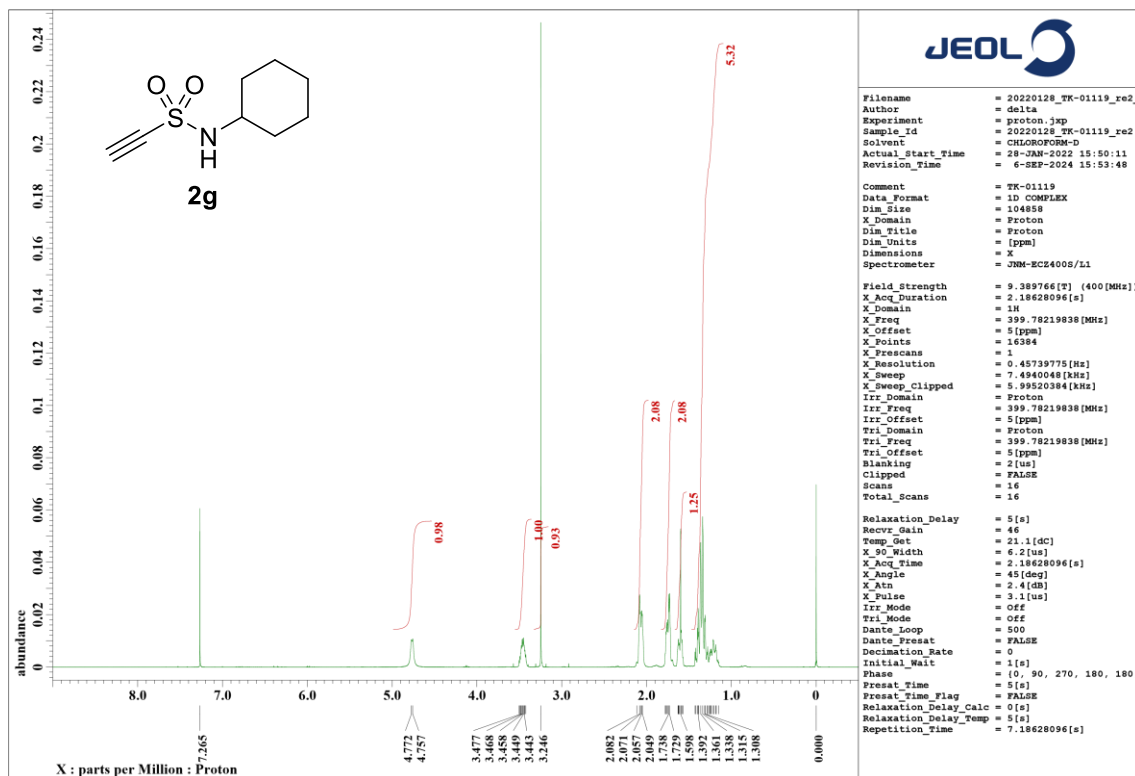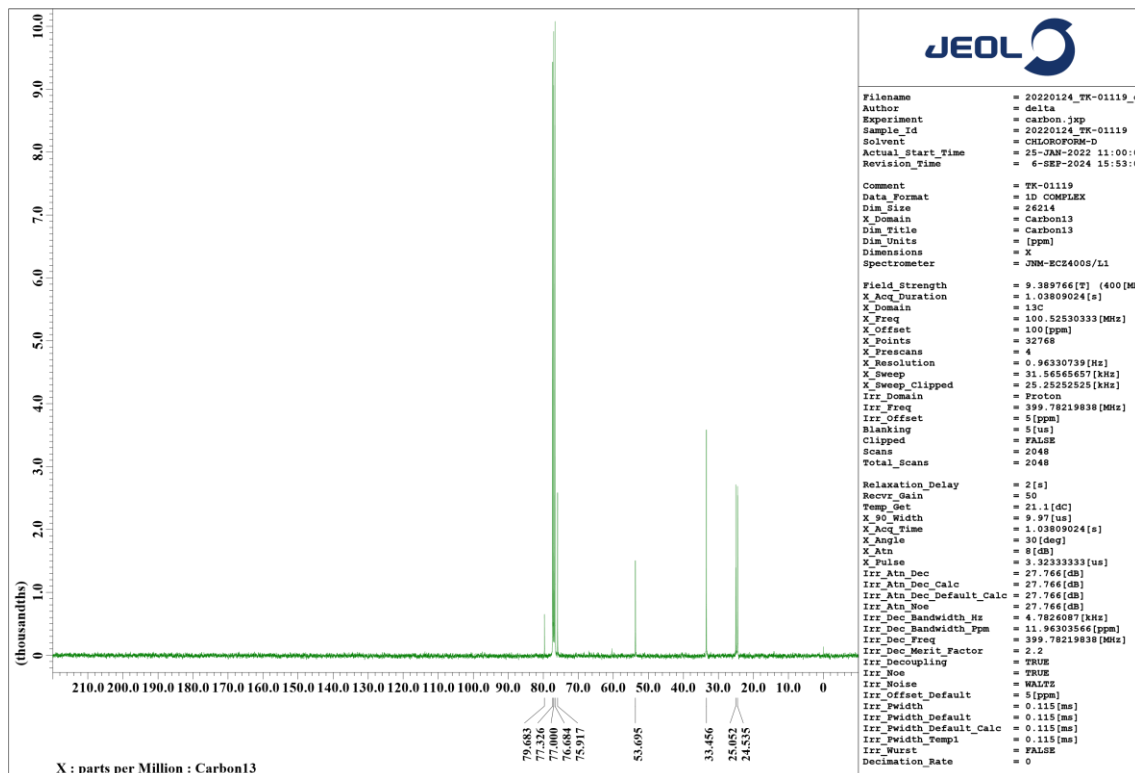

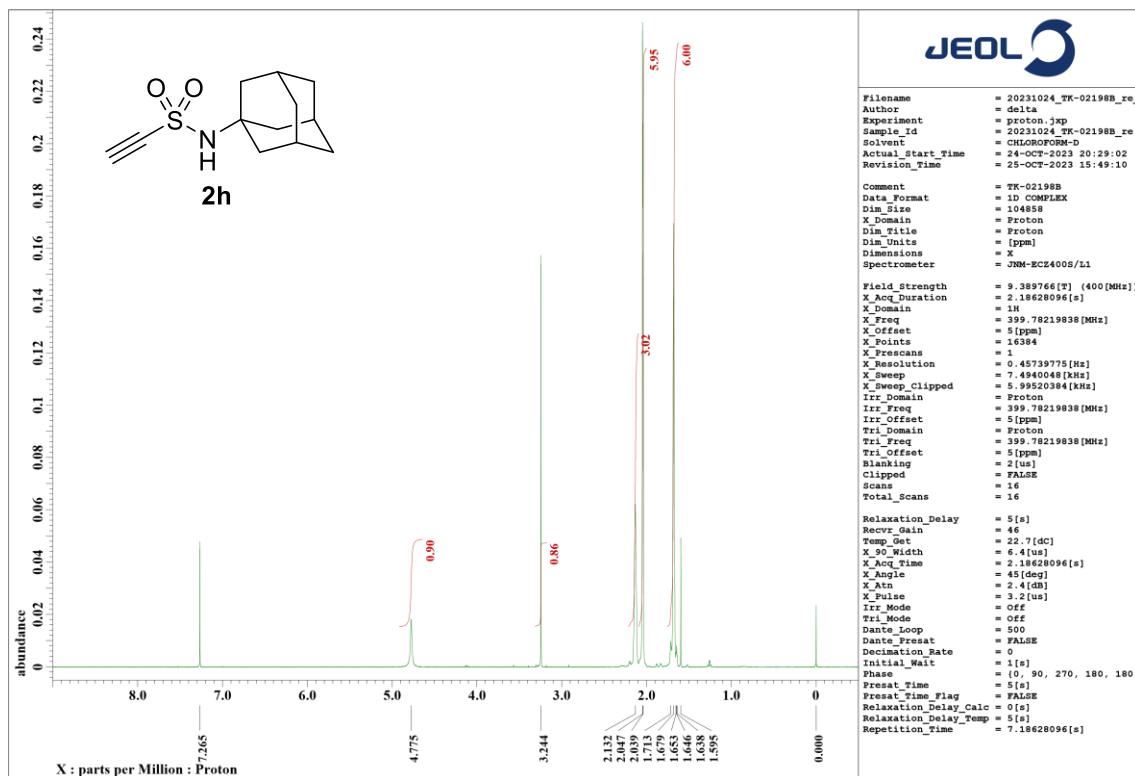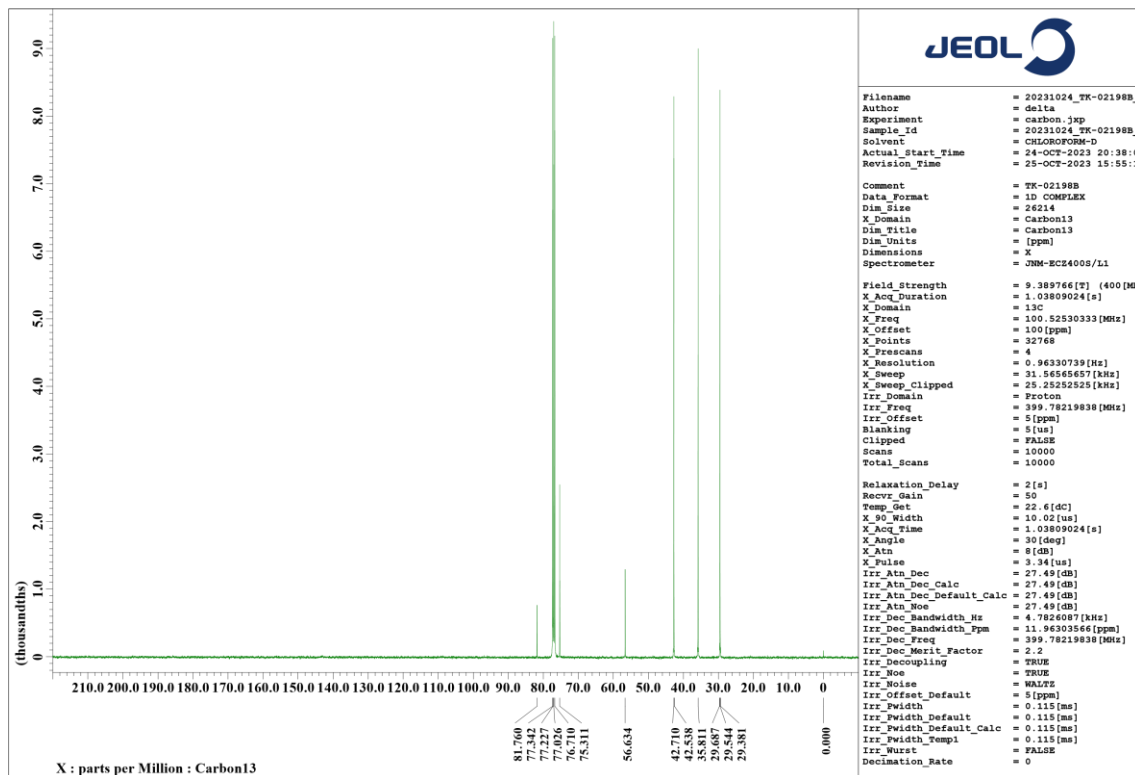

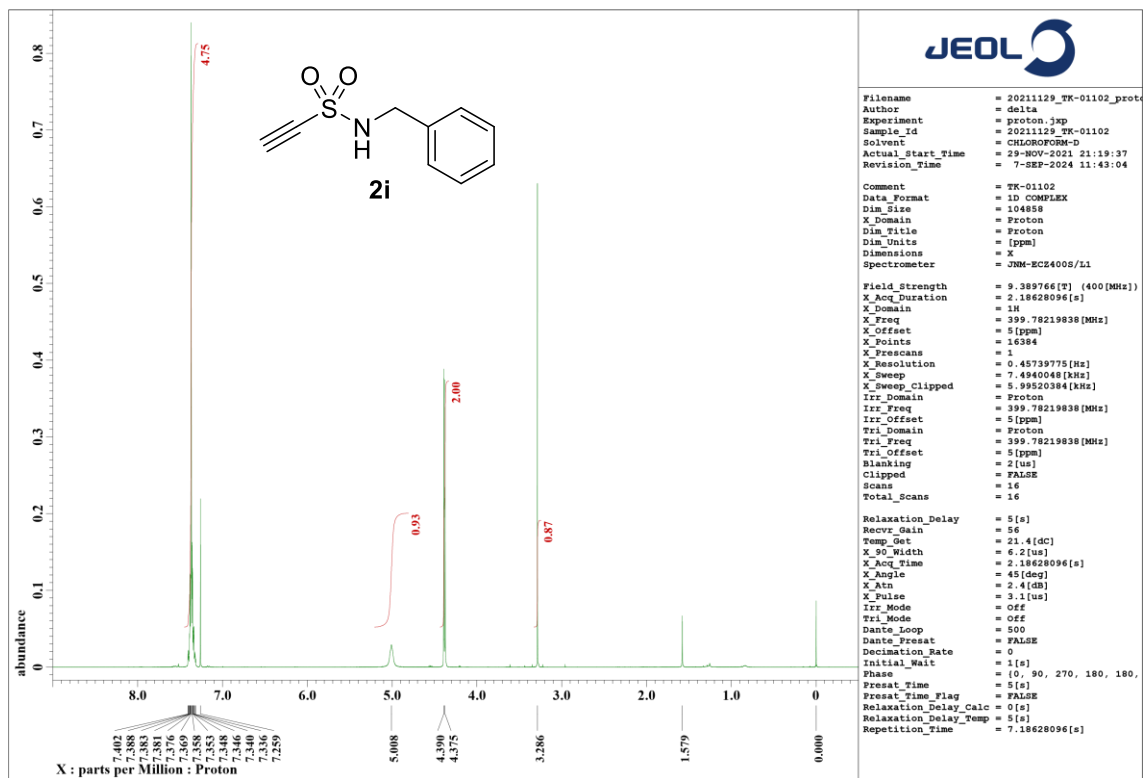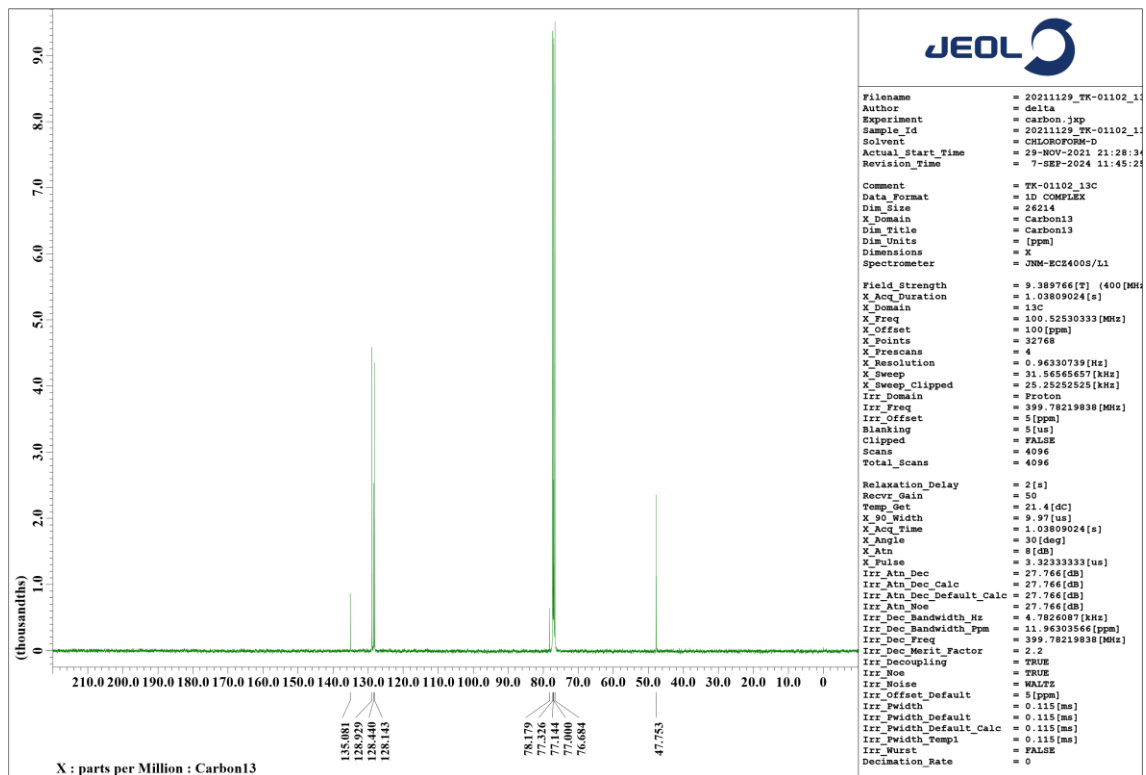

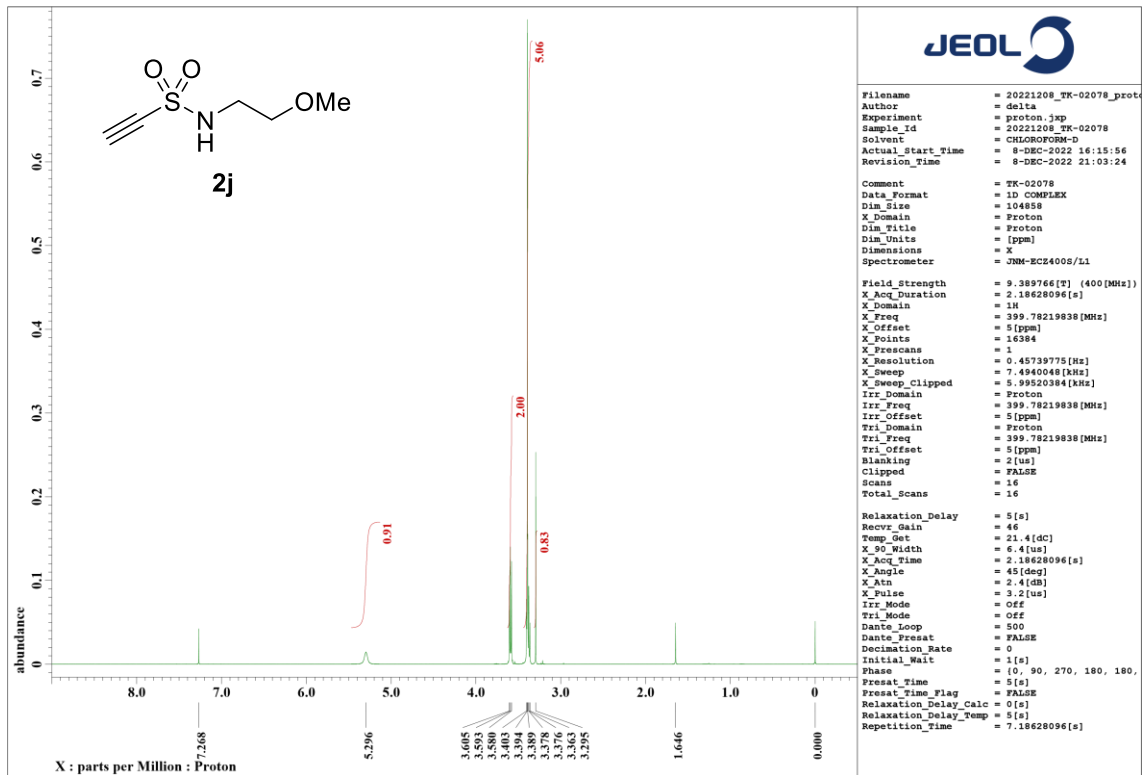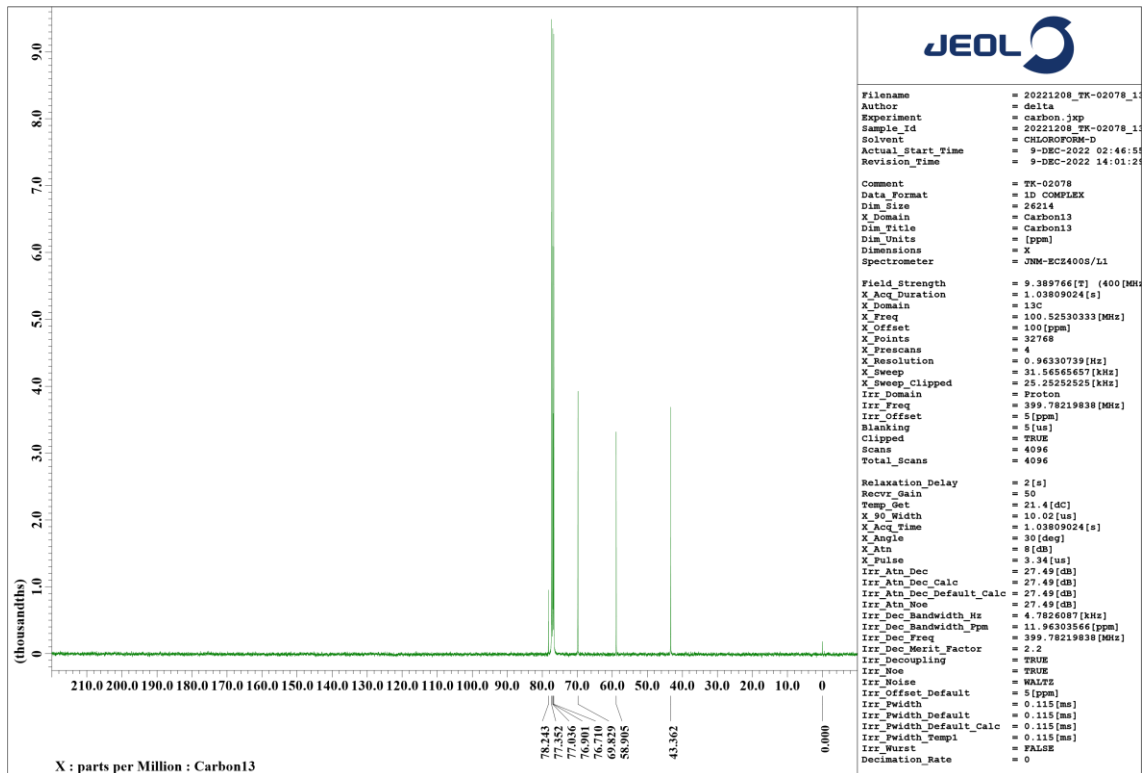

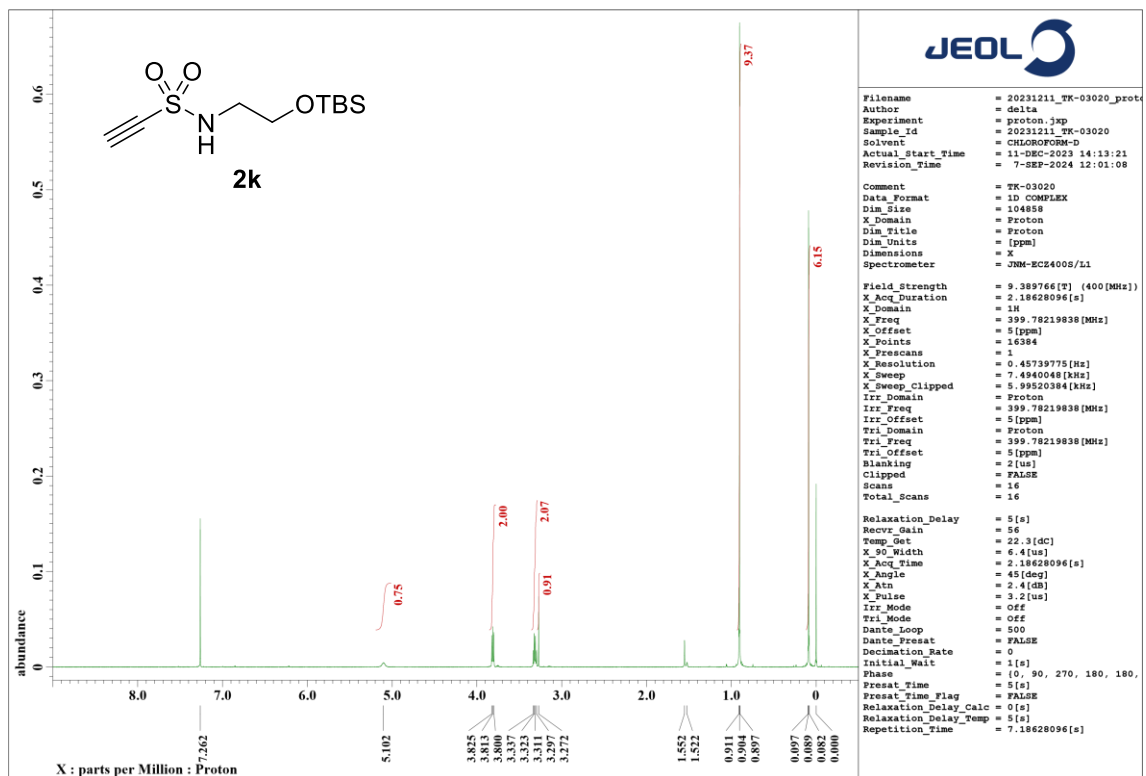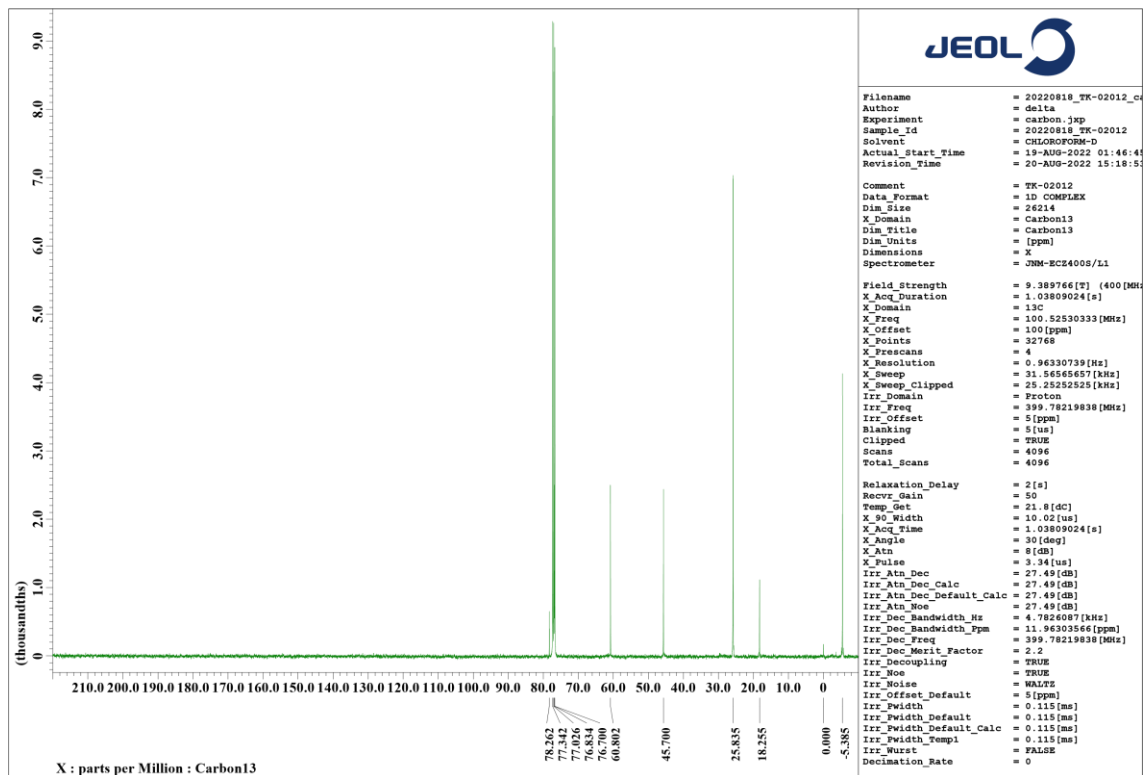

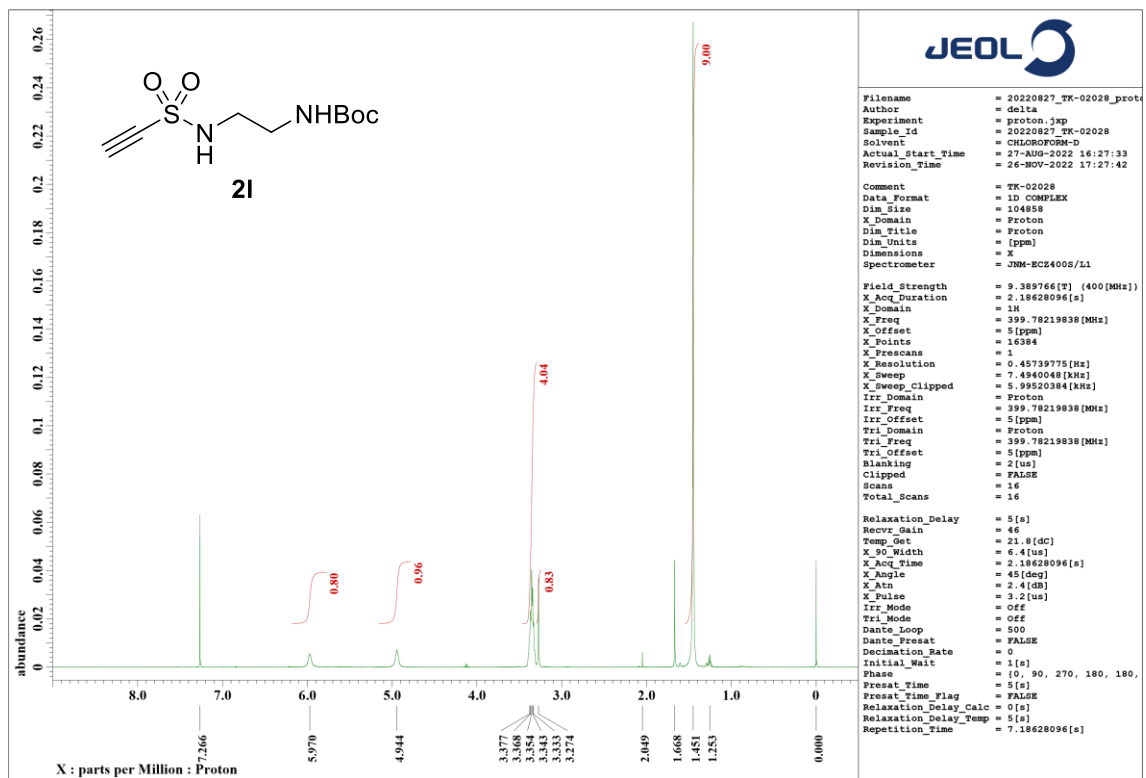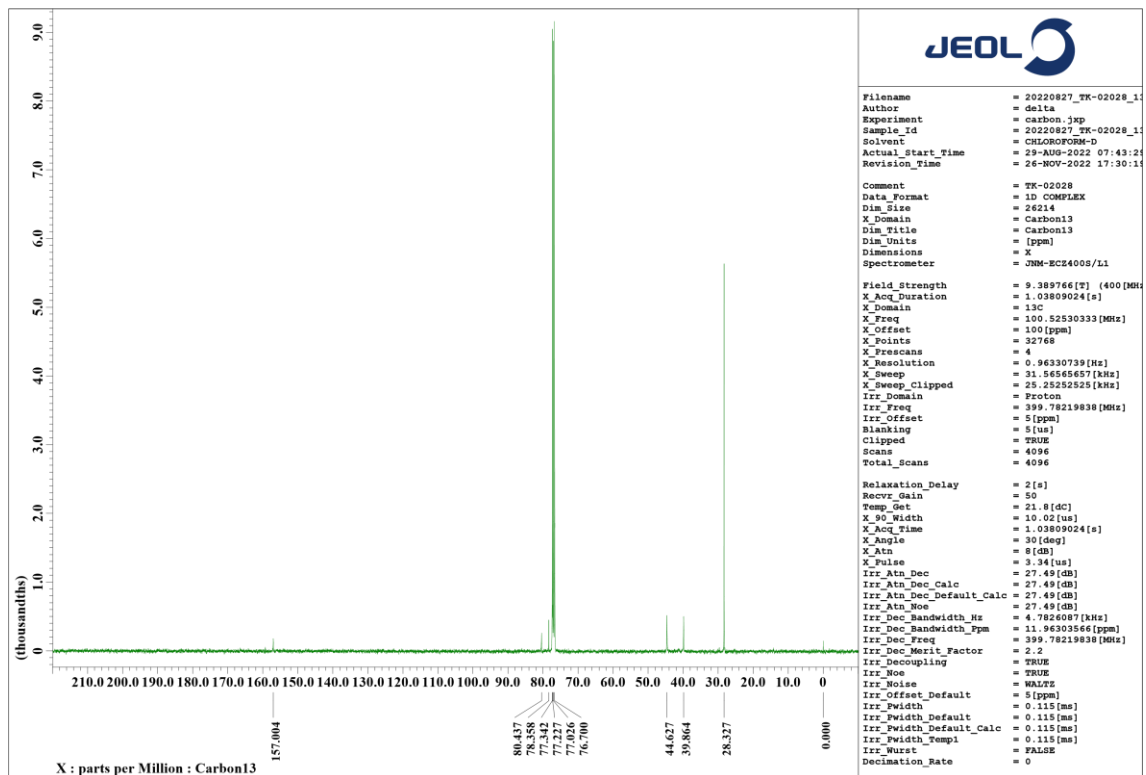

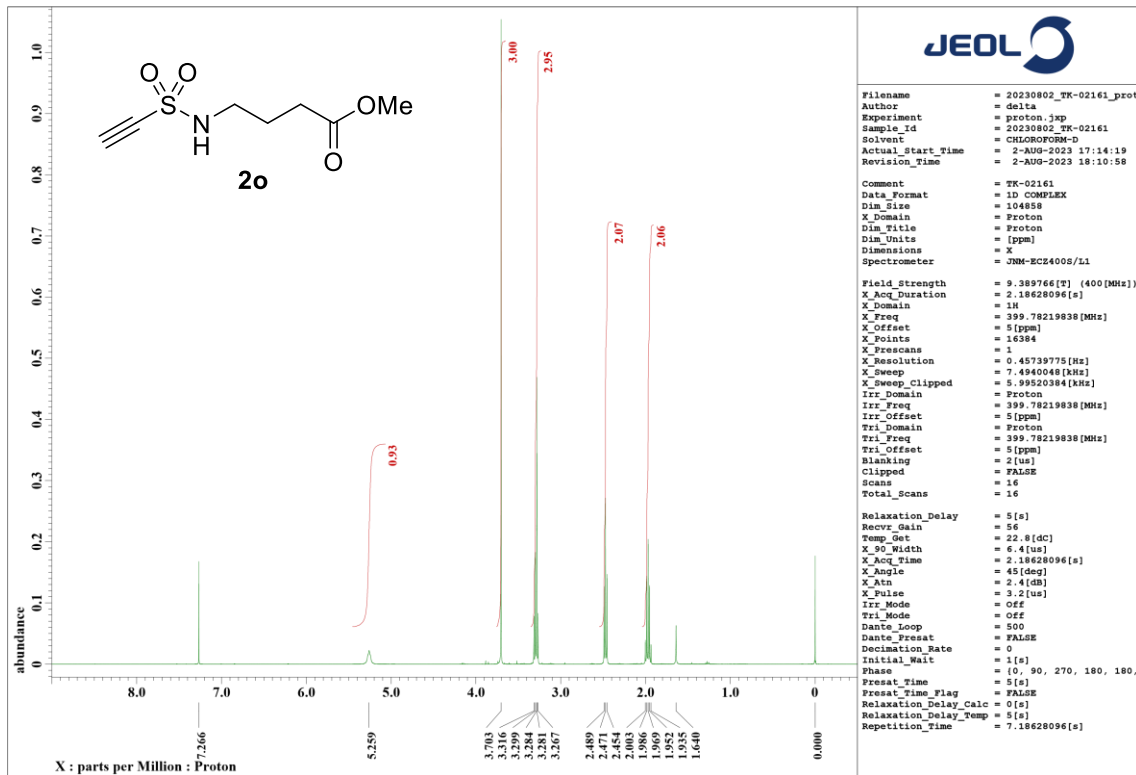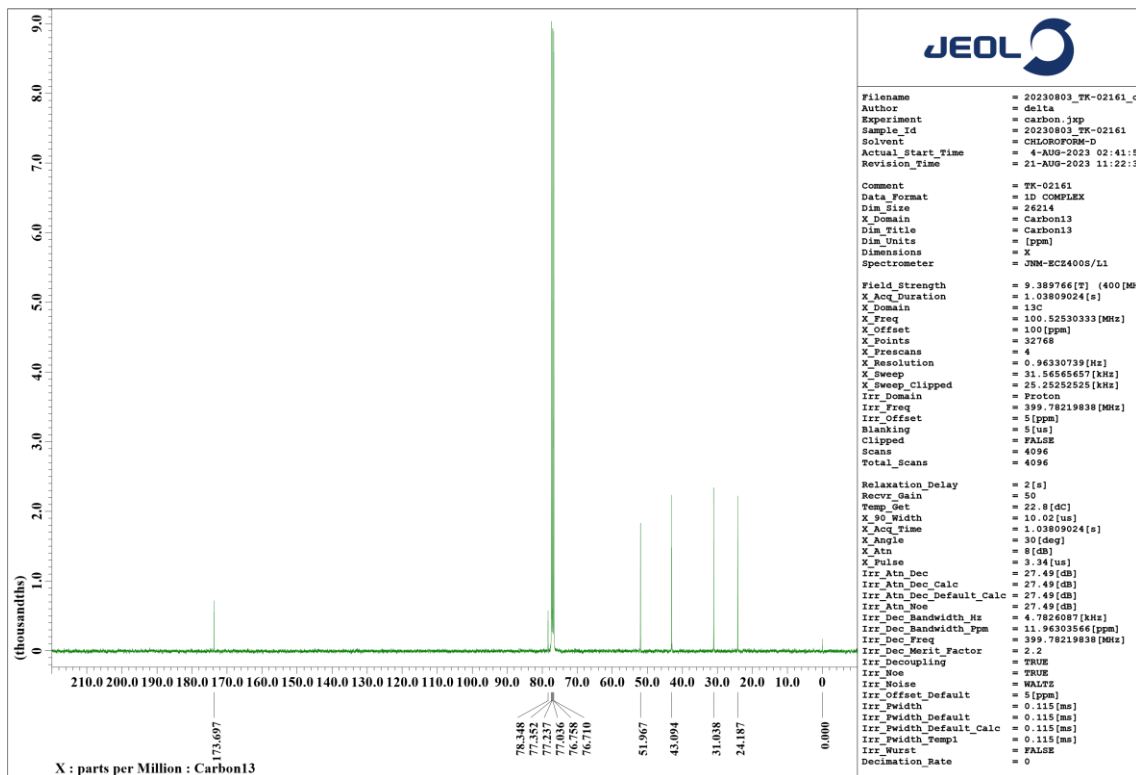

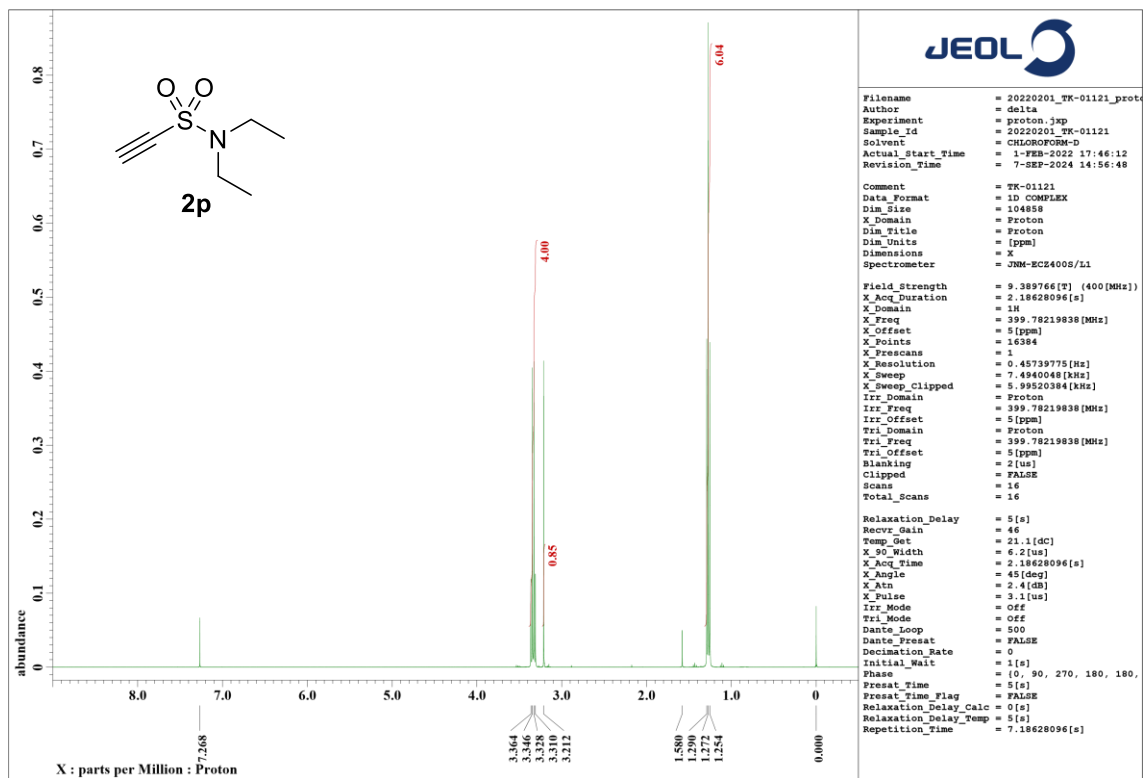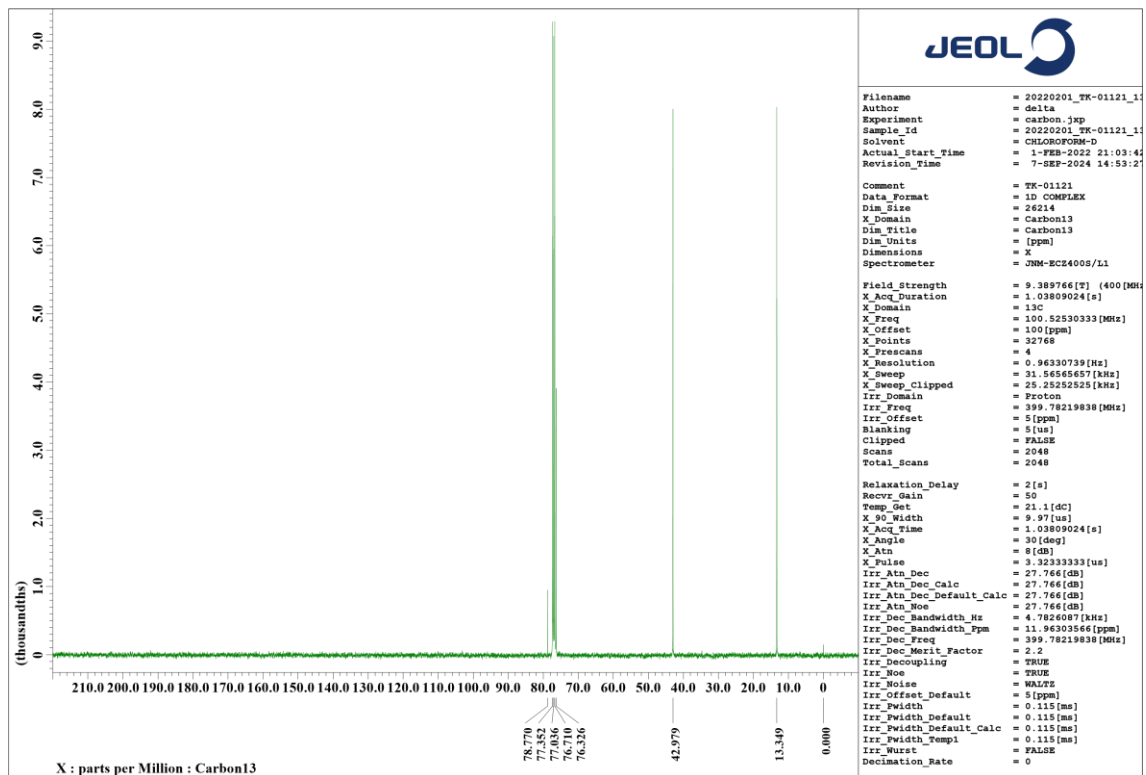

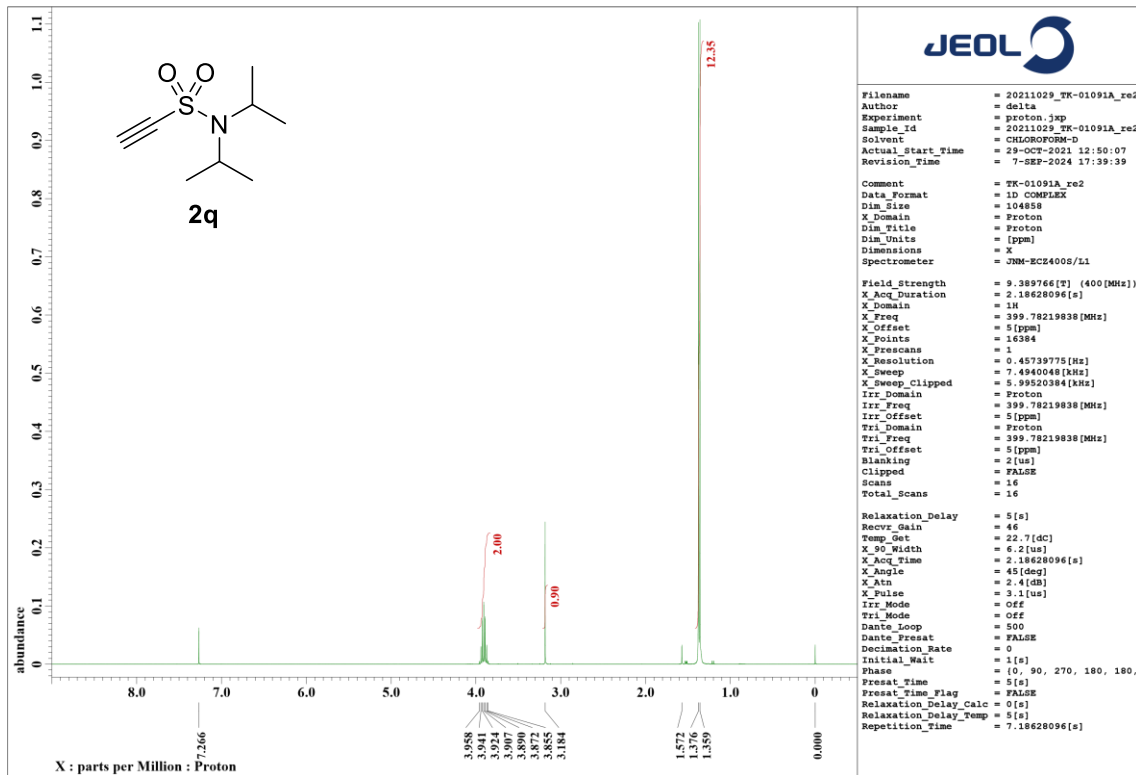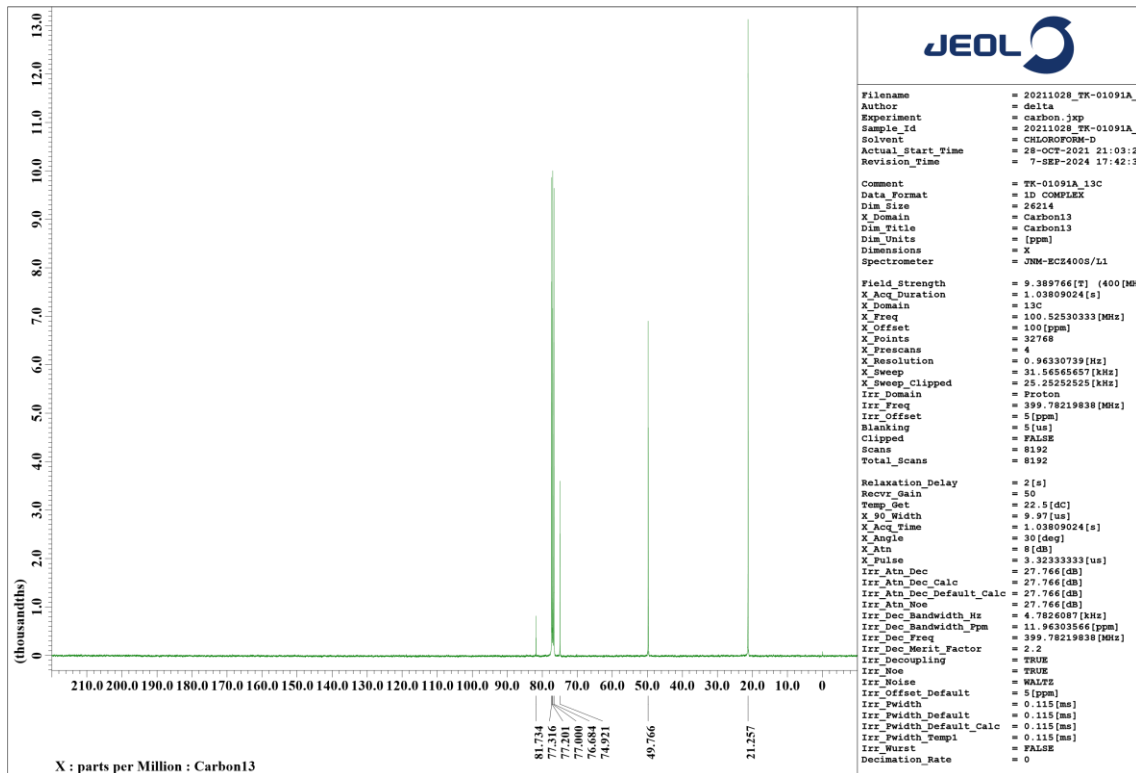

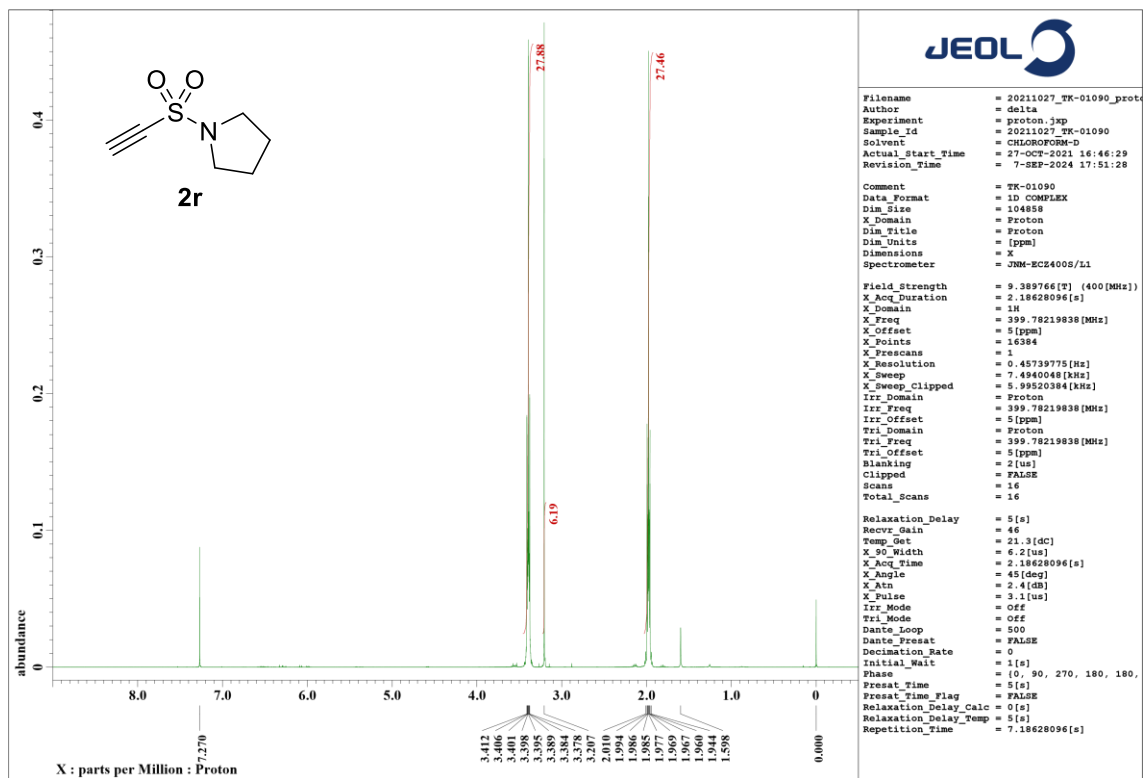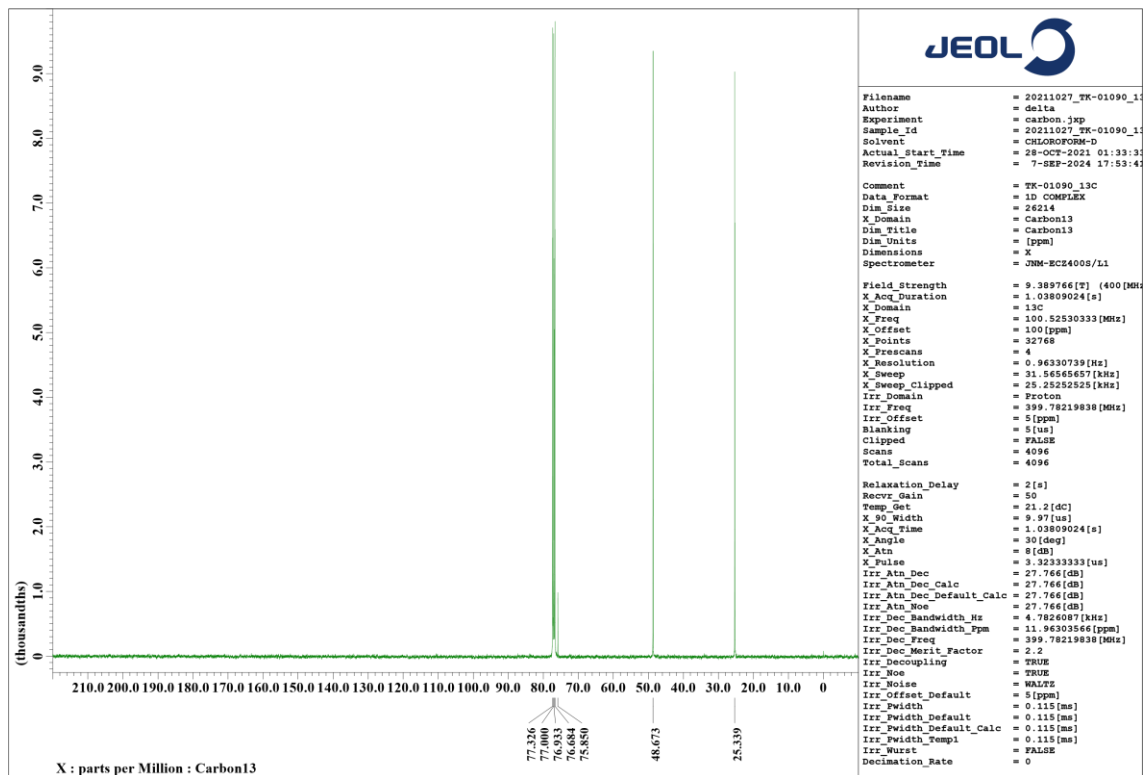

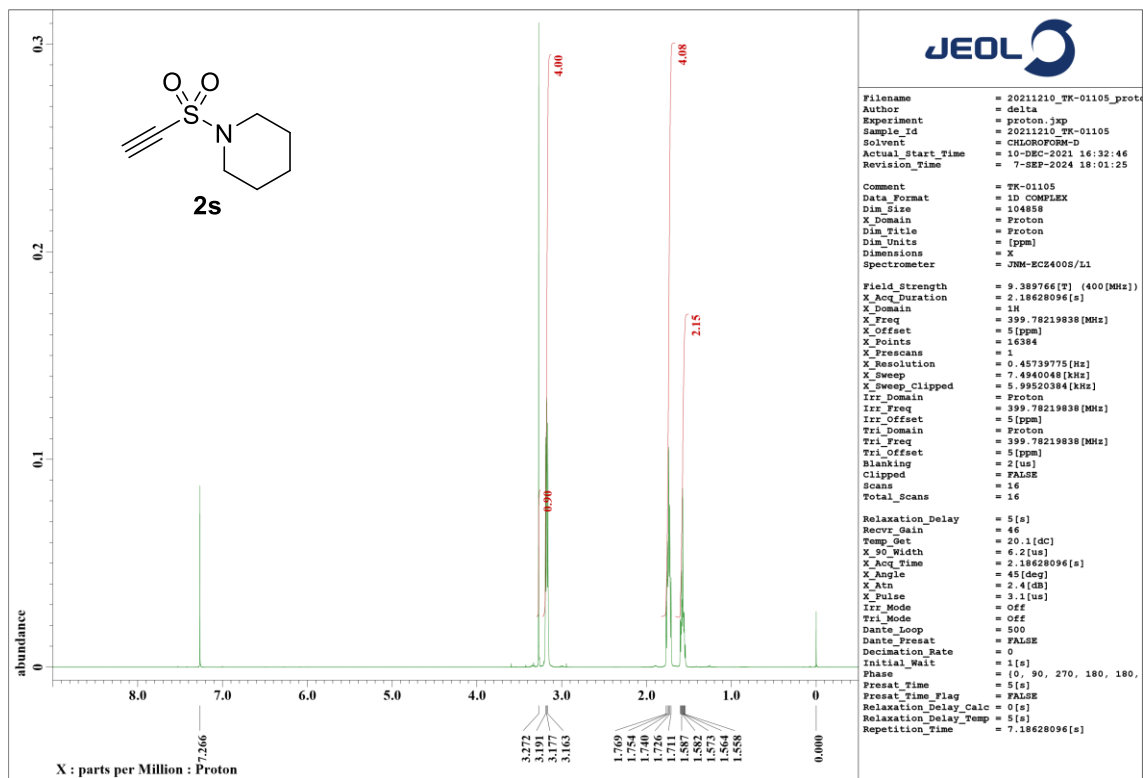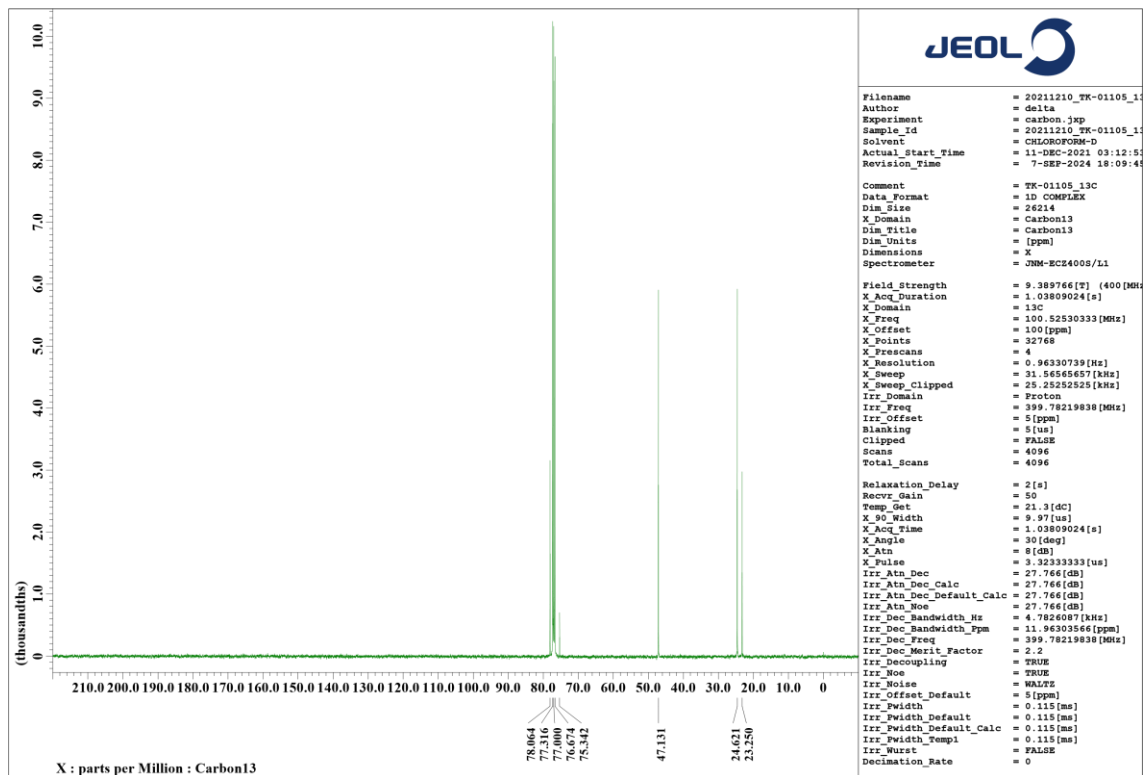

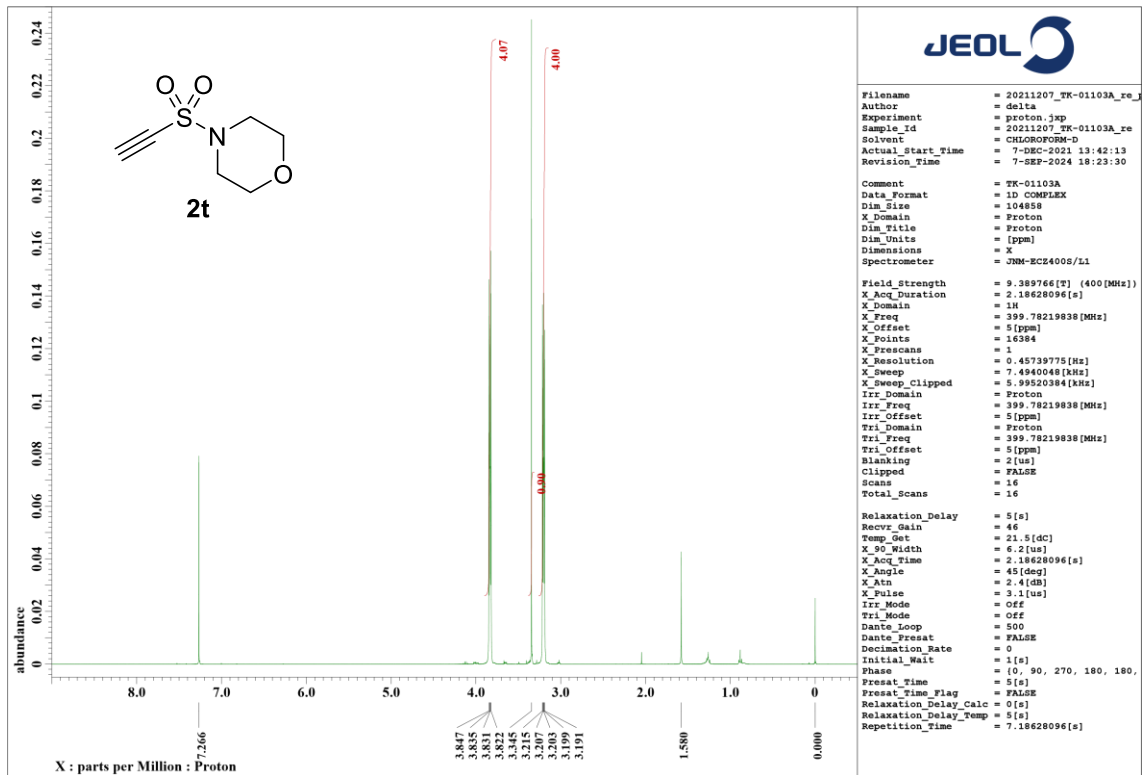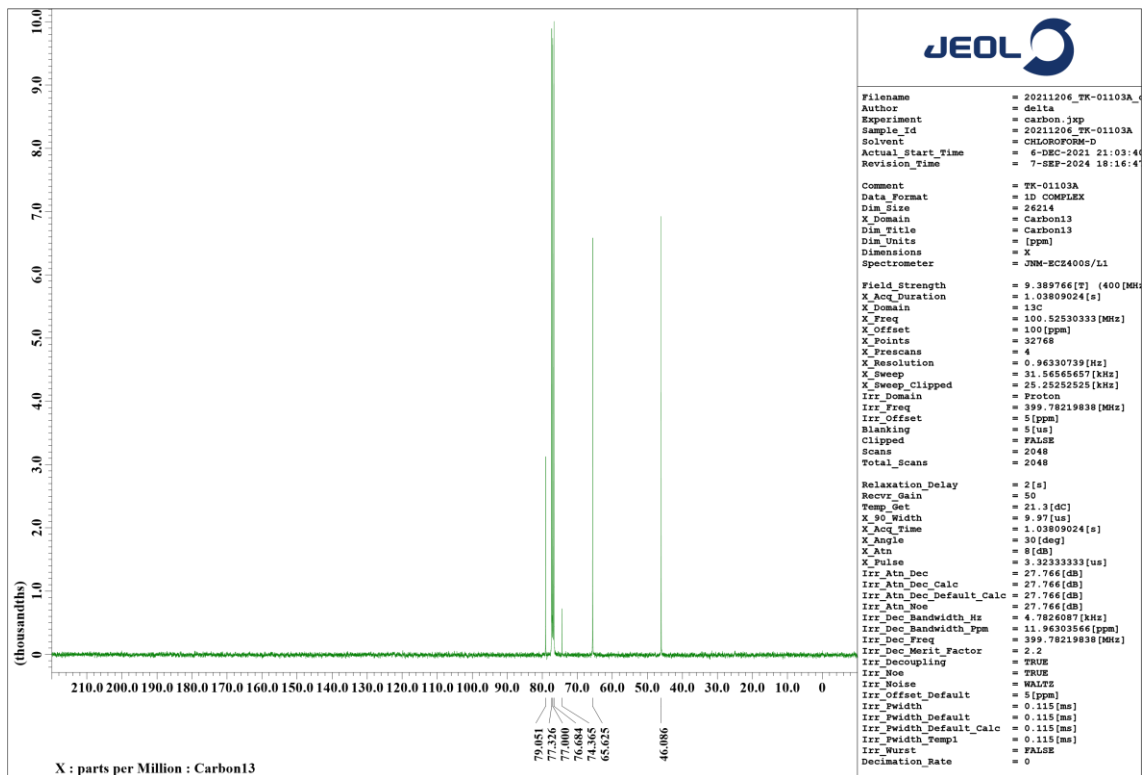

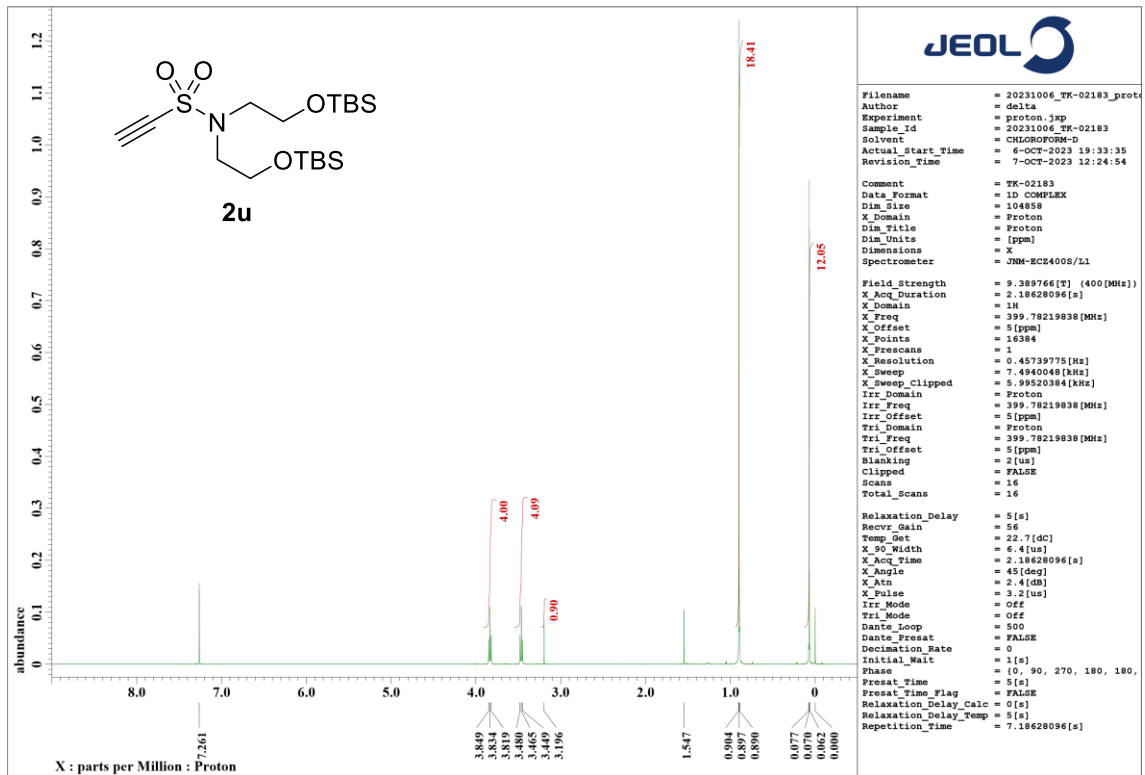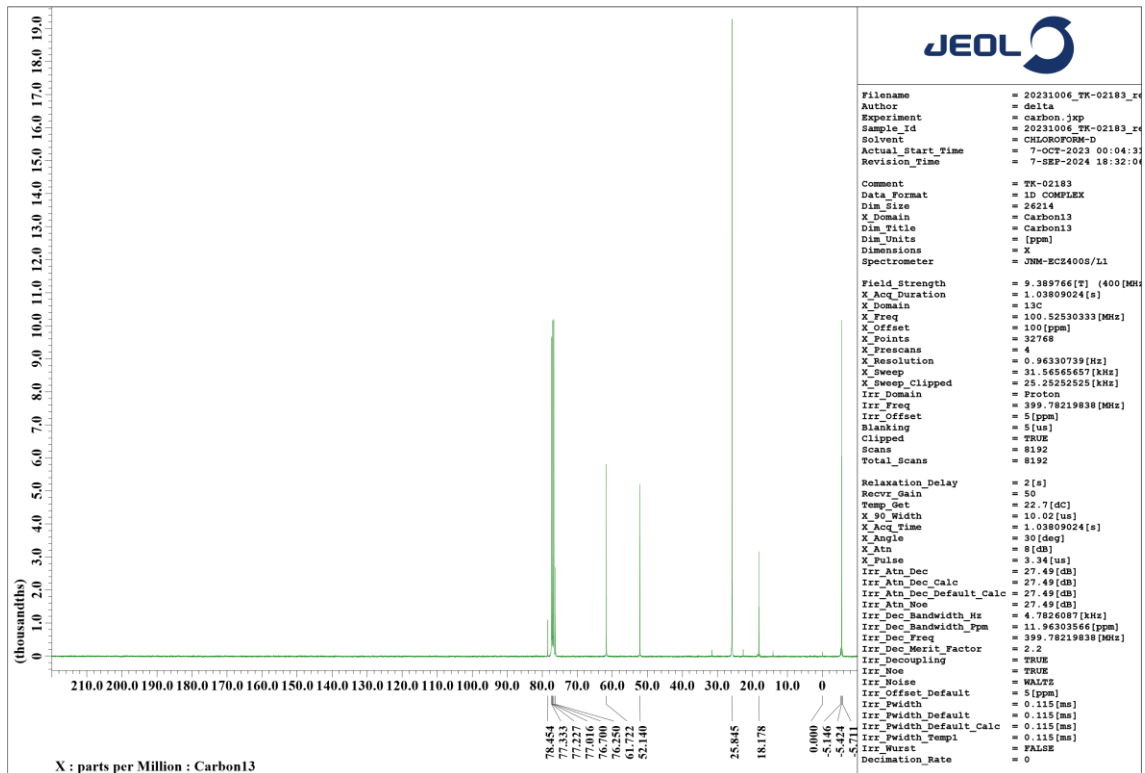

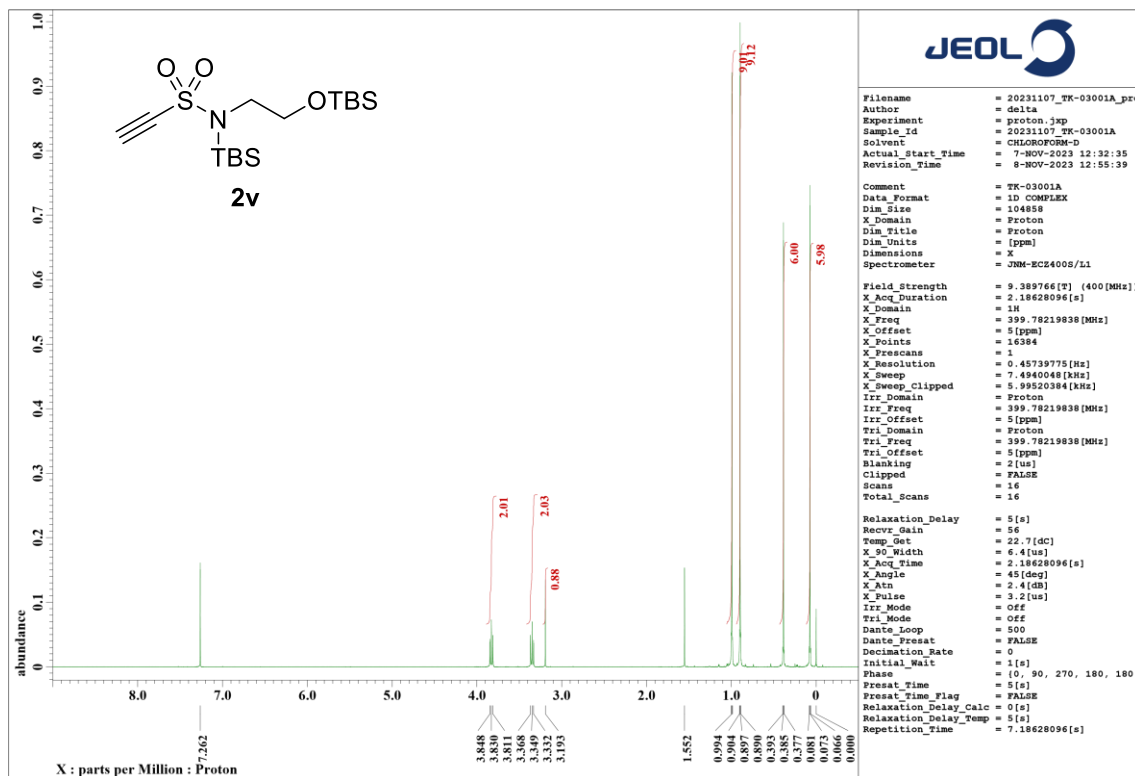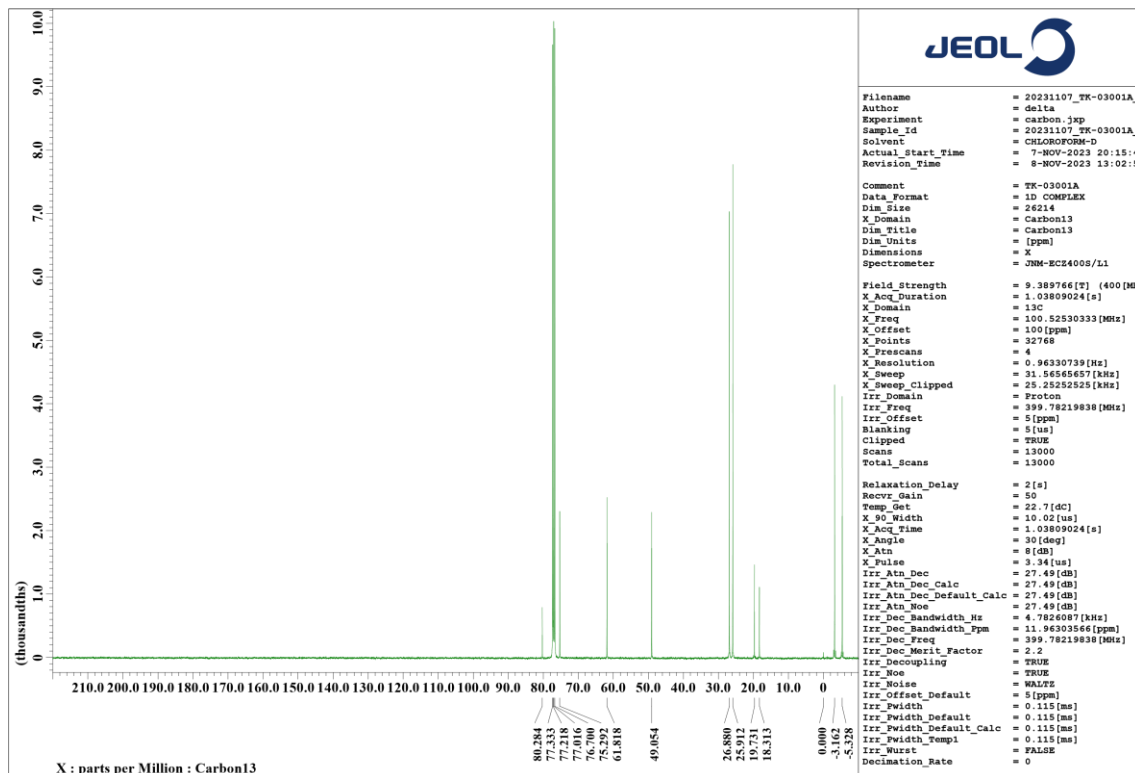

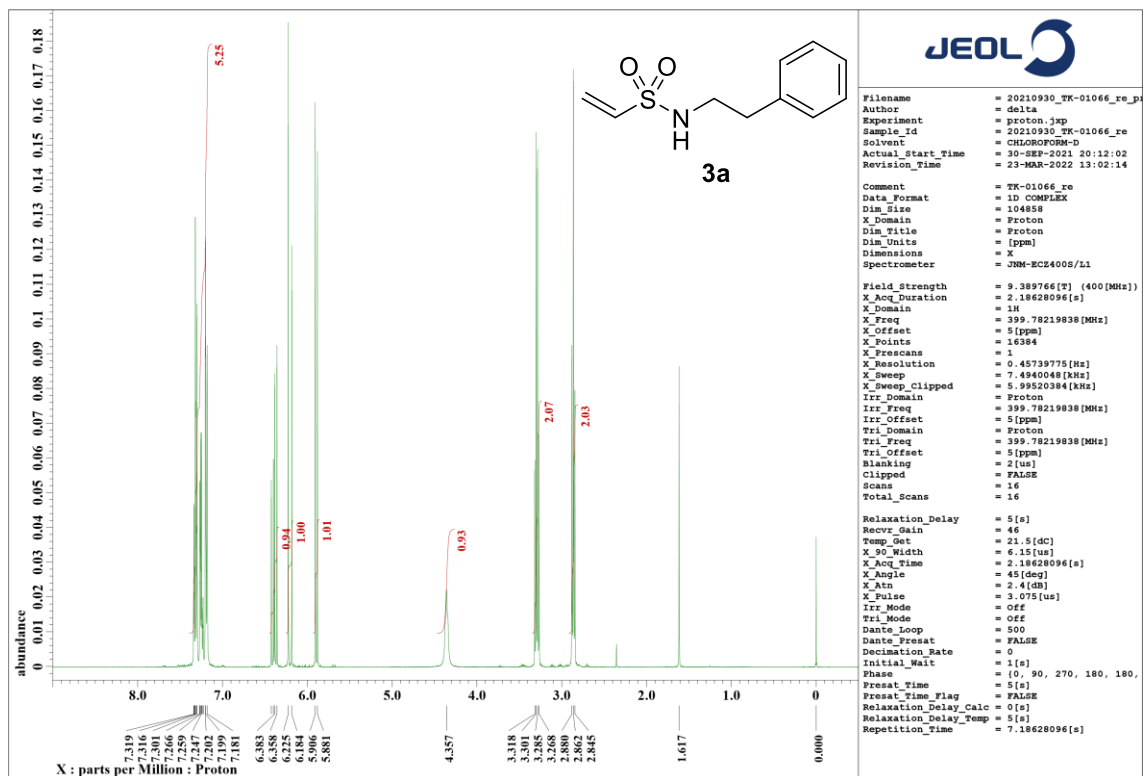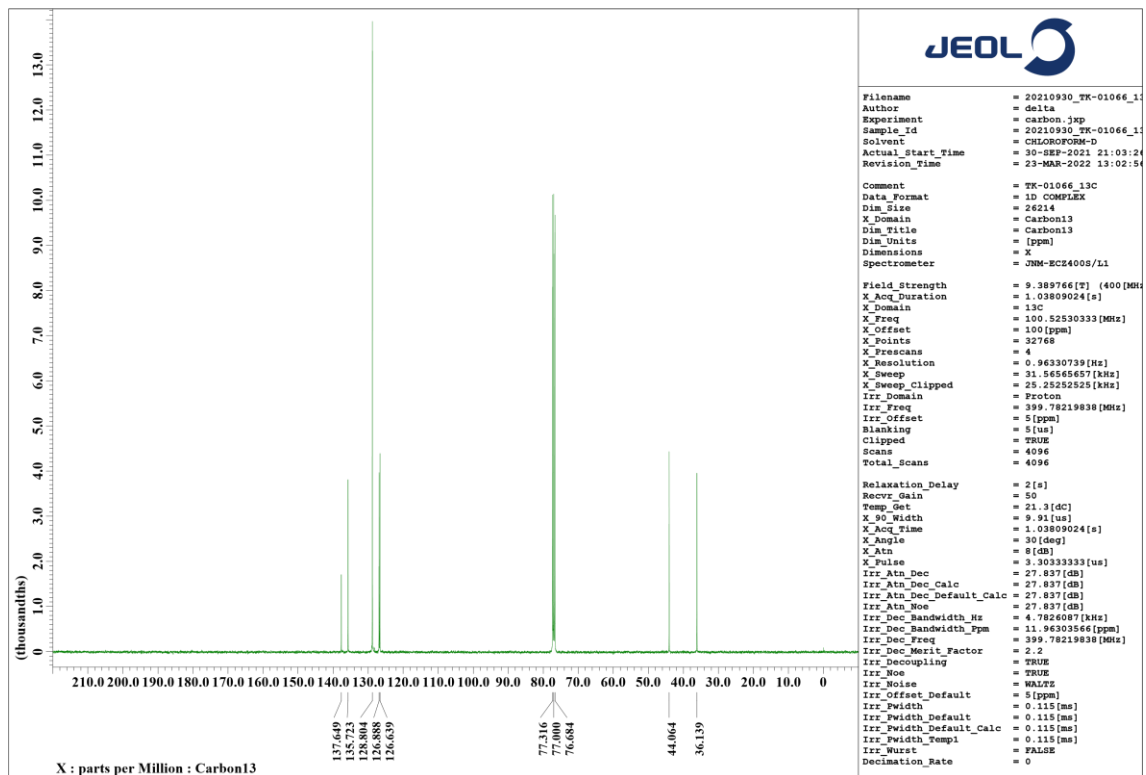

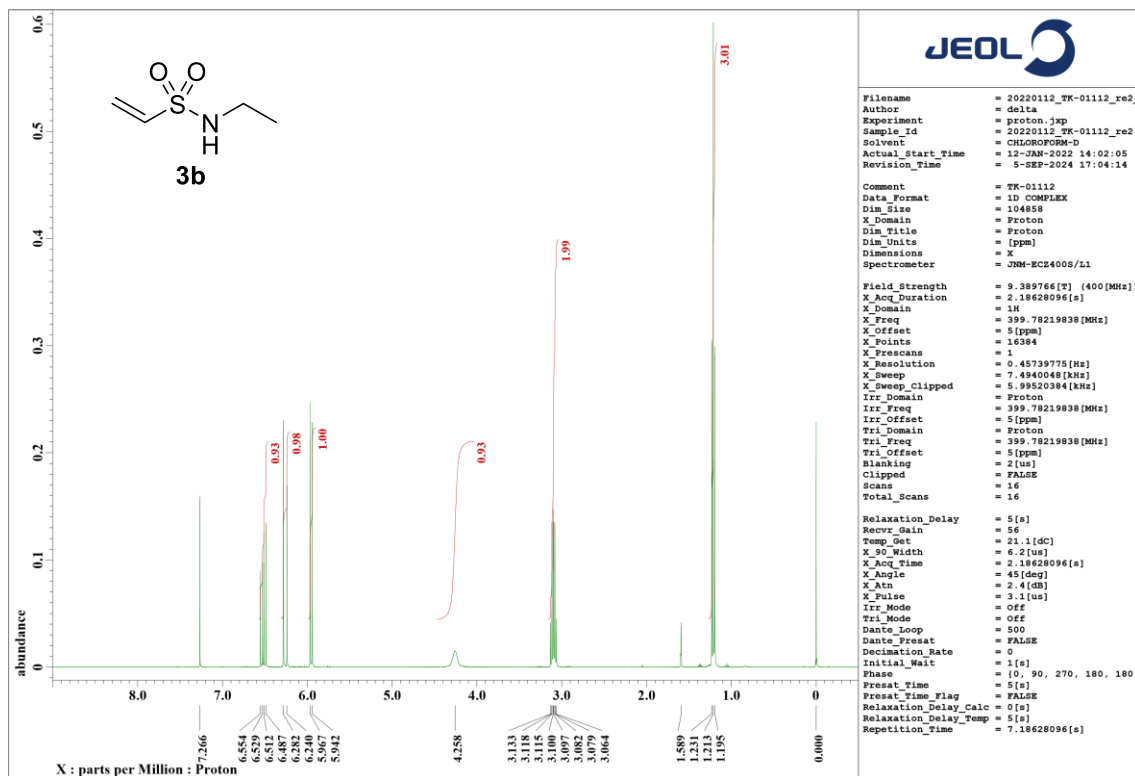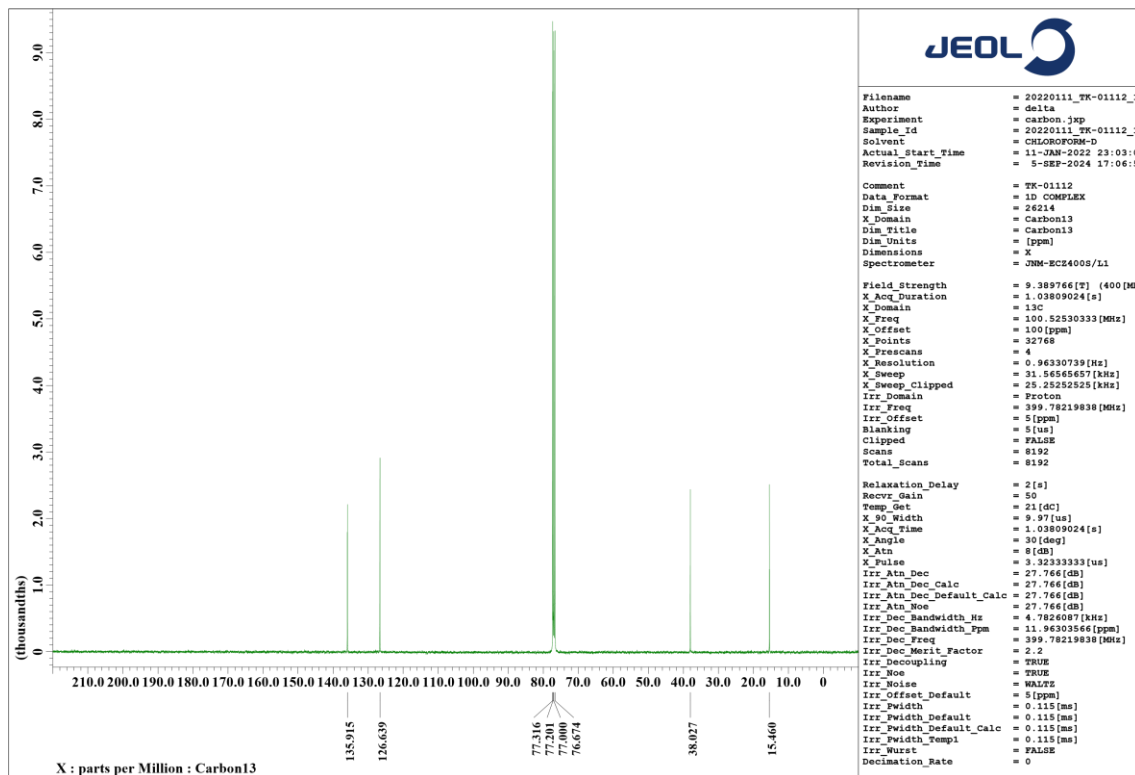

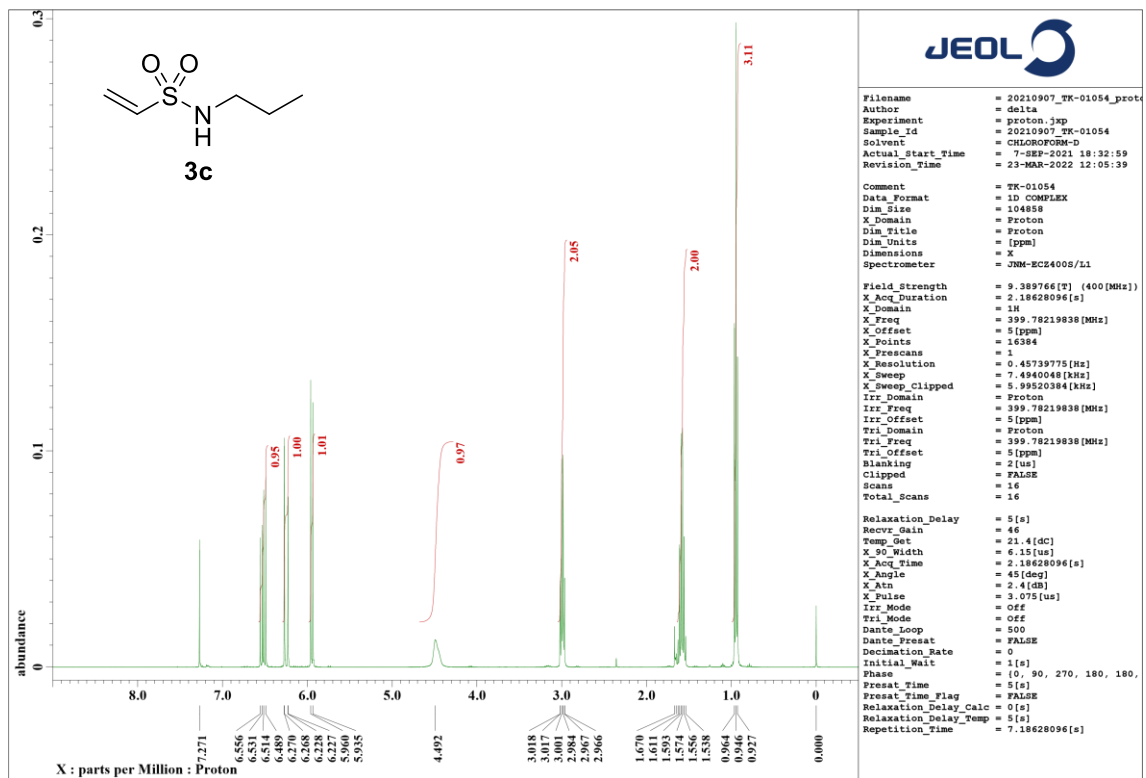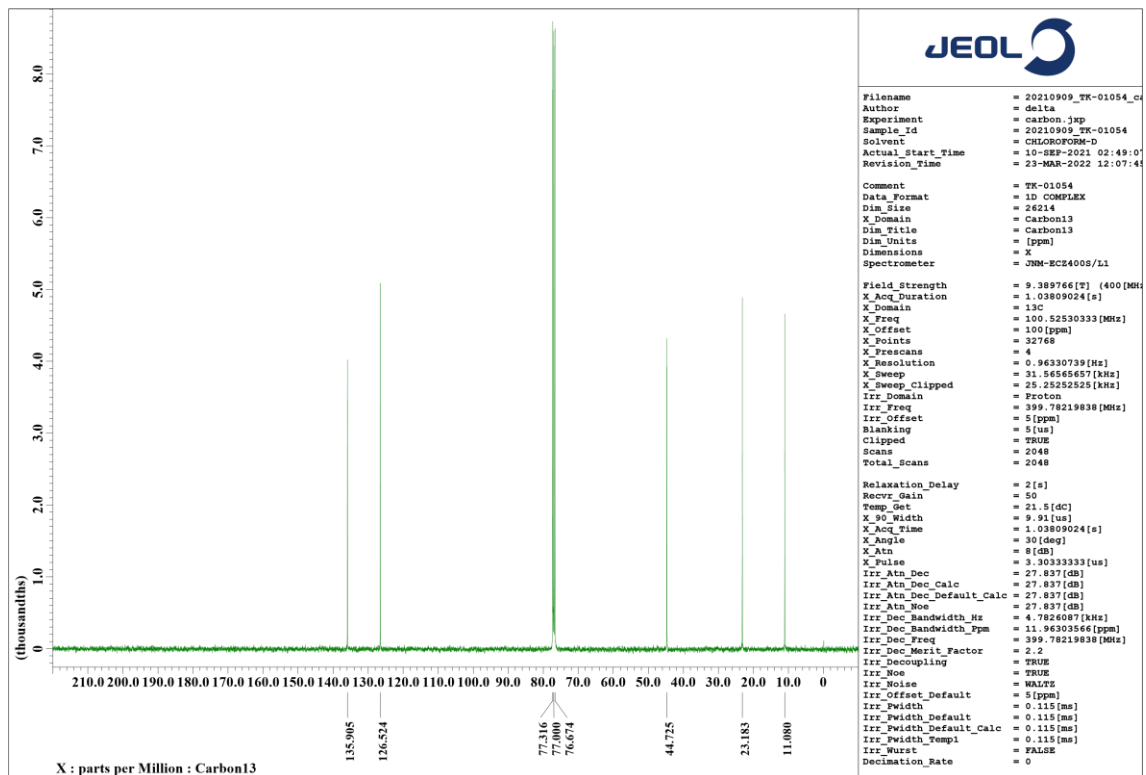

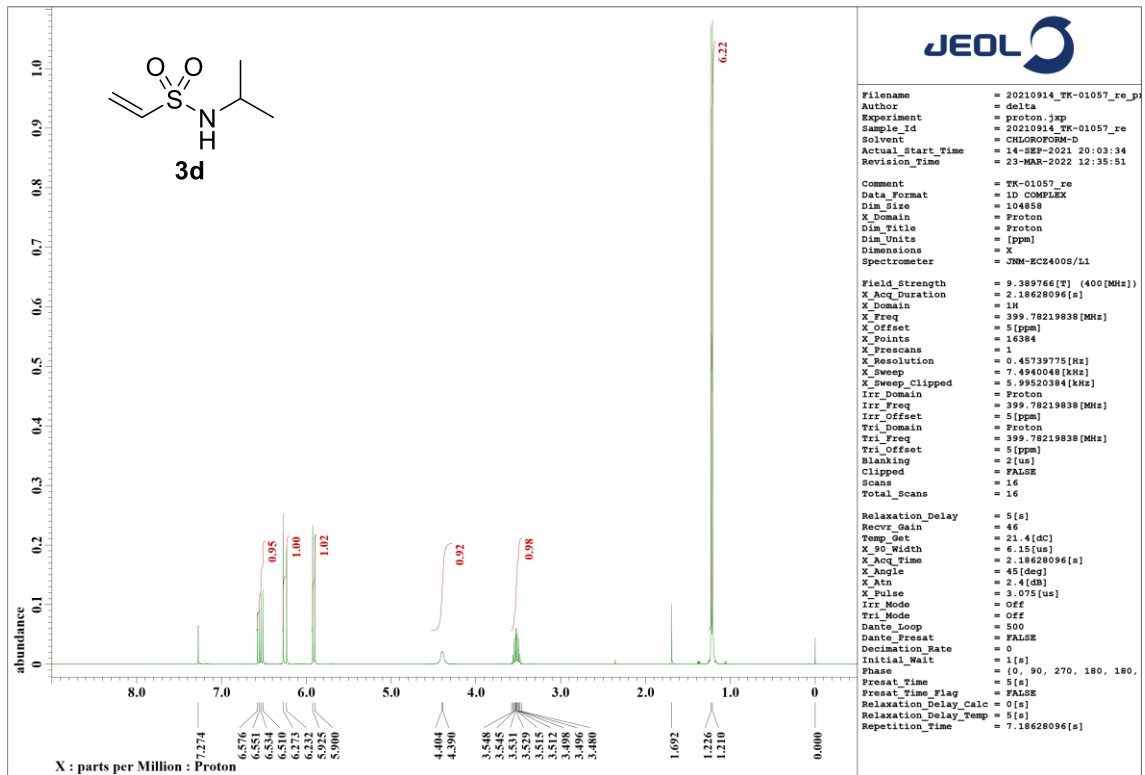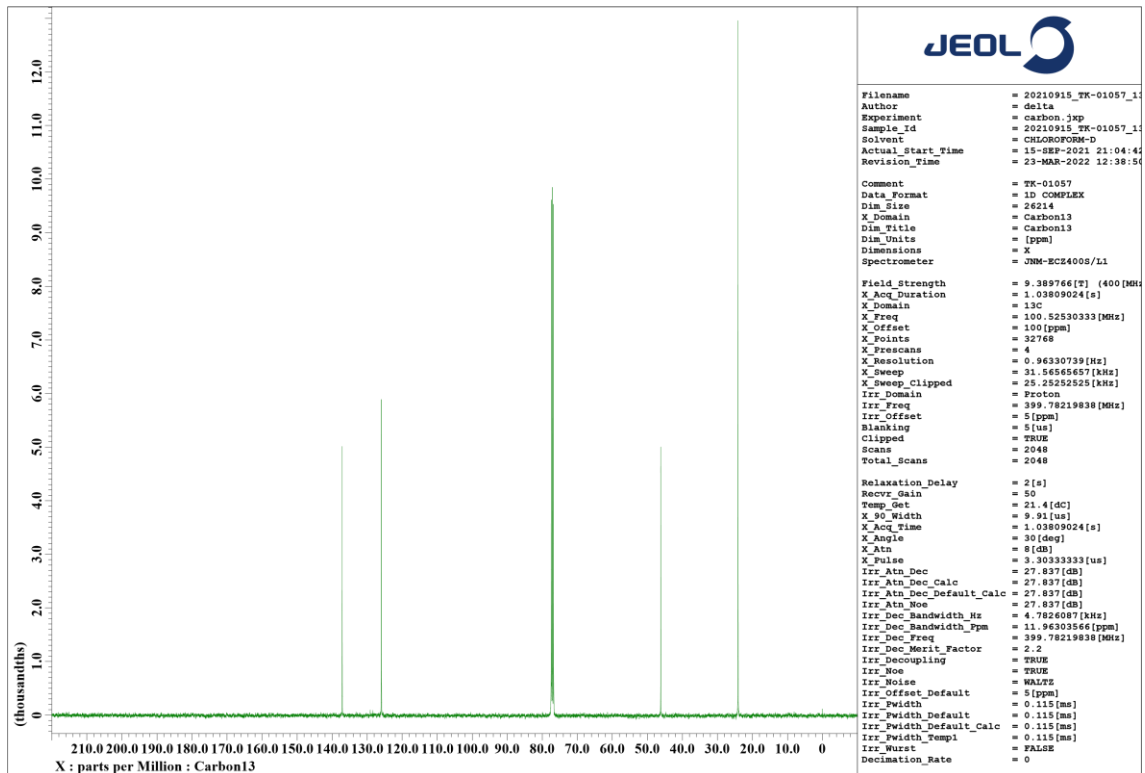

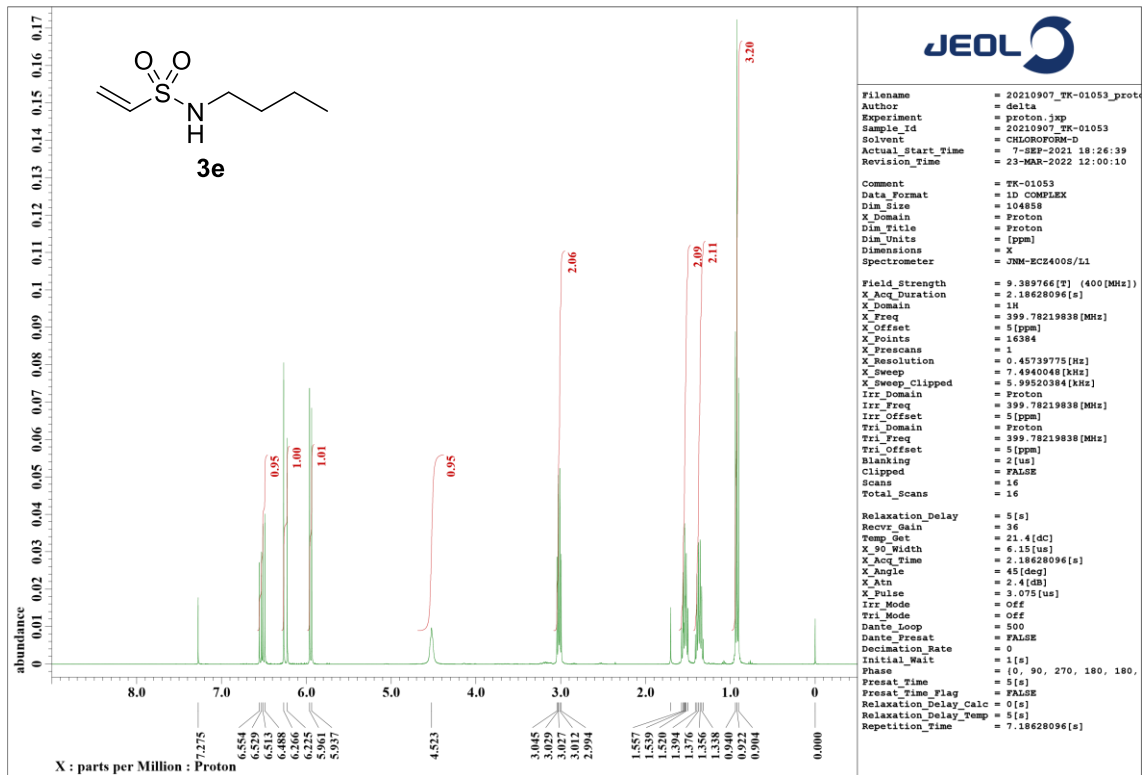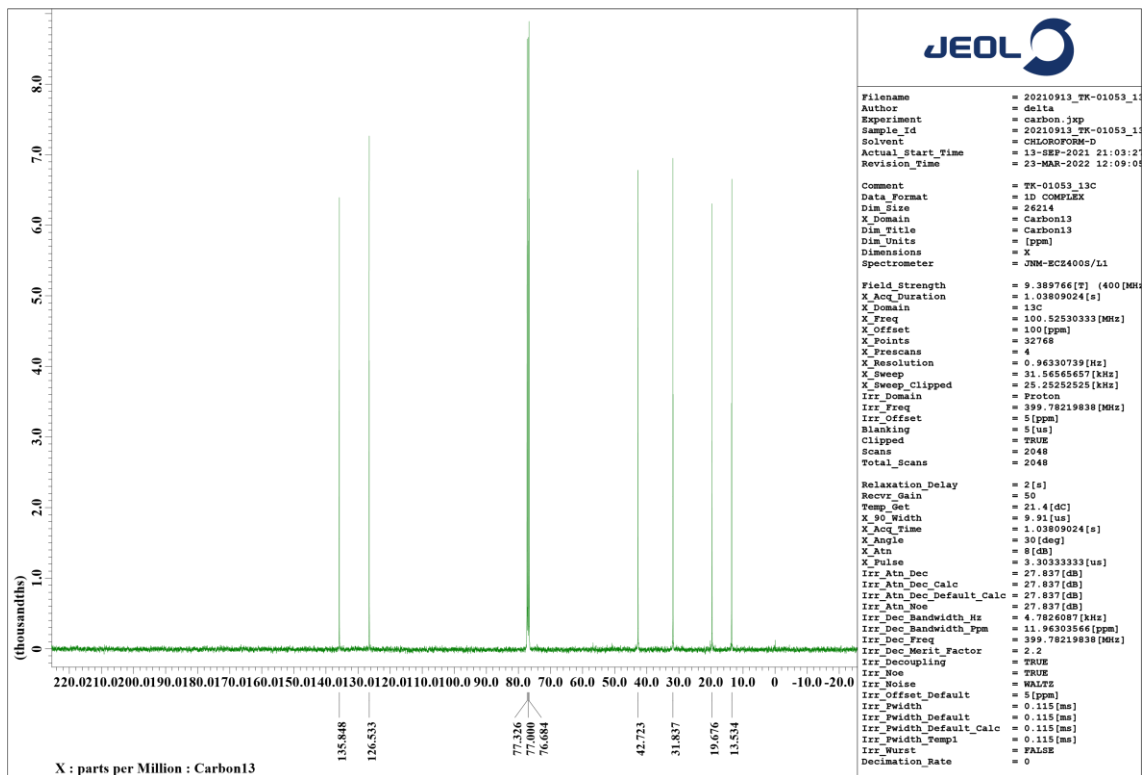

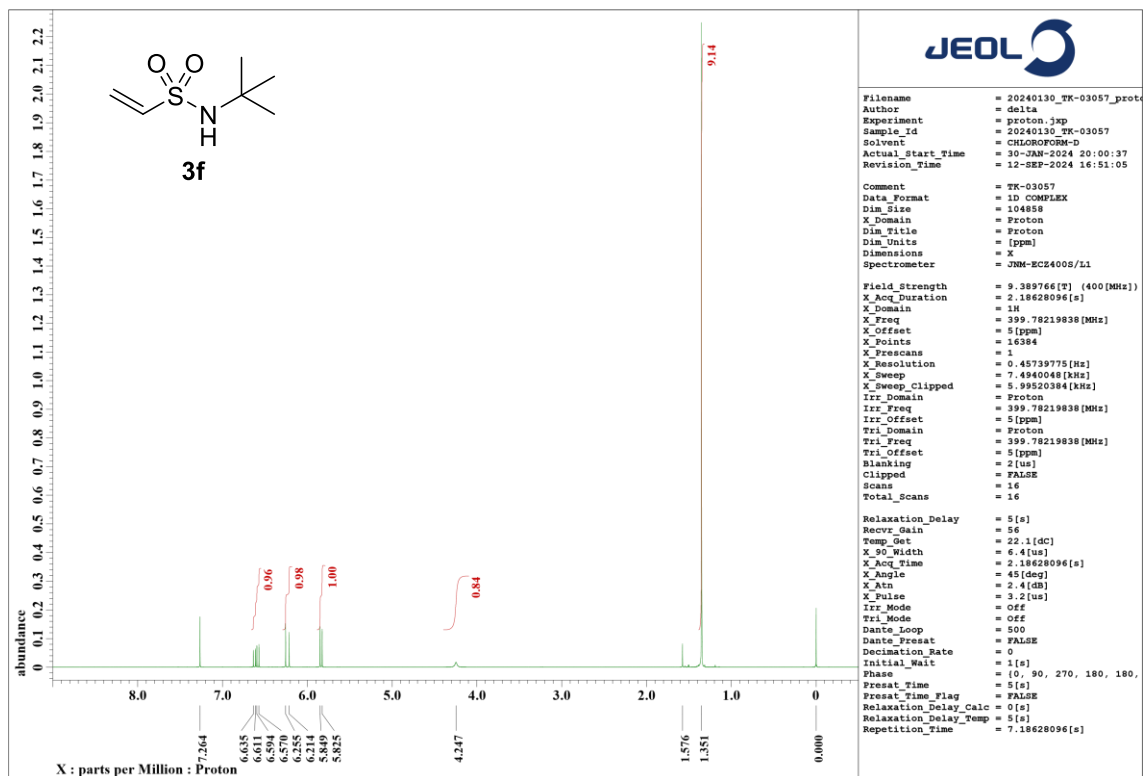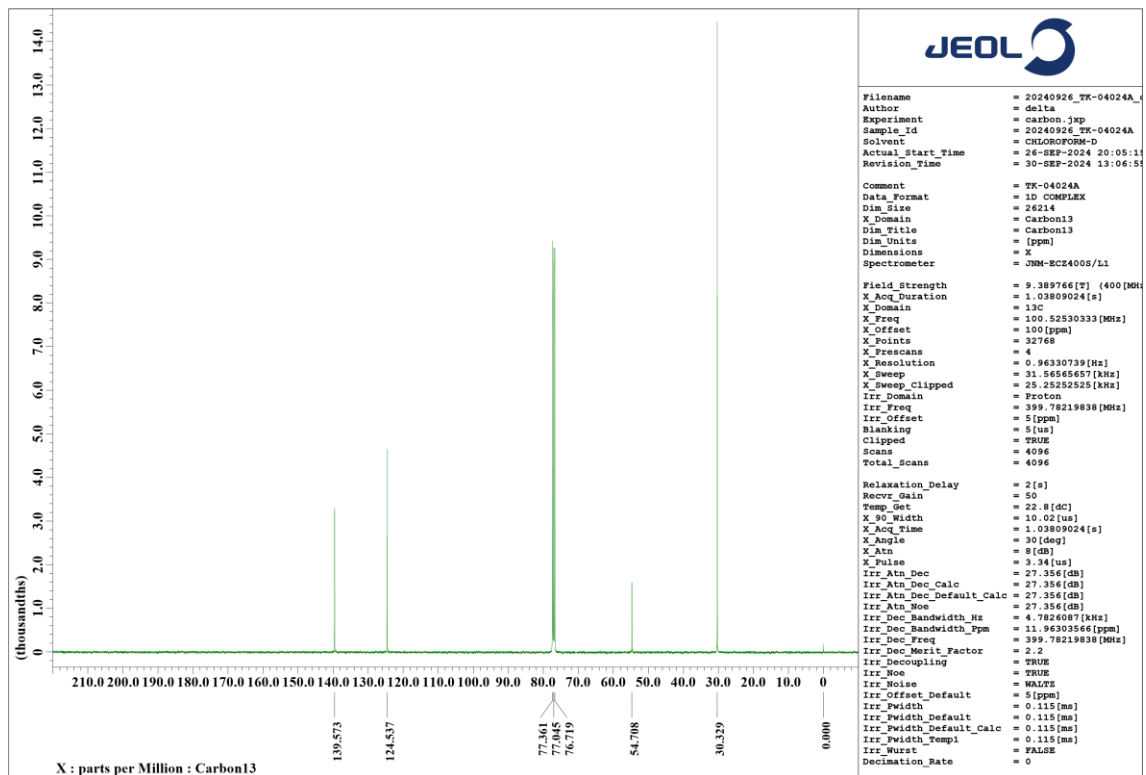

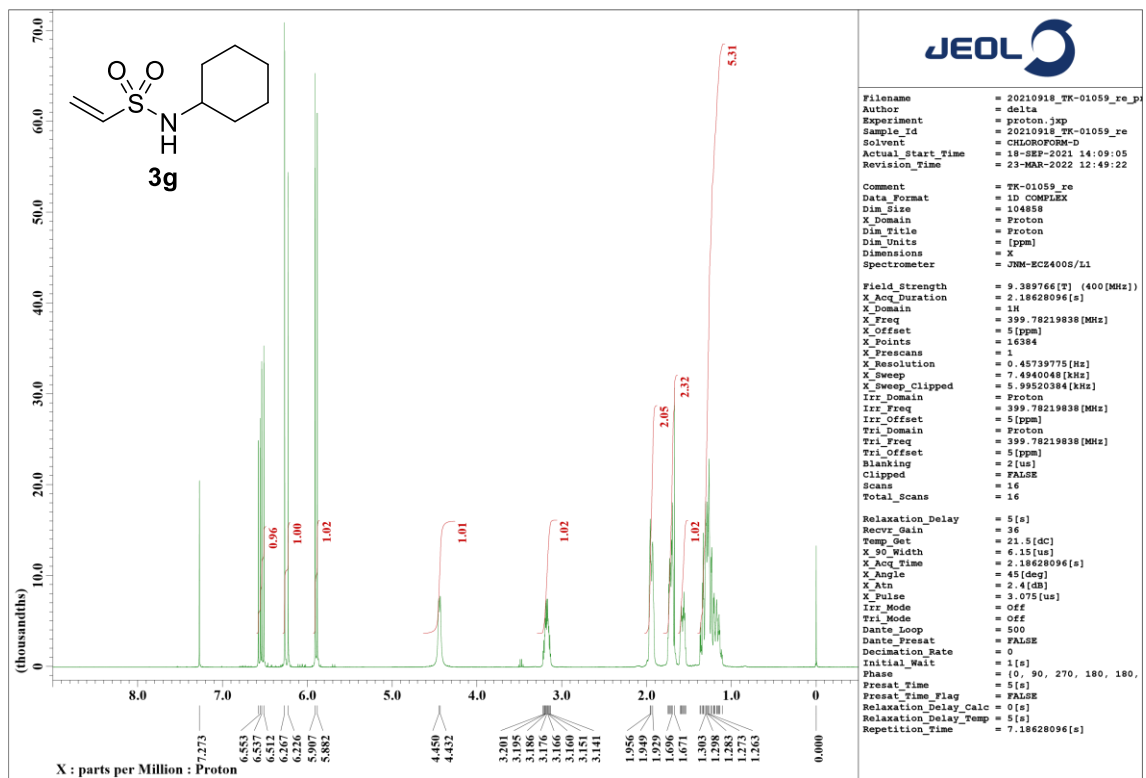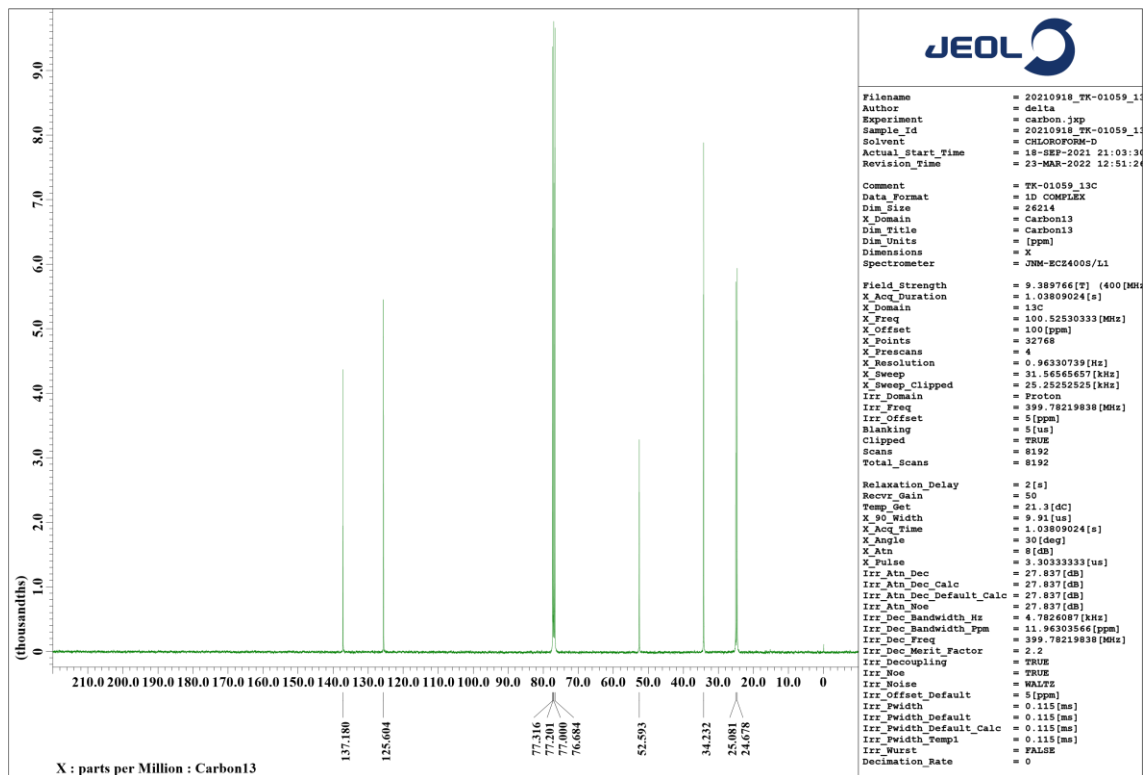

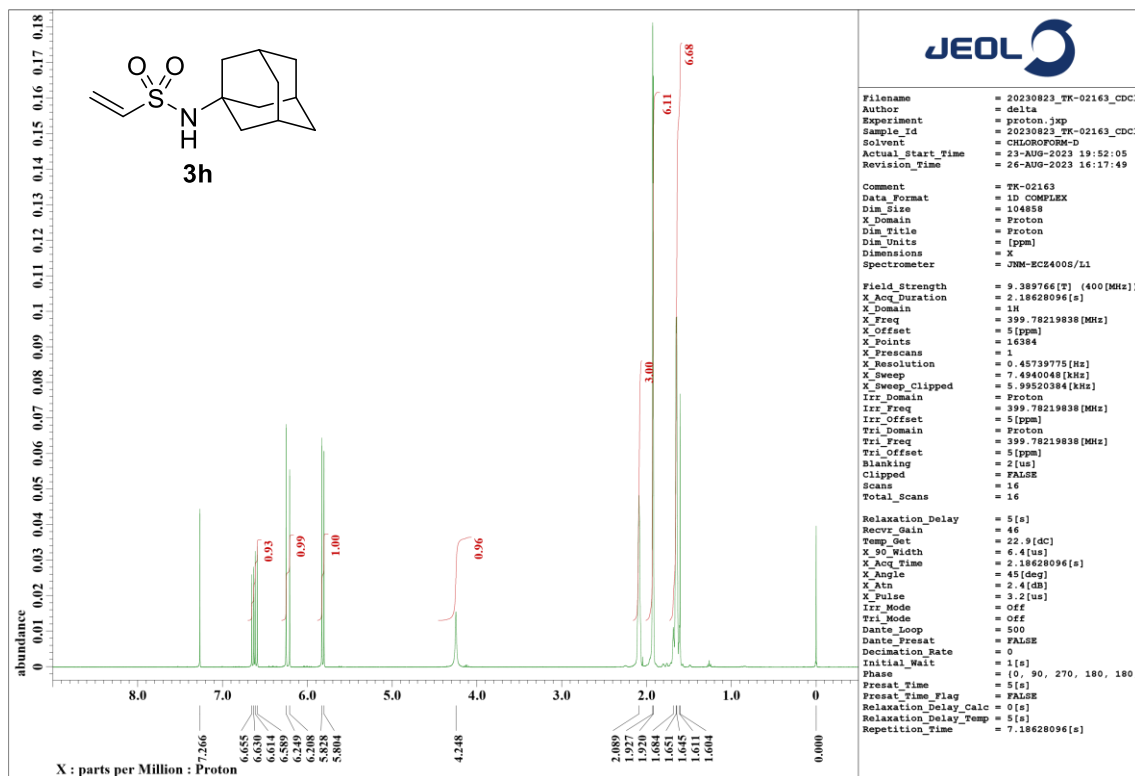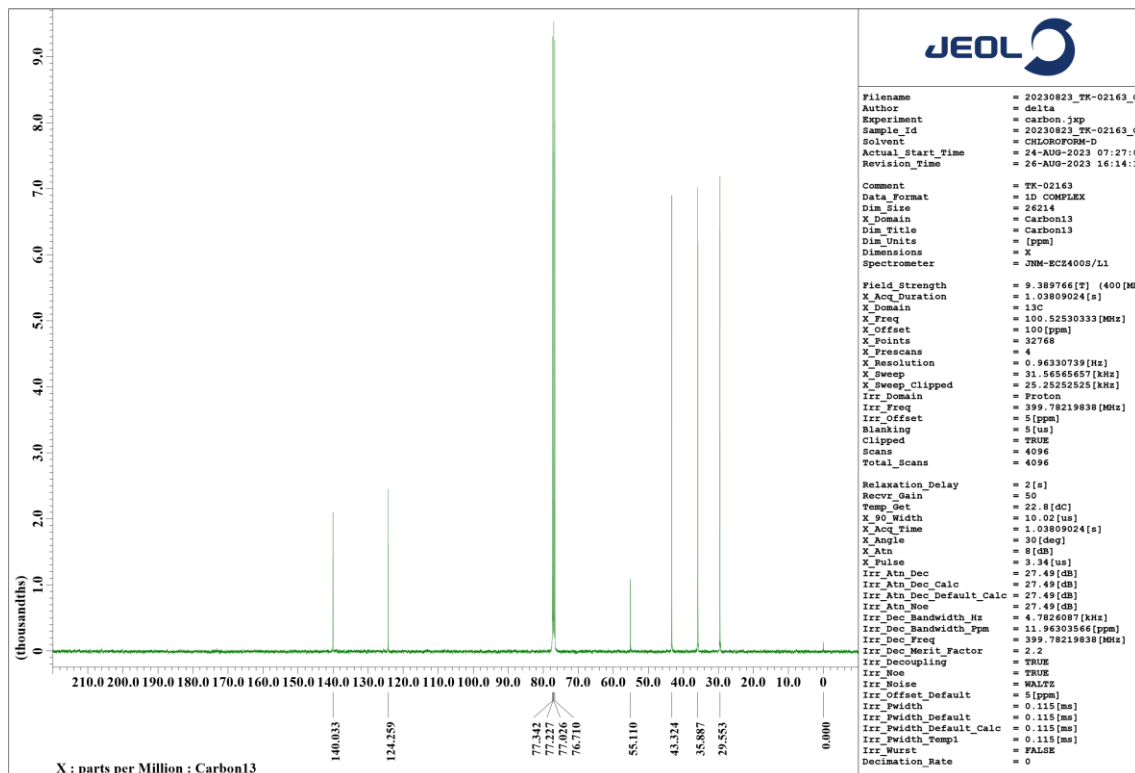

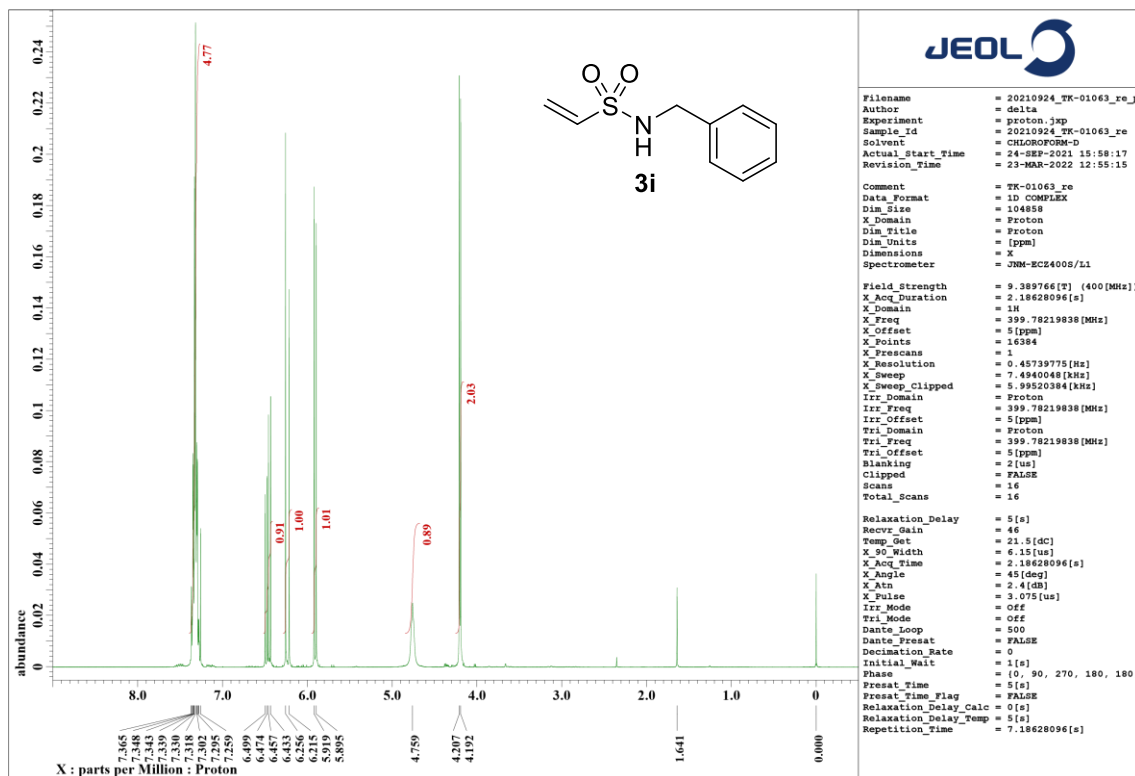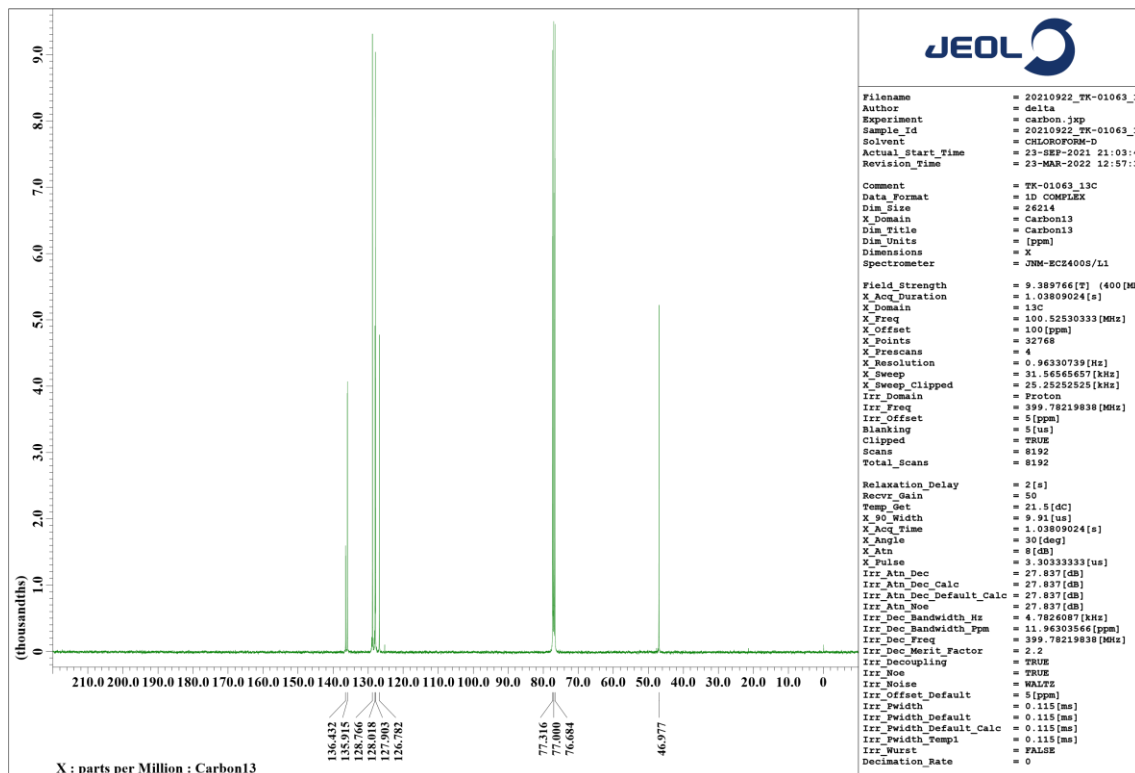

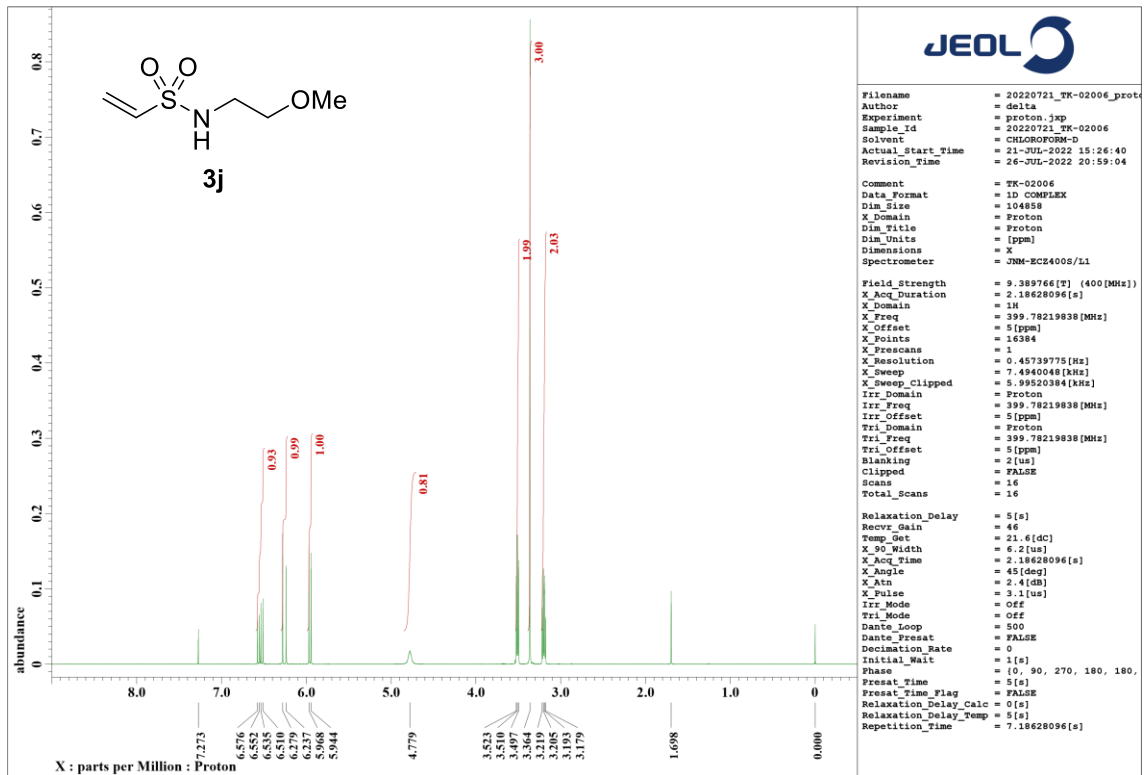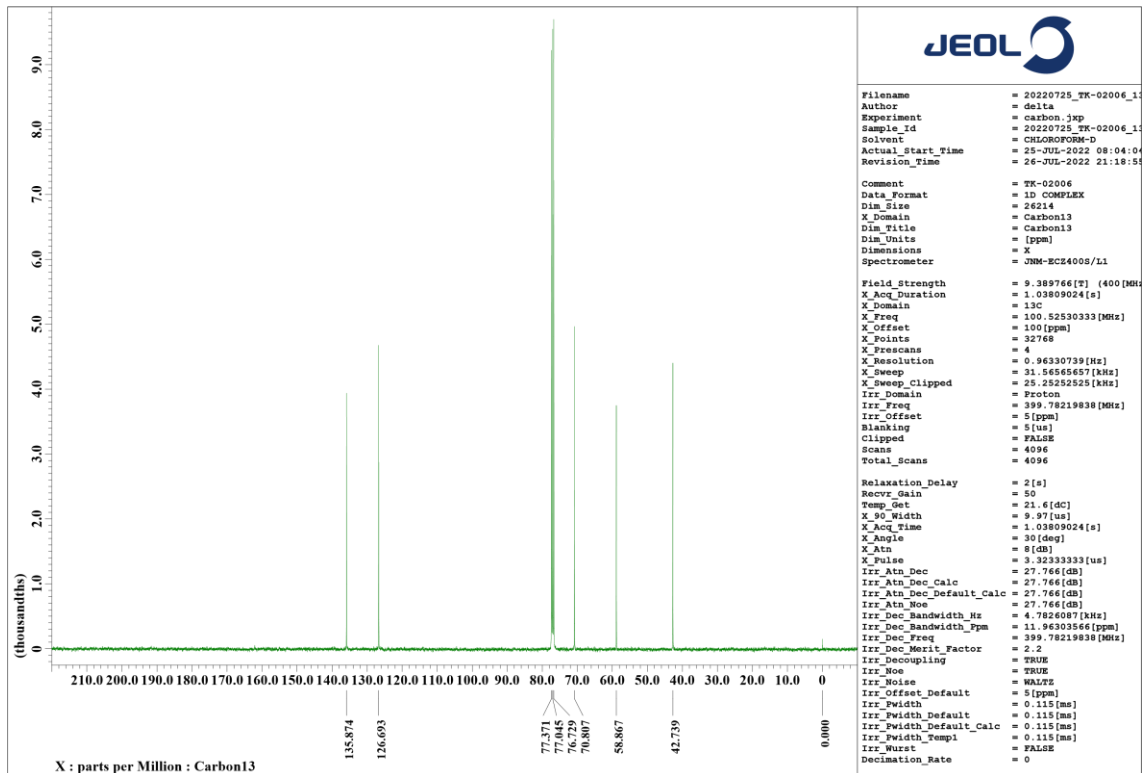

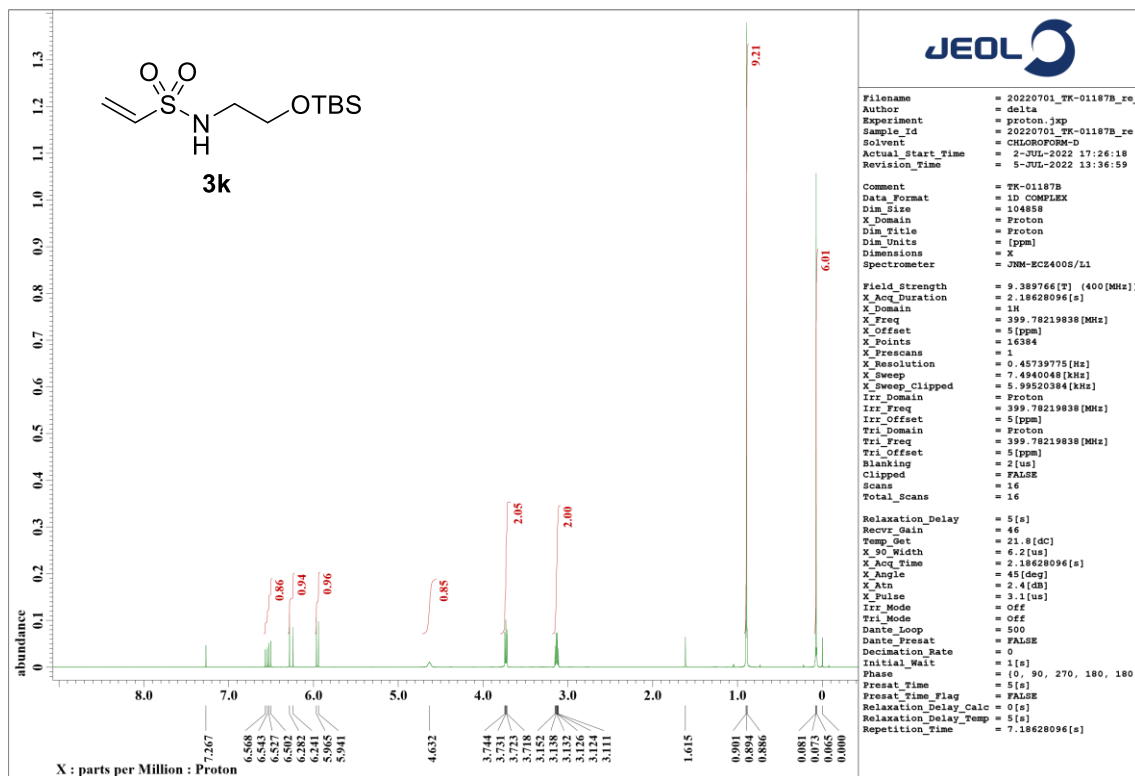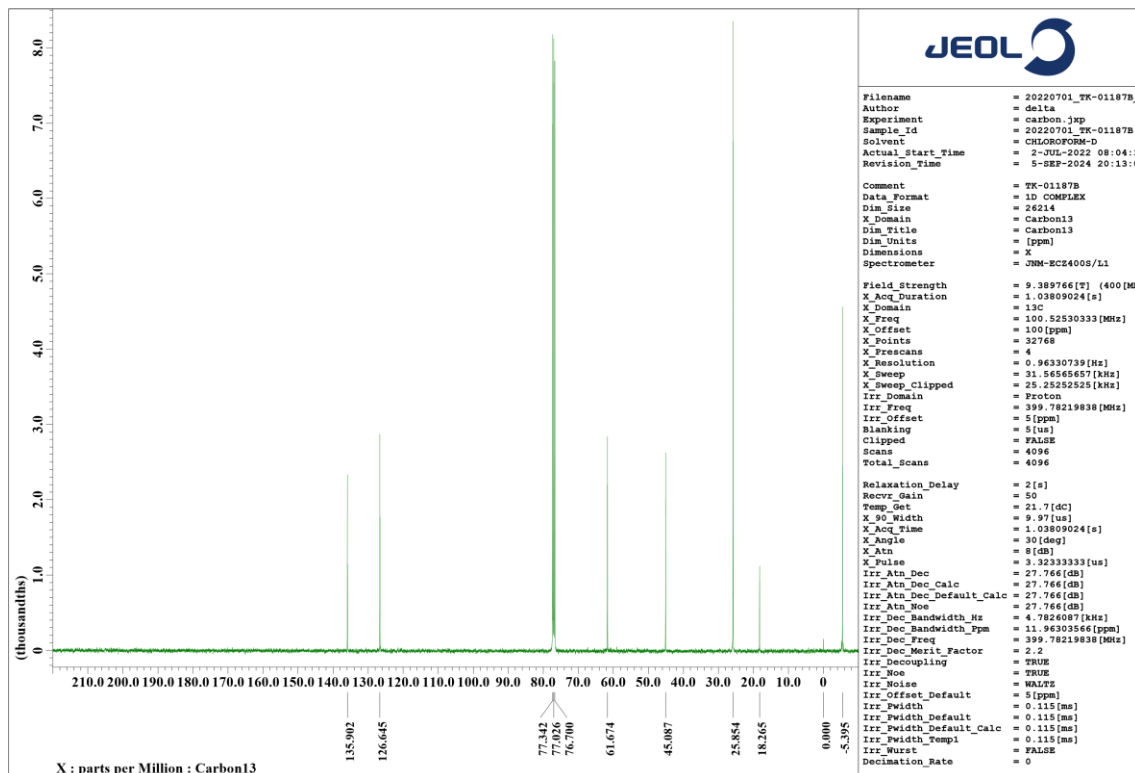

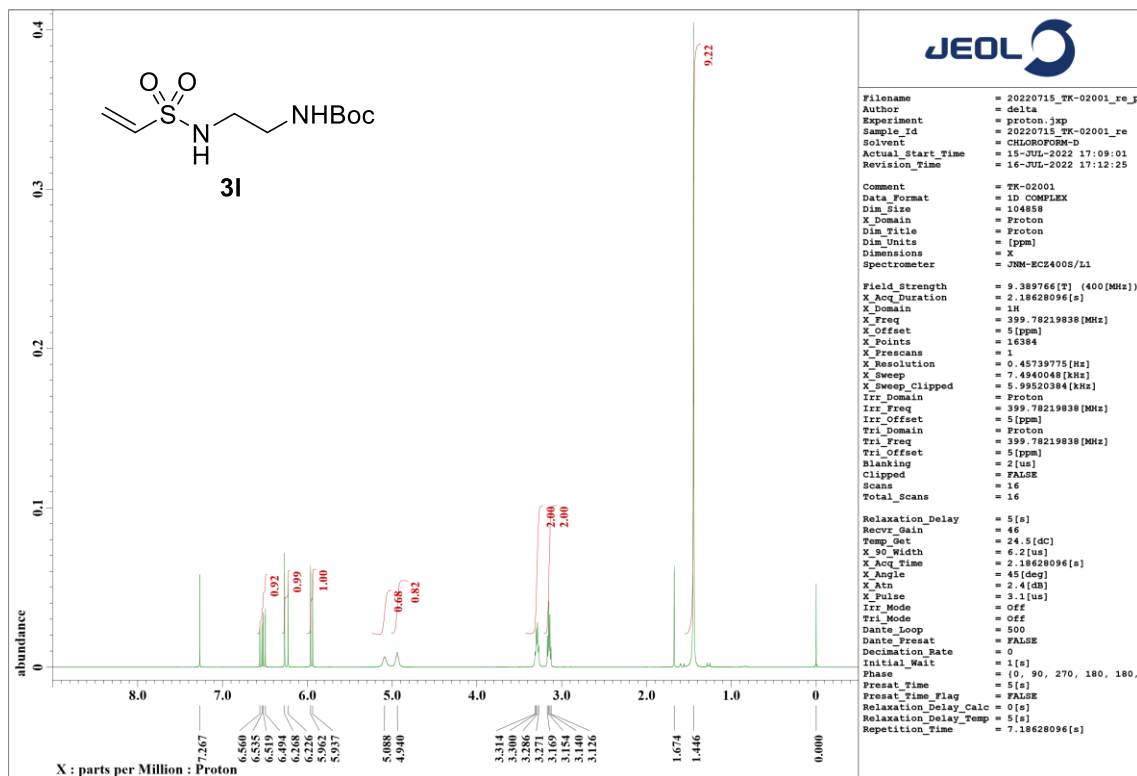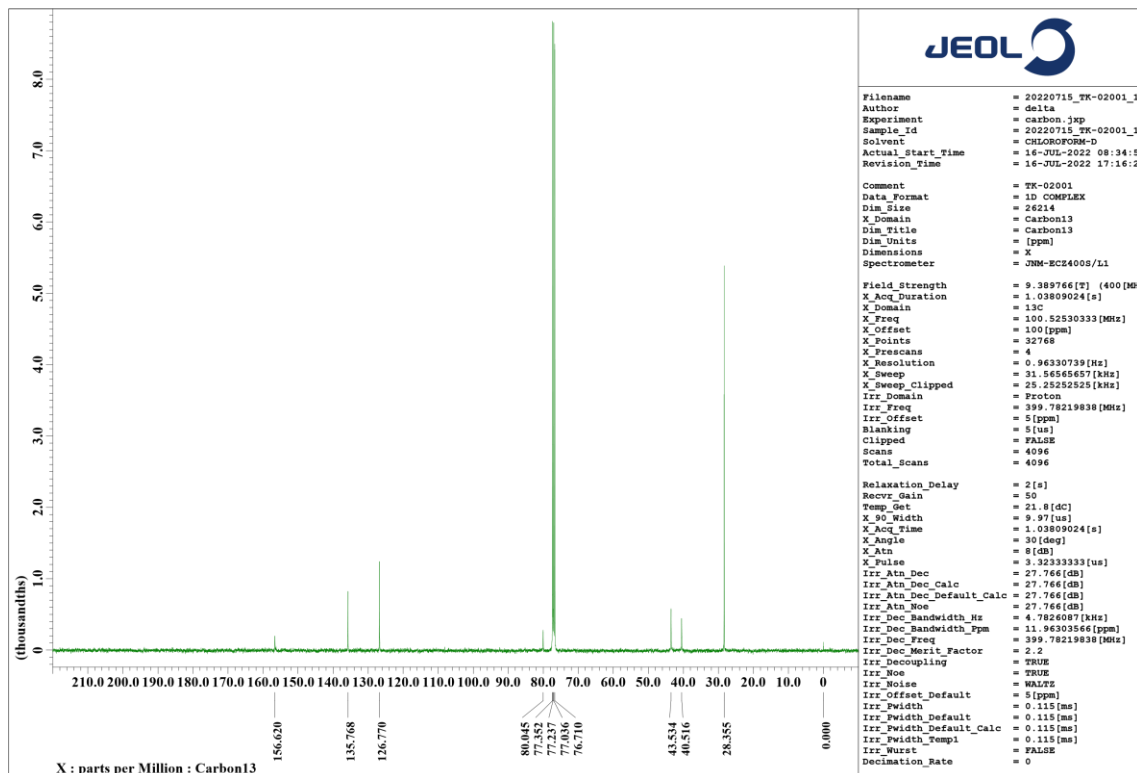

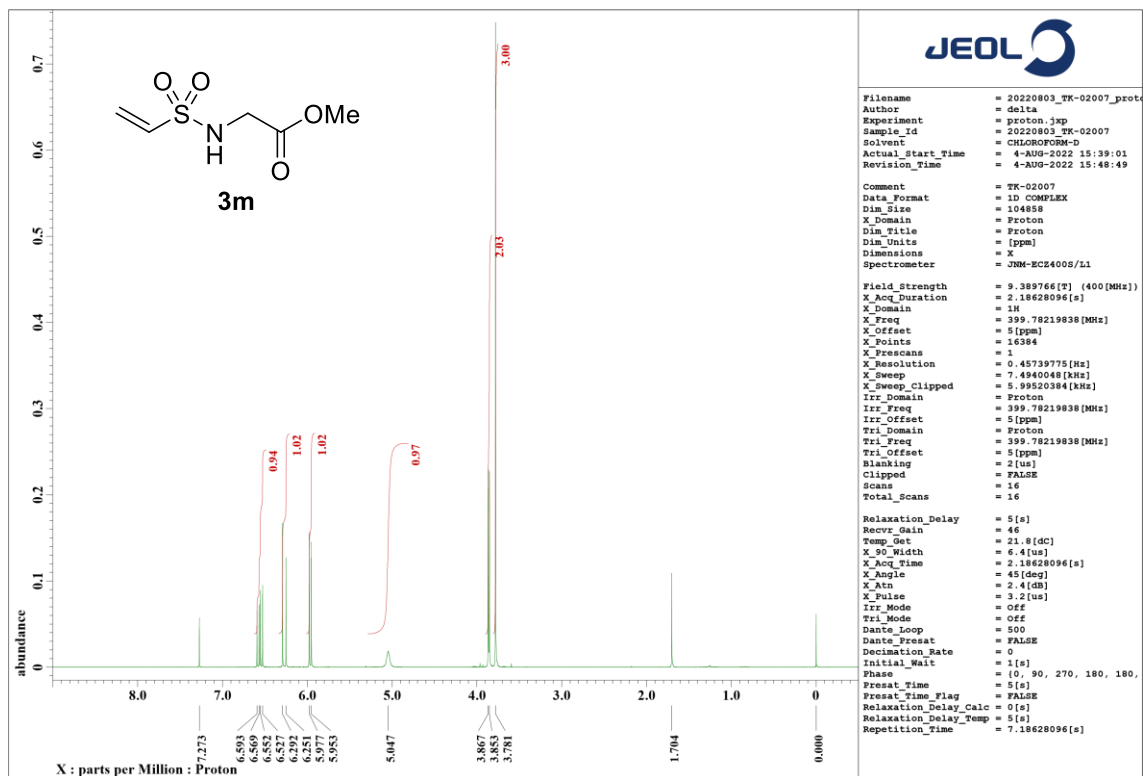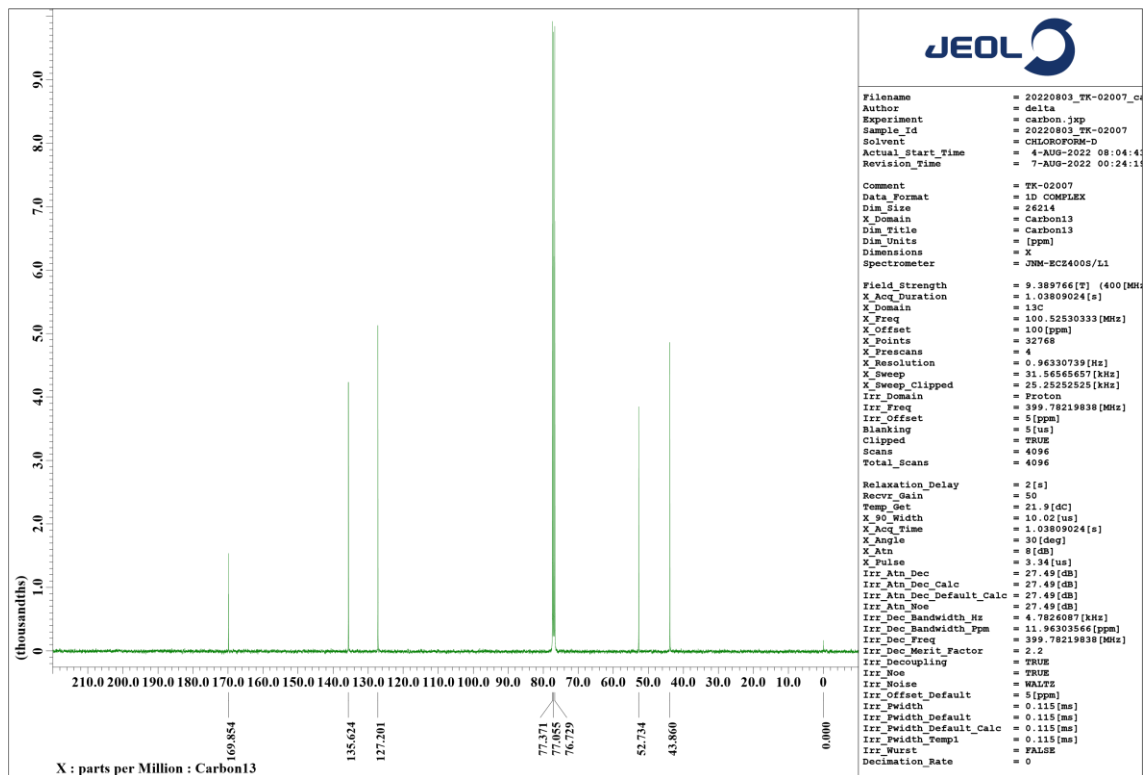

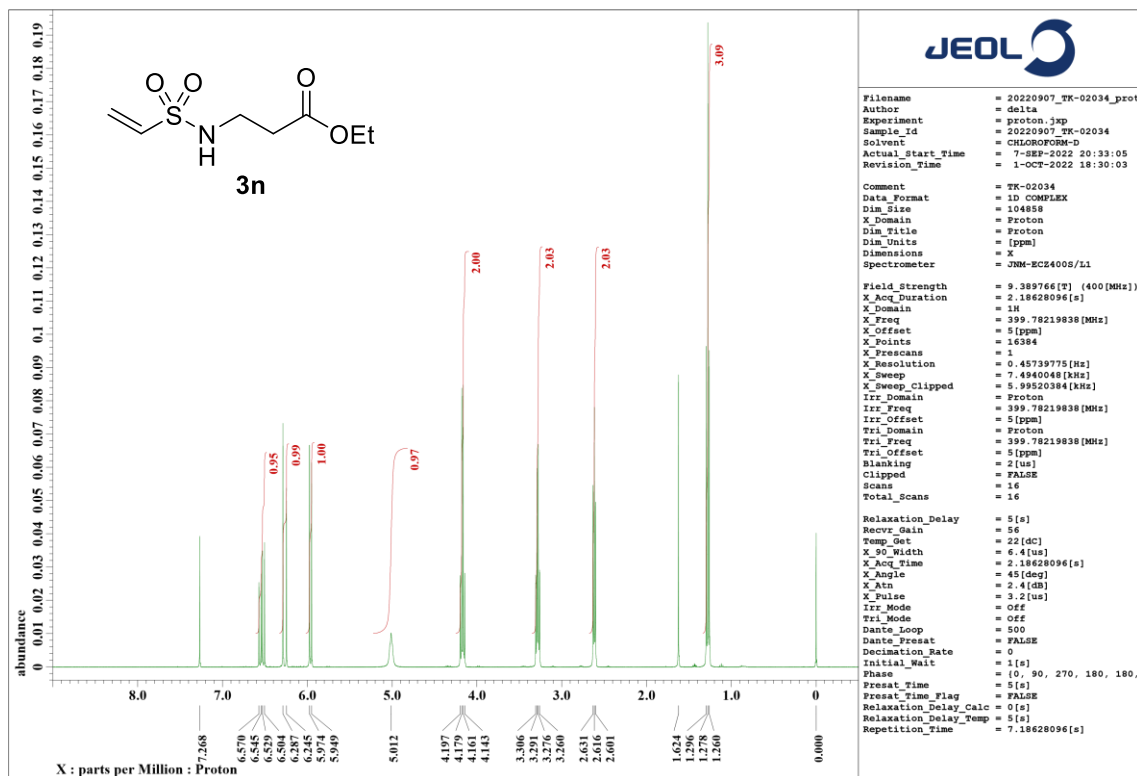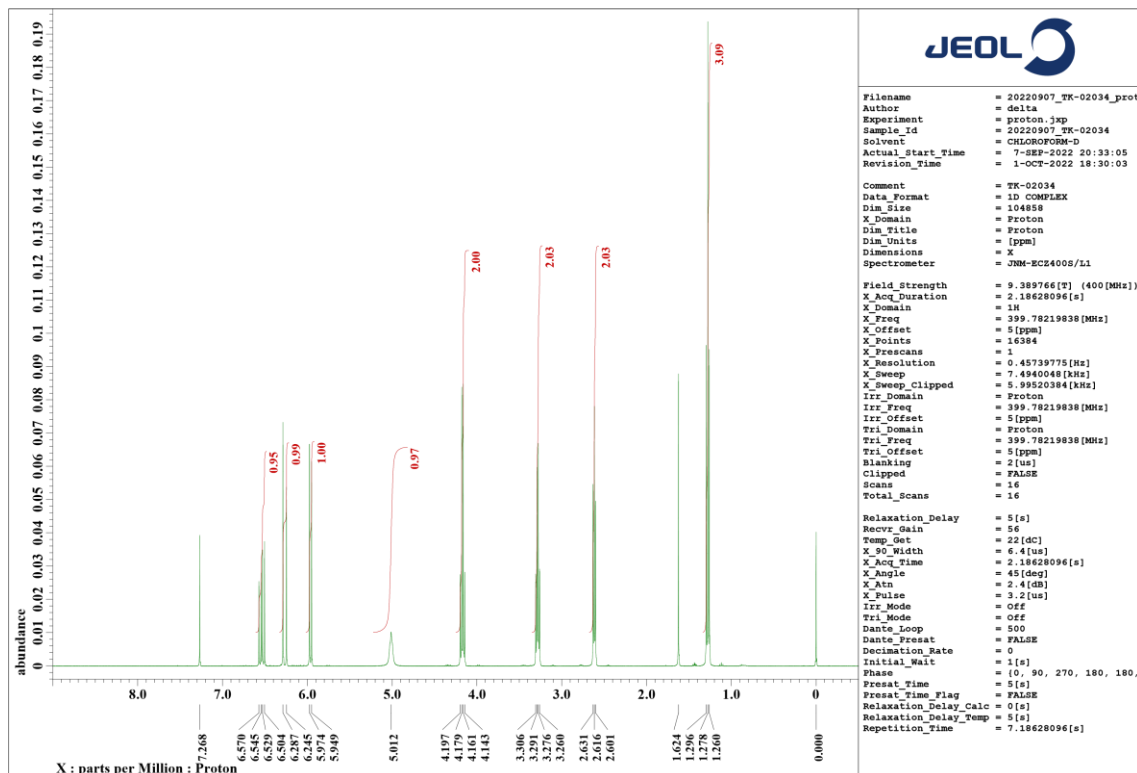

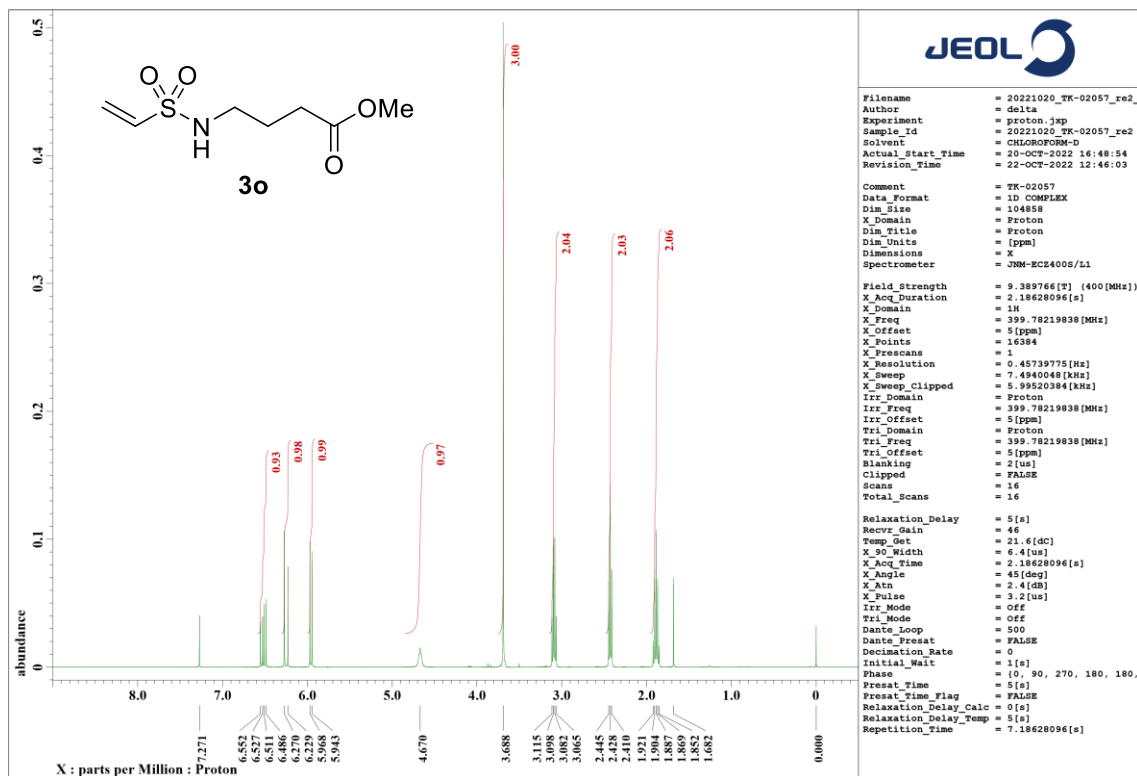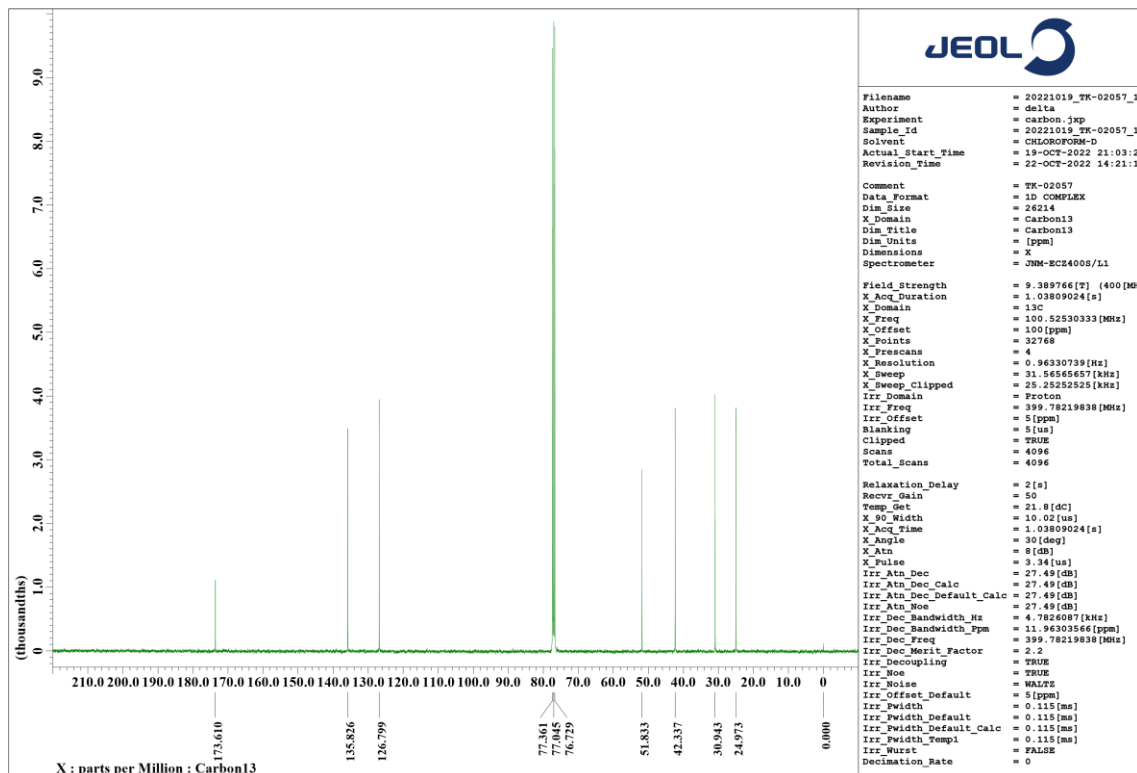

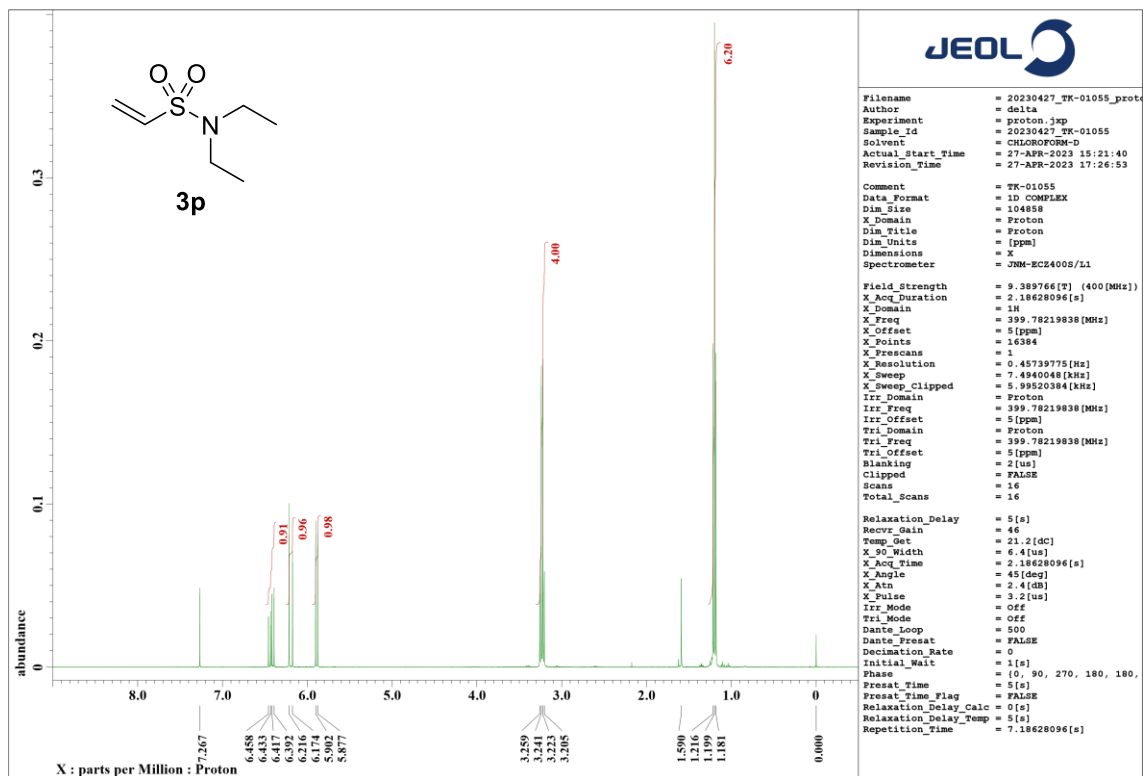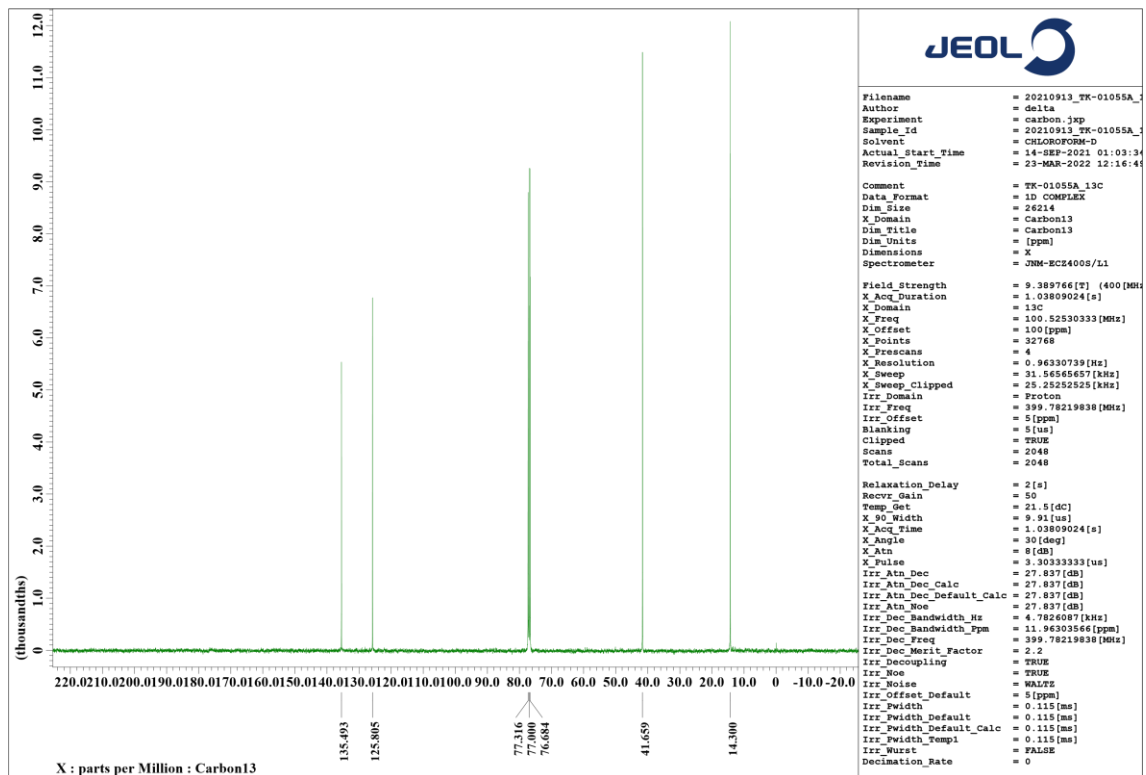

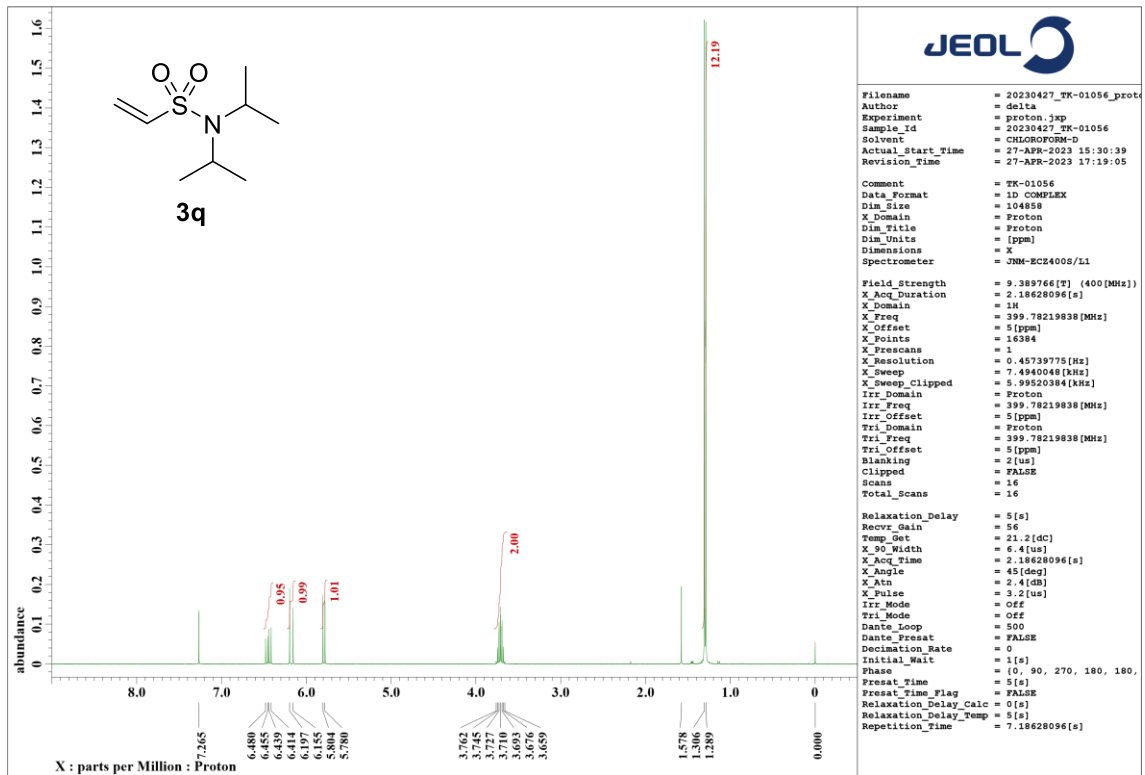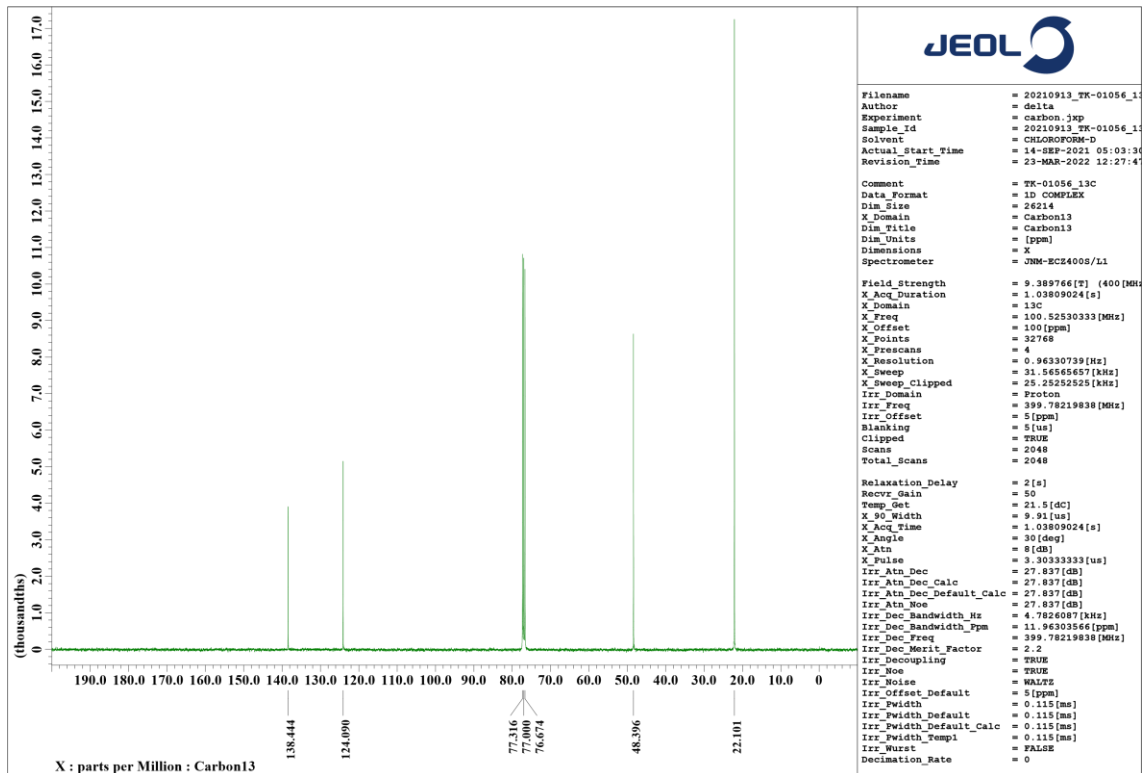

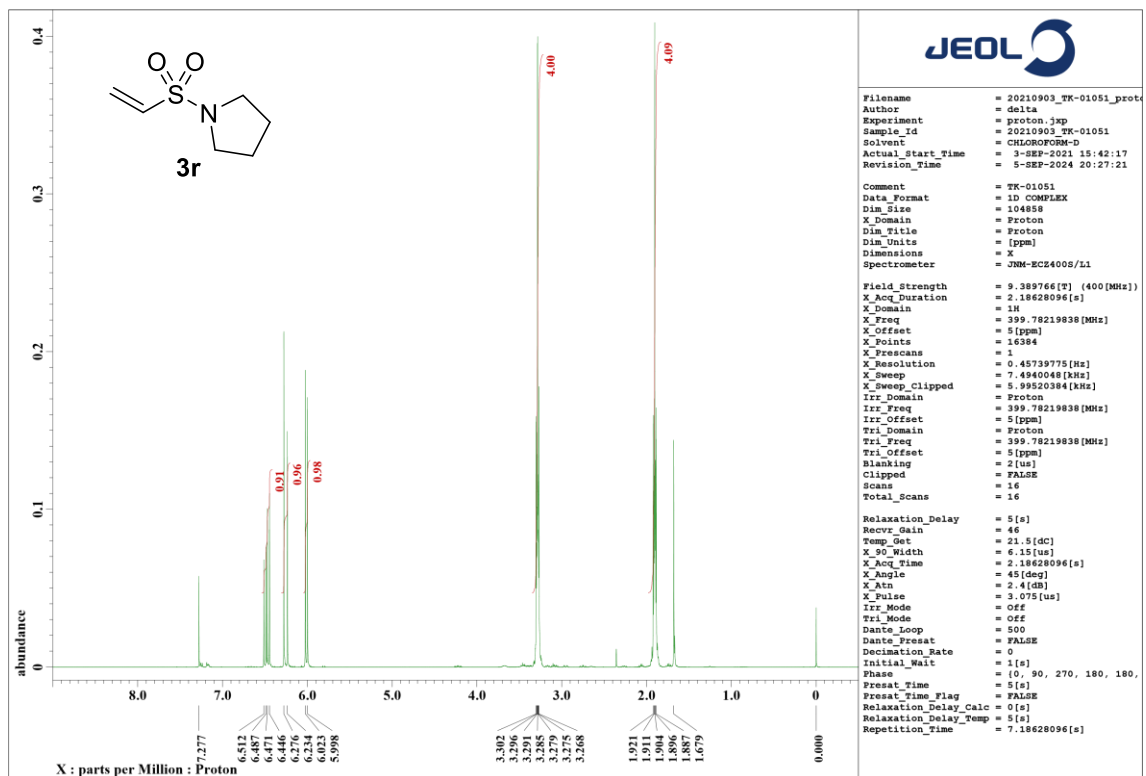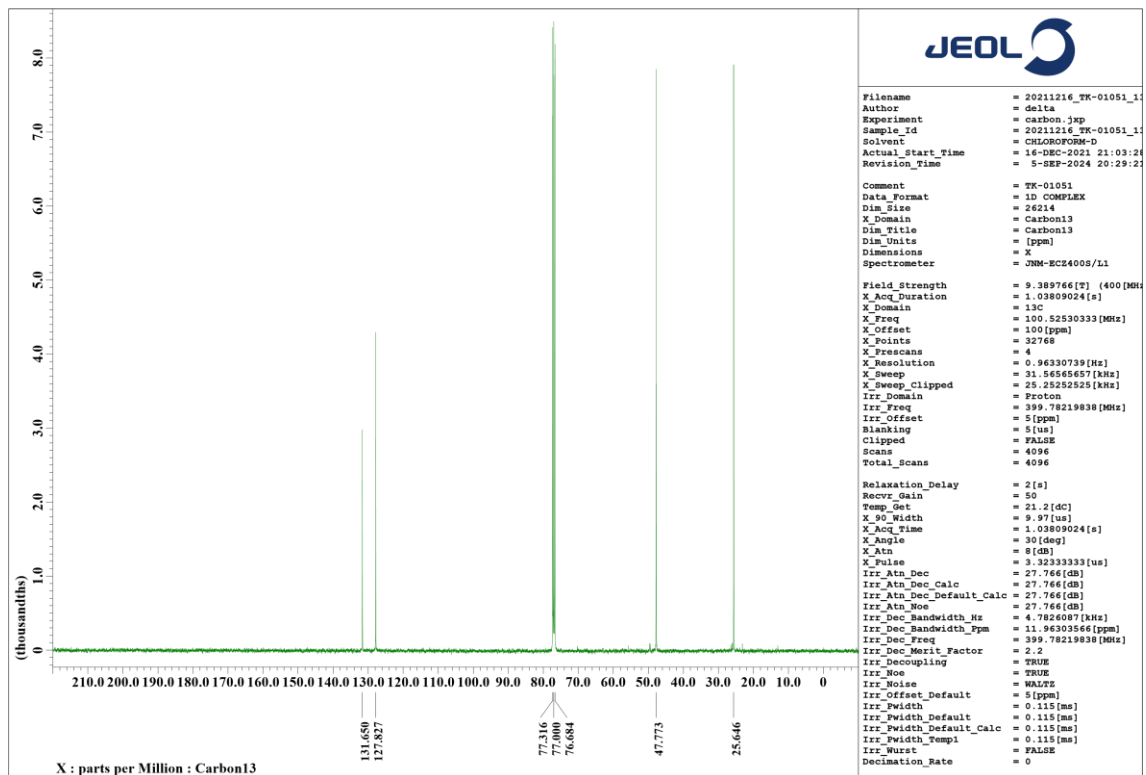

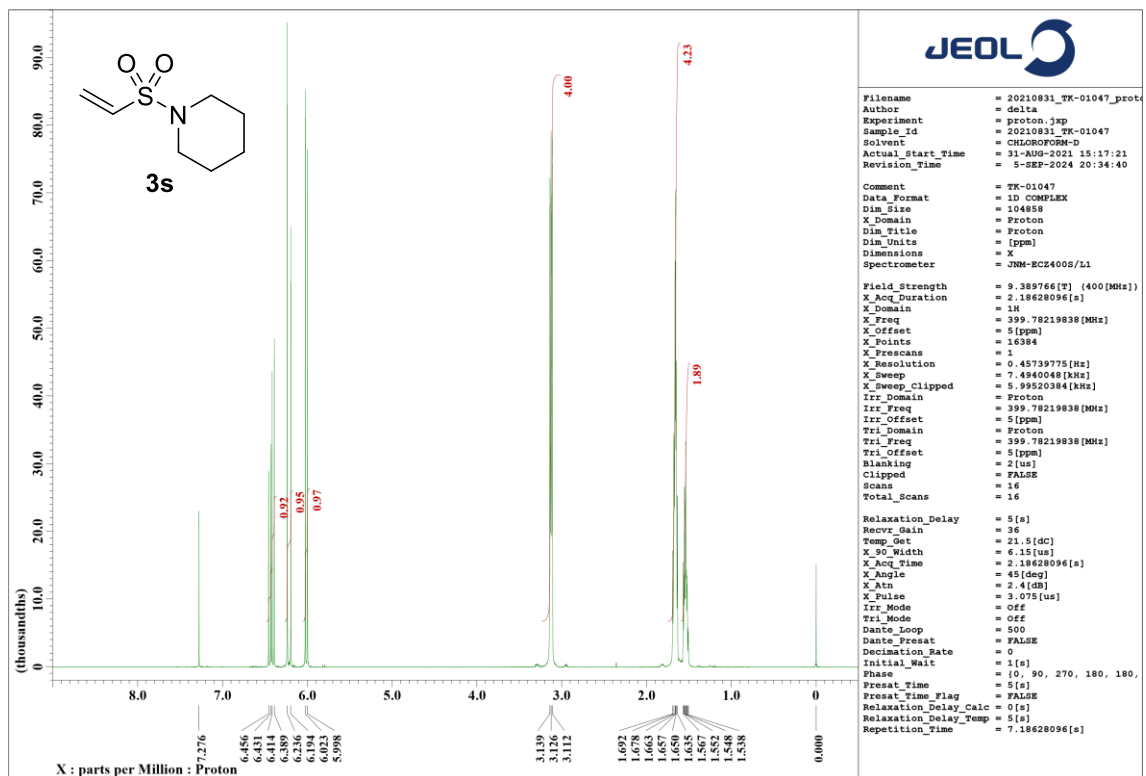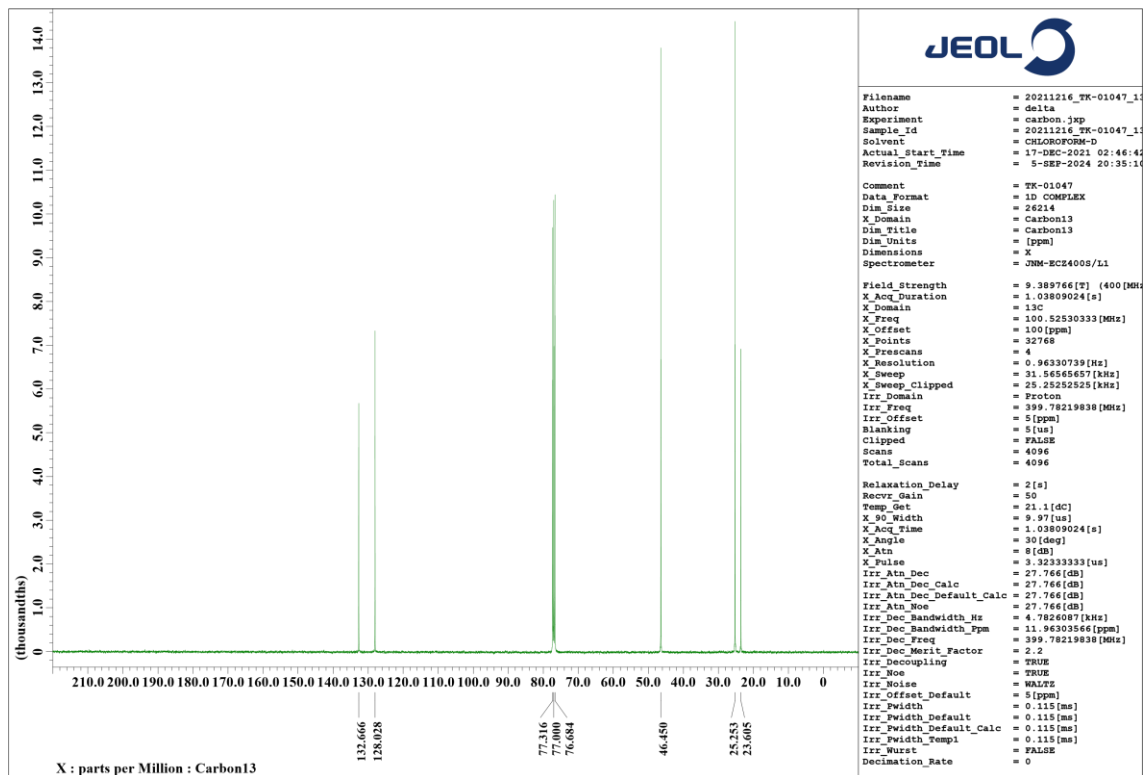

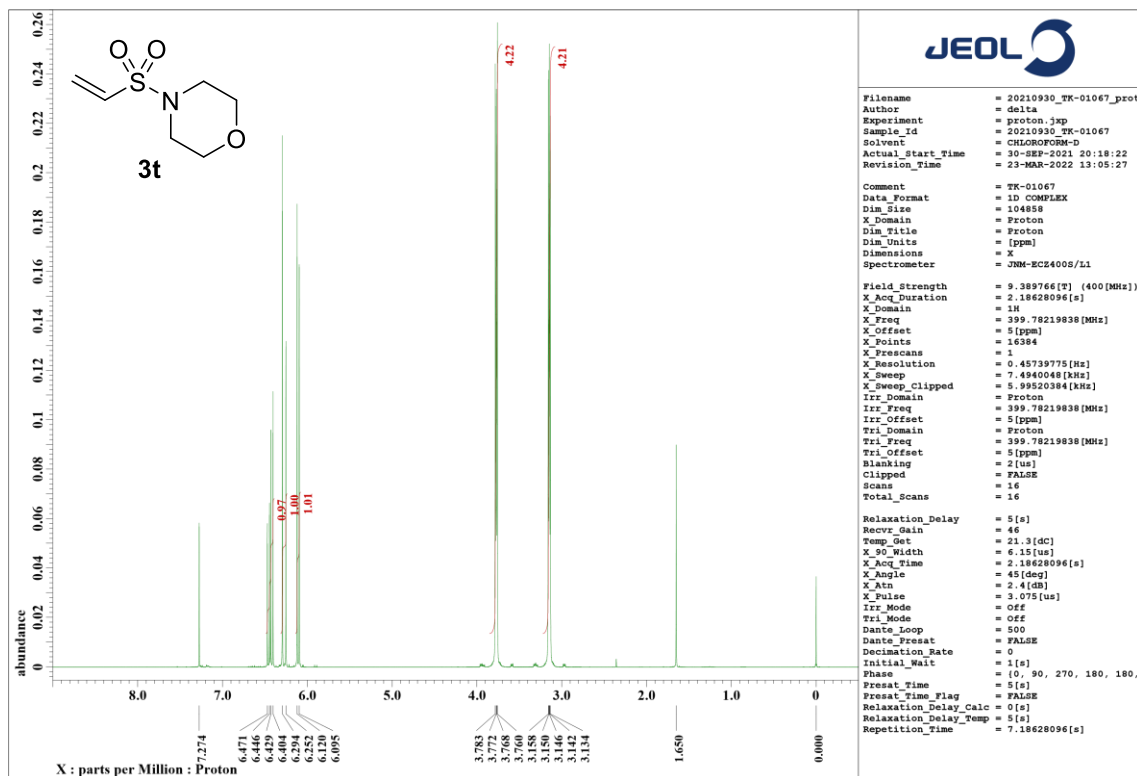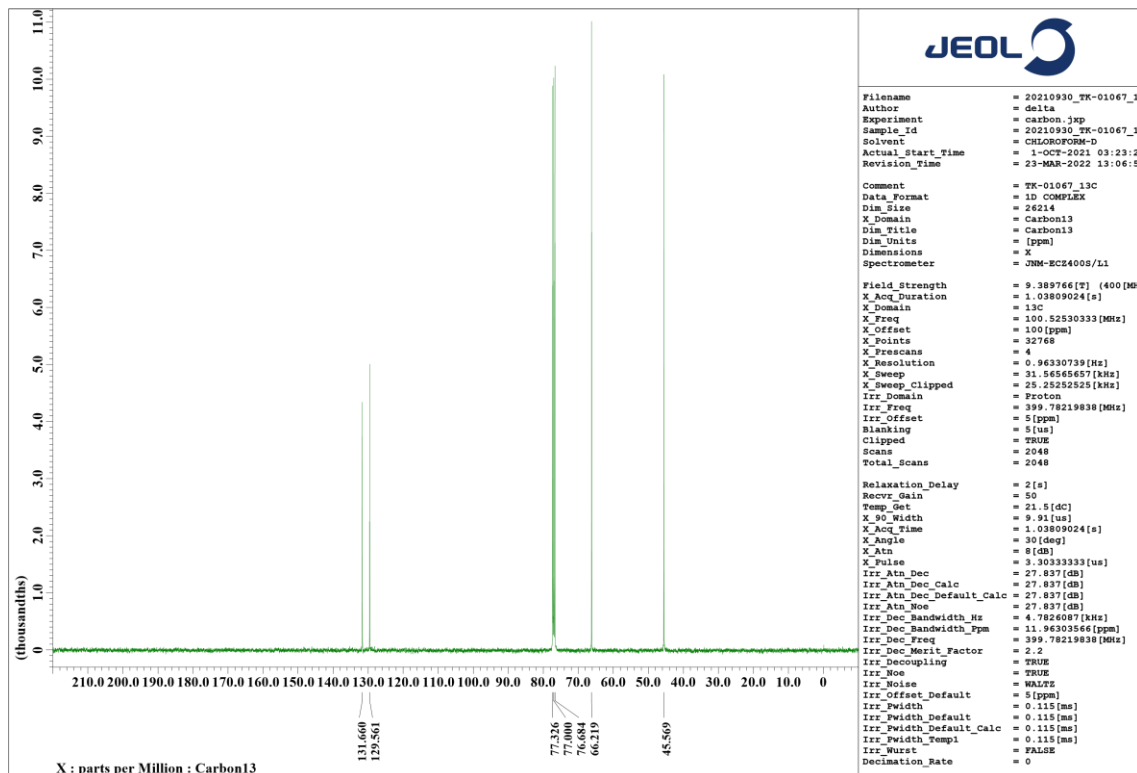

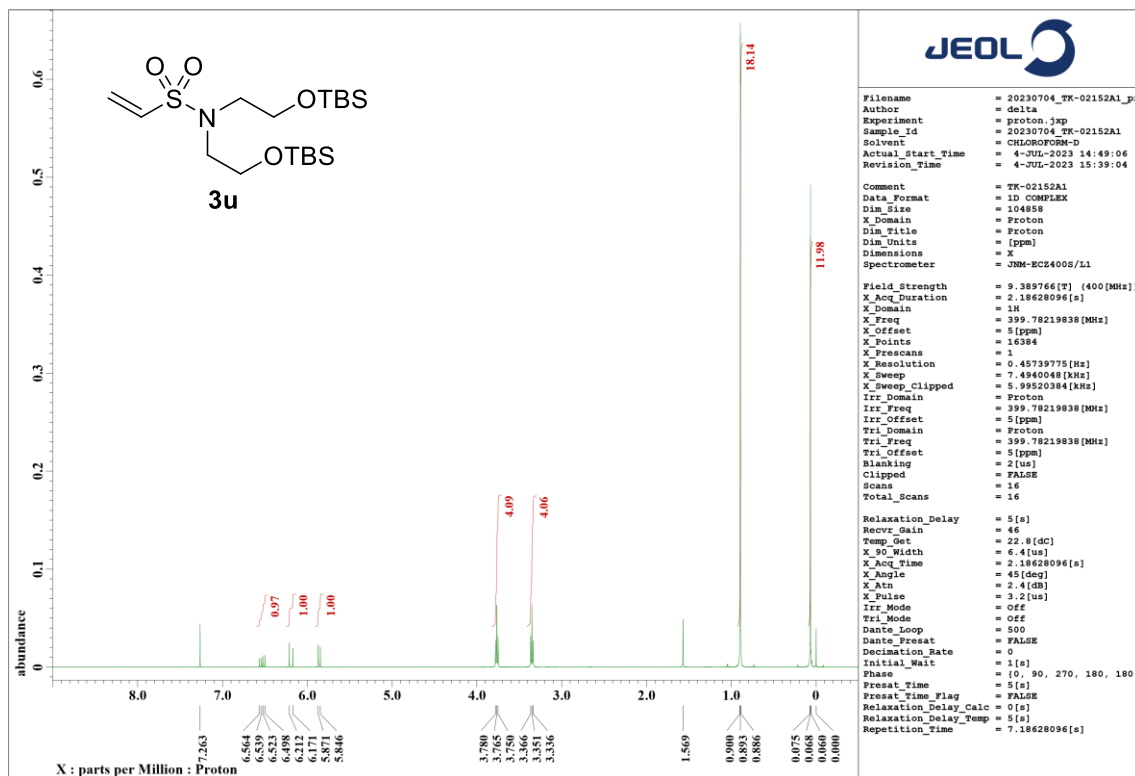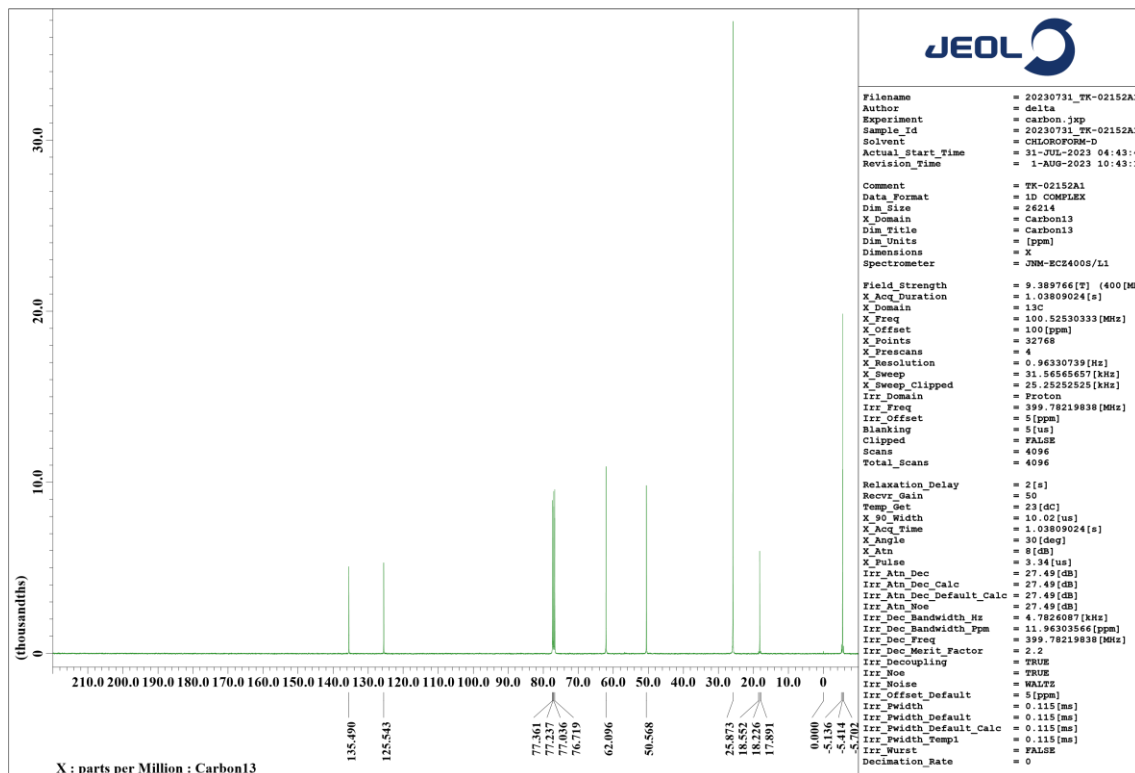

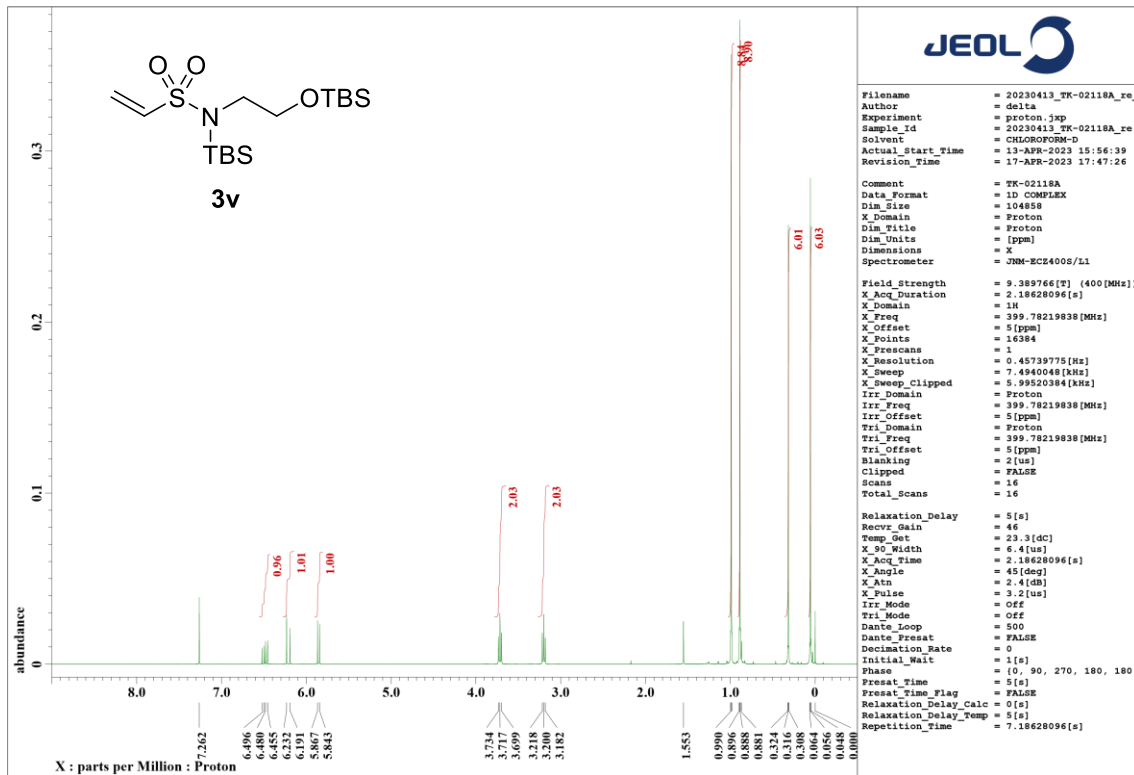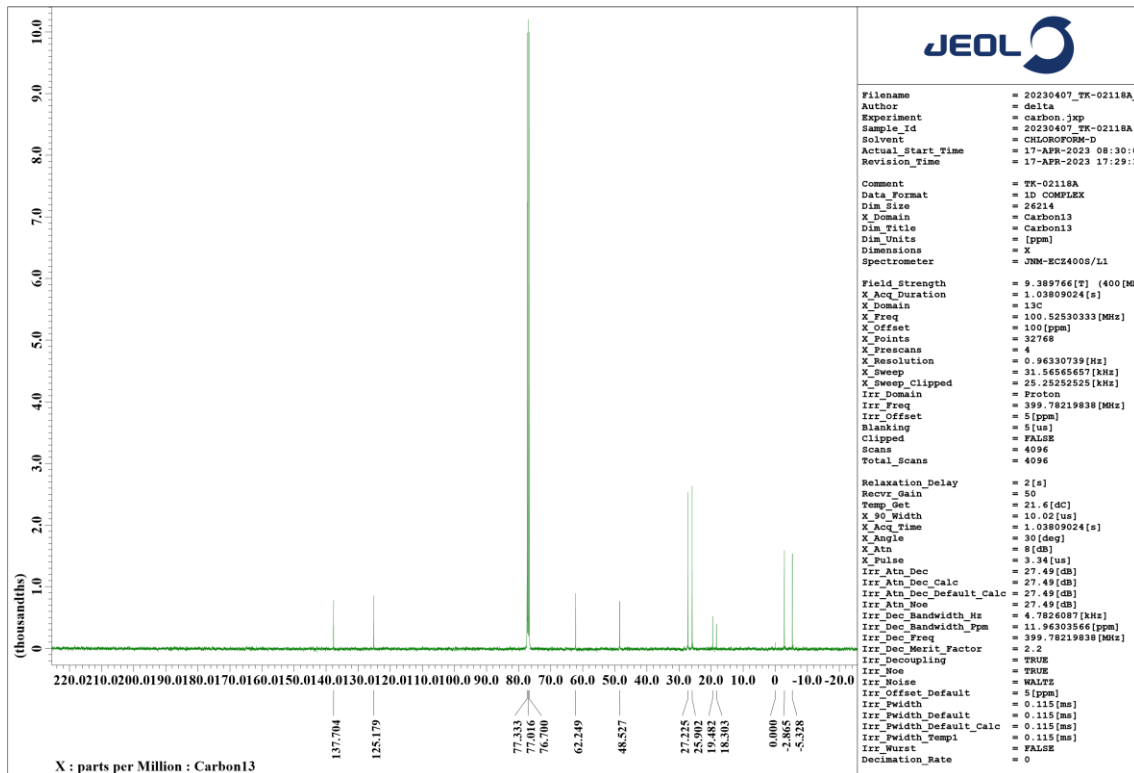



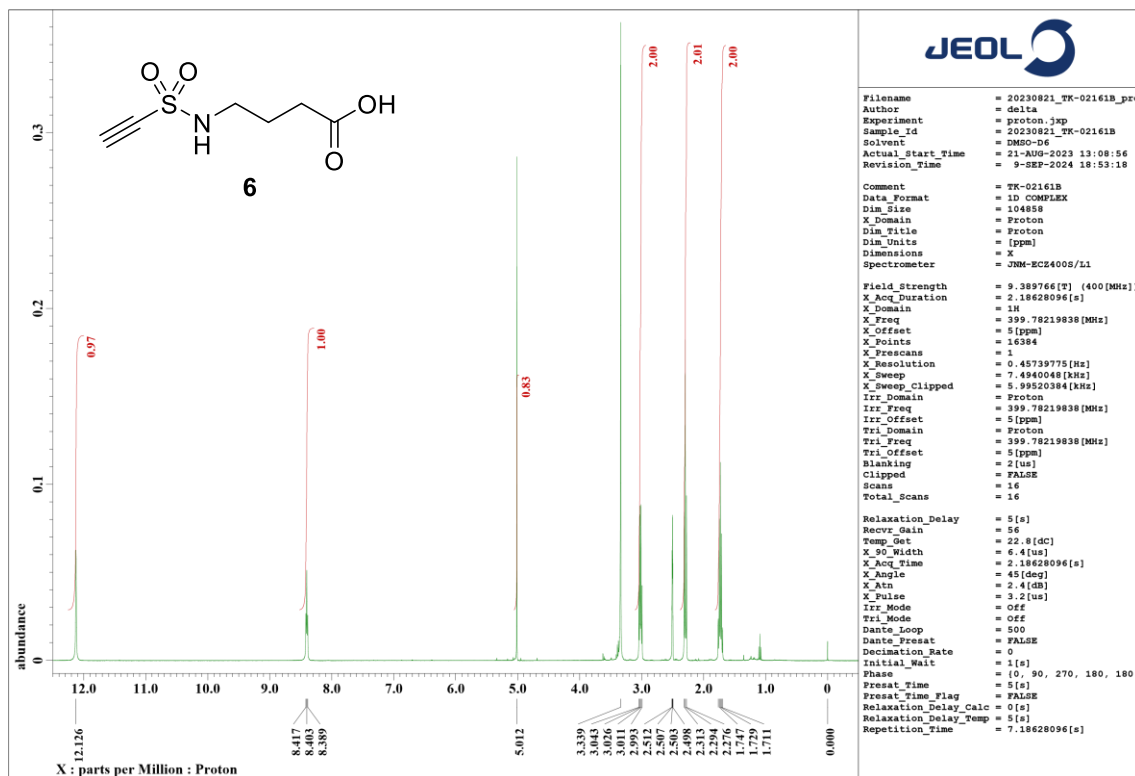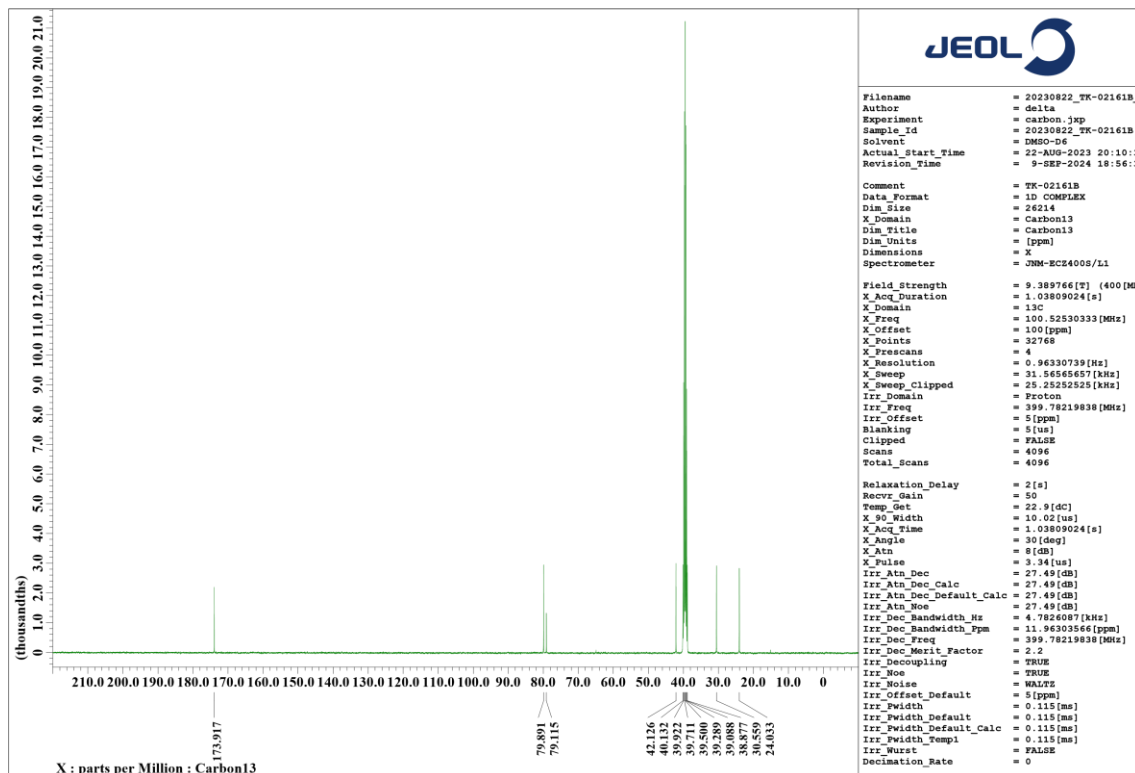

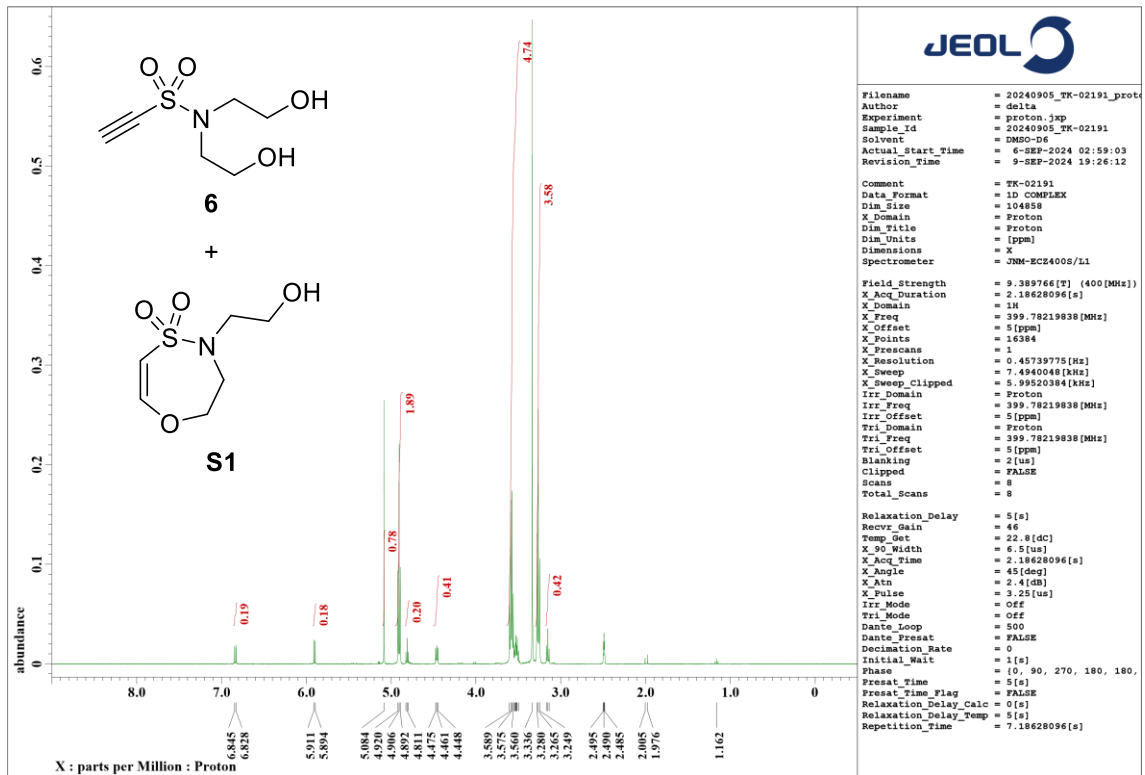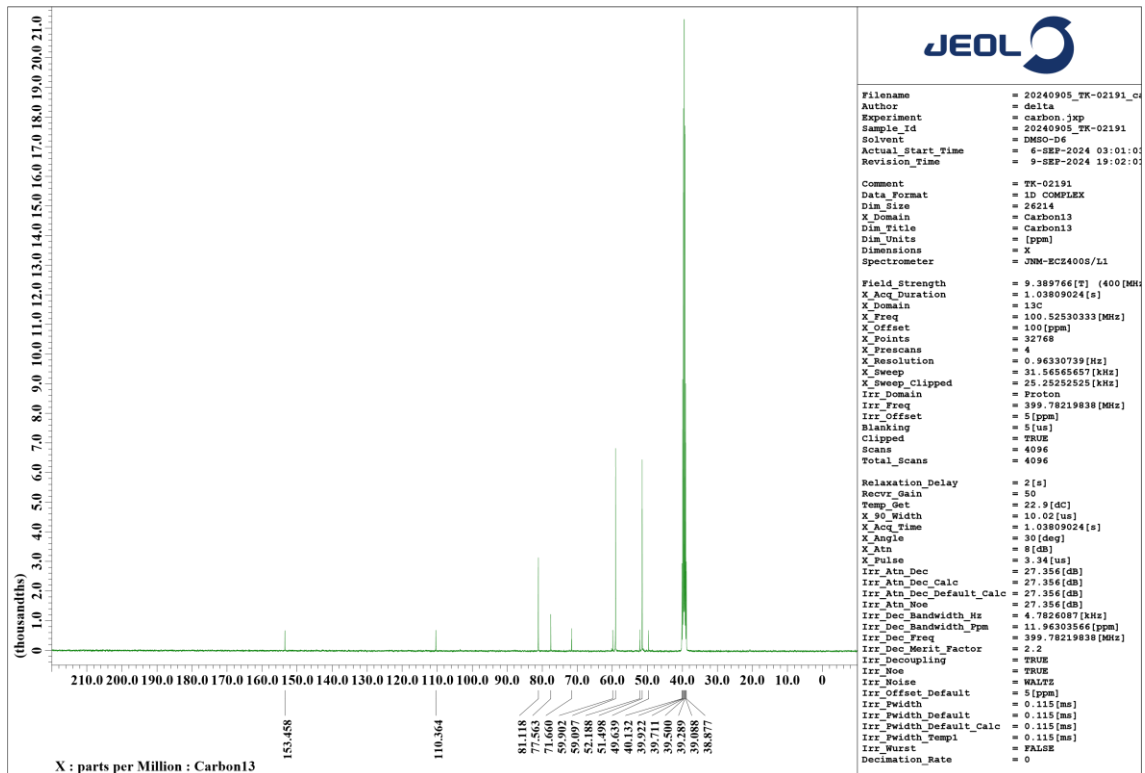

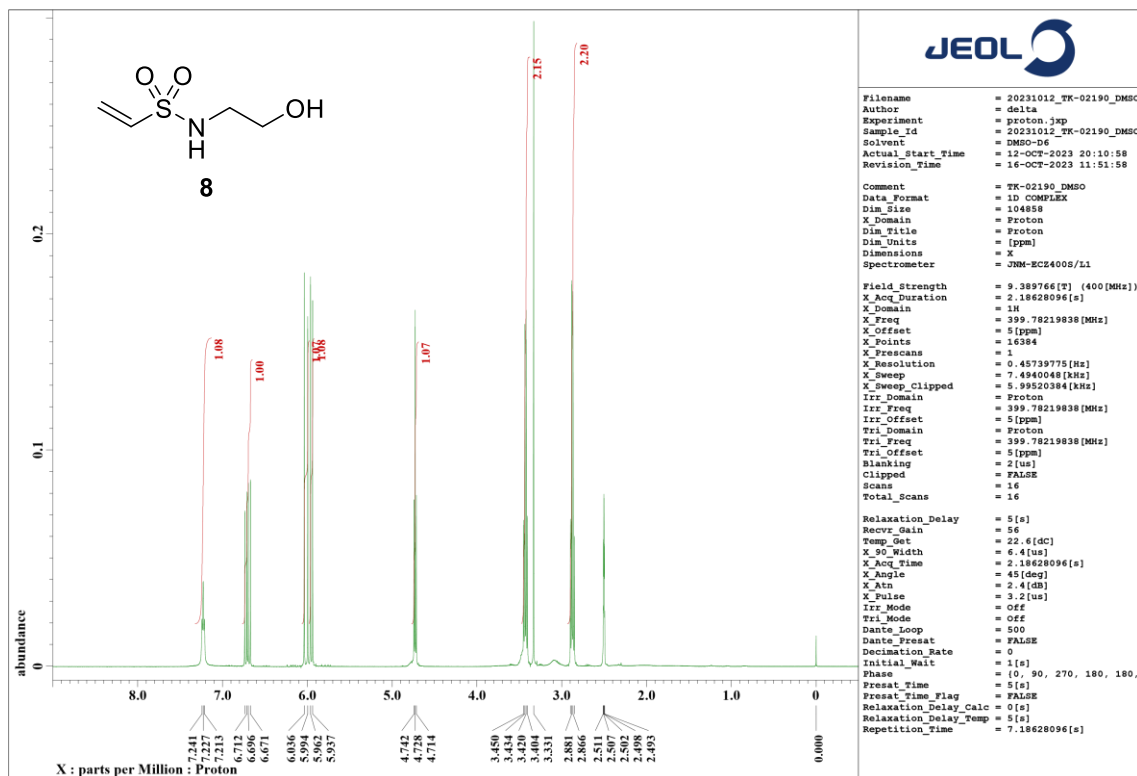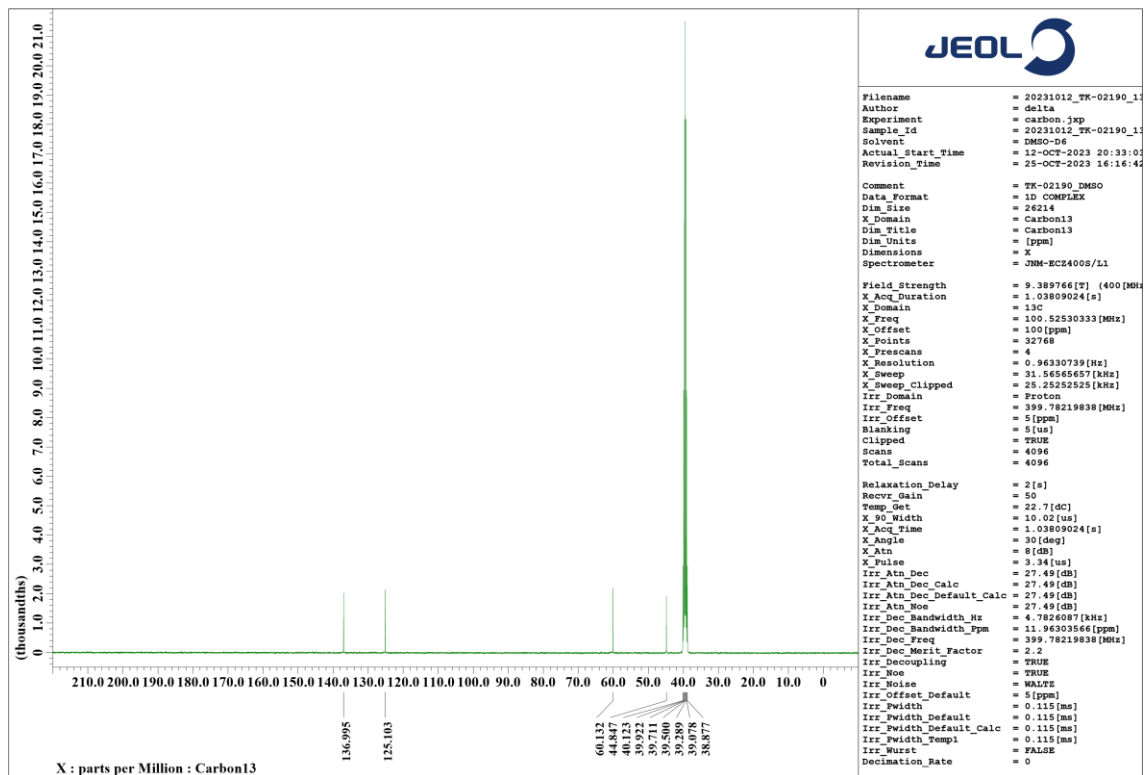

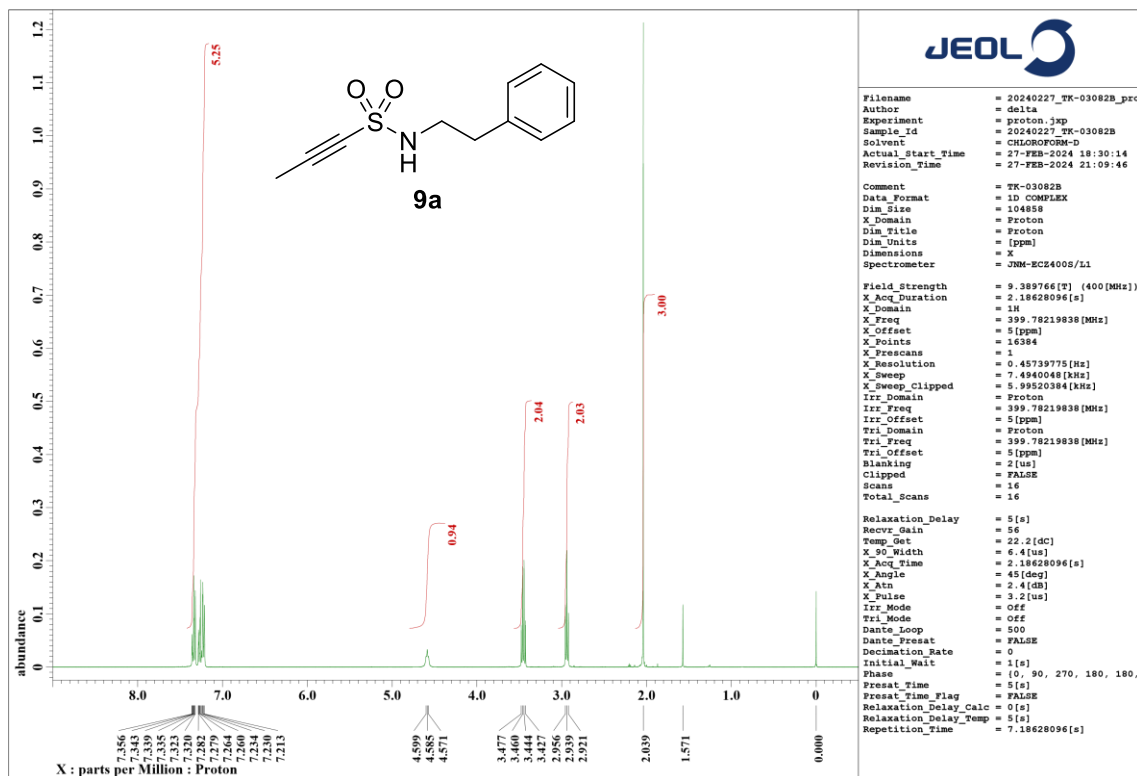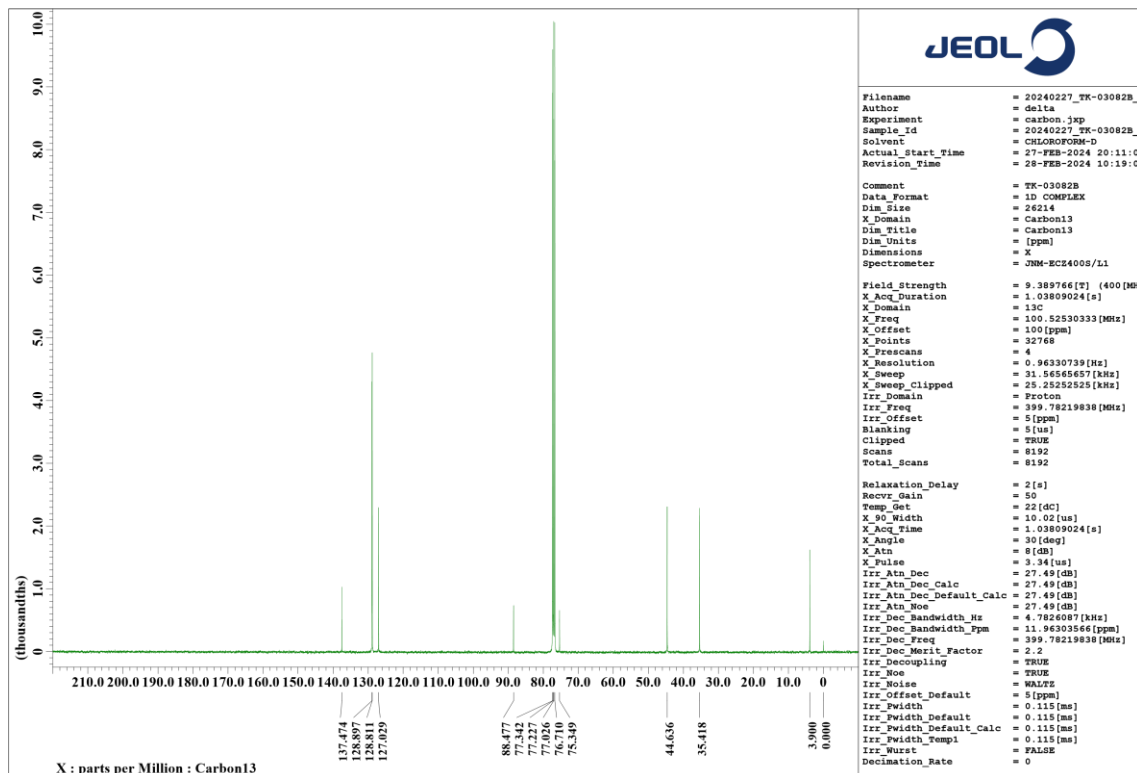



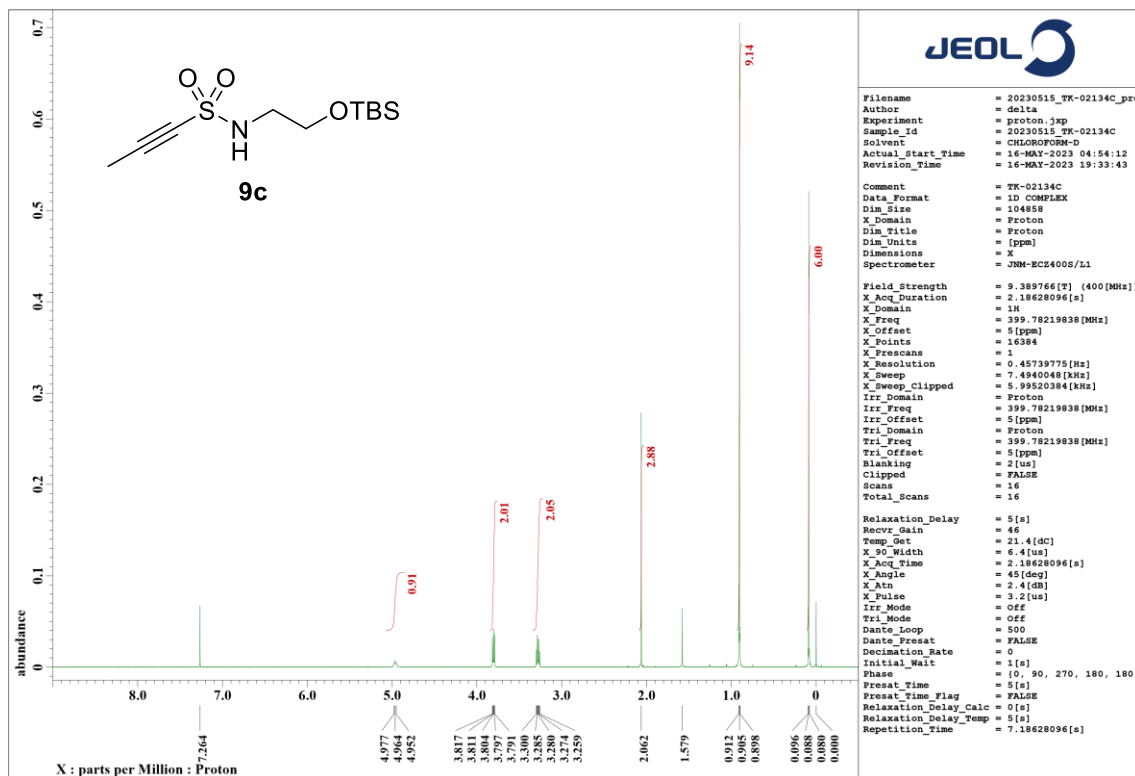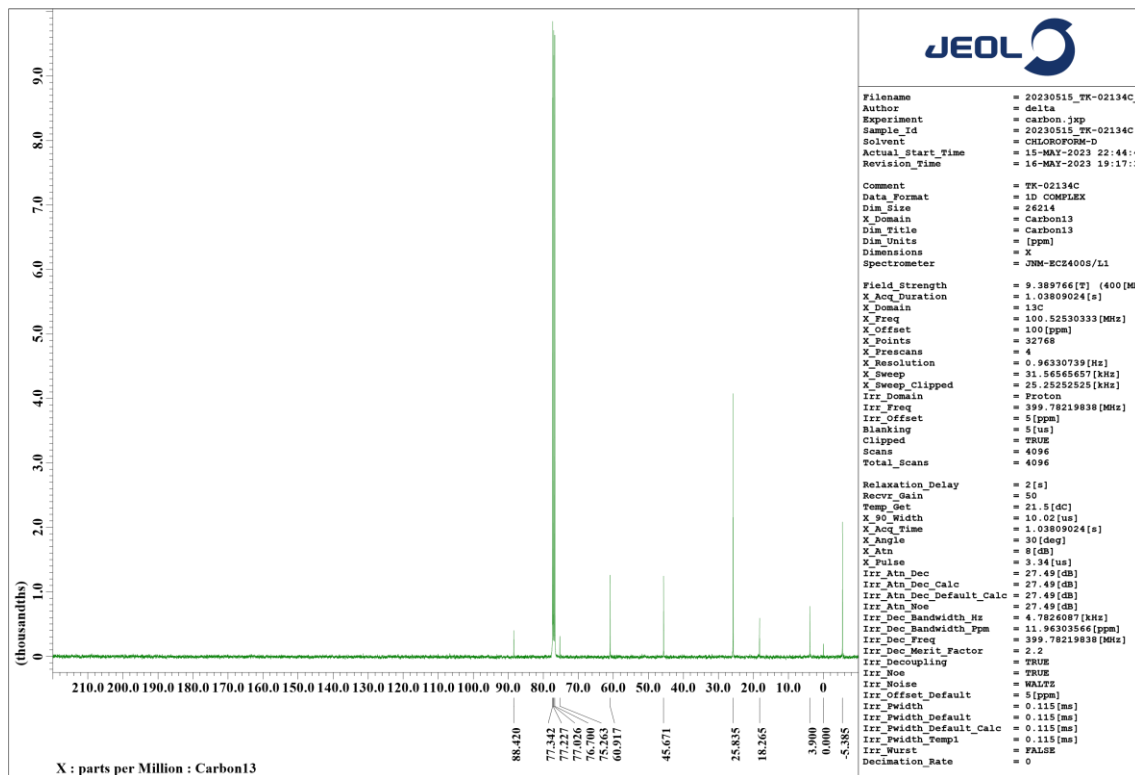

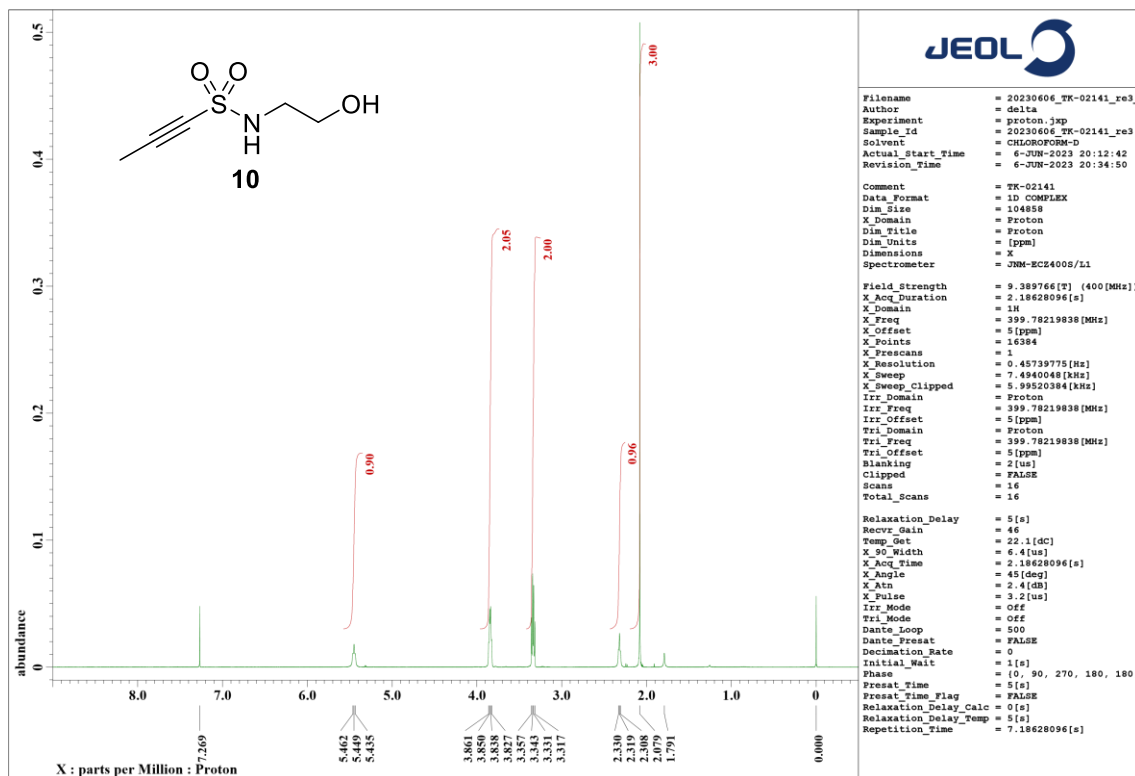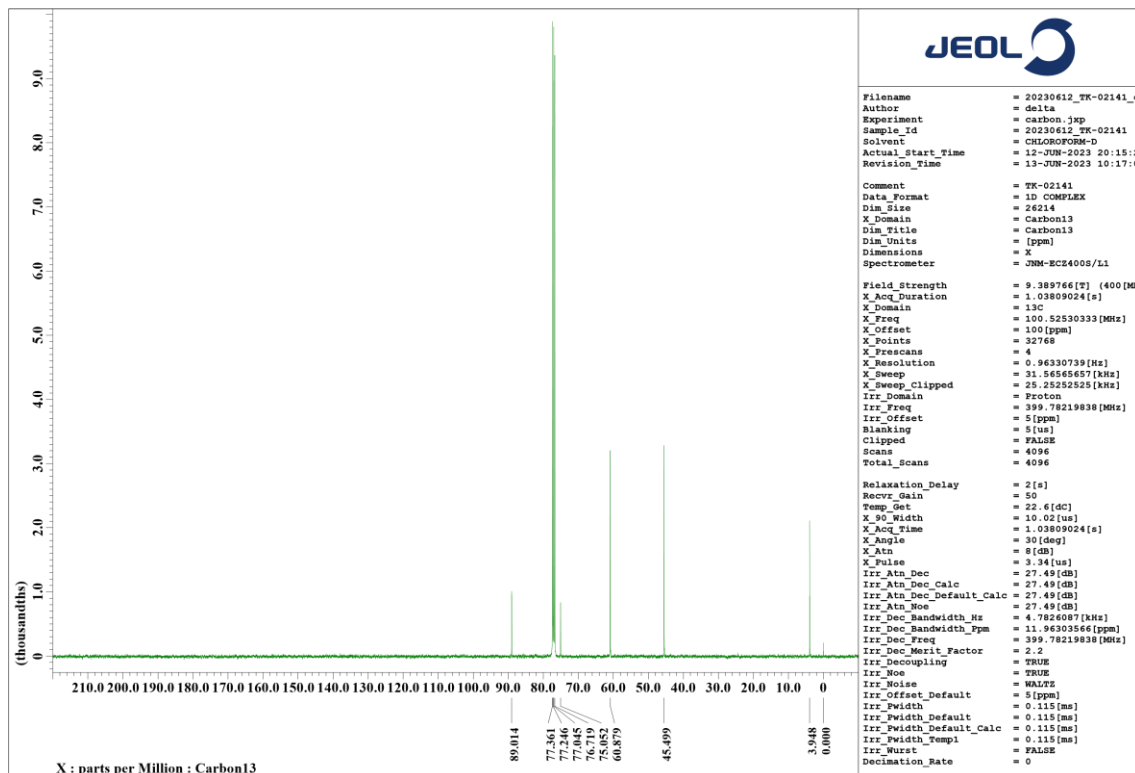

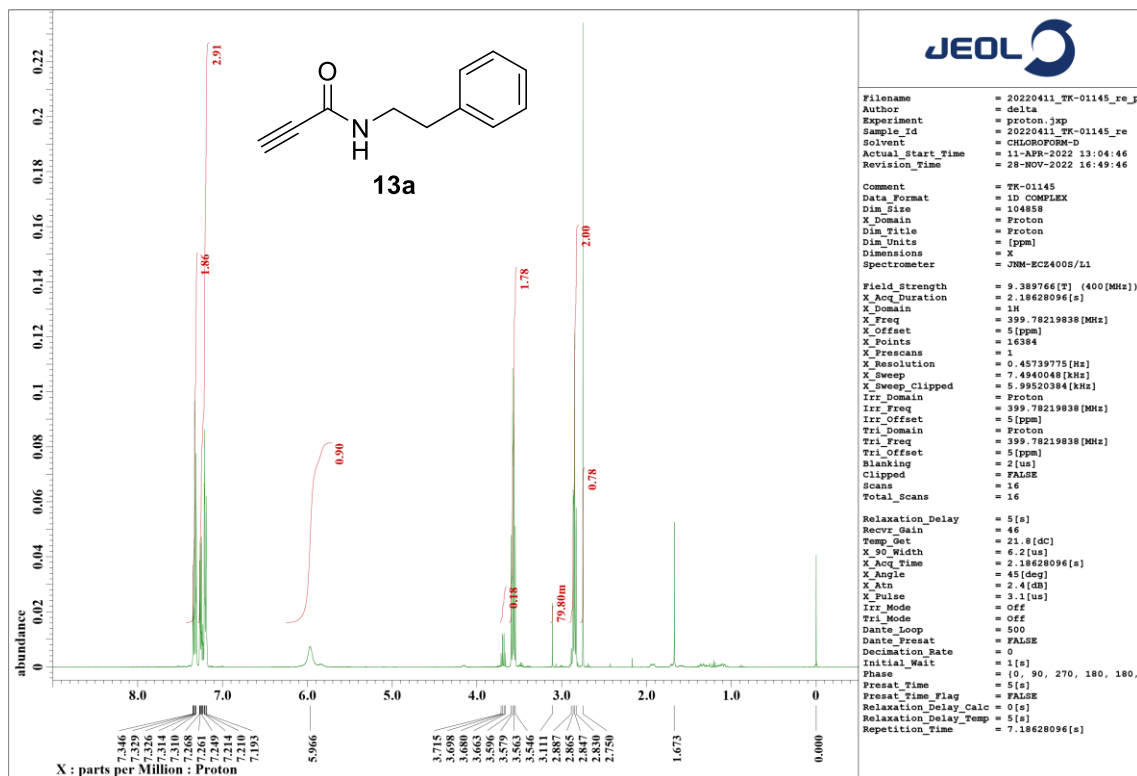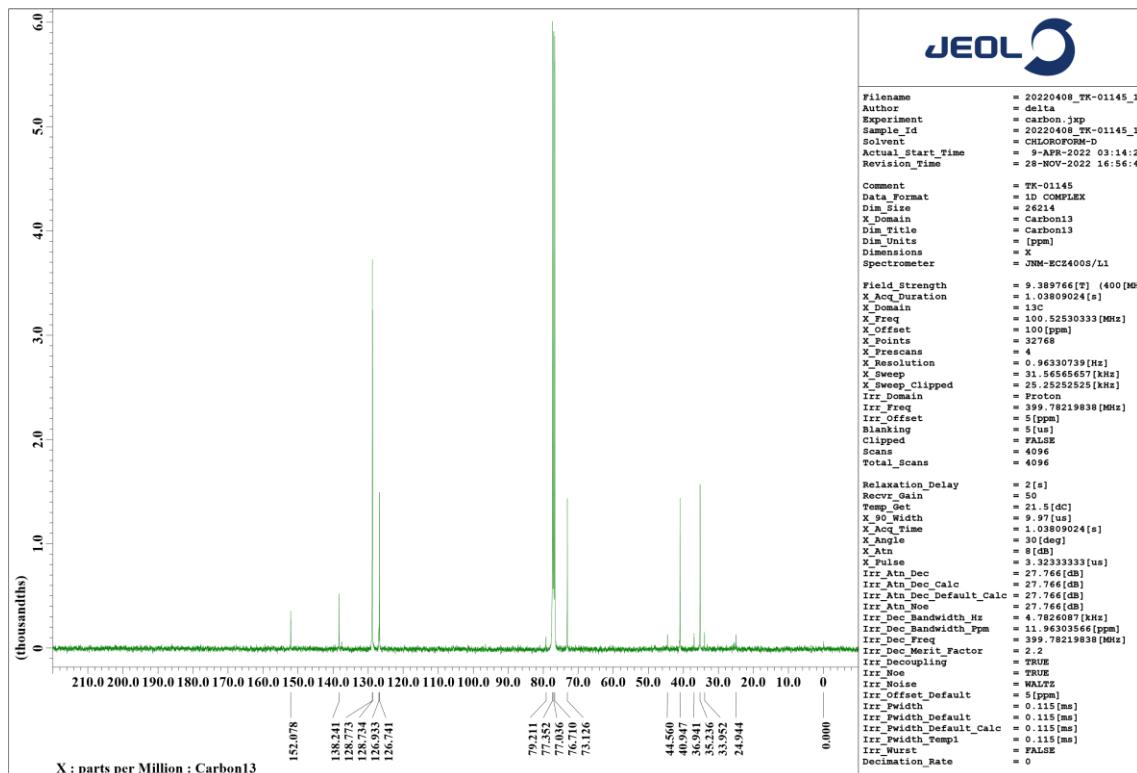

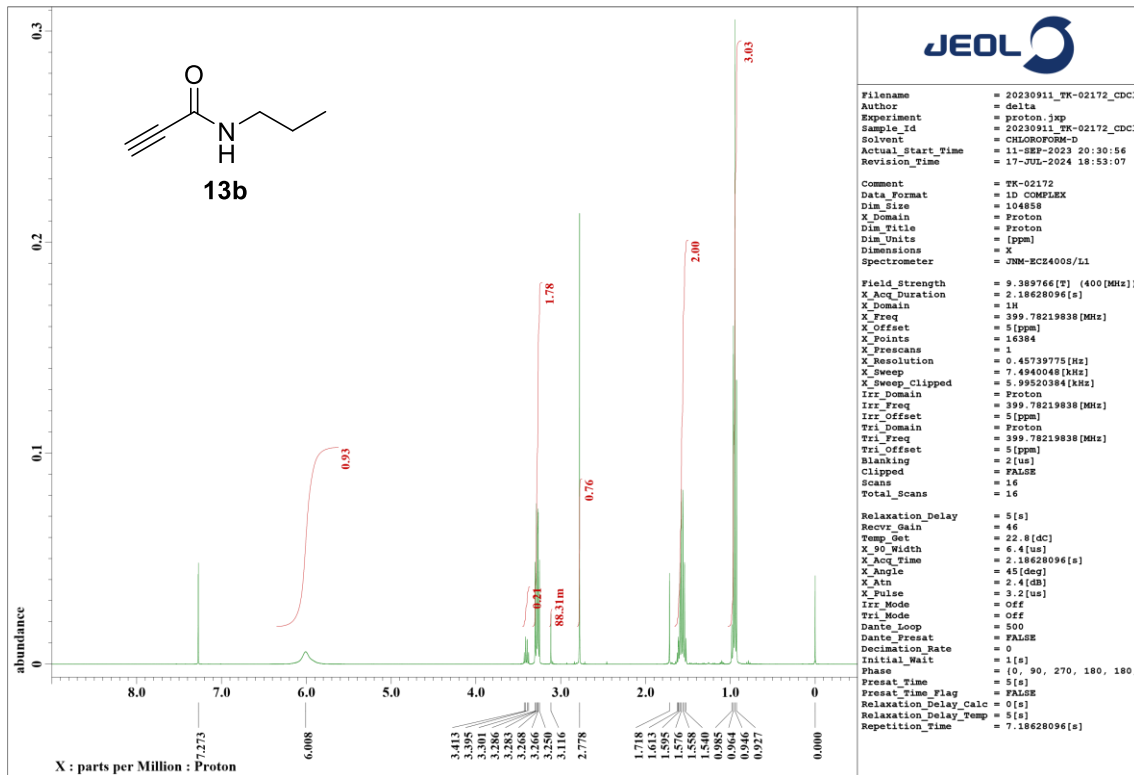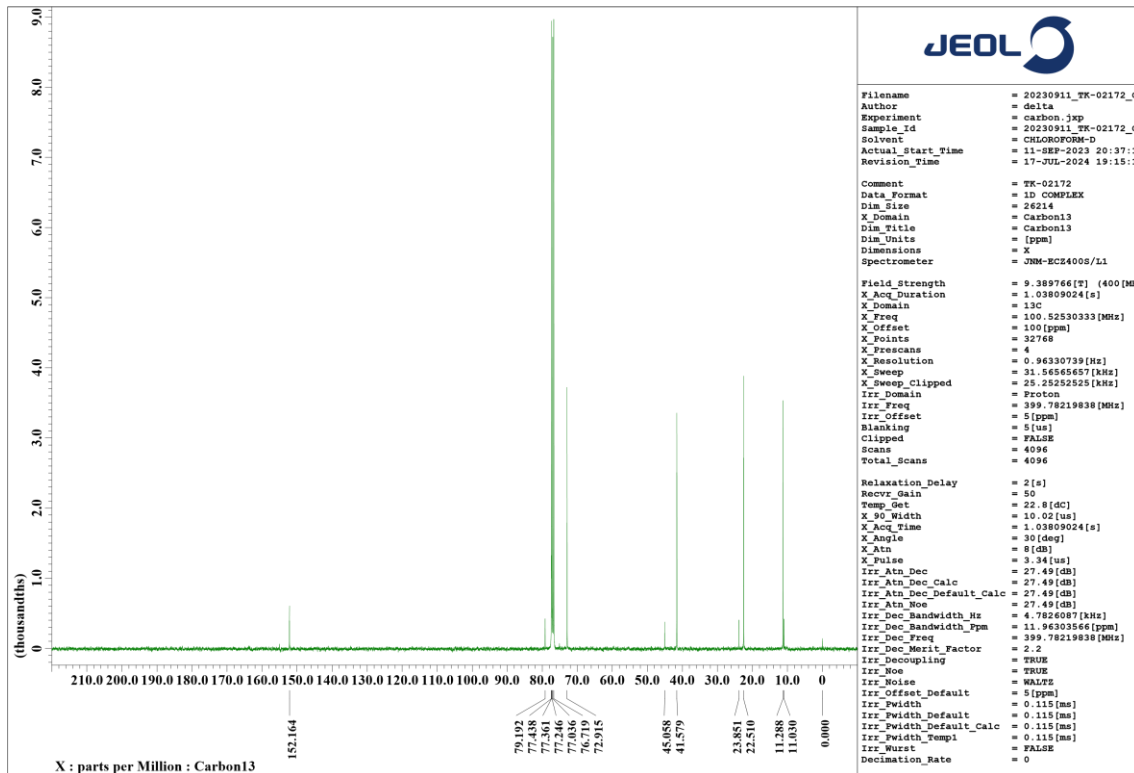

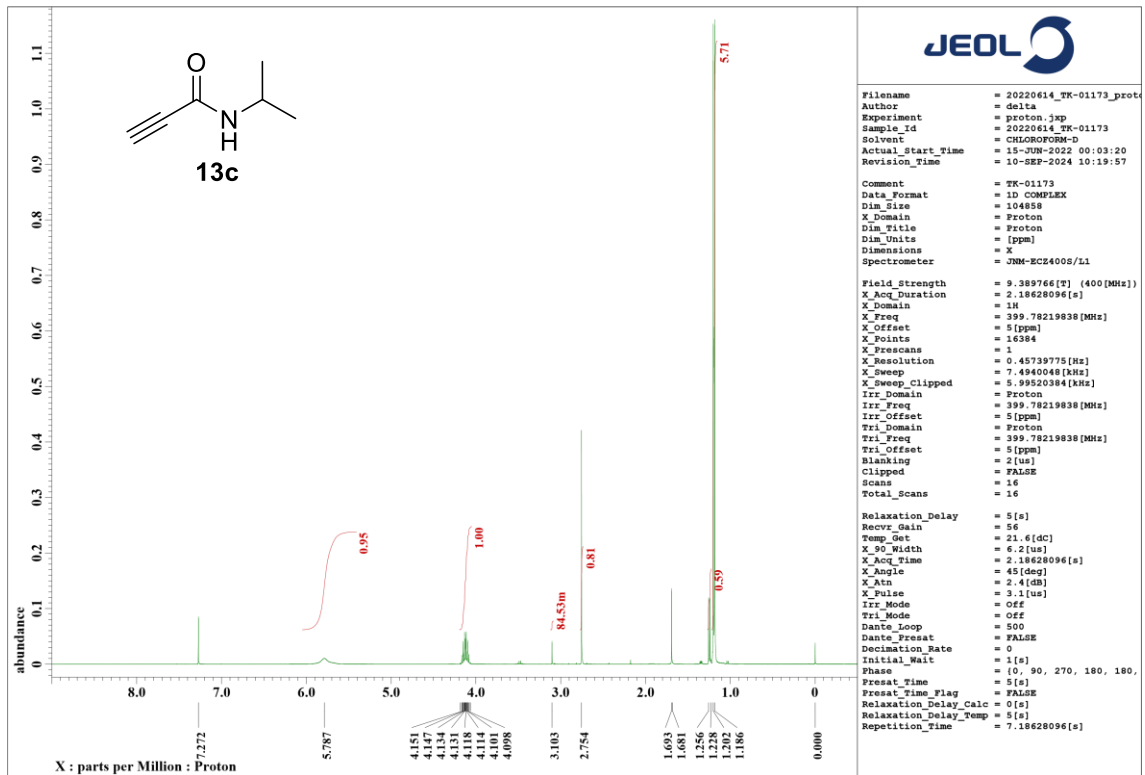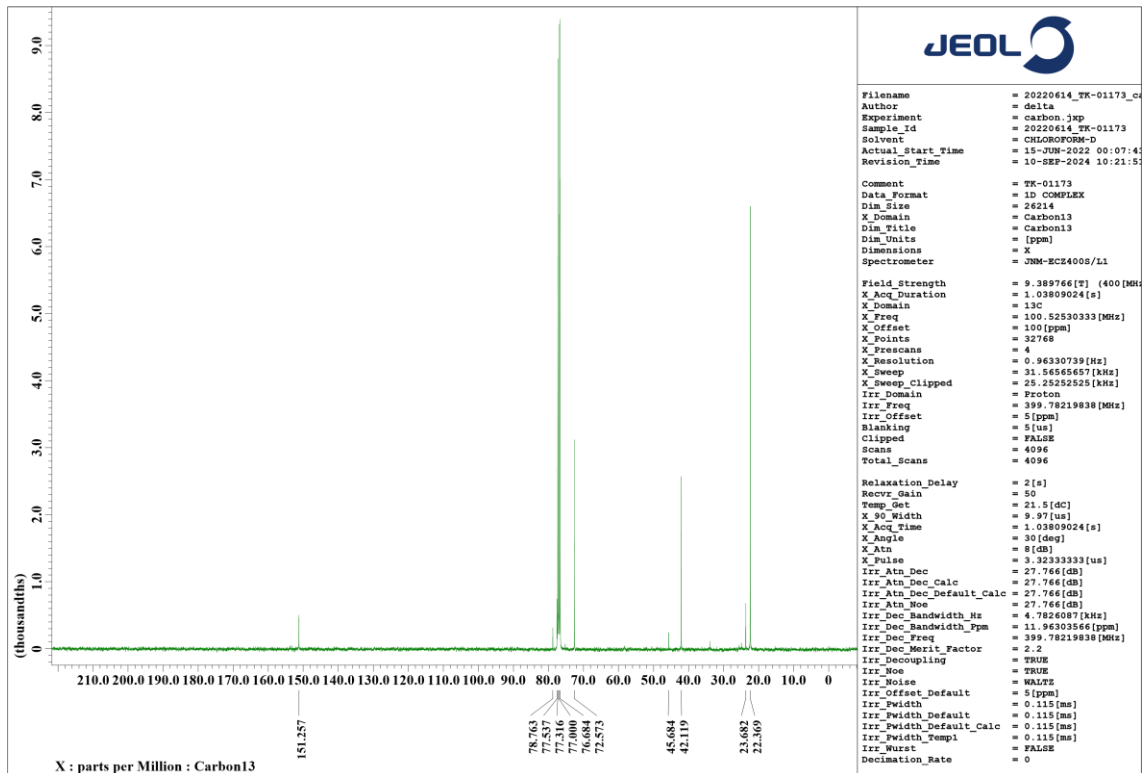

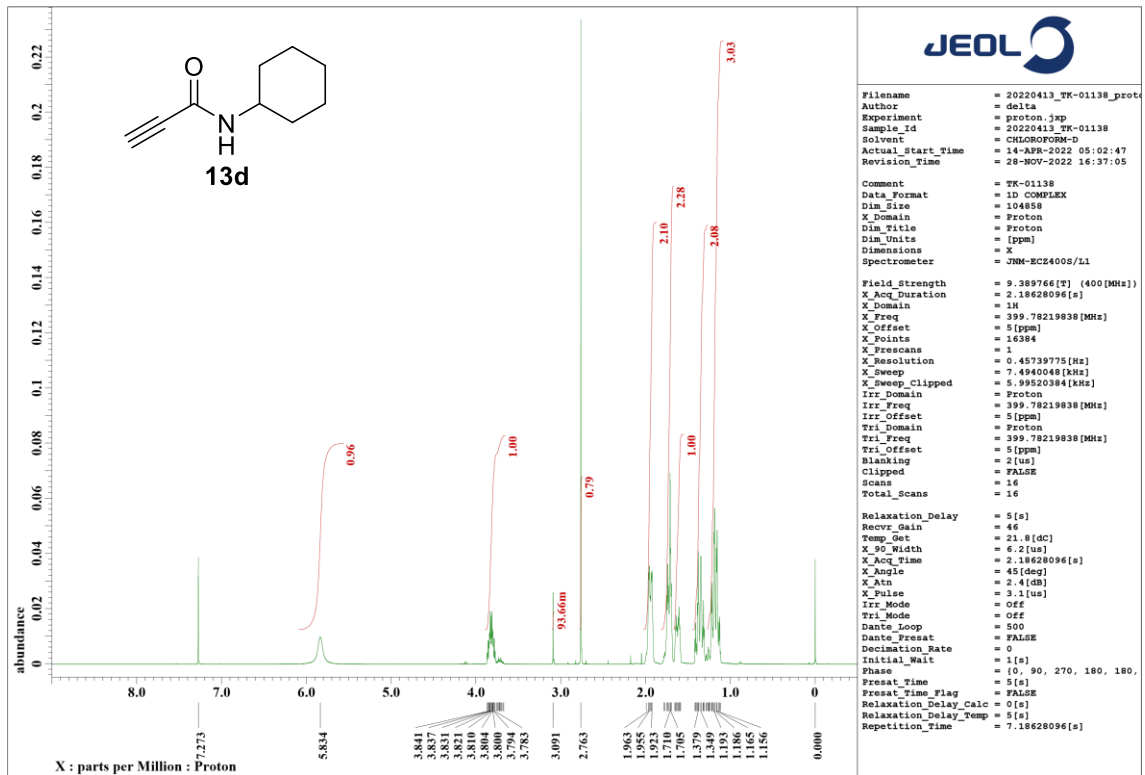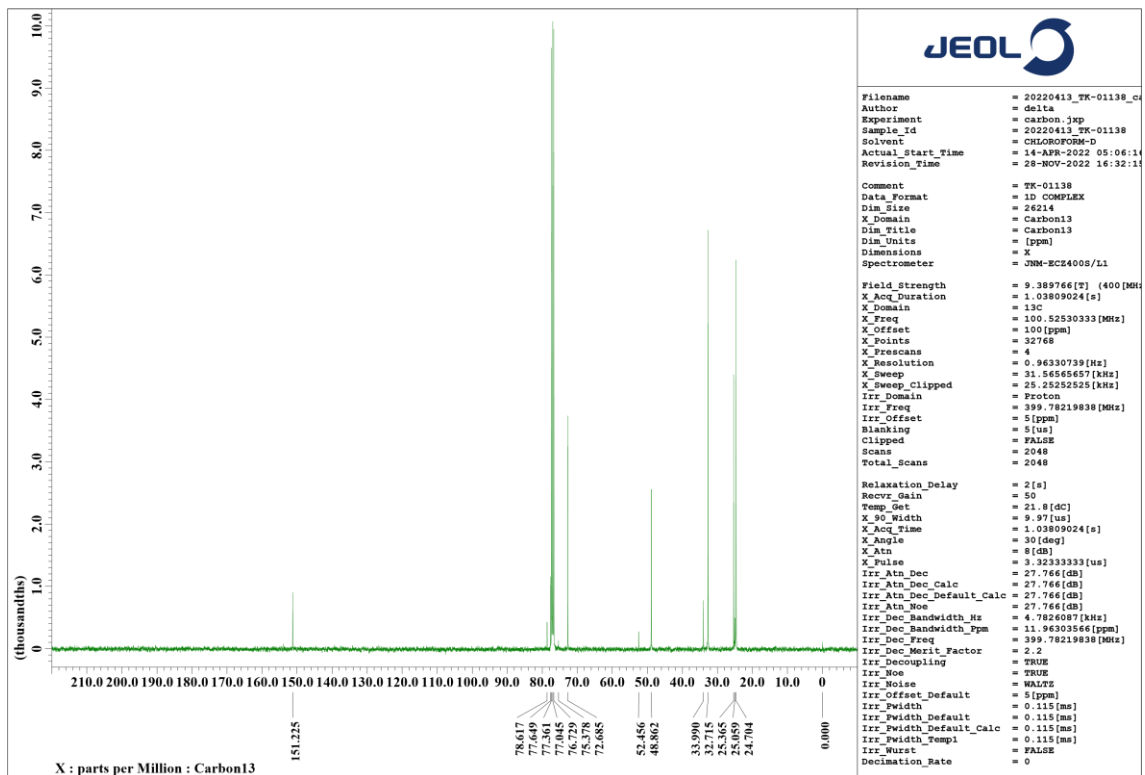

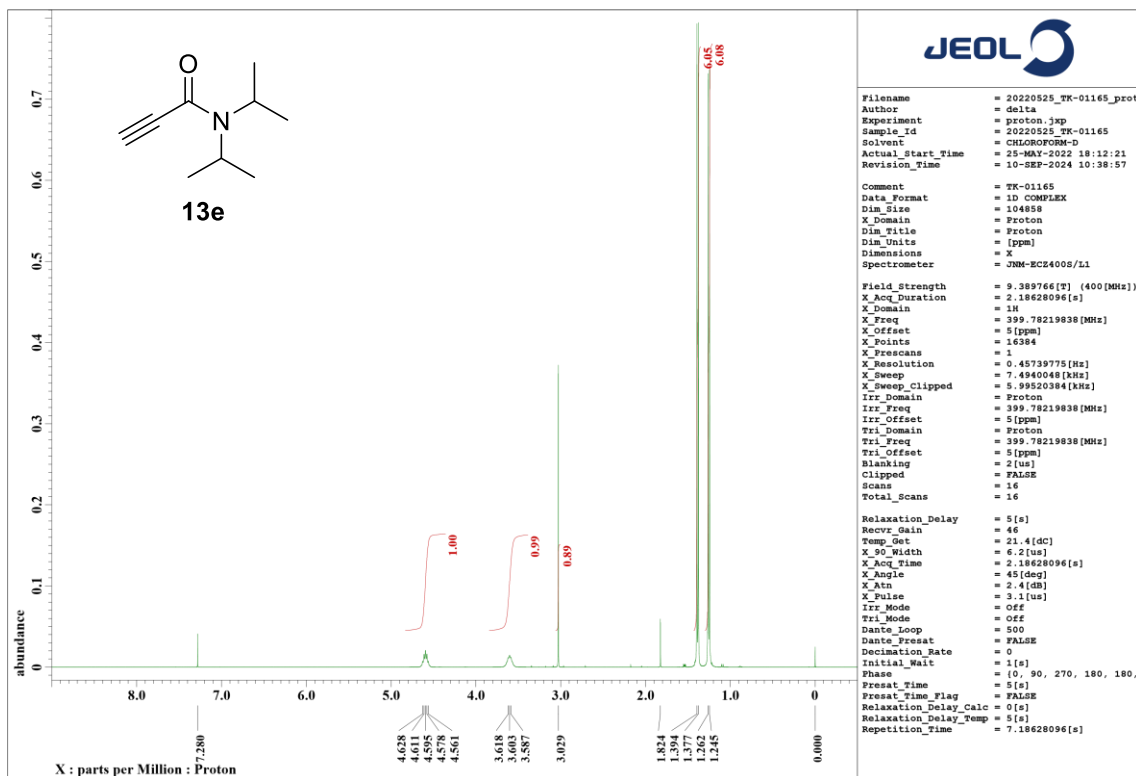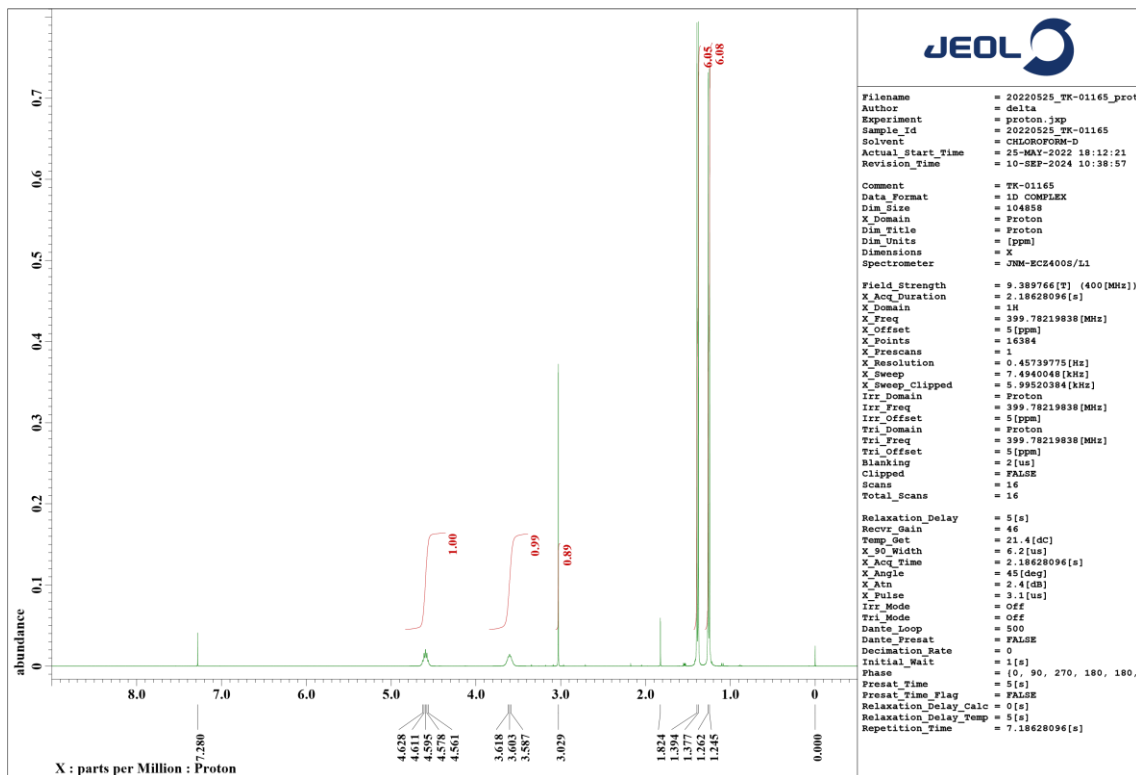

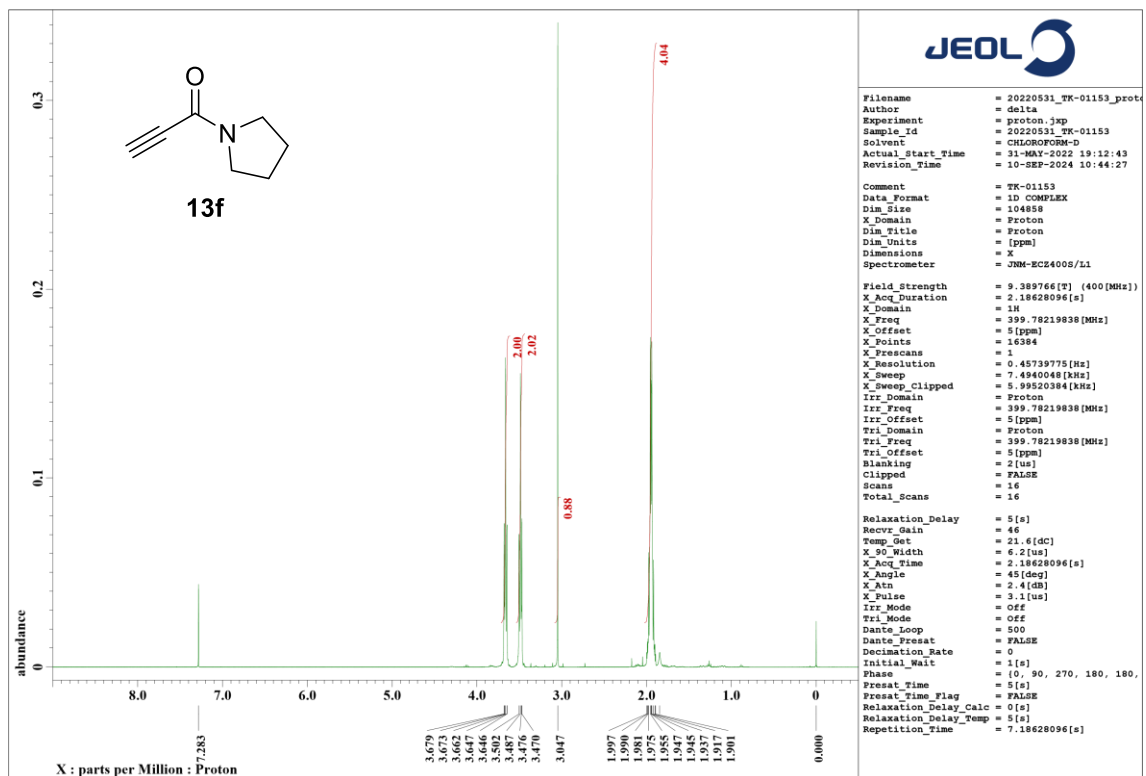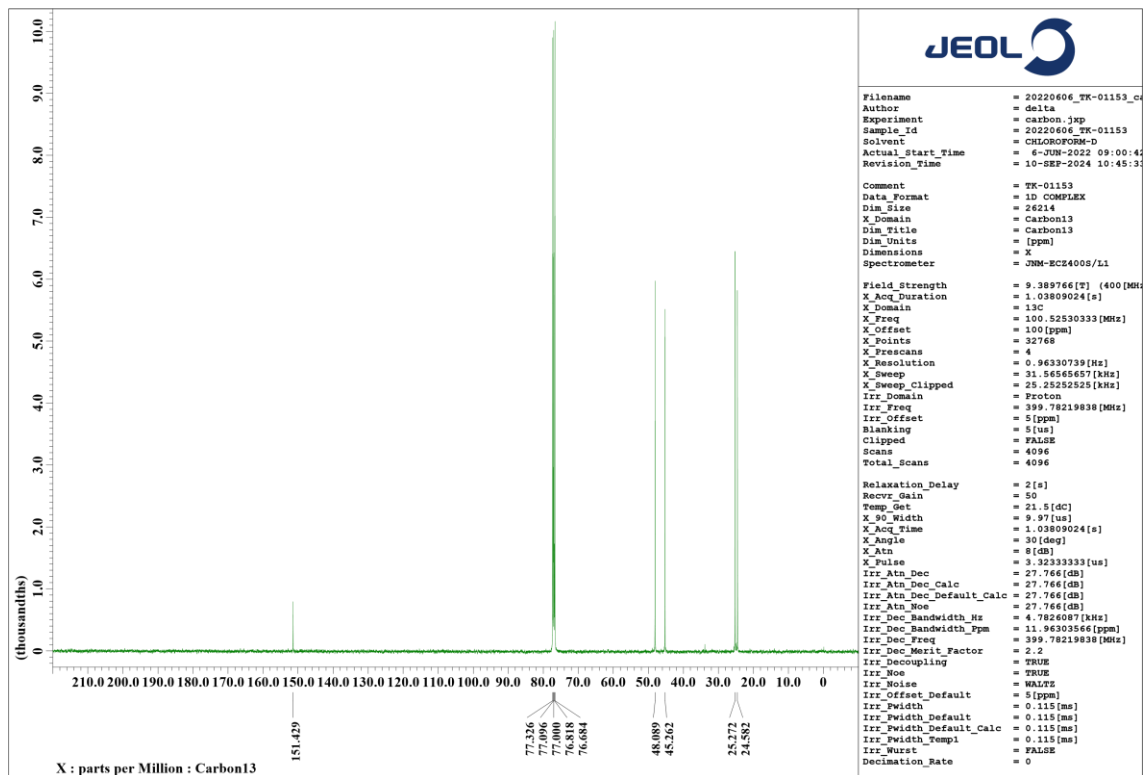

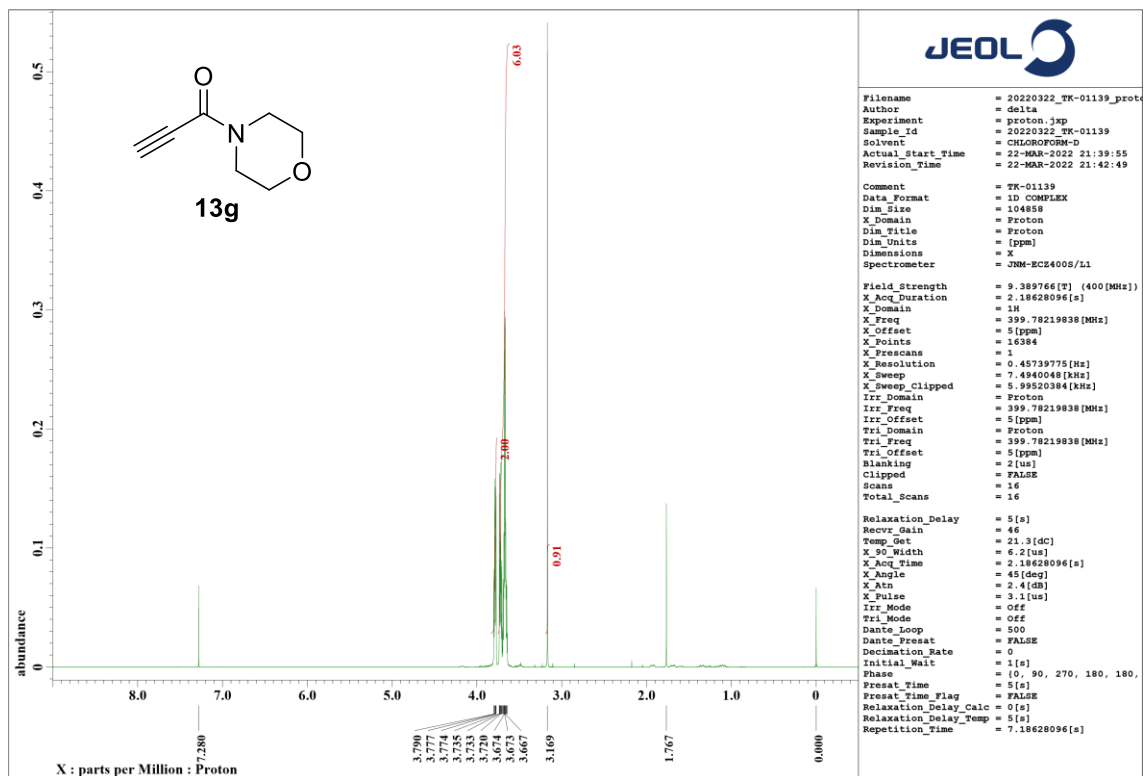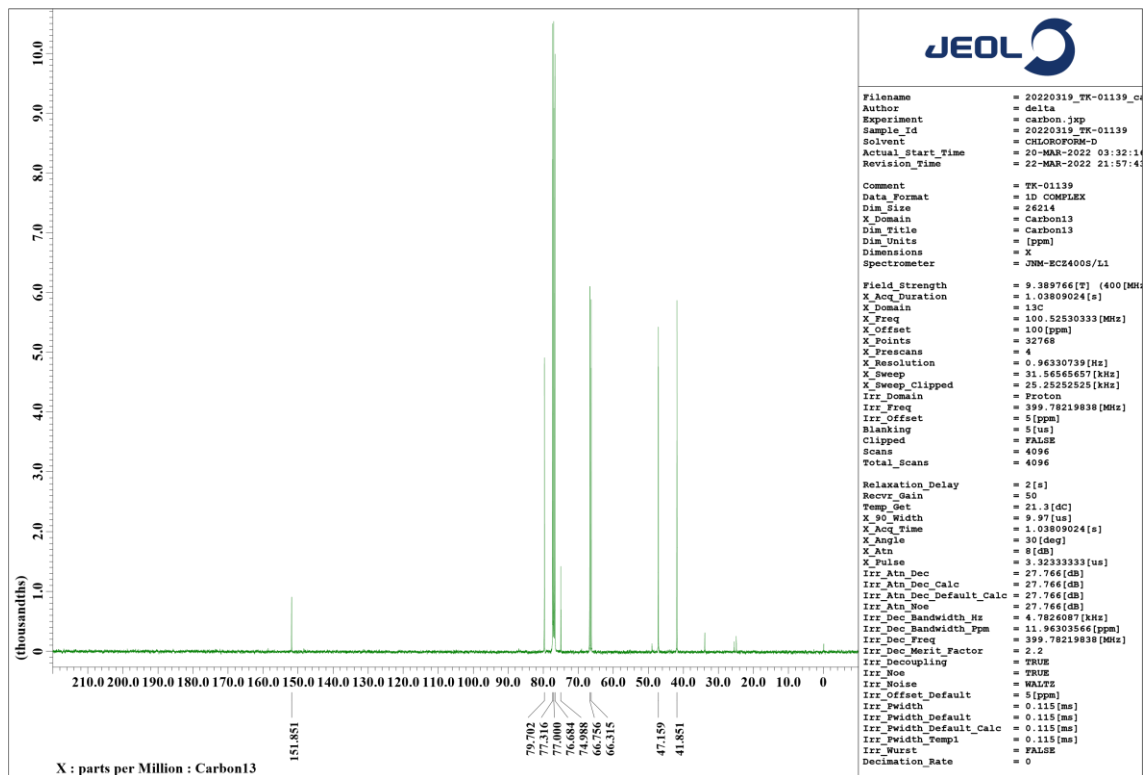

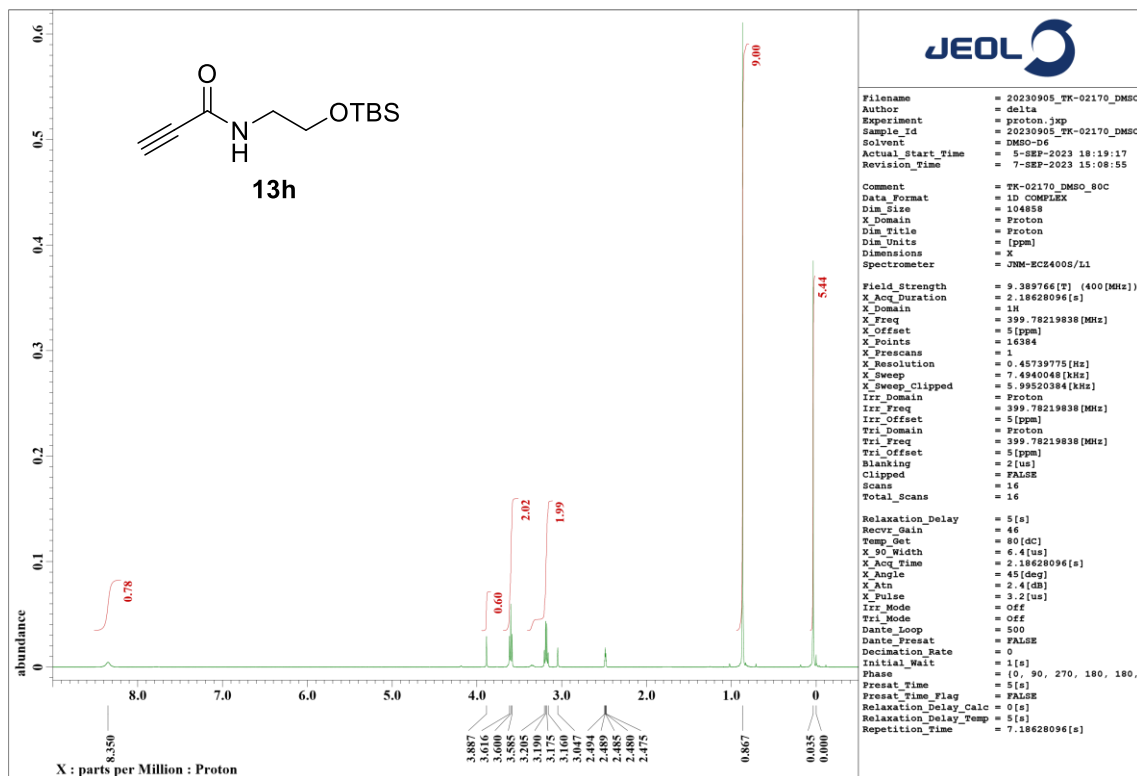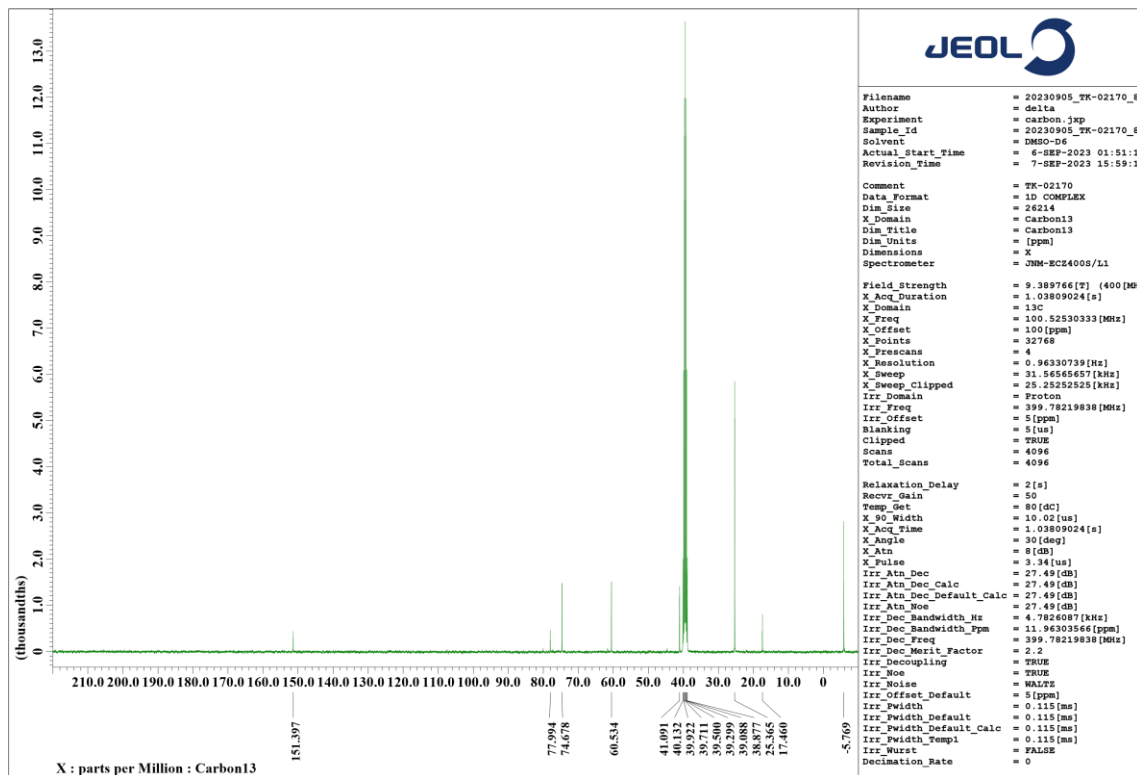

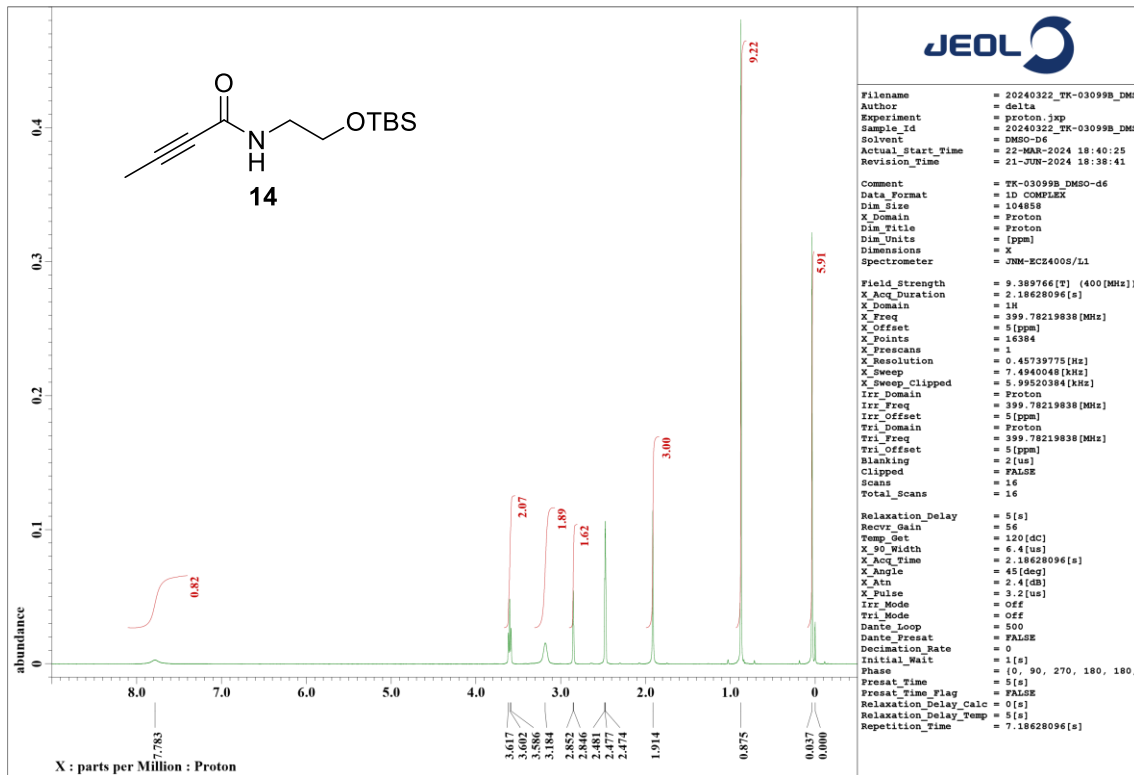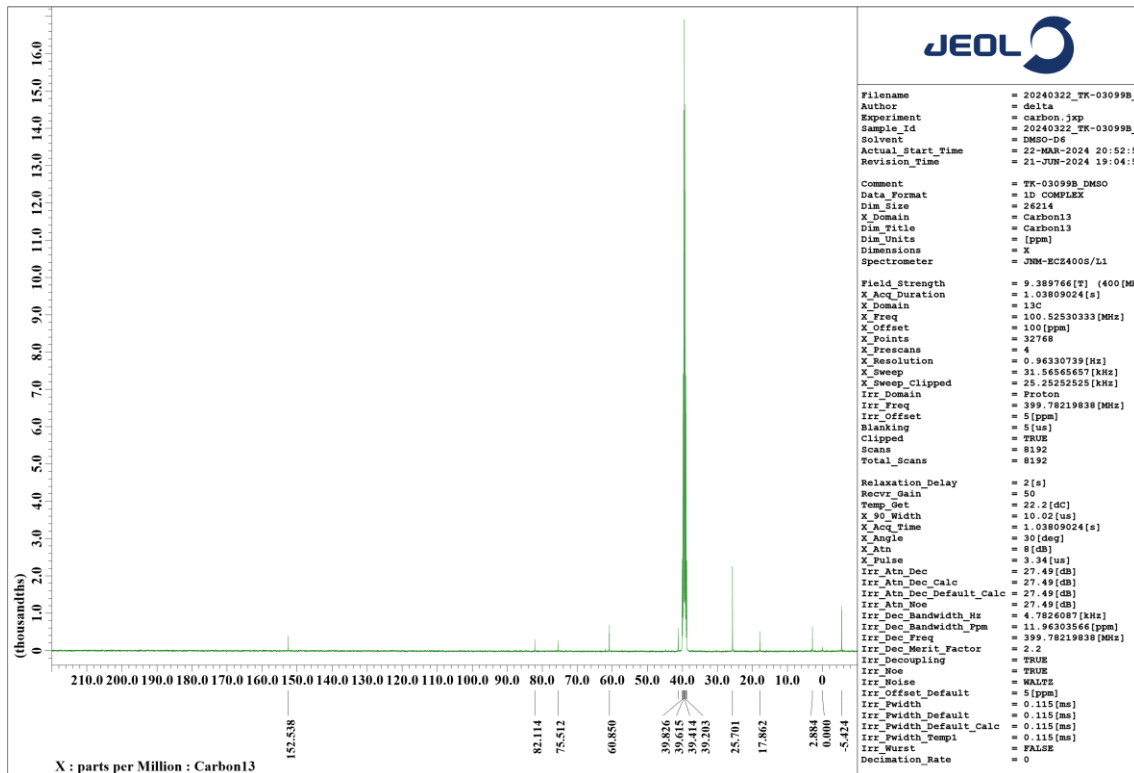

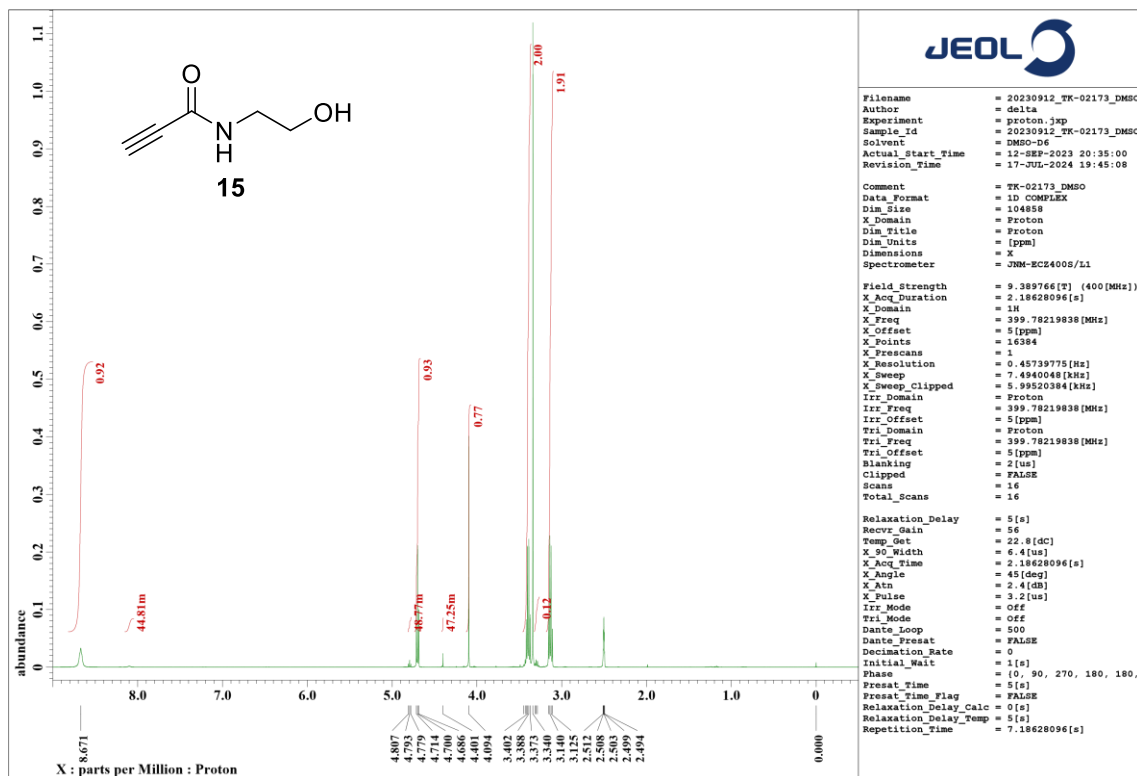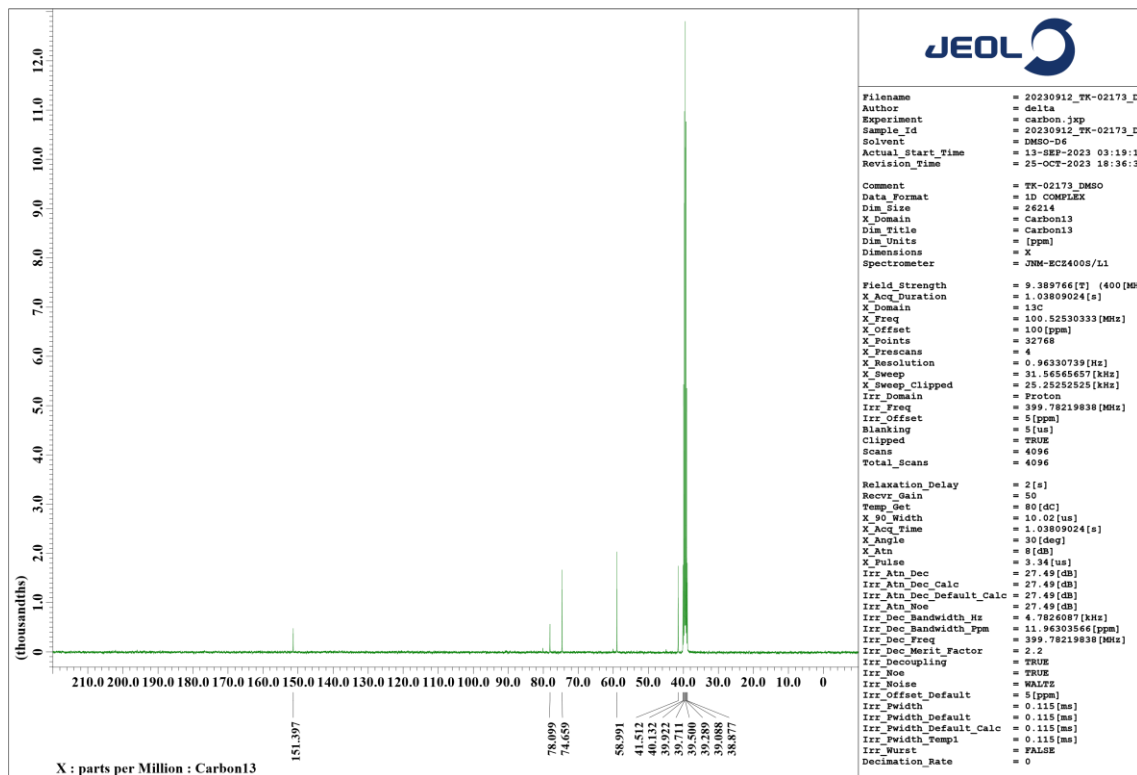

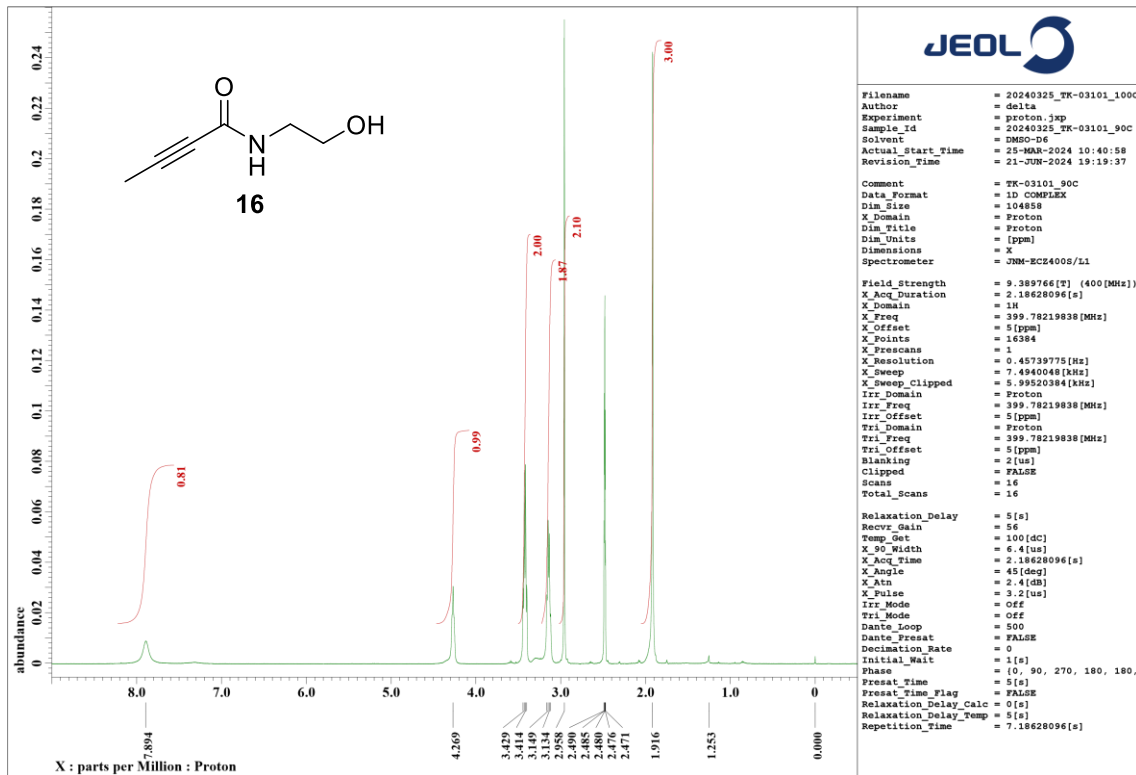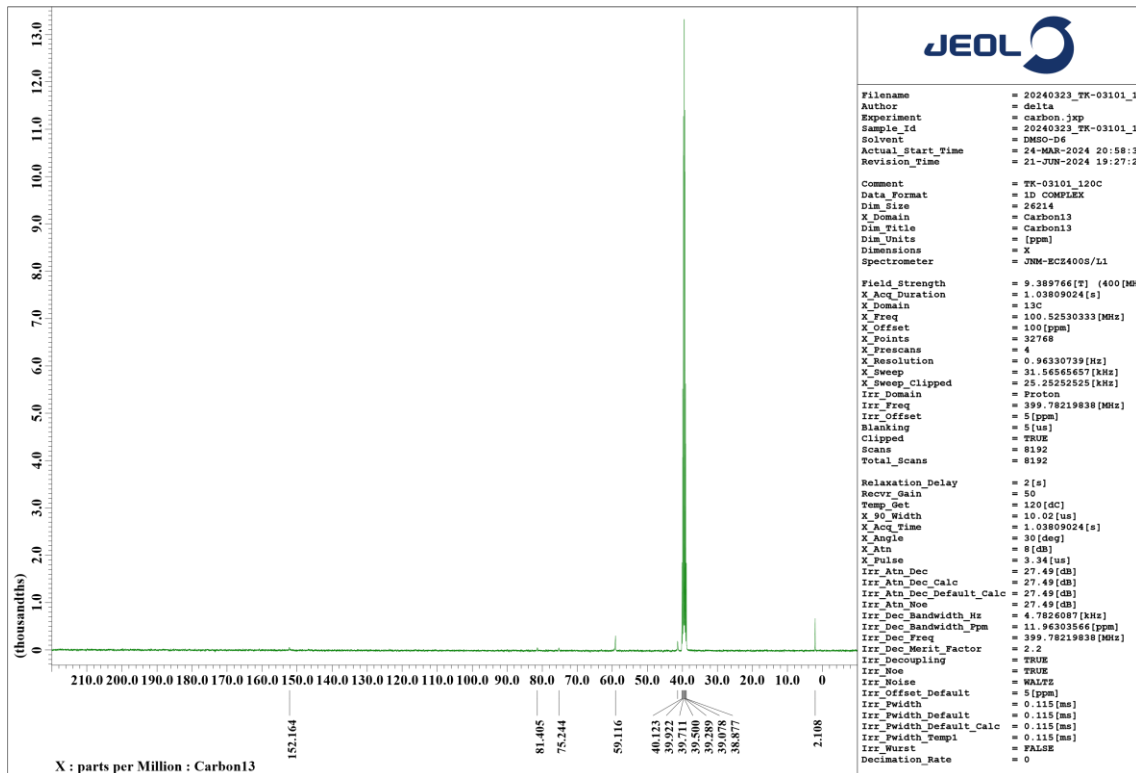

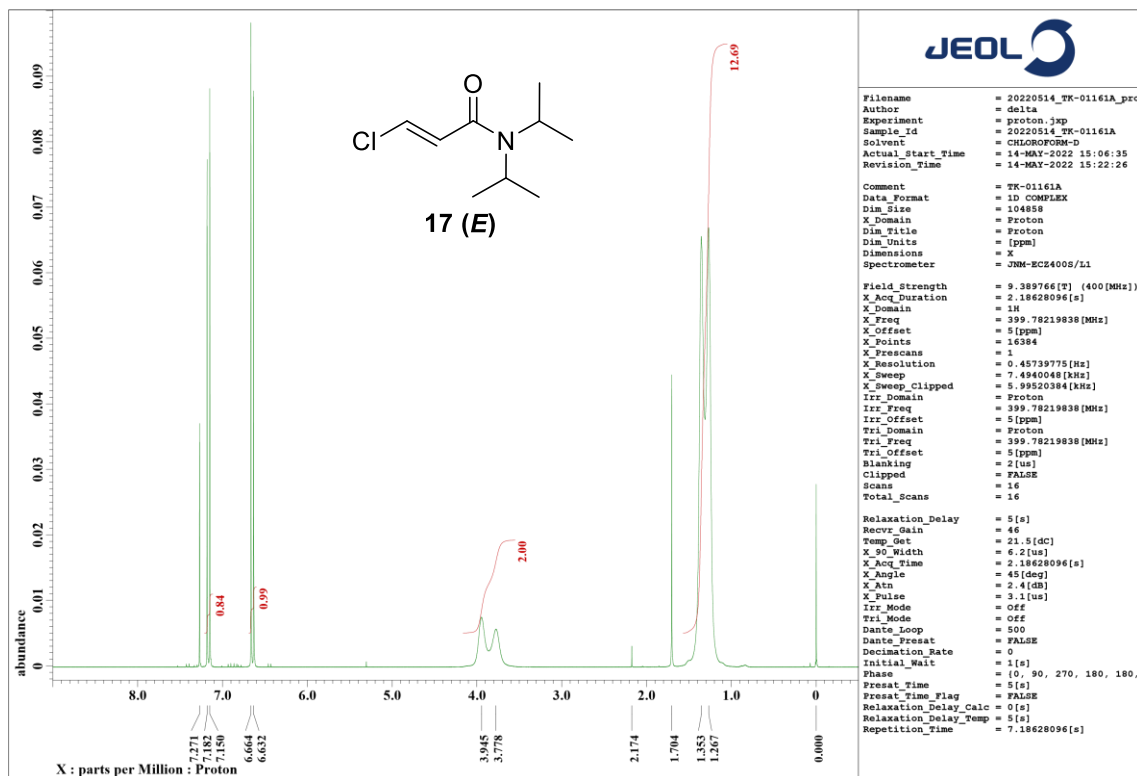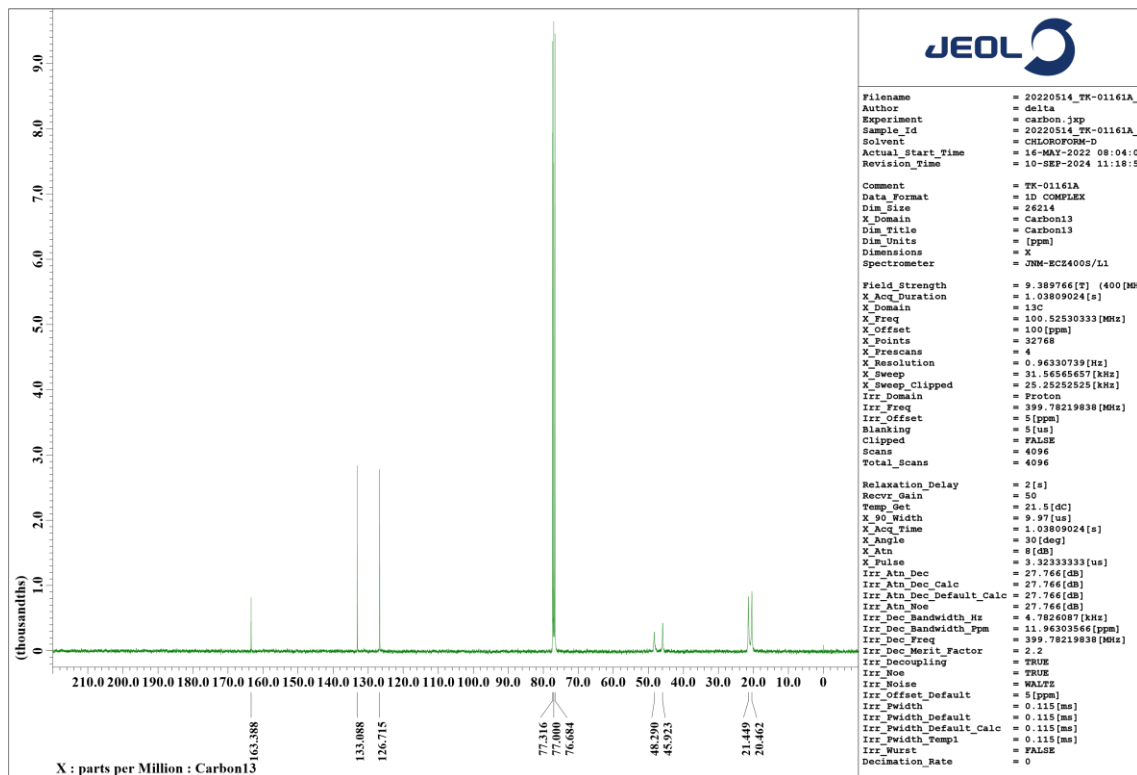

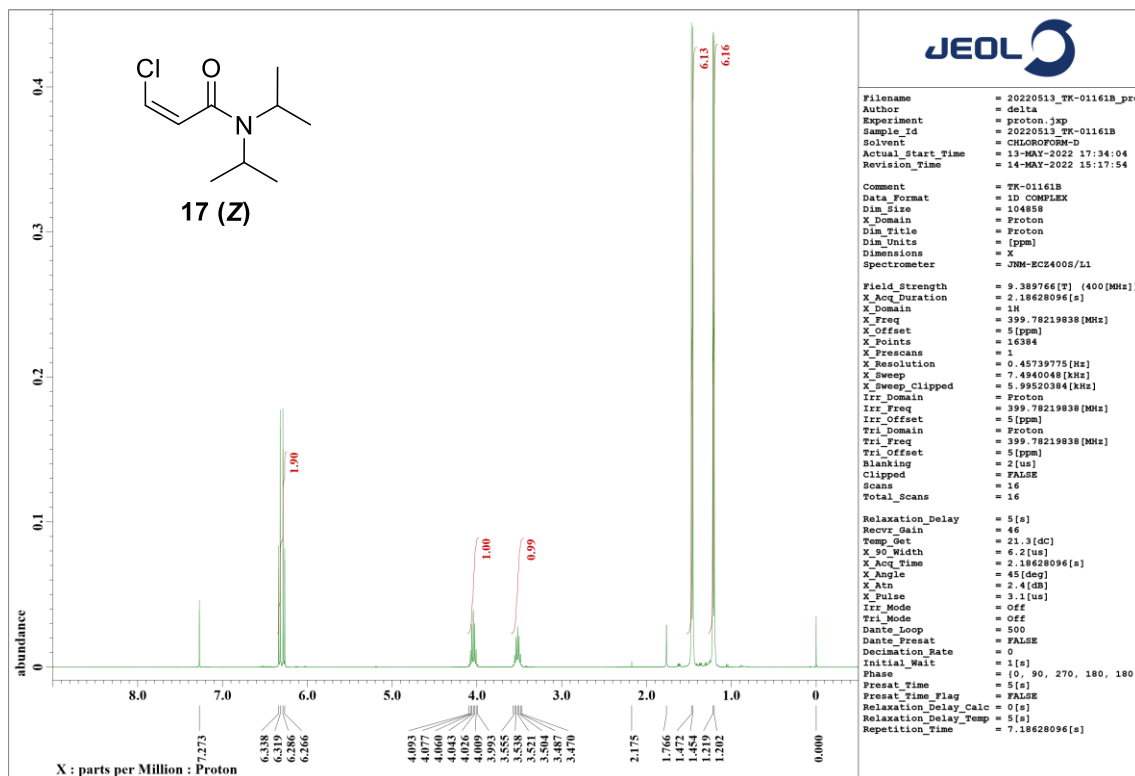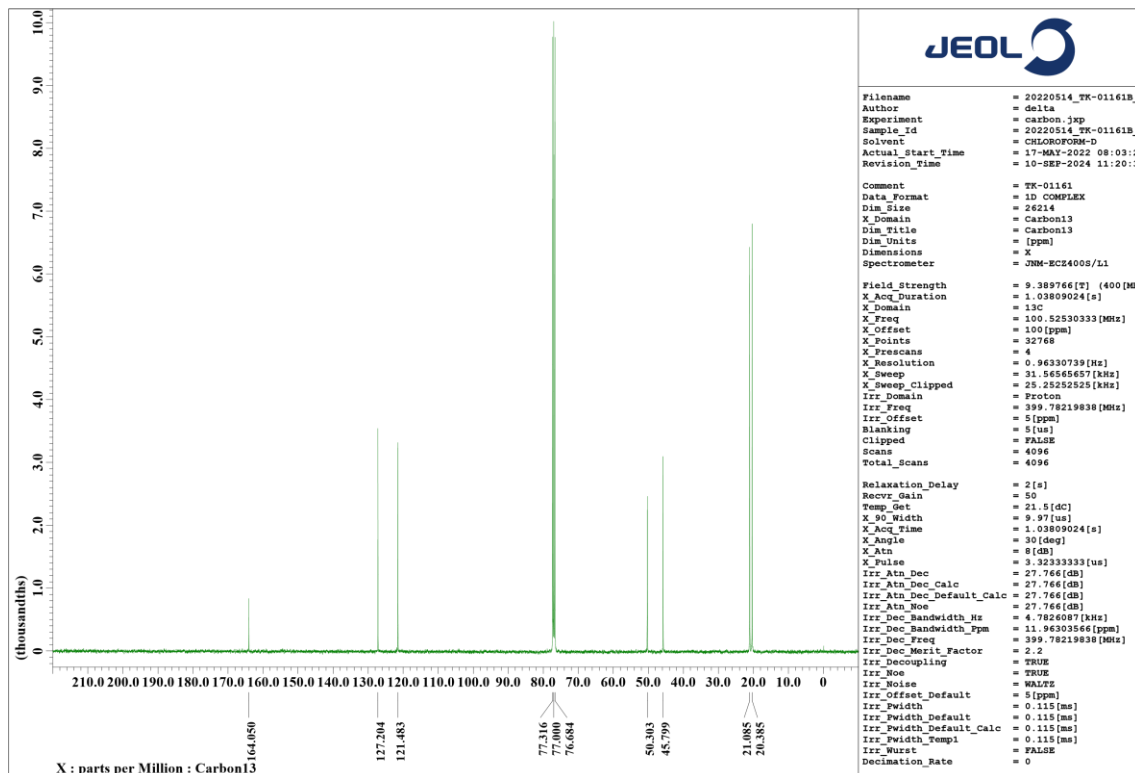

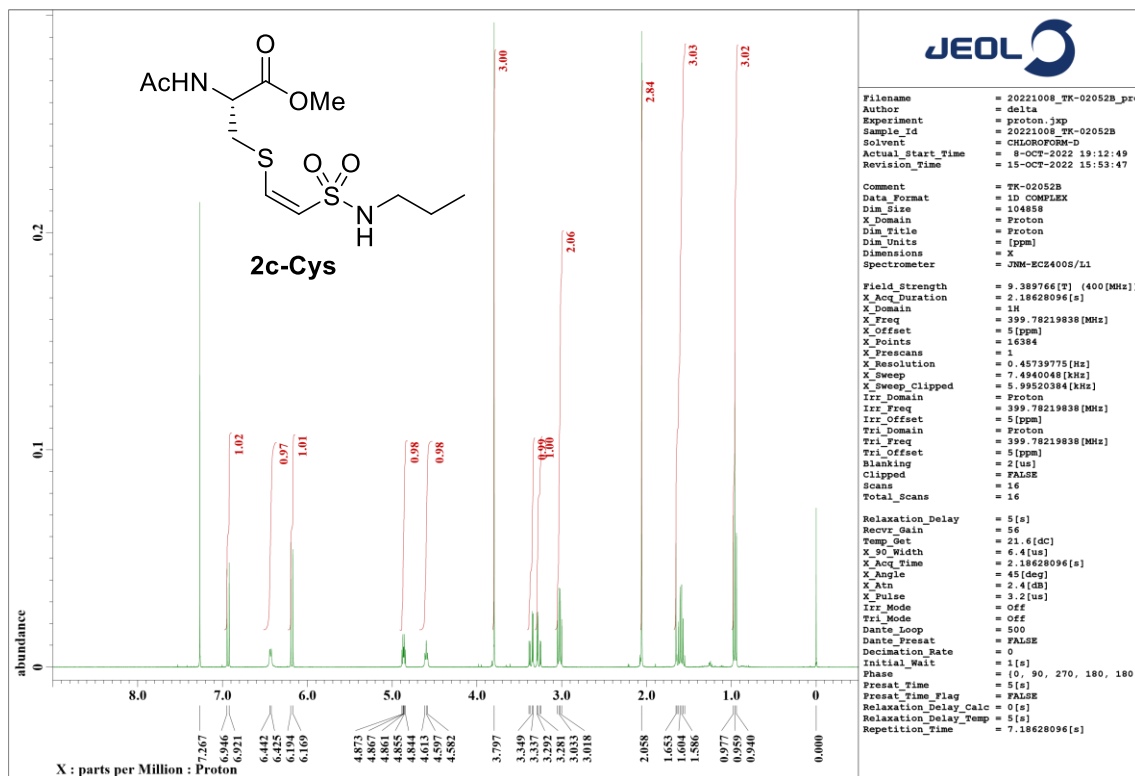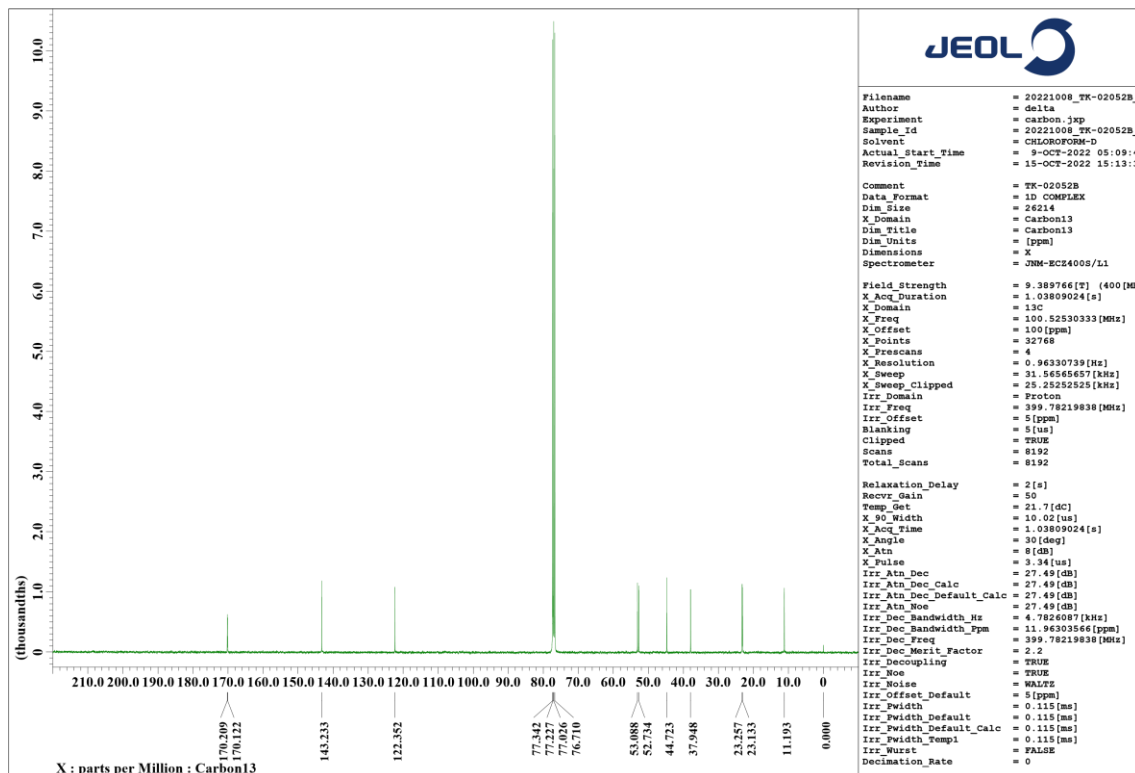

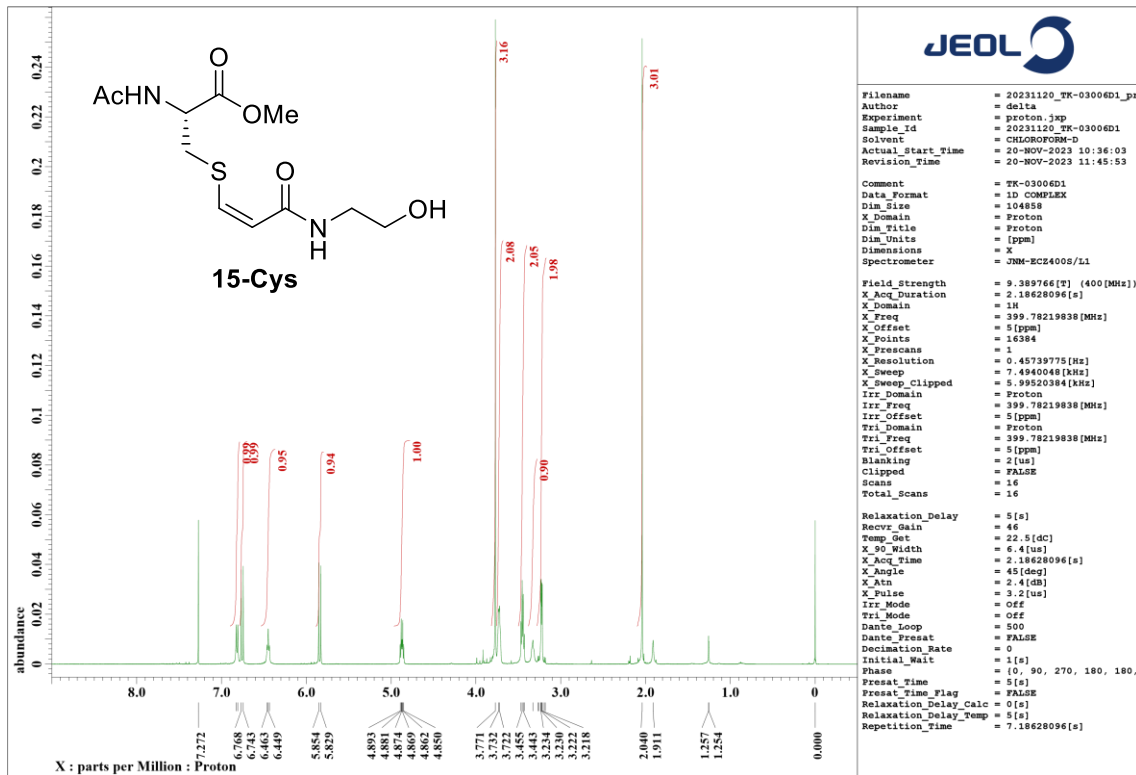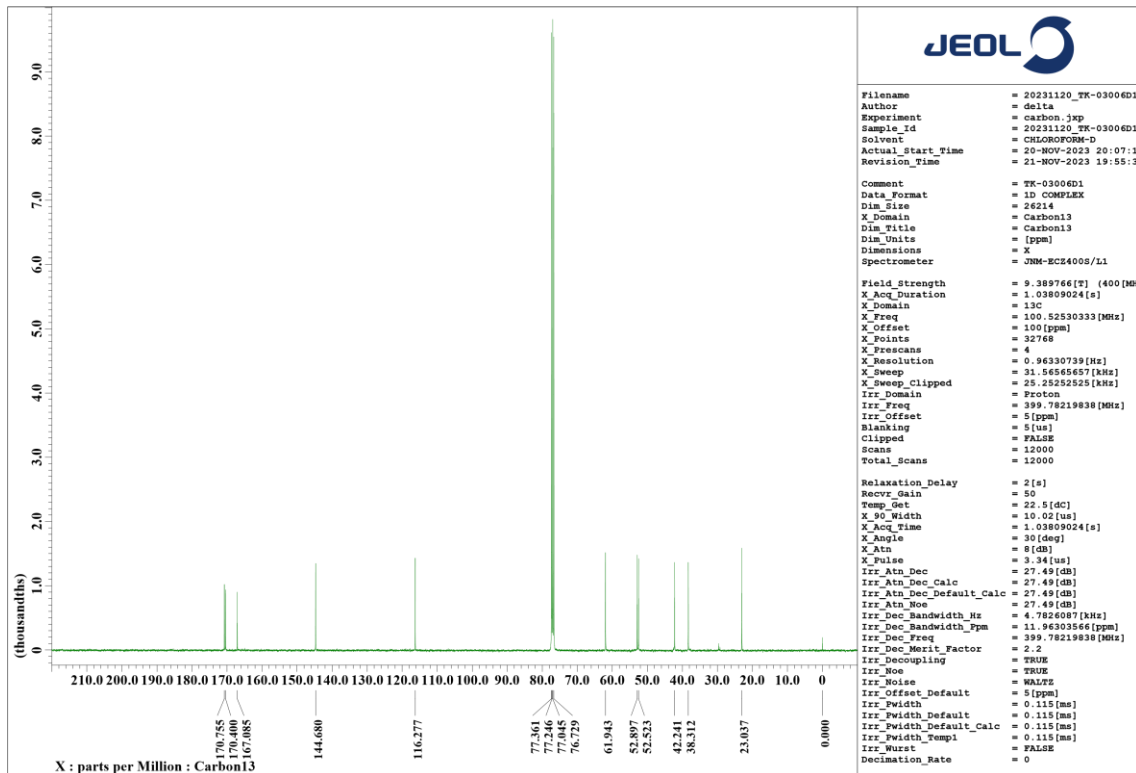

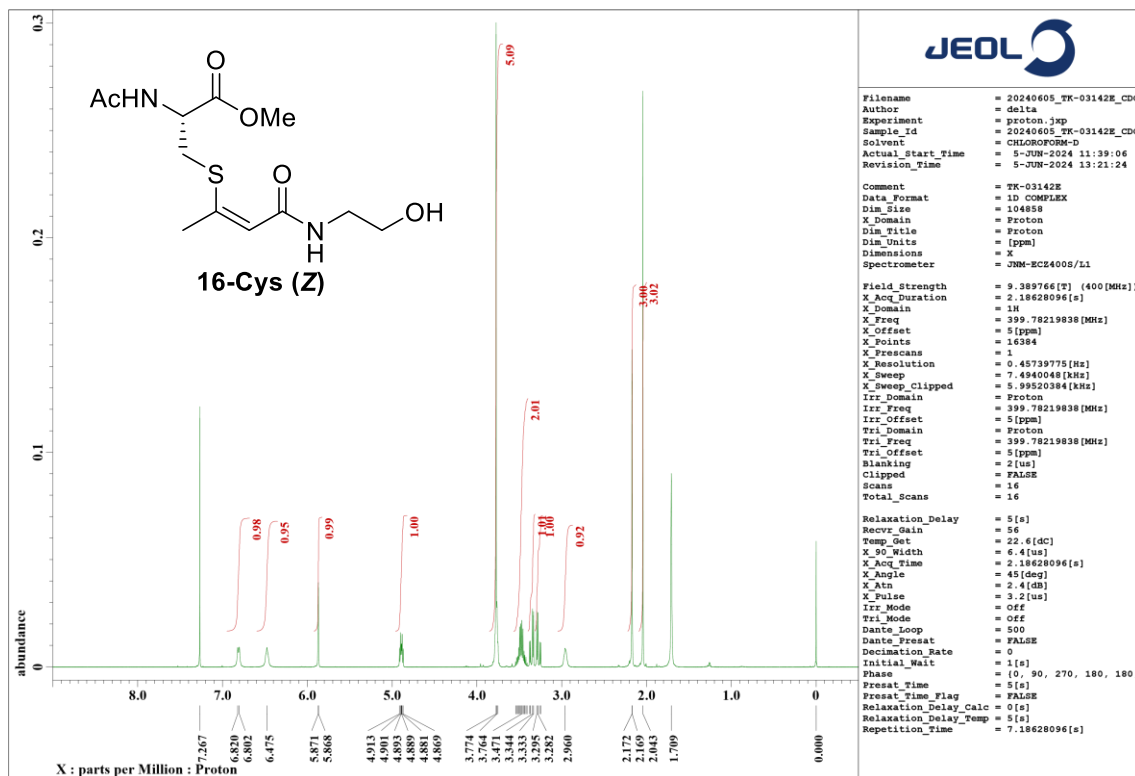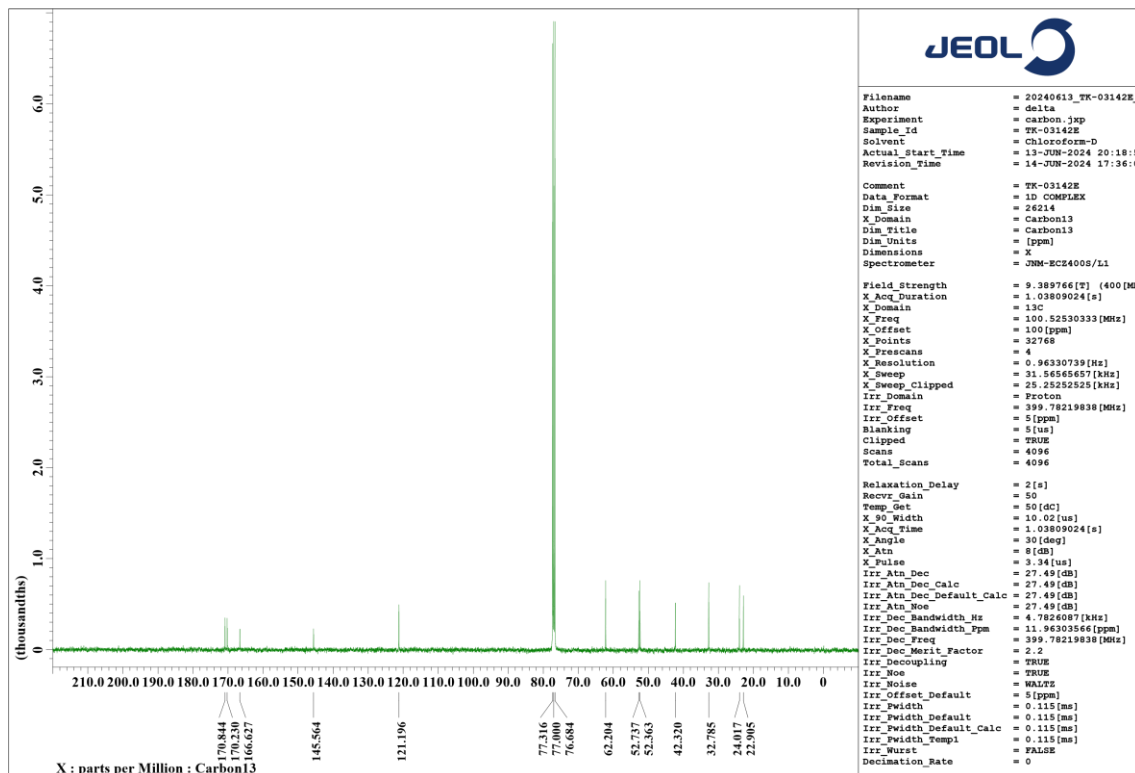

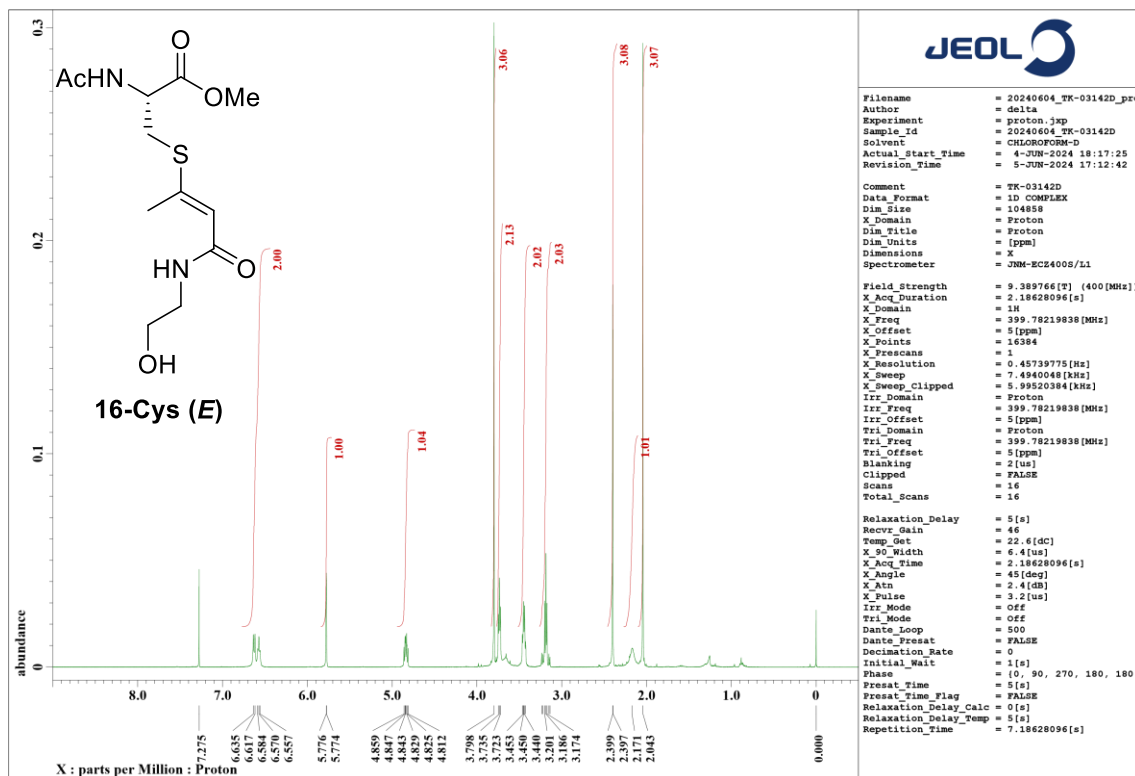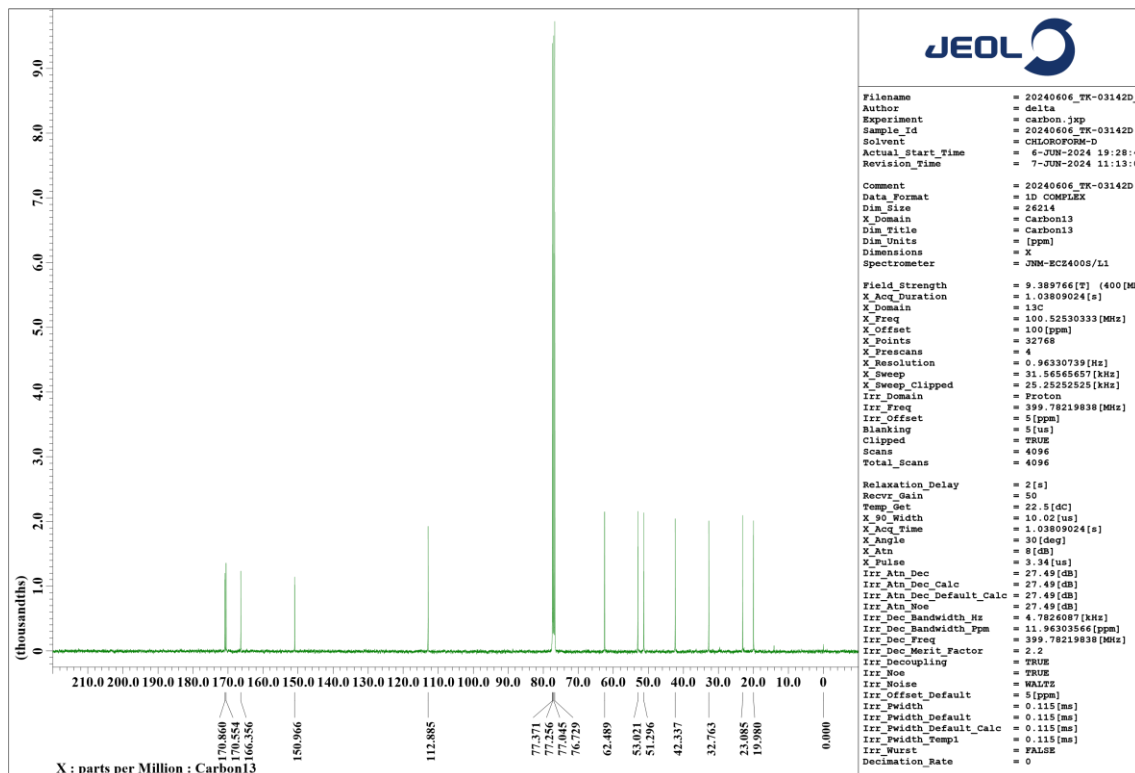

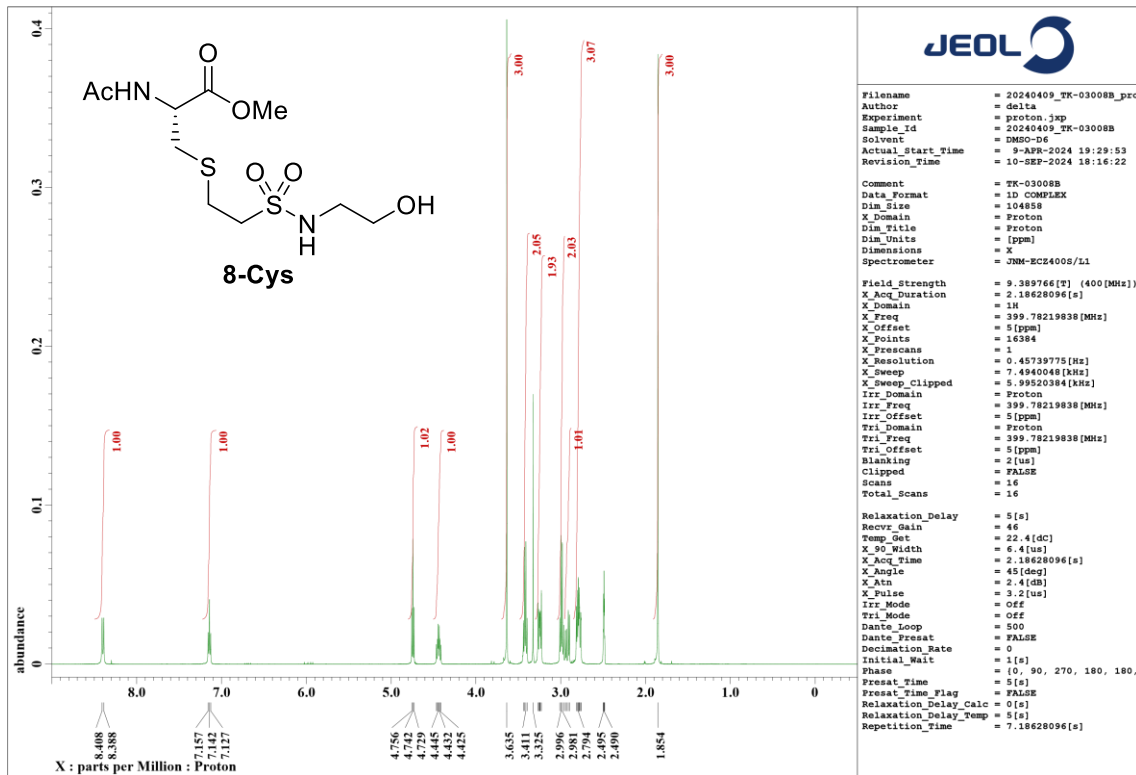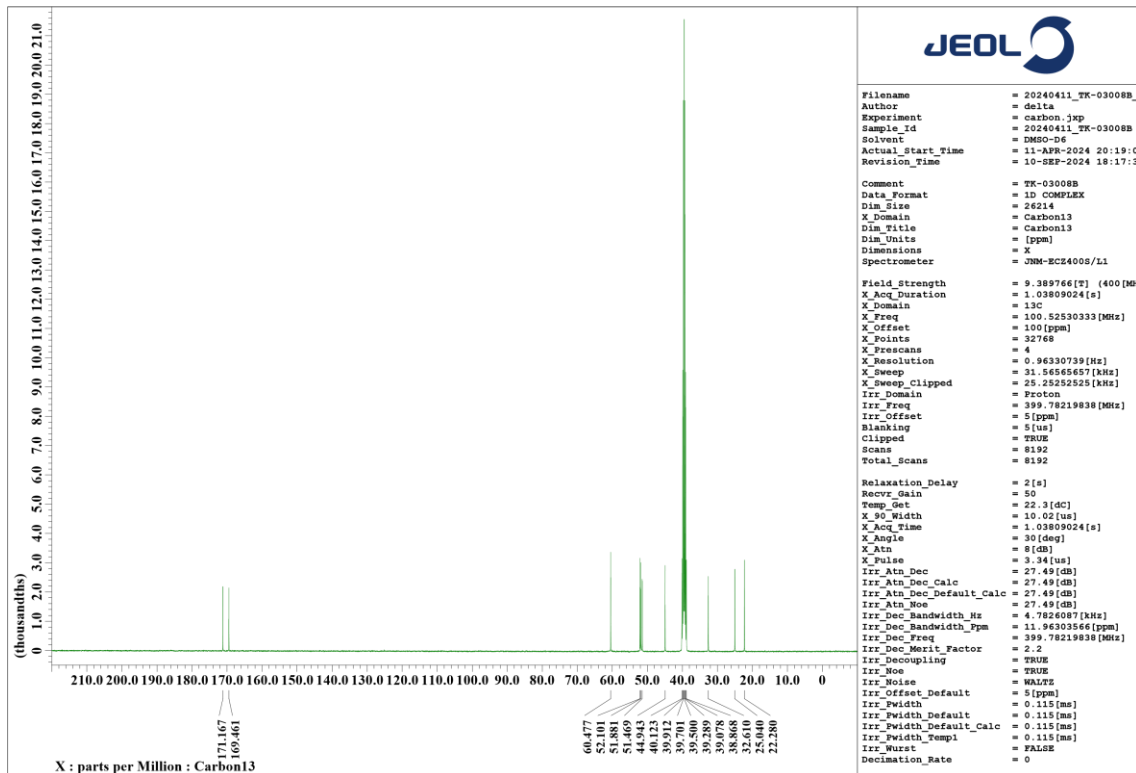

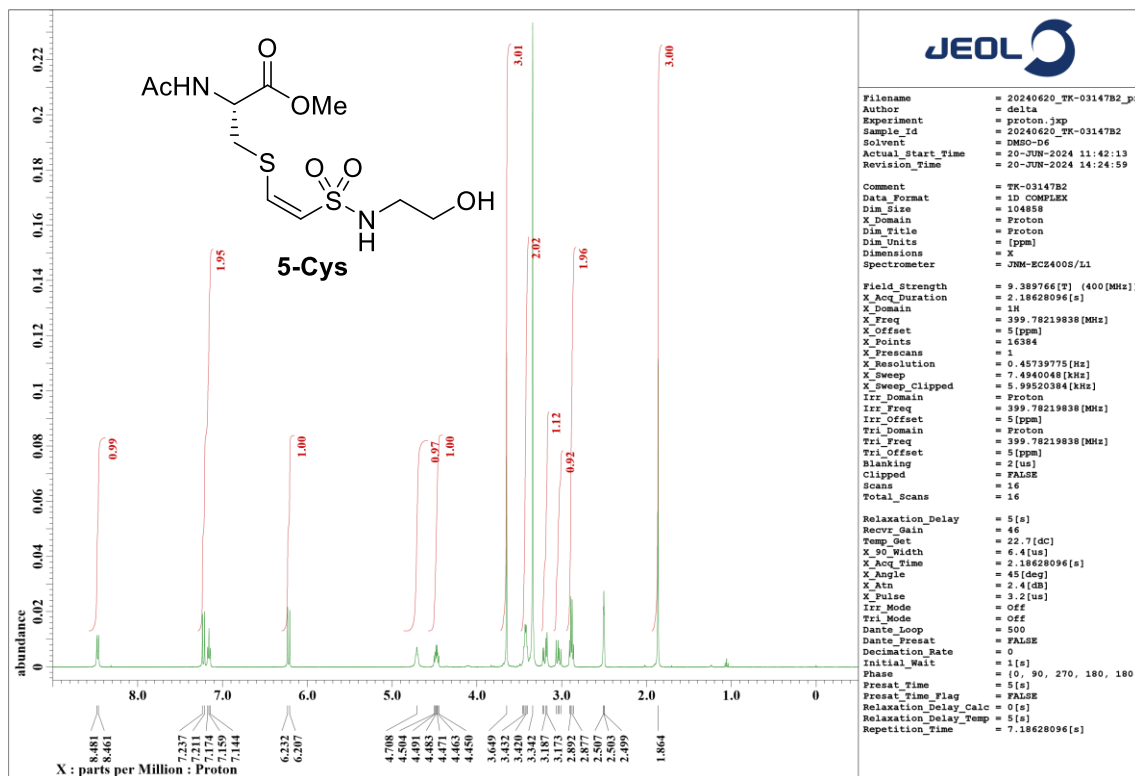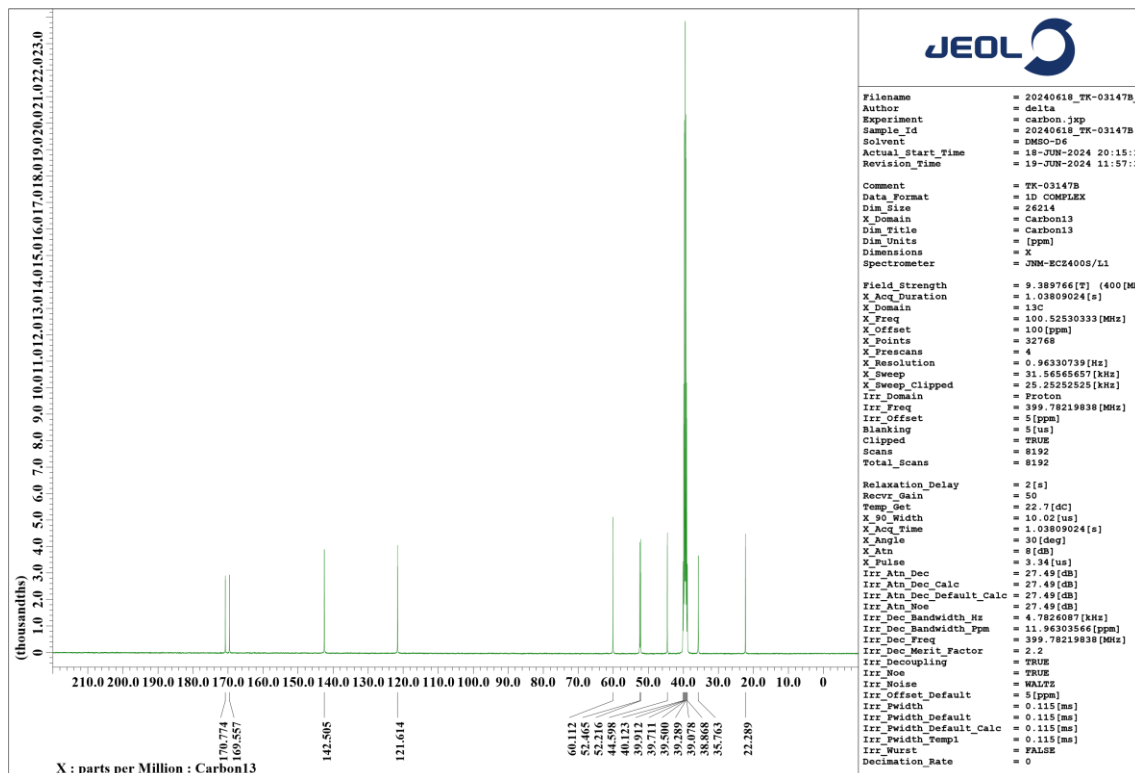

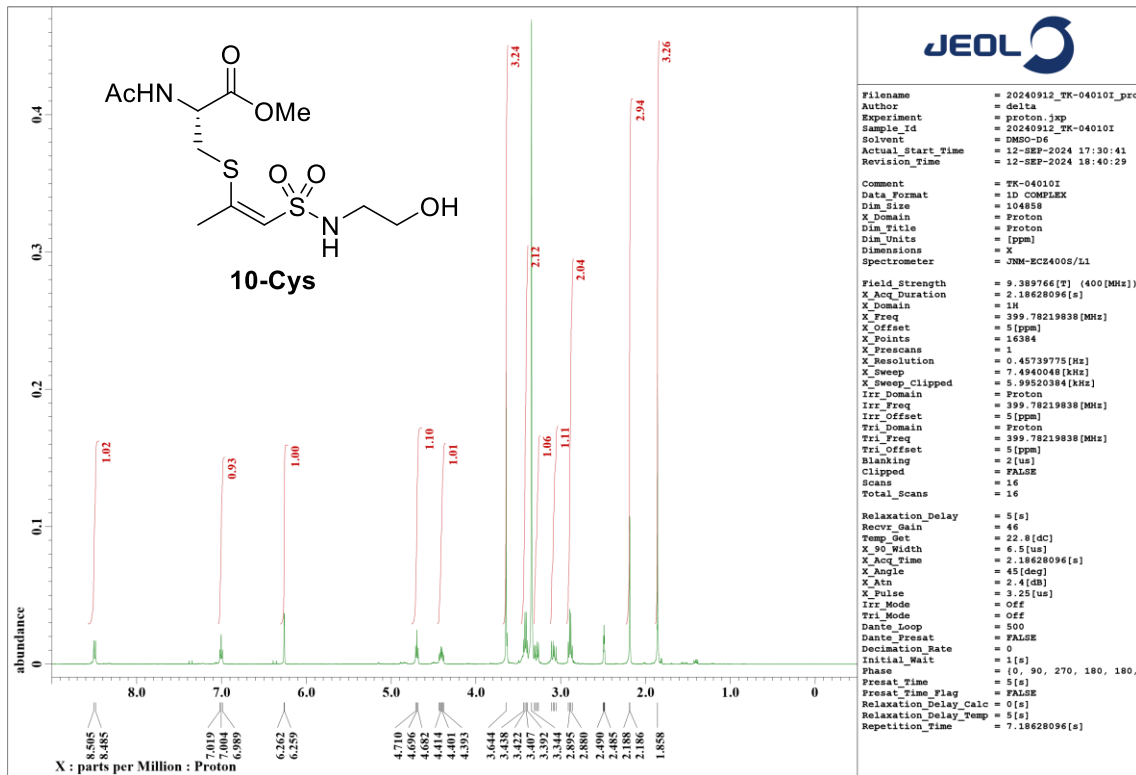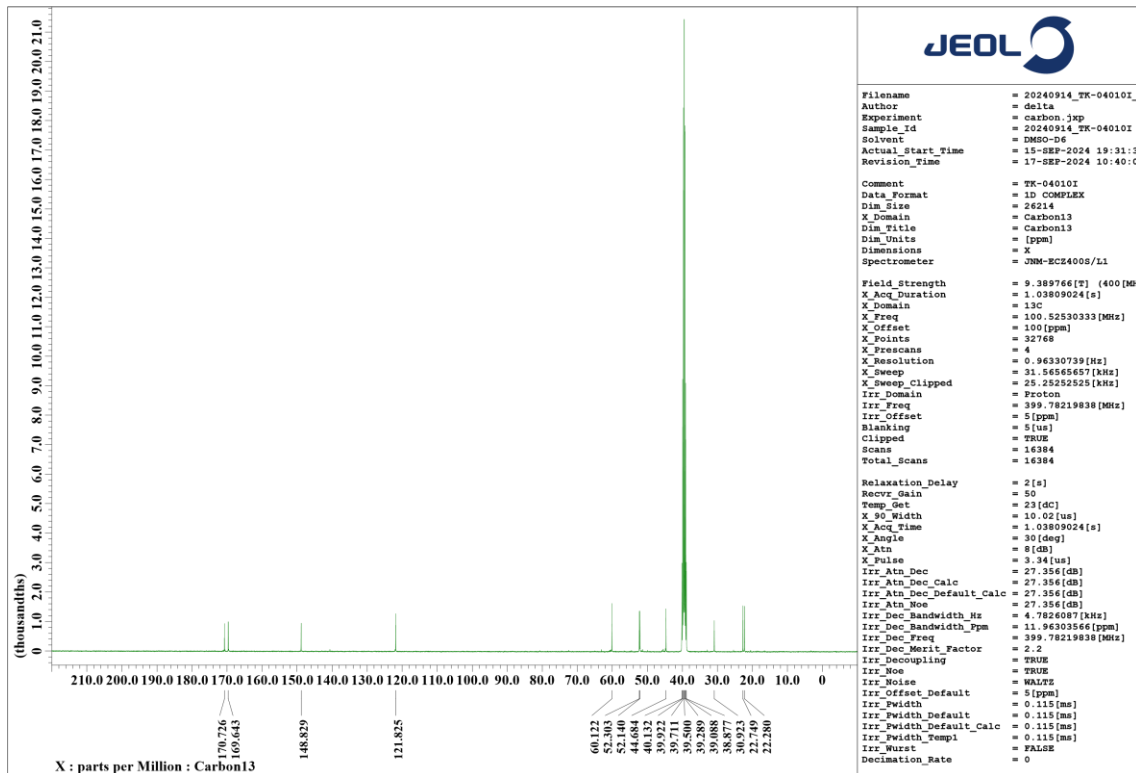

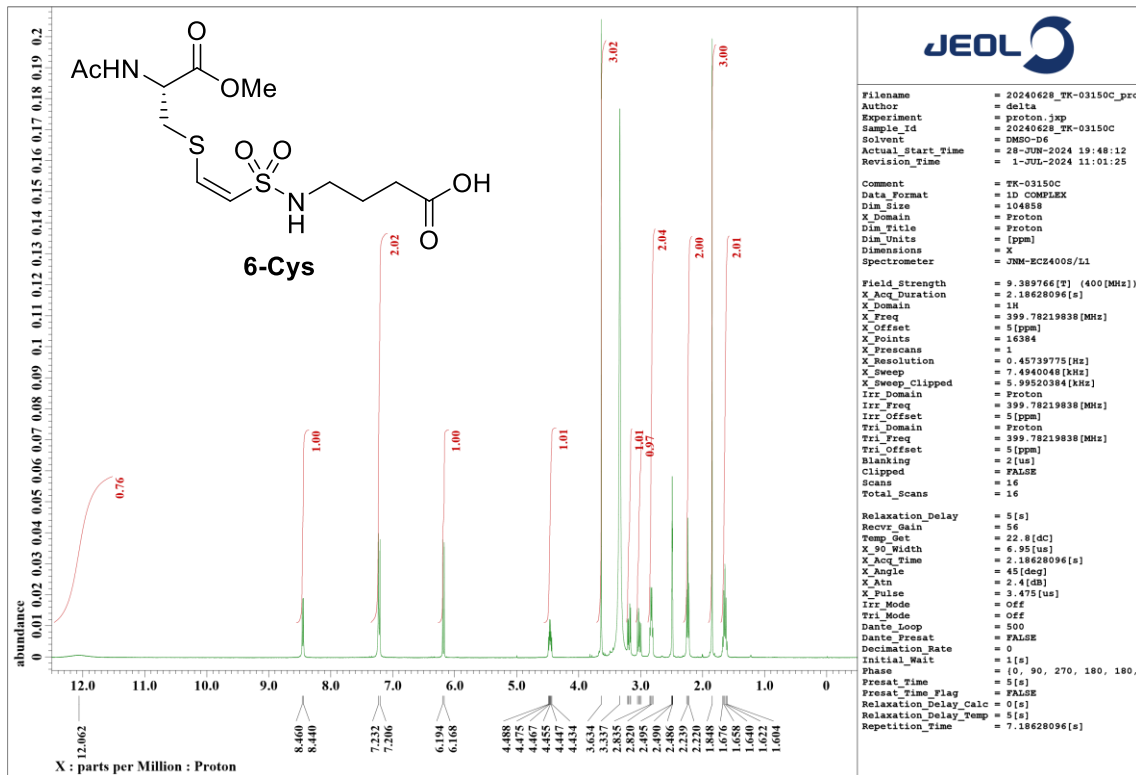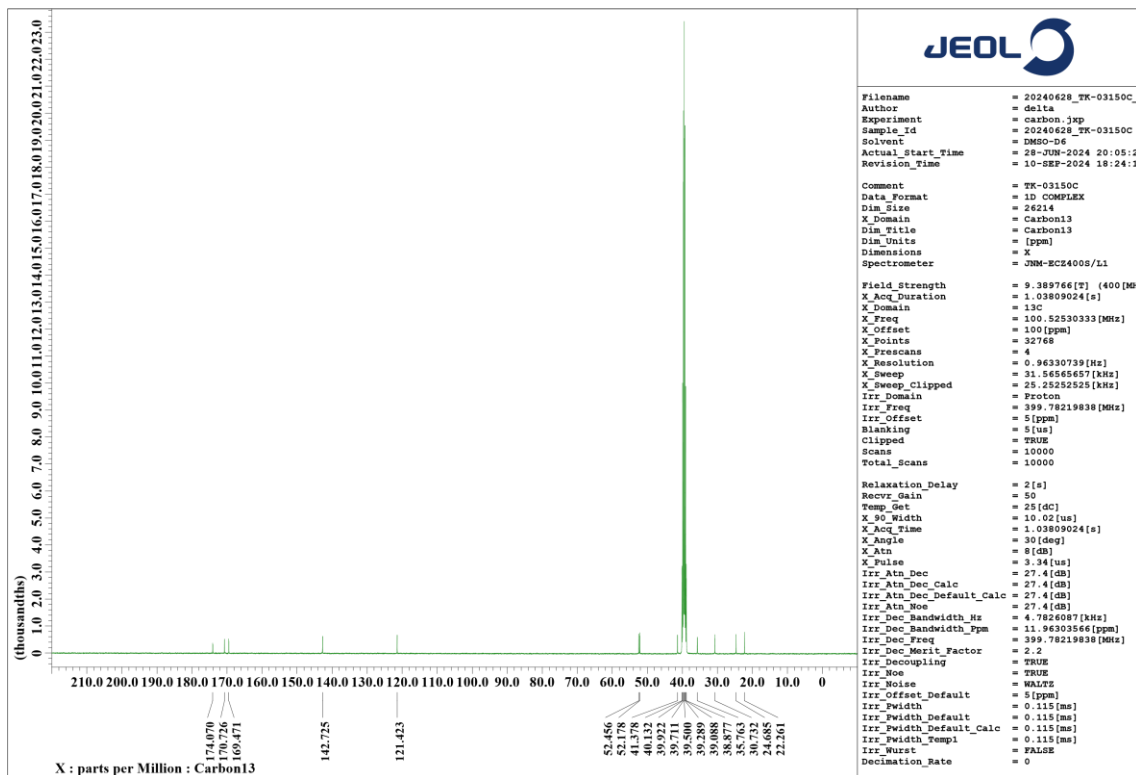

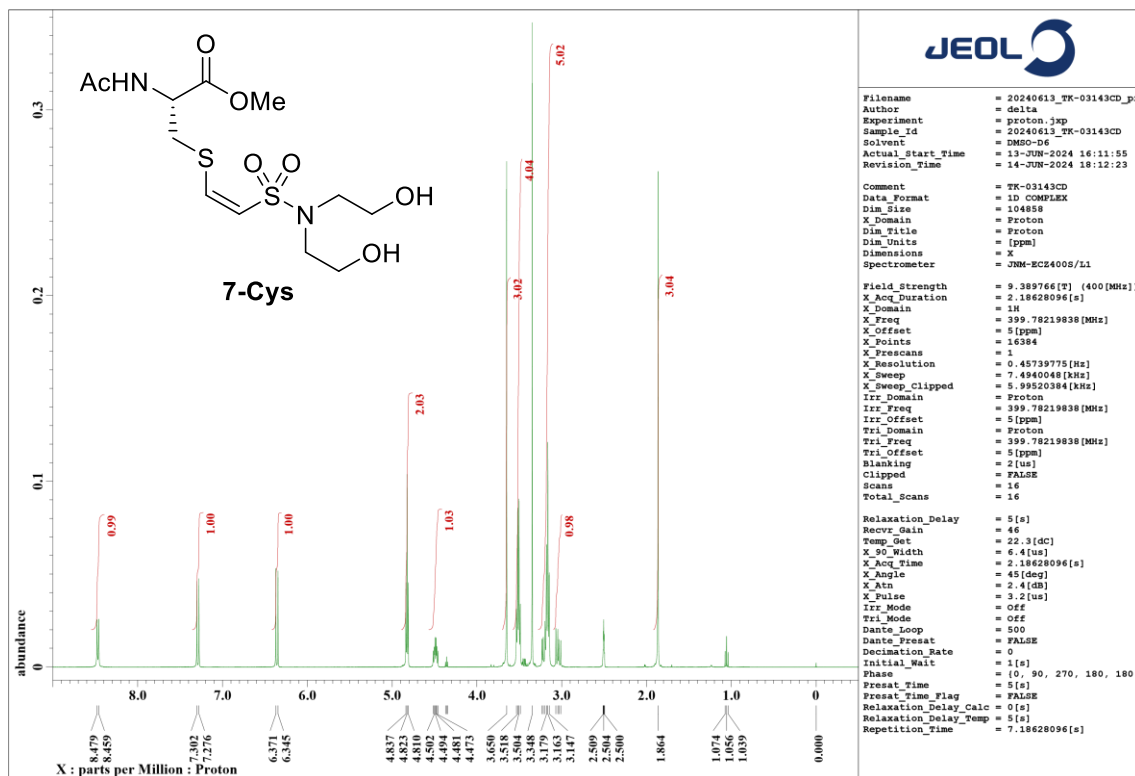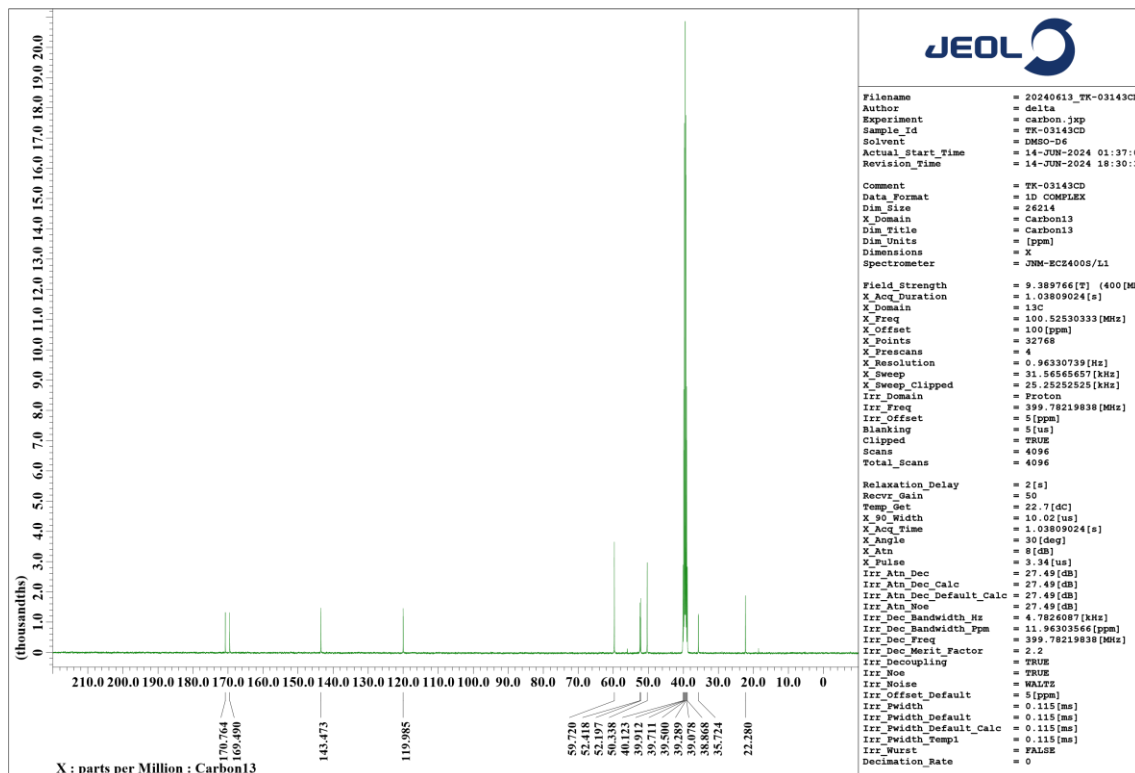

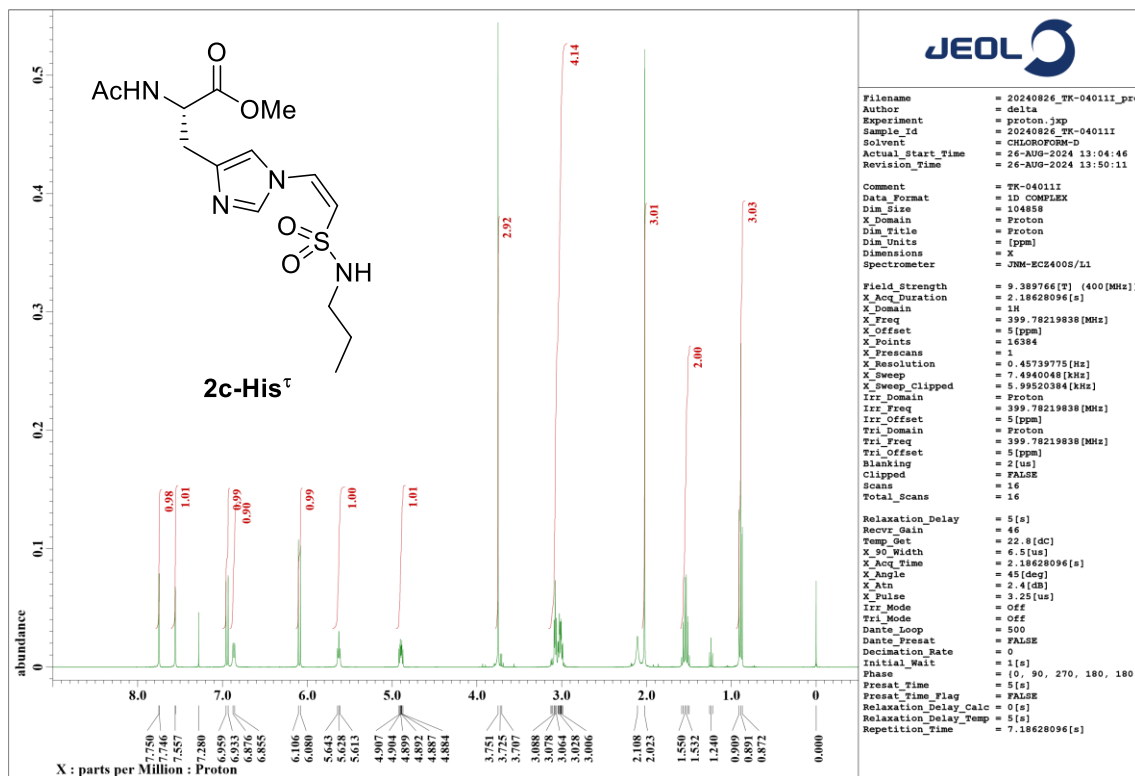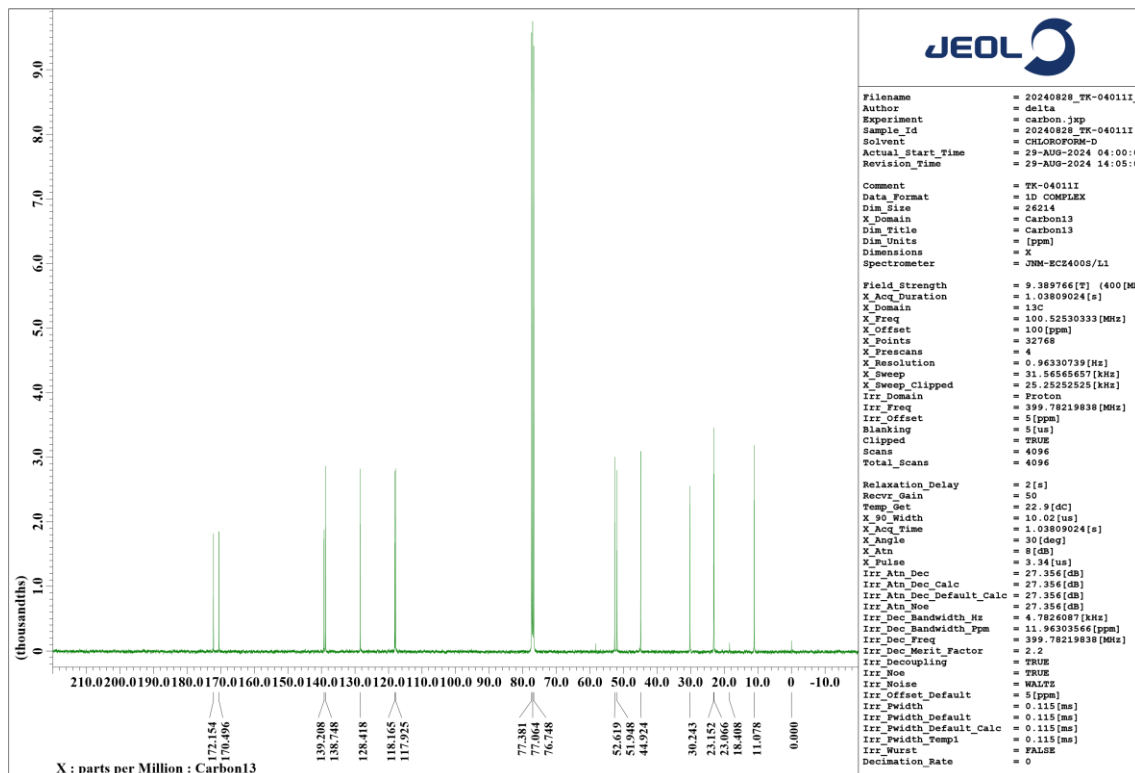

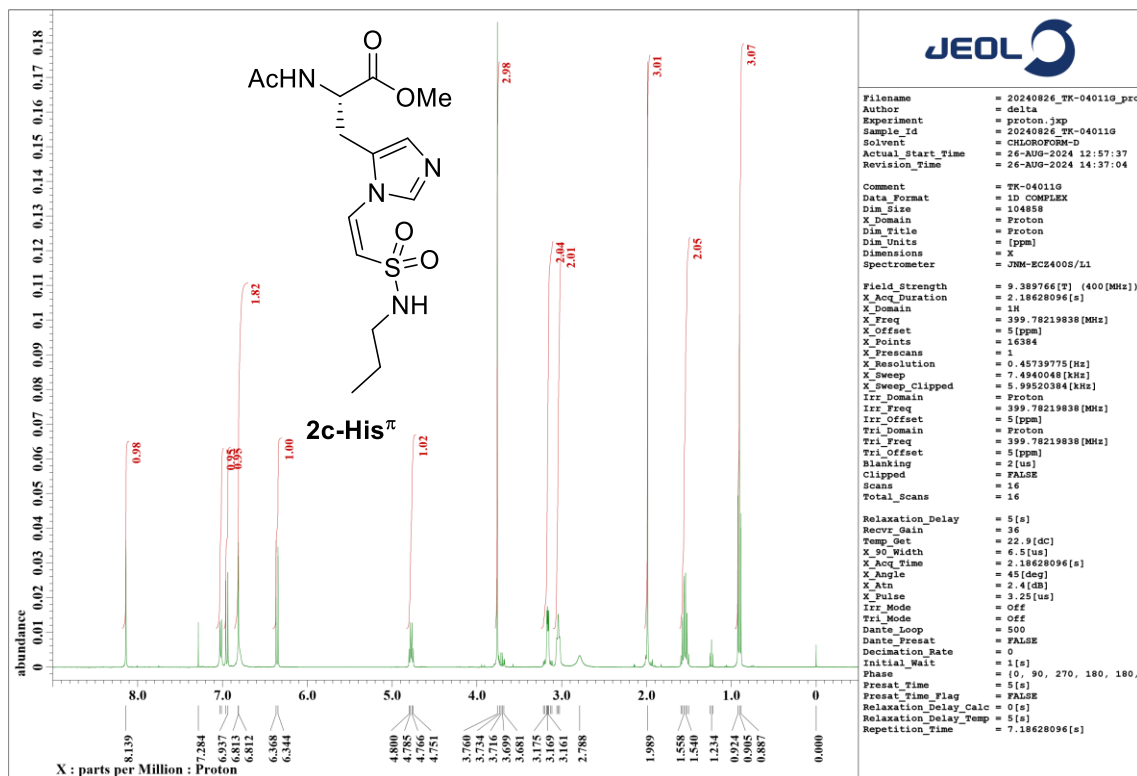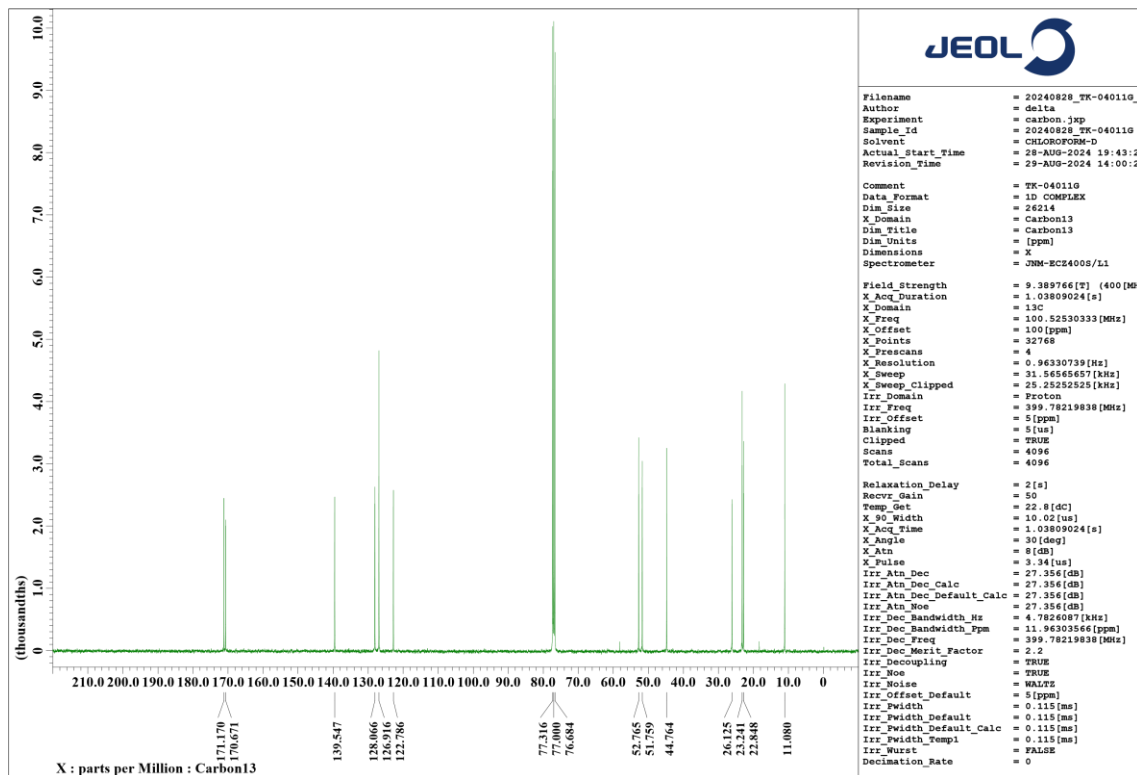

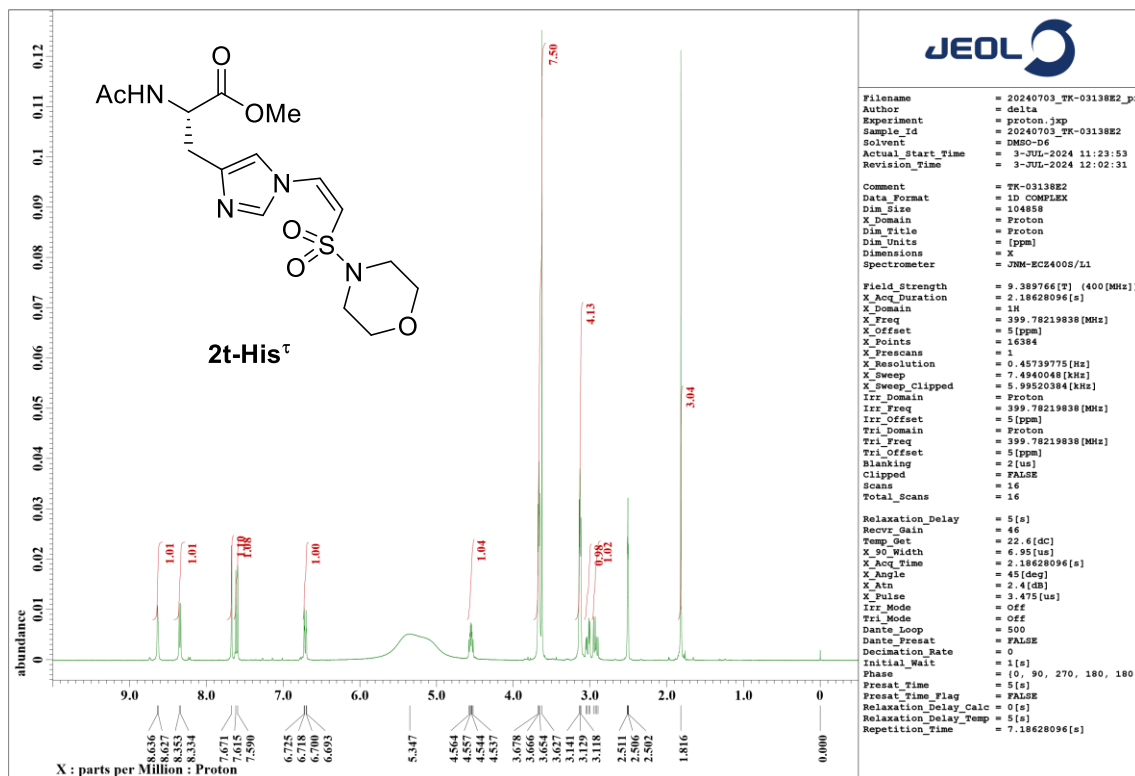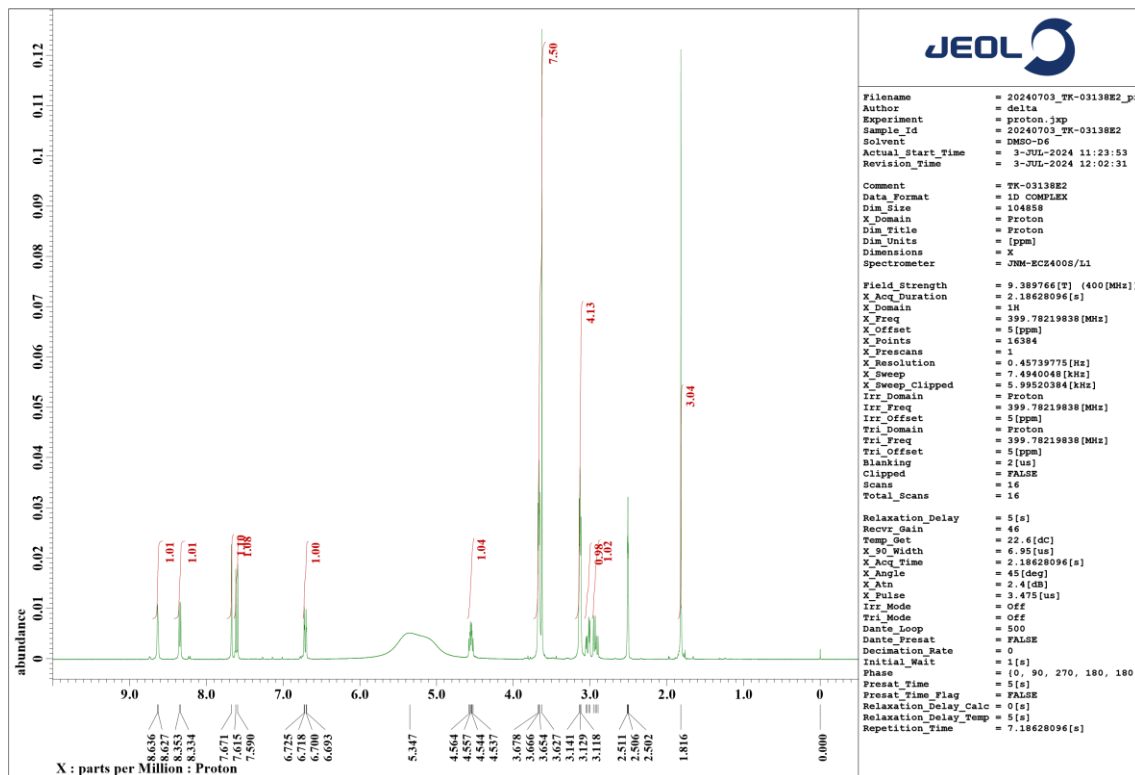

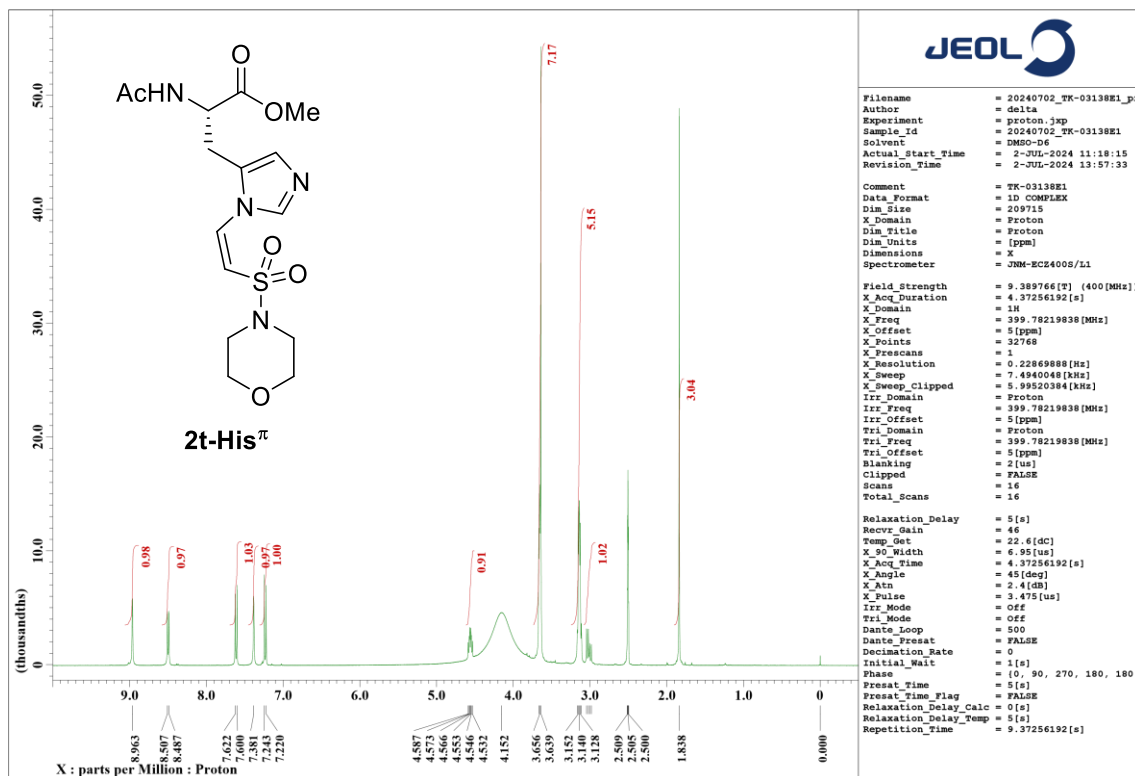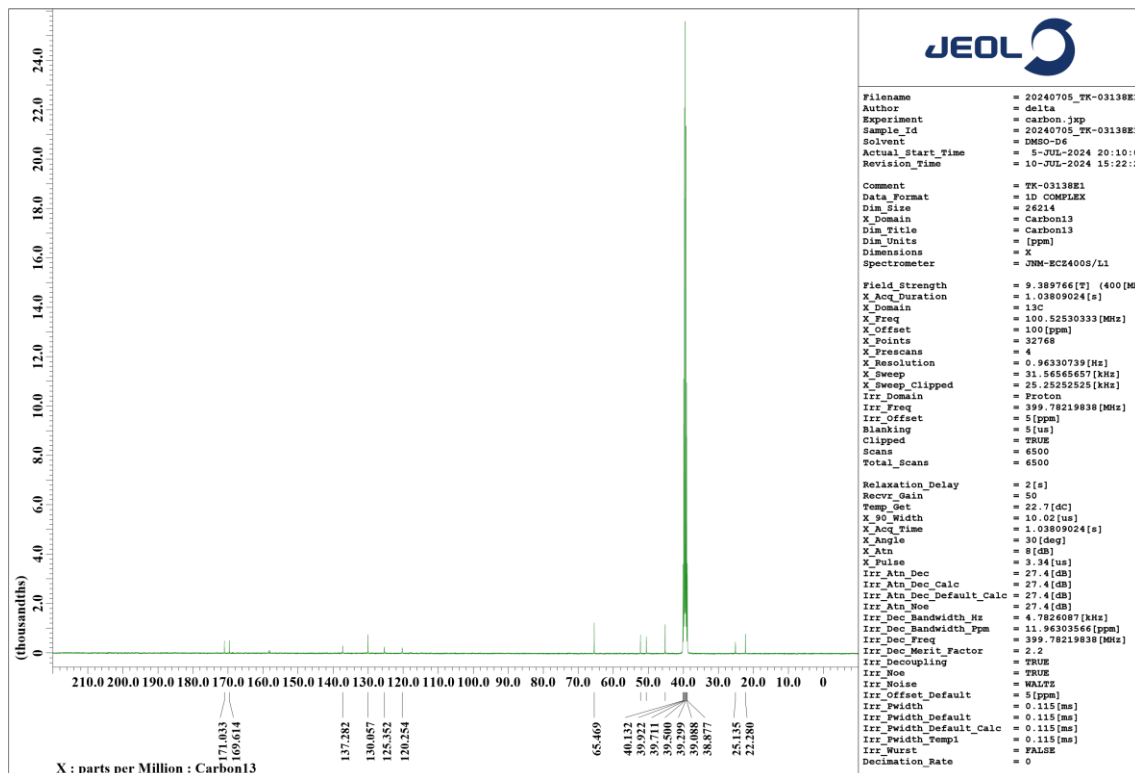

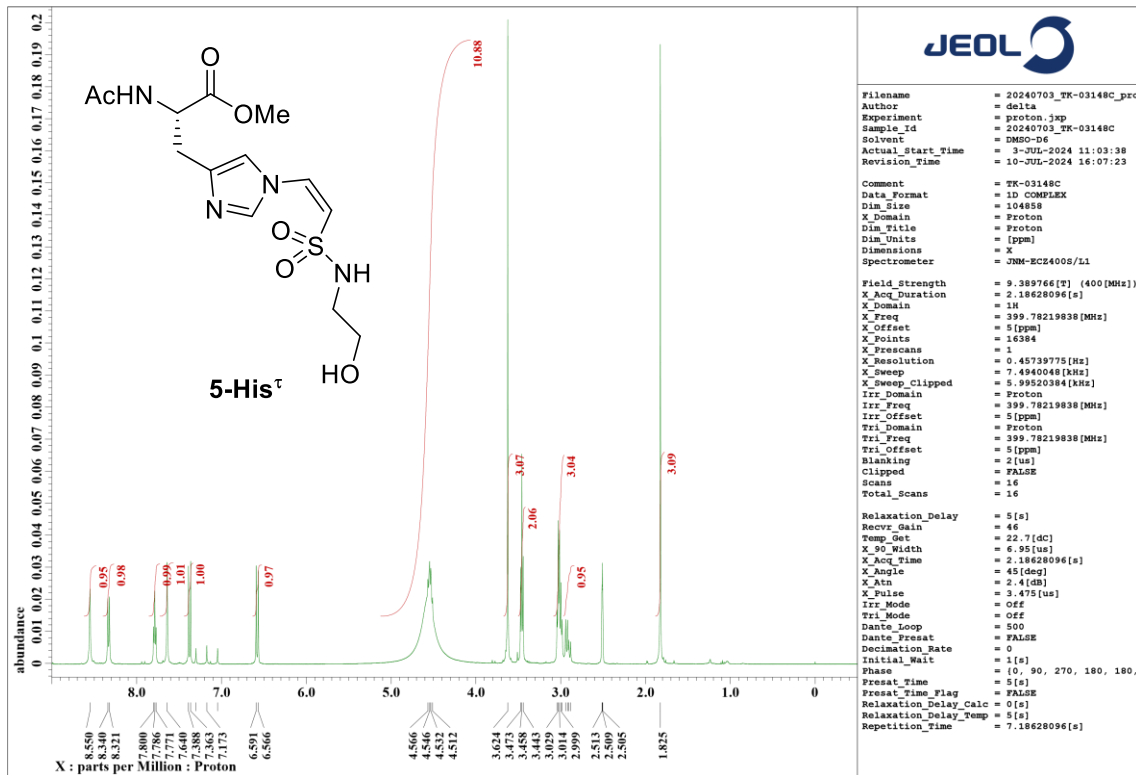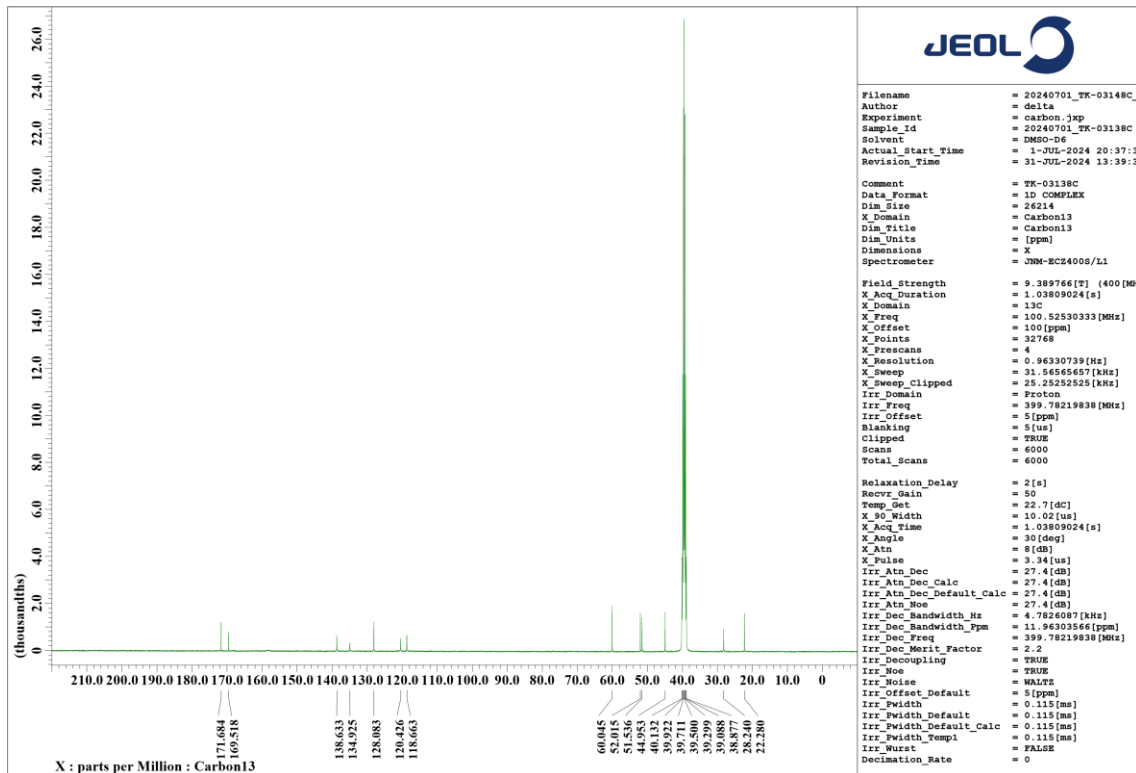

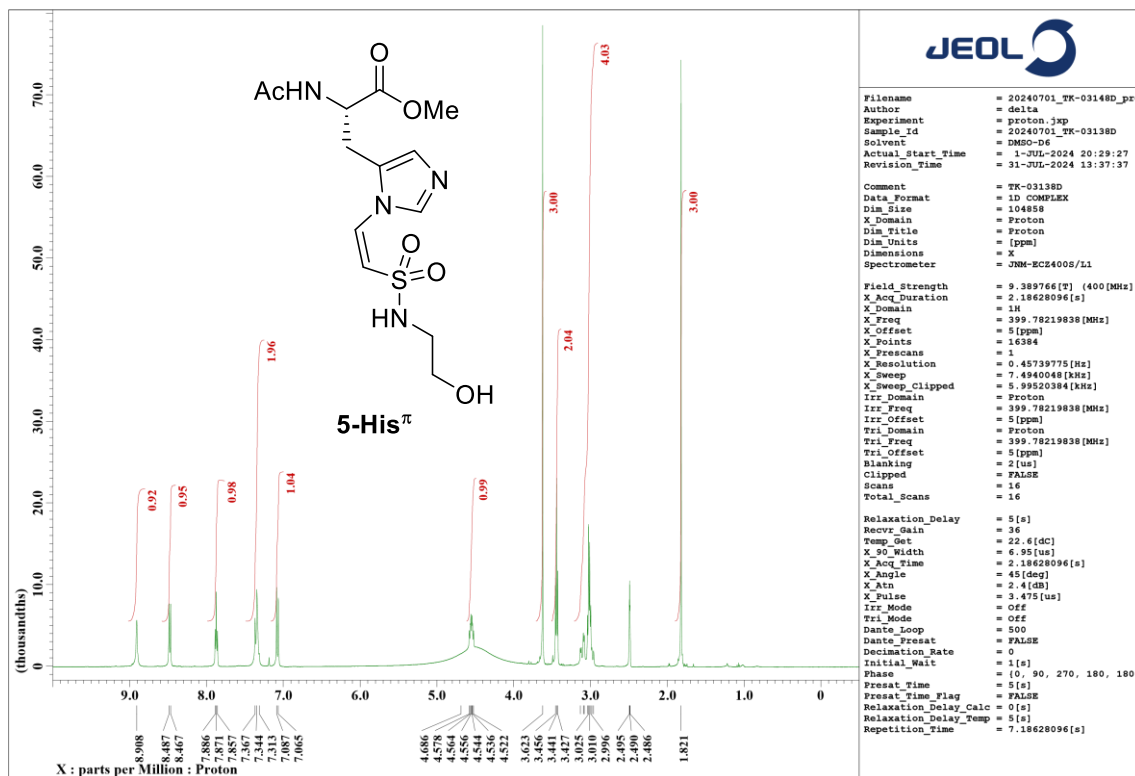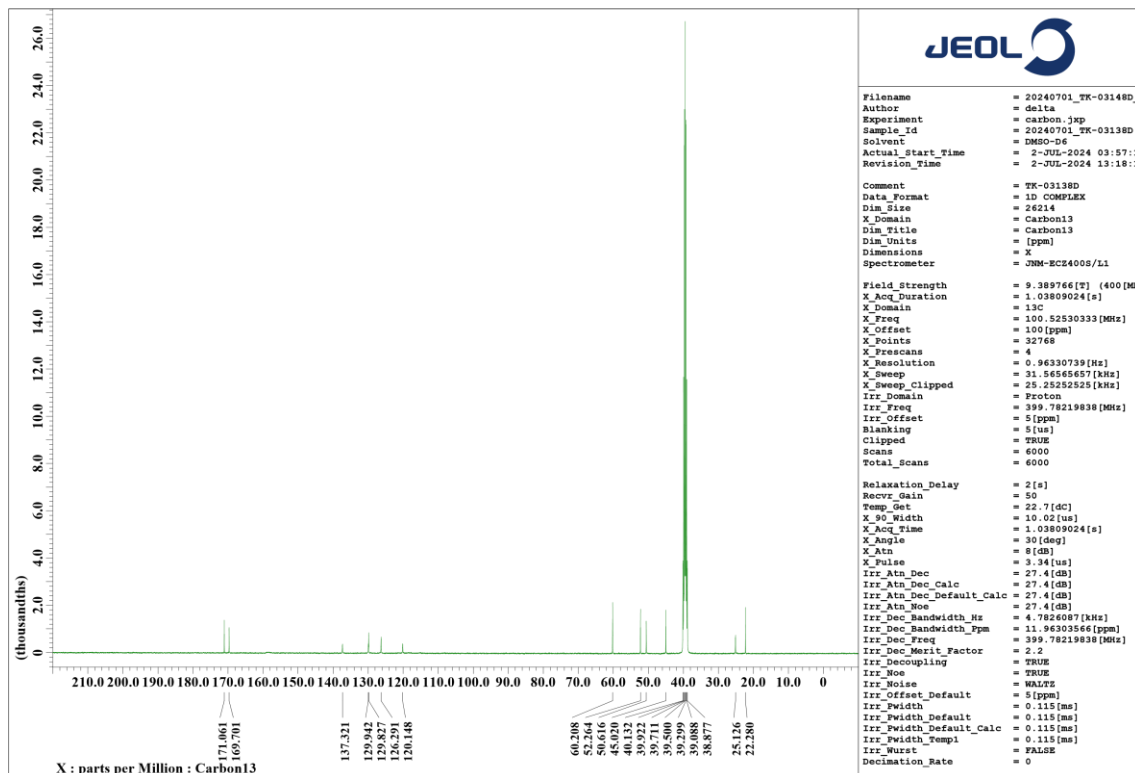

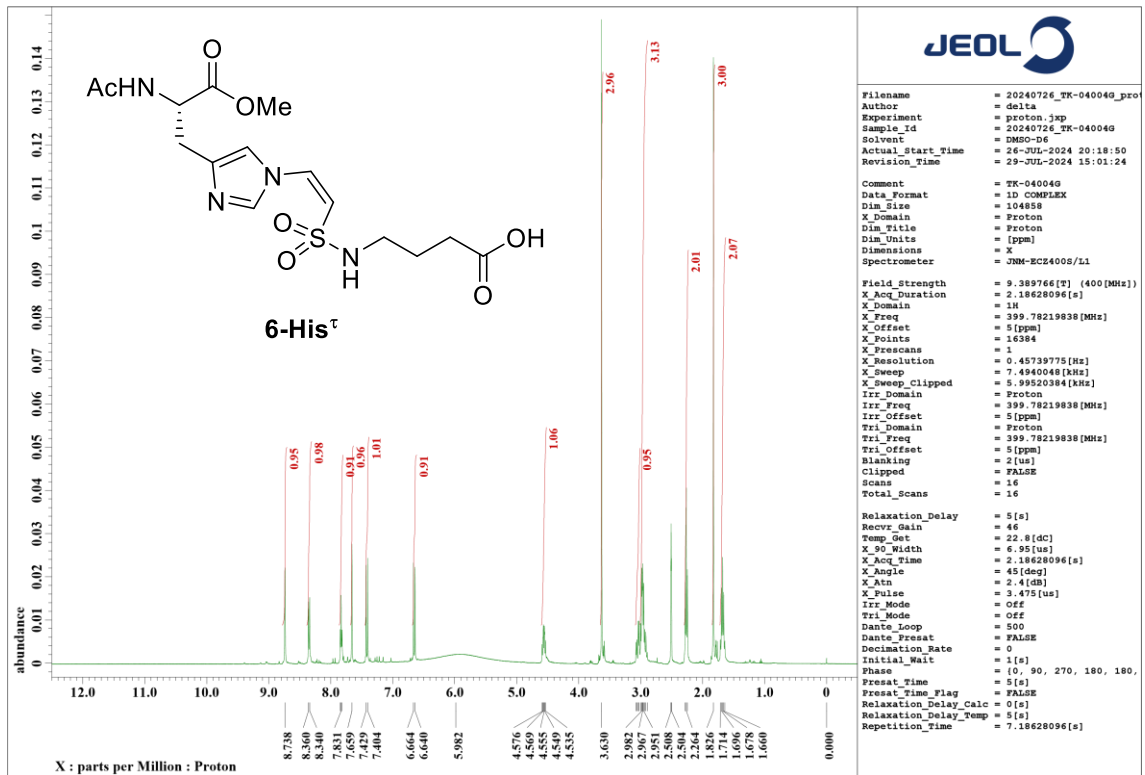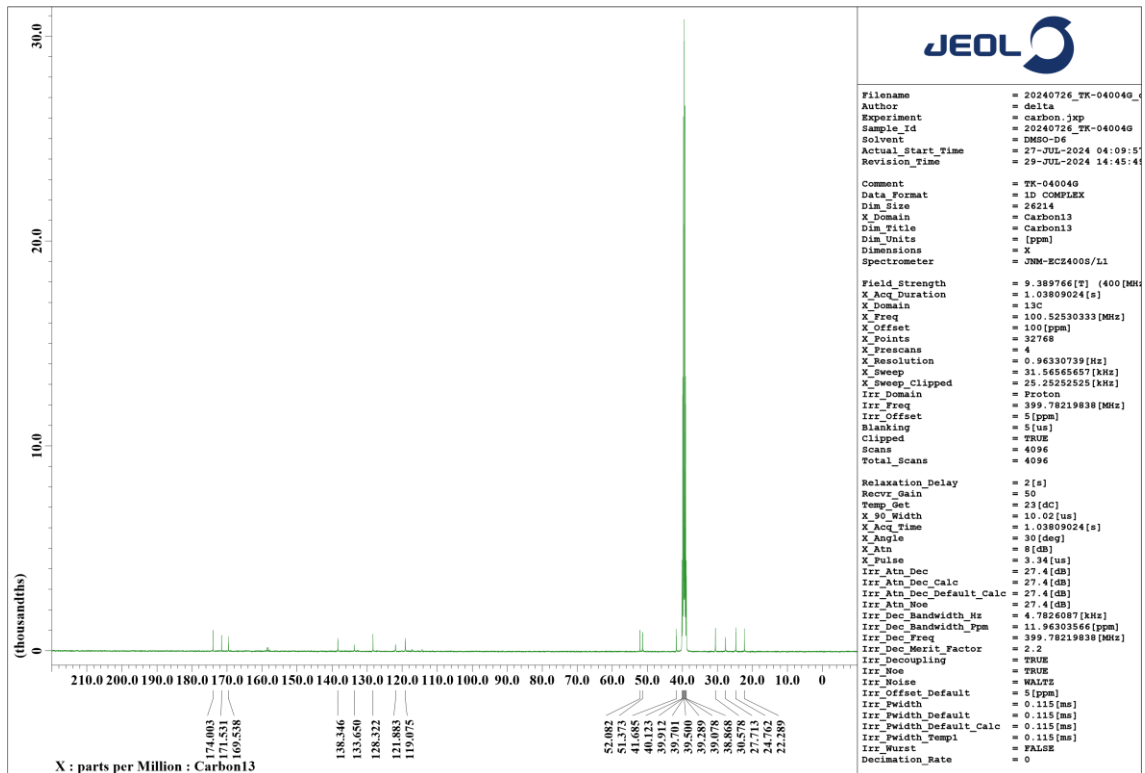

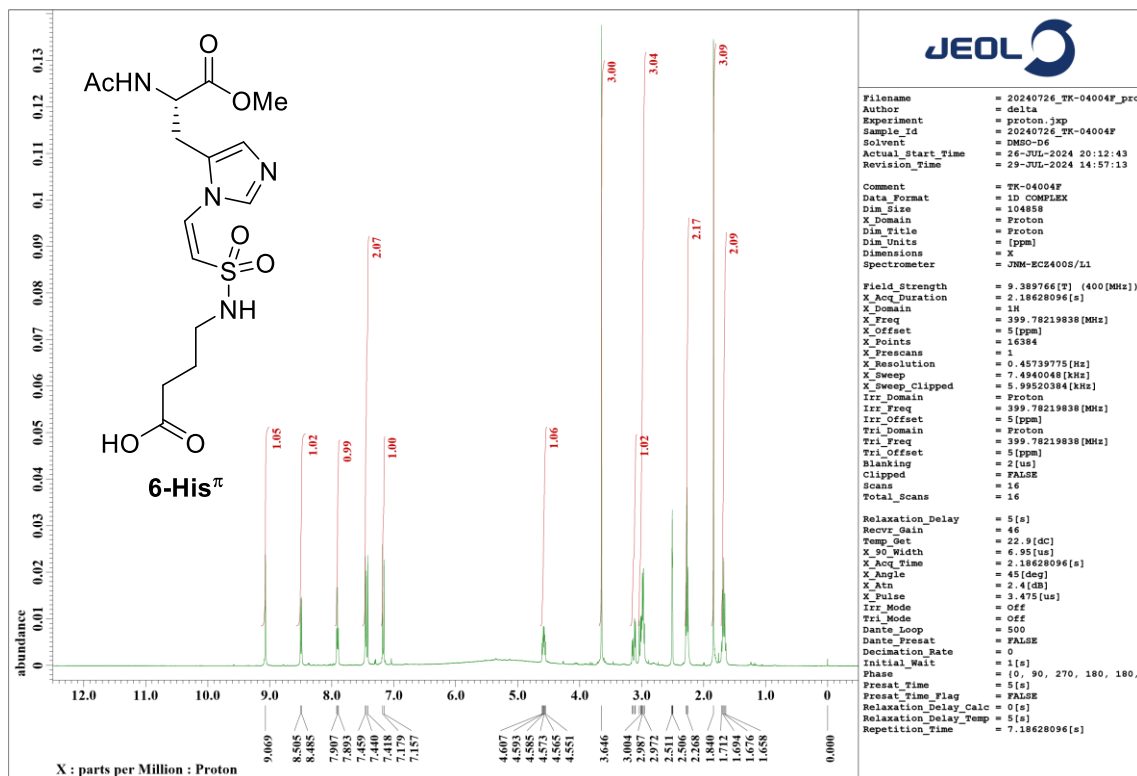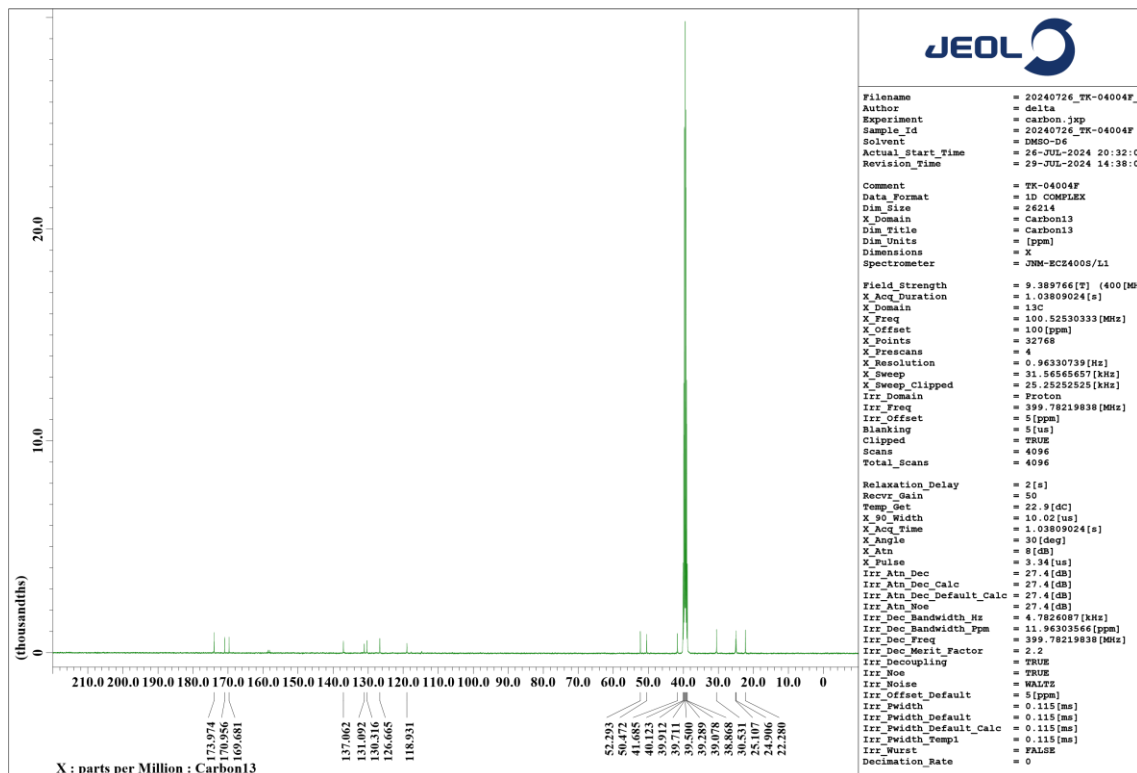

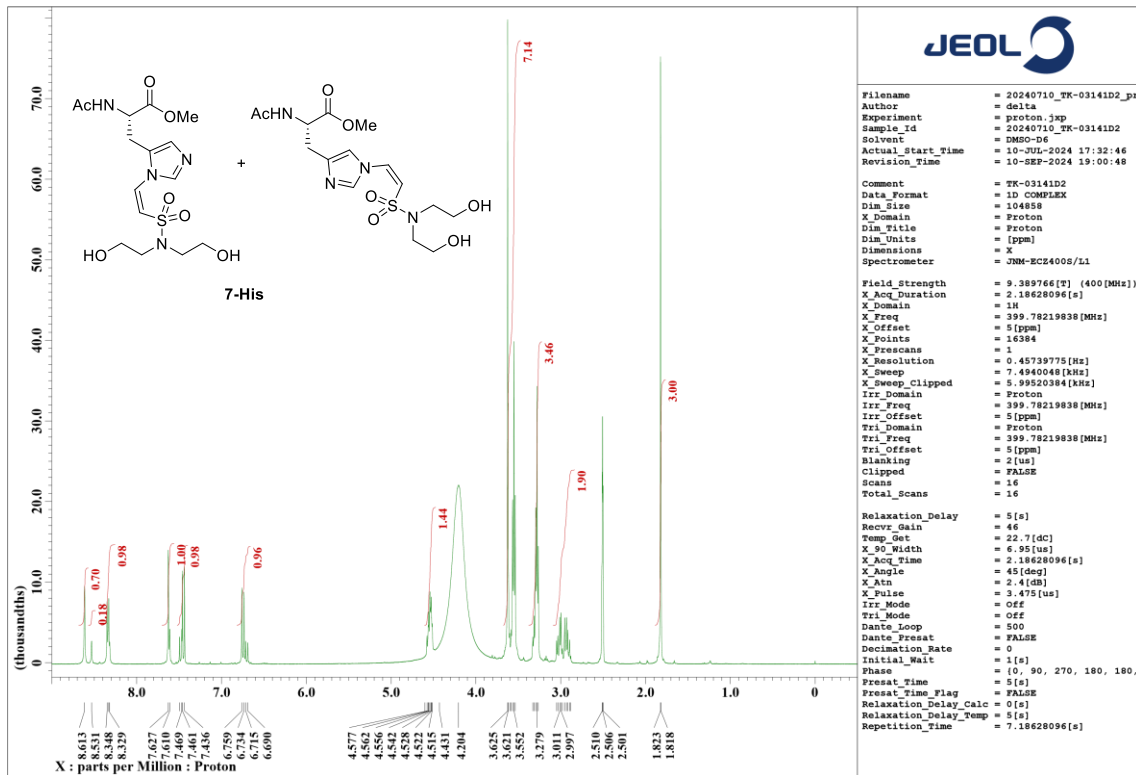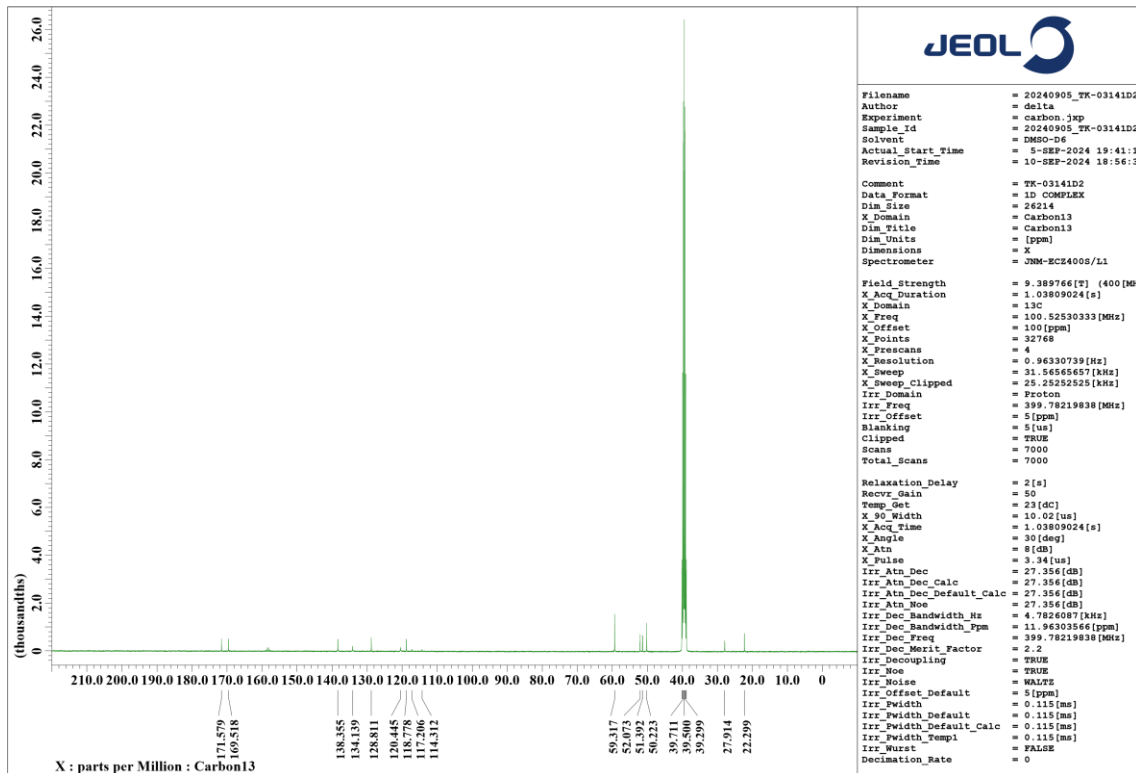

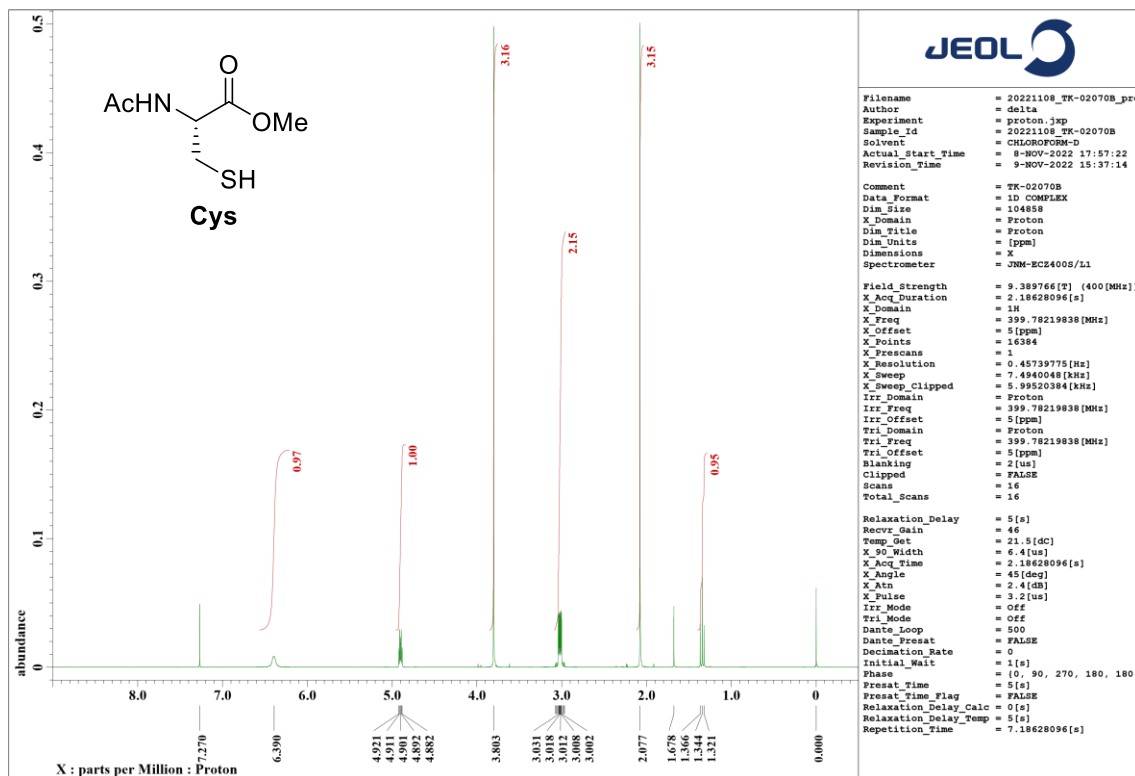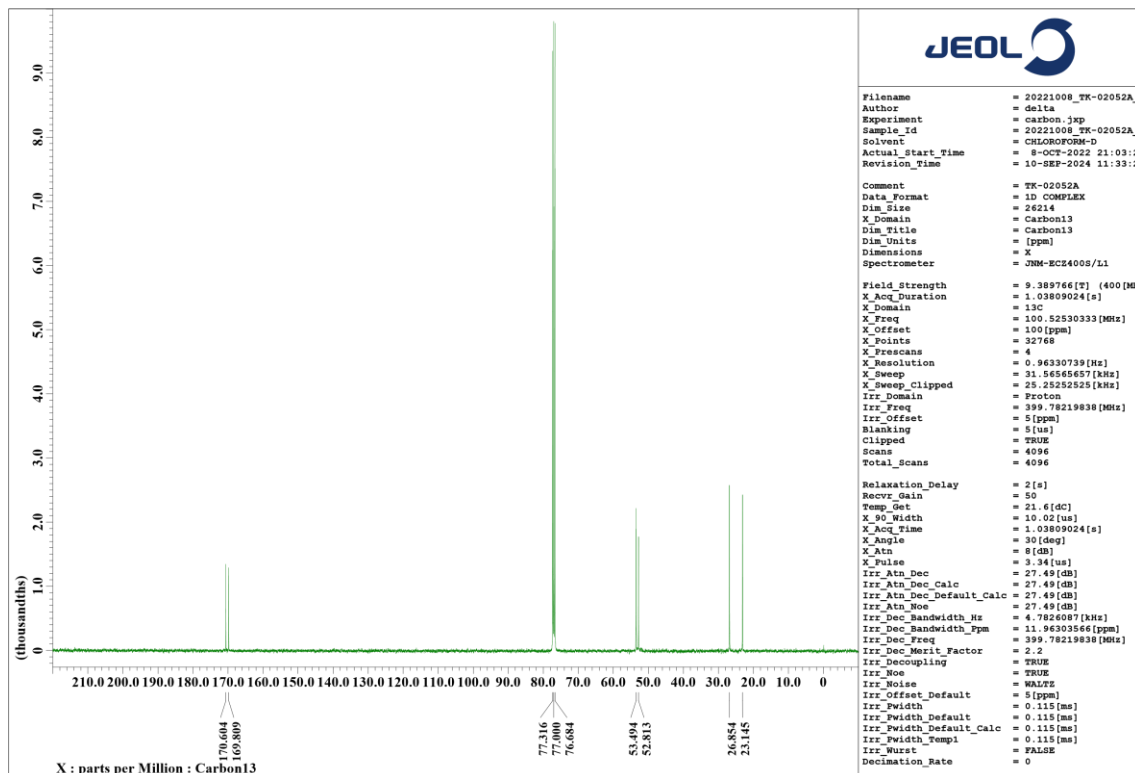

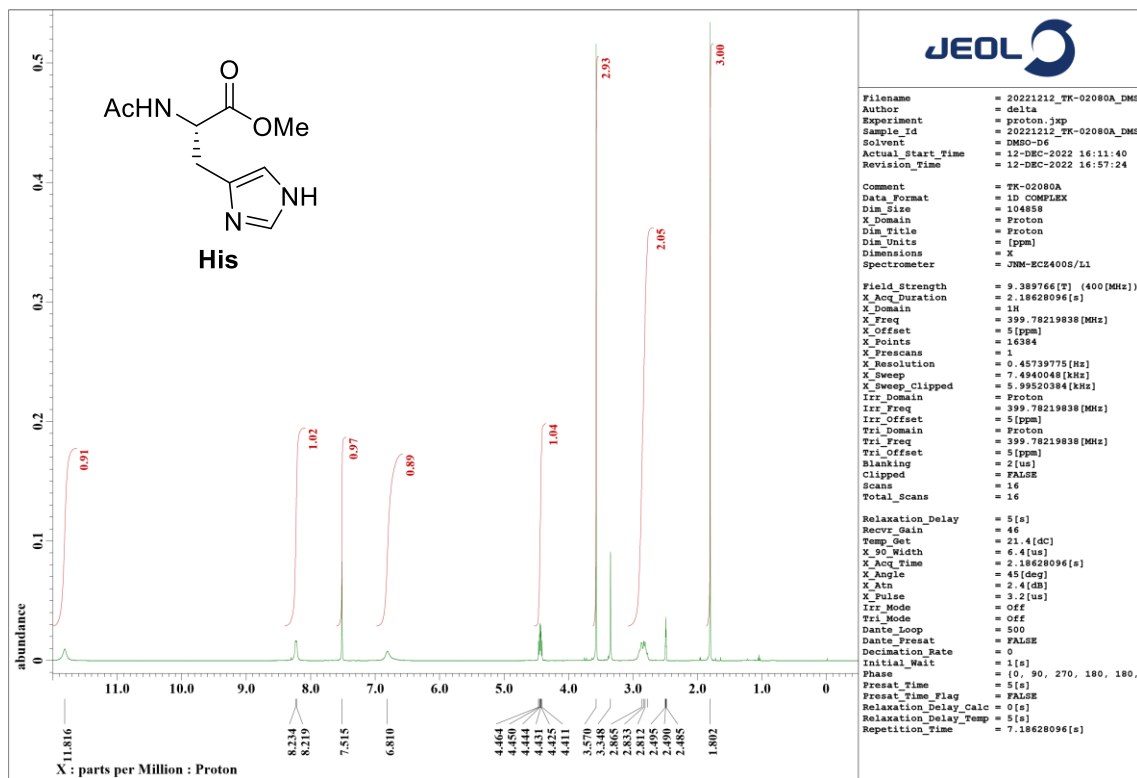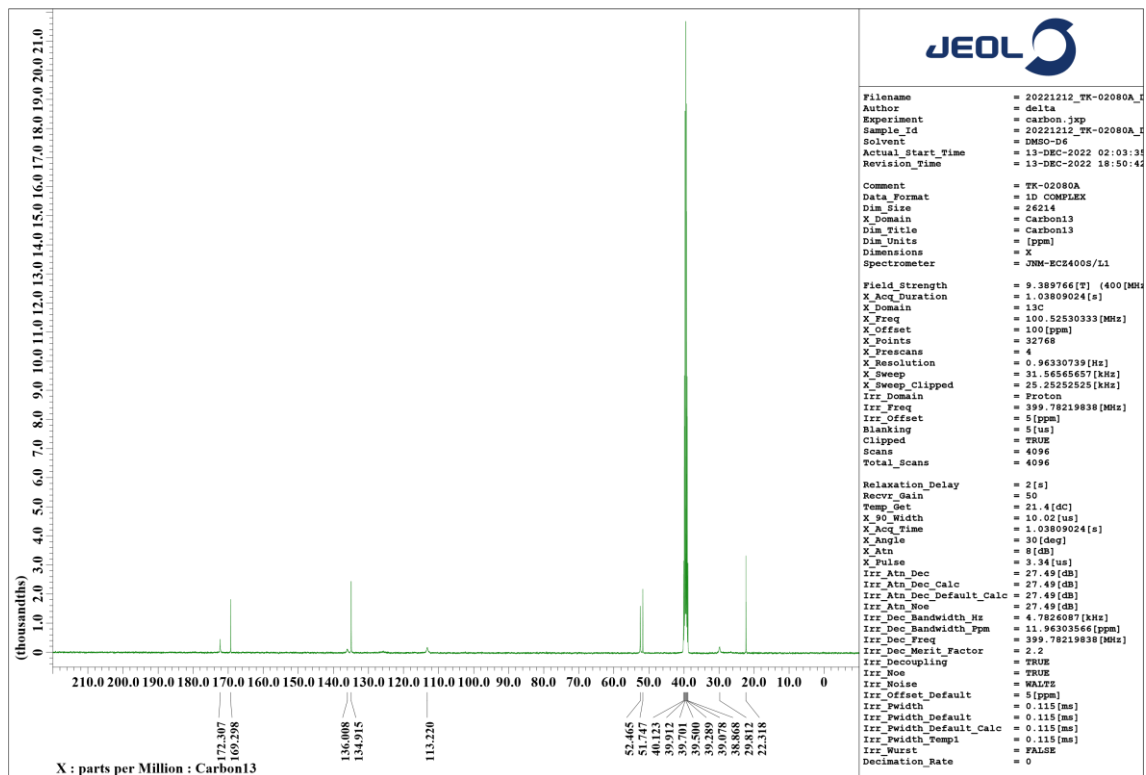

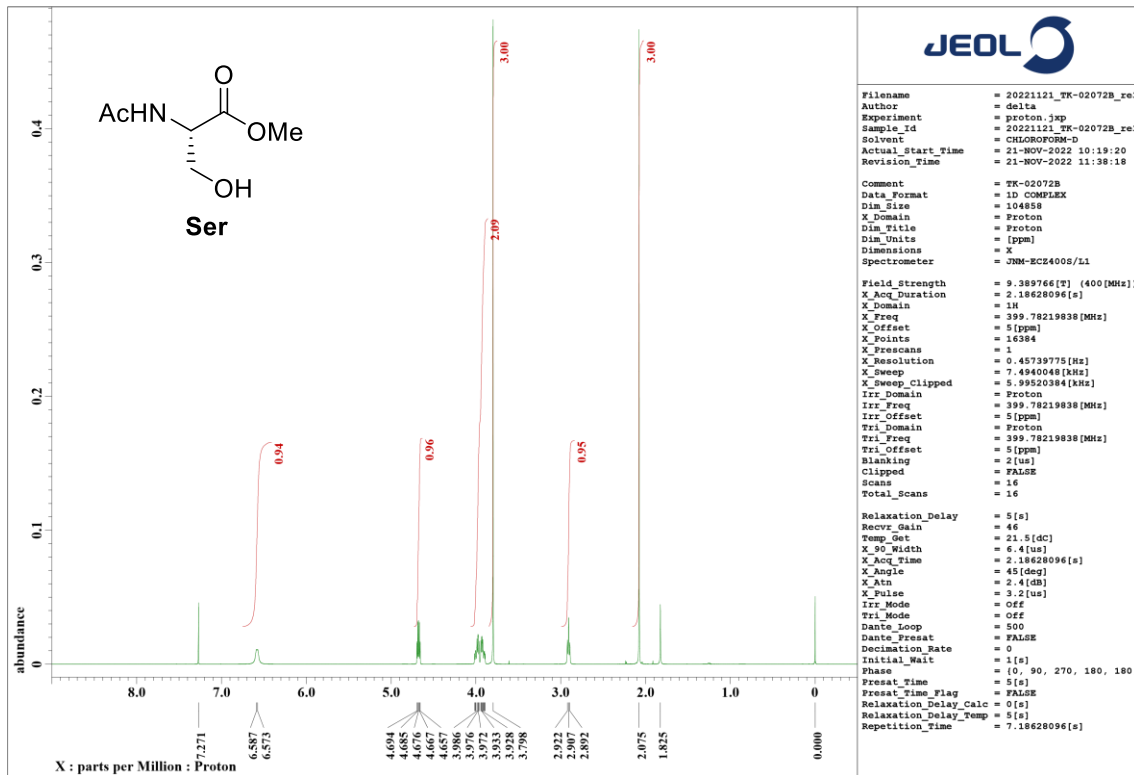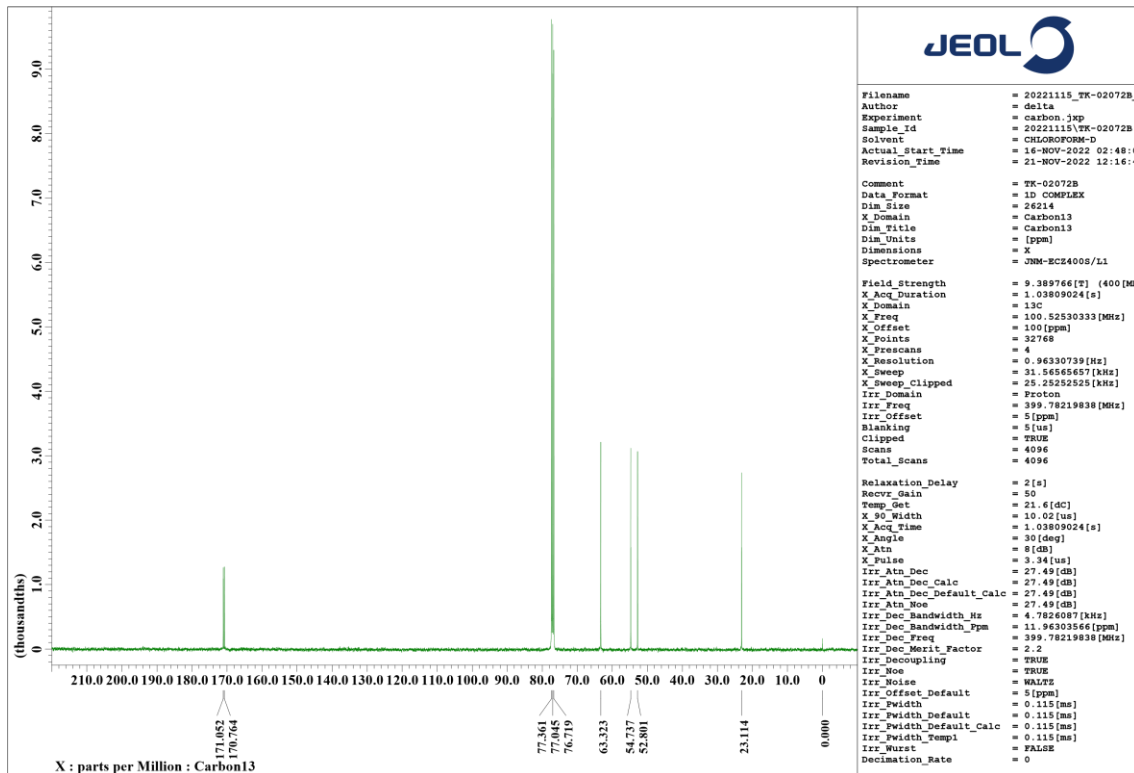

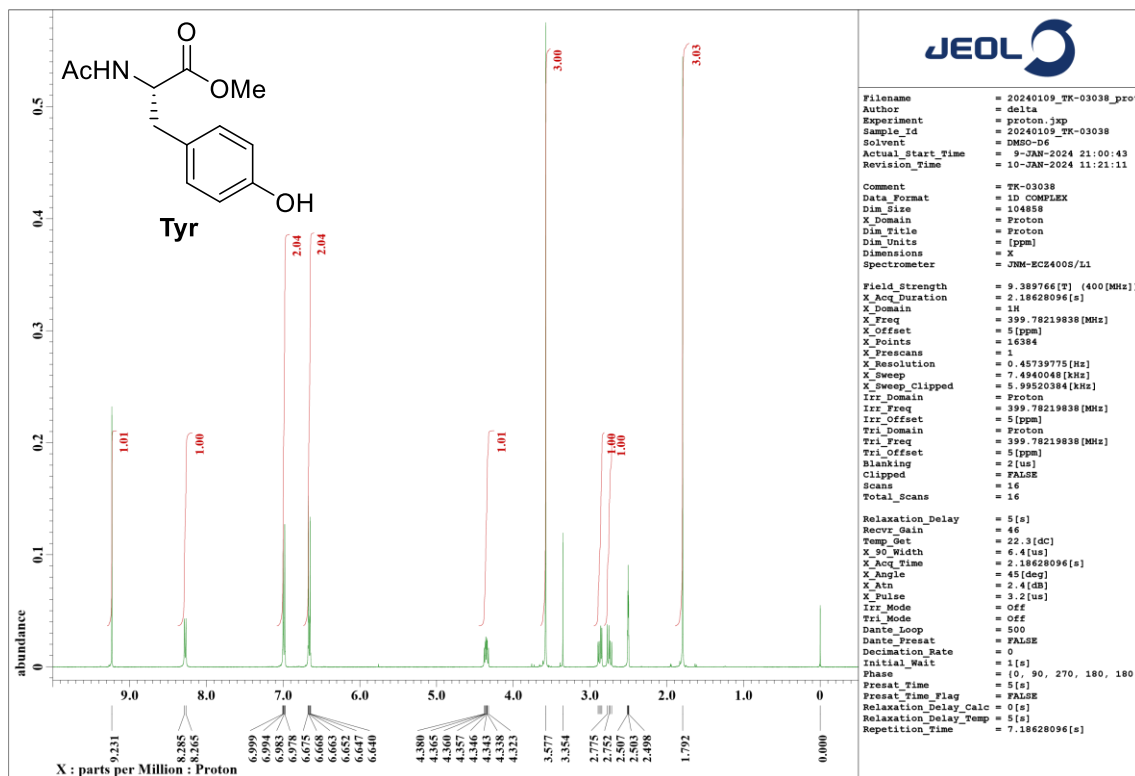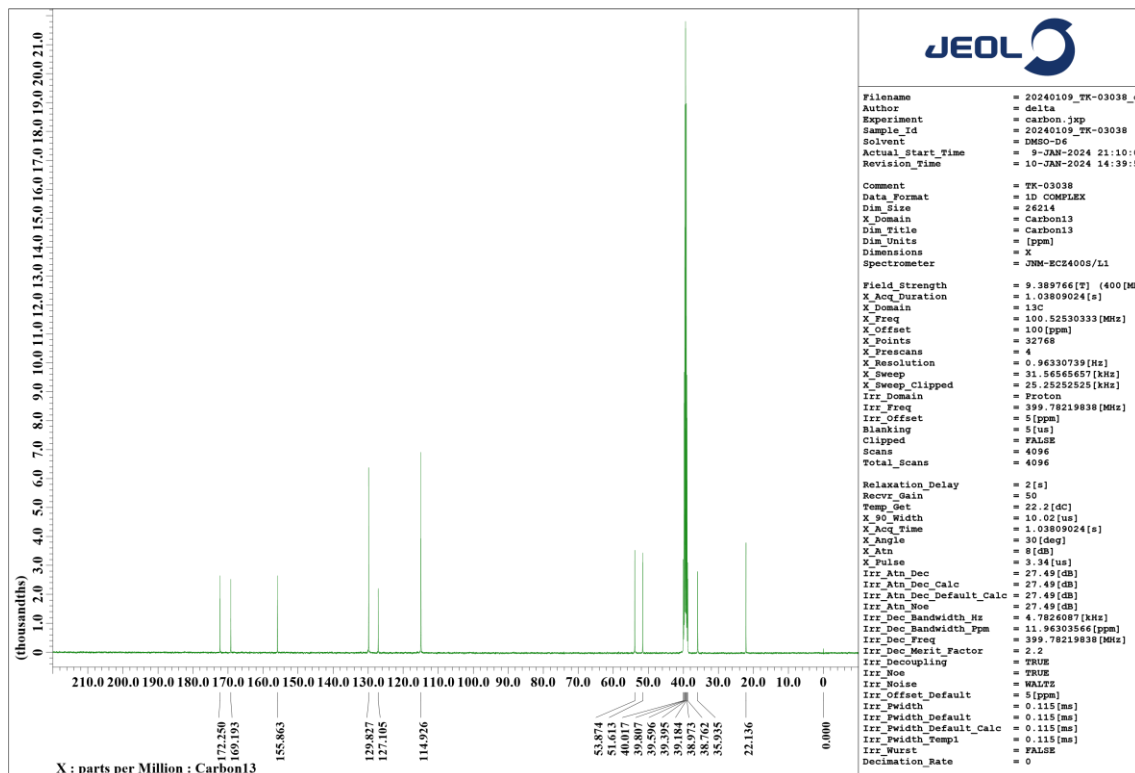

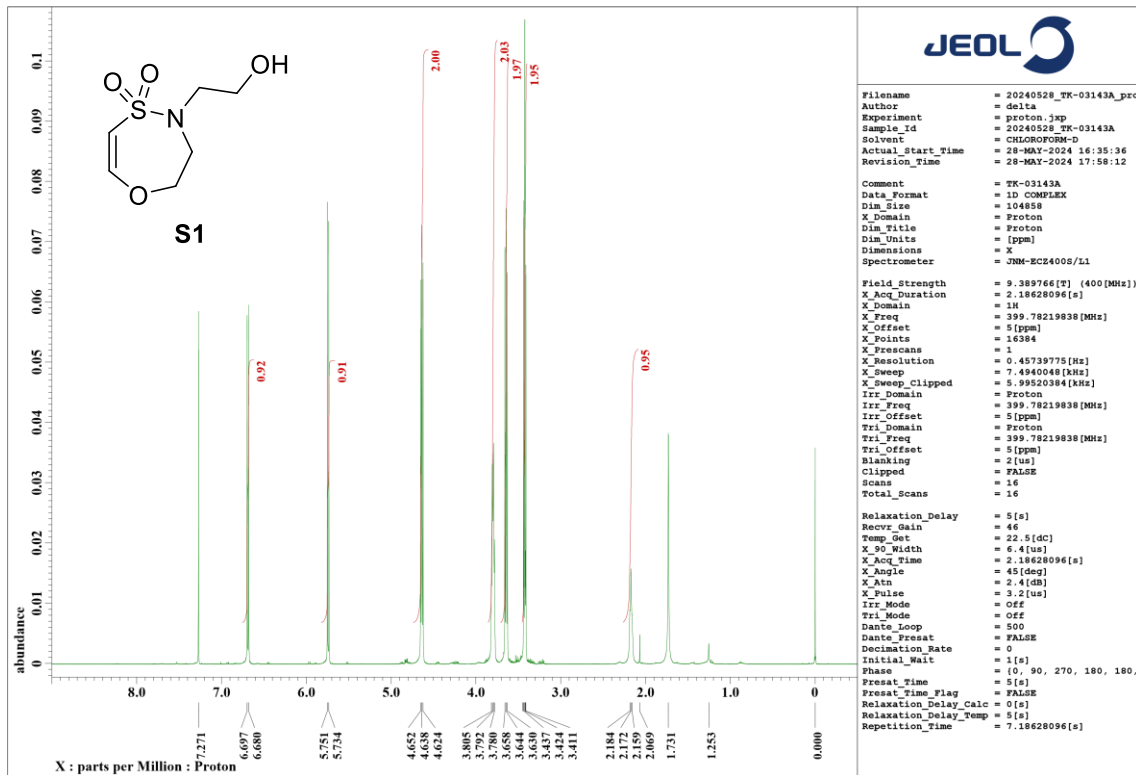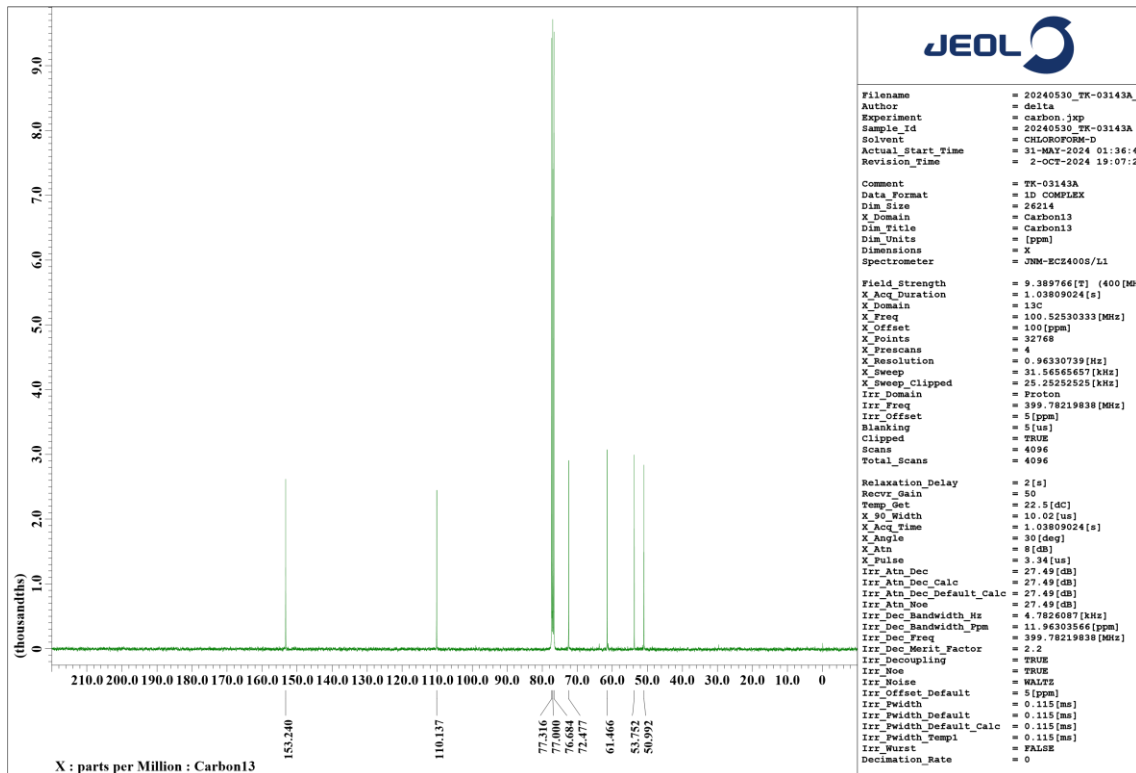

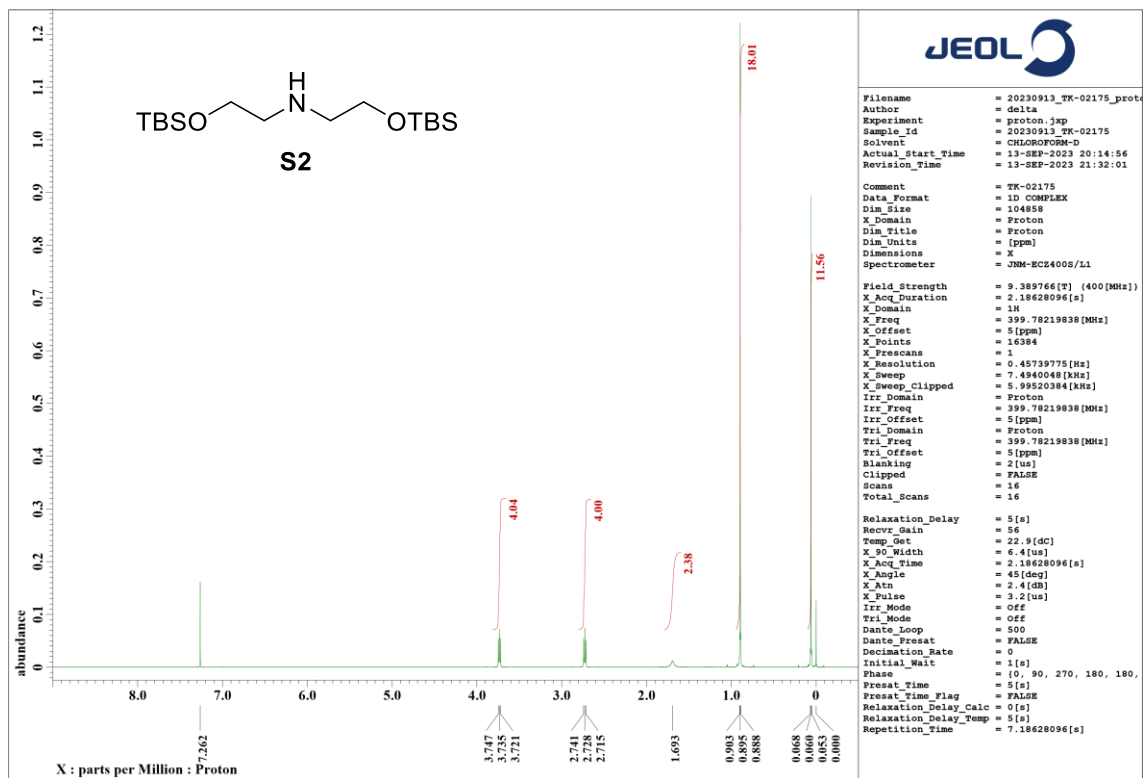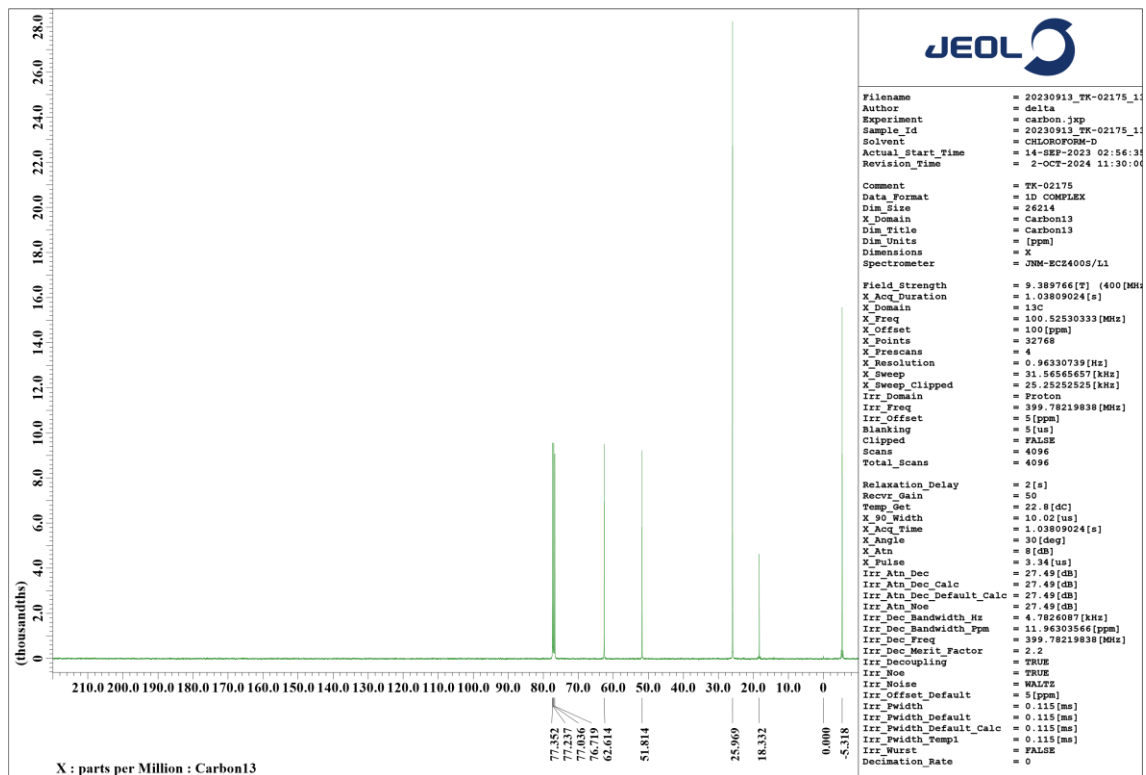

Supplement: d4ob01873g1.pdf [file d4ob01873g1.pdf]
